# Supplementary material for: Defining a Correlative Transcriptional Signature Associated with Bulk Histone H3 Acetylation Levels in Adult Glioblastomas
Source: MDPI journal article supplement (doi:10.3390/cells12030374), 2023-01-19
Supplement: s1 [file s1]

Supplementary material: Defining a correlative transcriptional signature associated with bulk histone H3 acetylation levels in adult glioblastomas

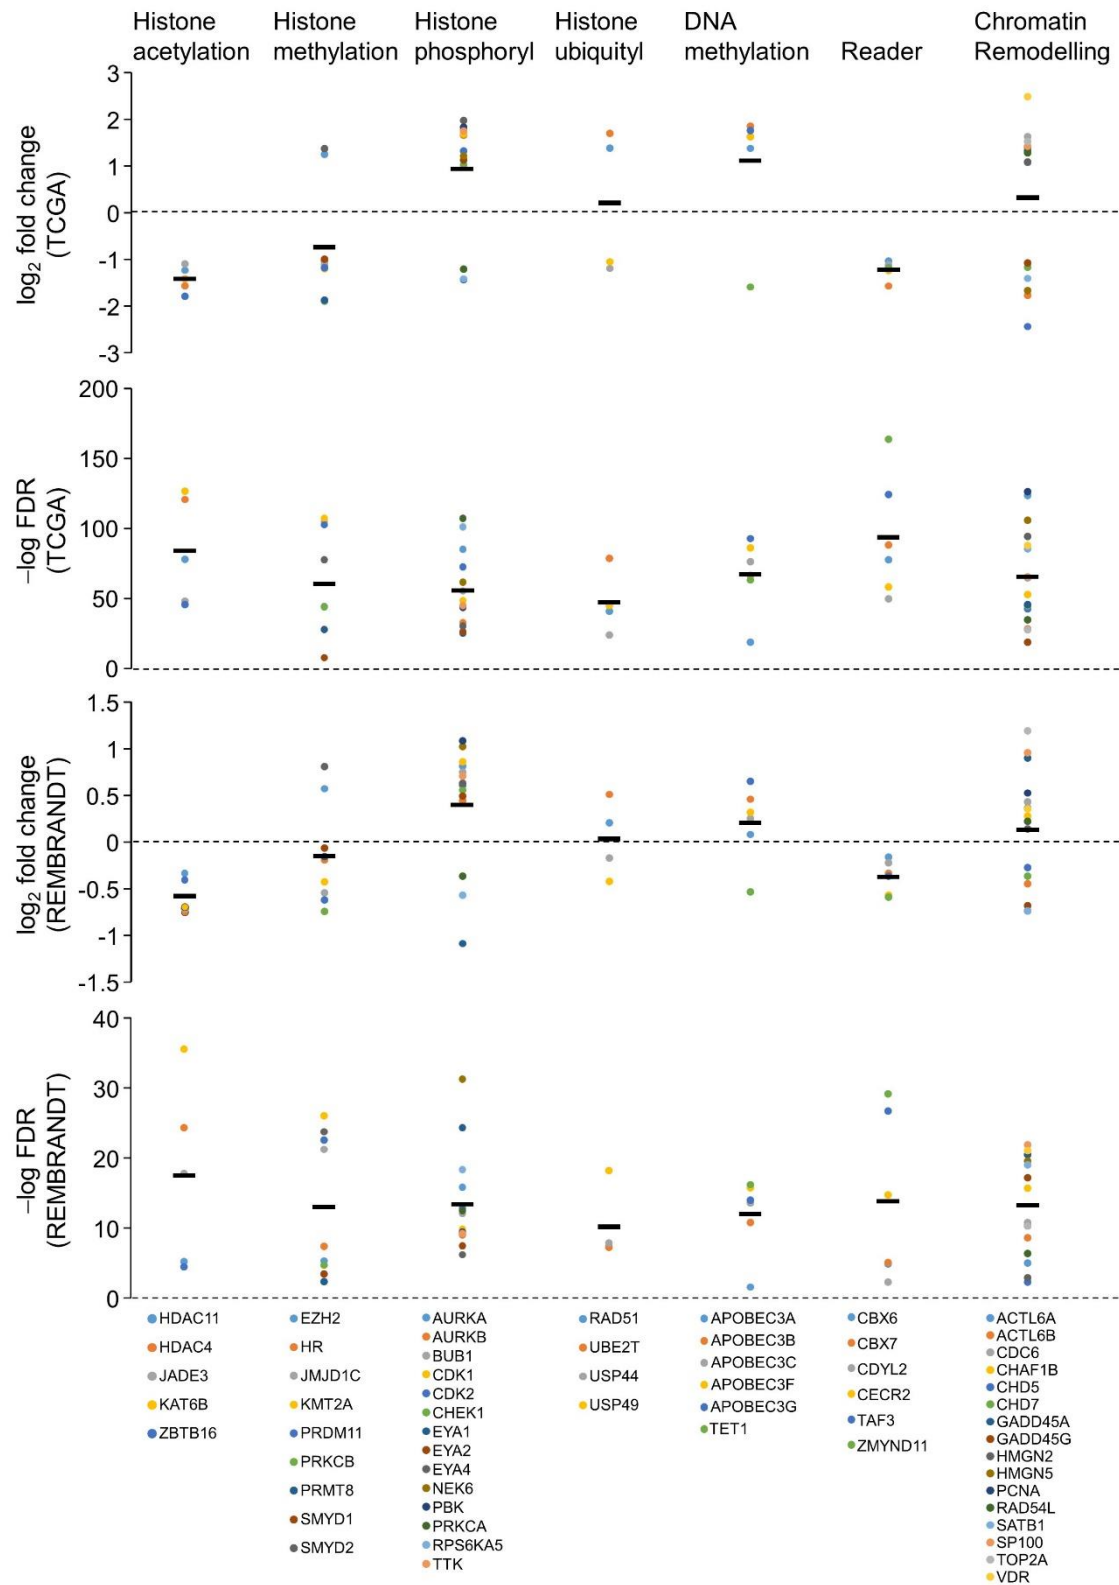

**Figure S1.** Differential expression changes of epigenetic-related genes in TCGA and REMBRANDT gliomas: Genes which differential expression between the datasets of “GBM” and “LGG” projects of TCGA that were also confirmed in the REMBRANDT cohort. FDR, false discovery rate.

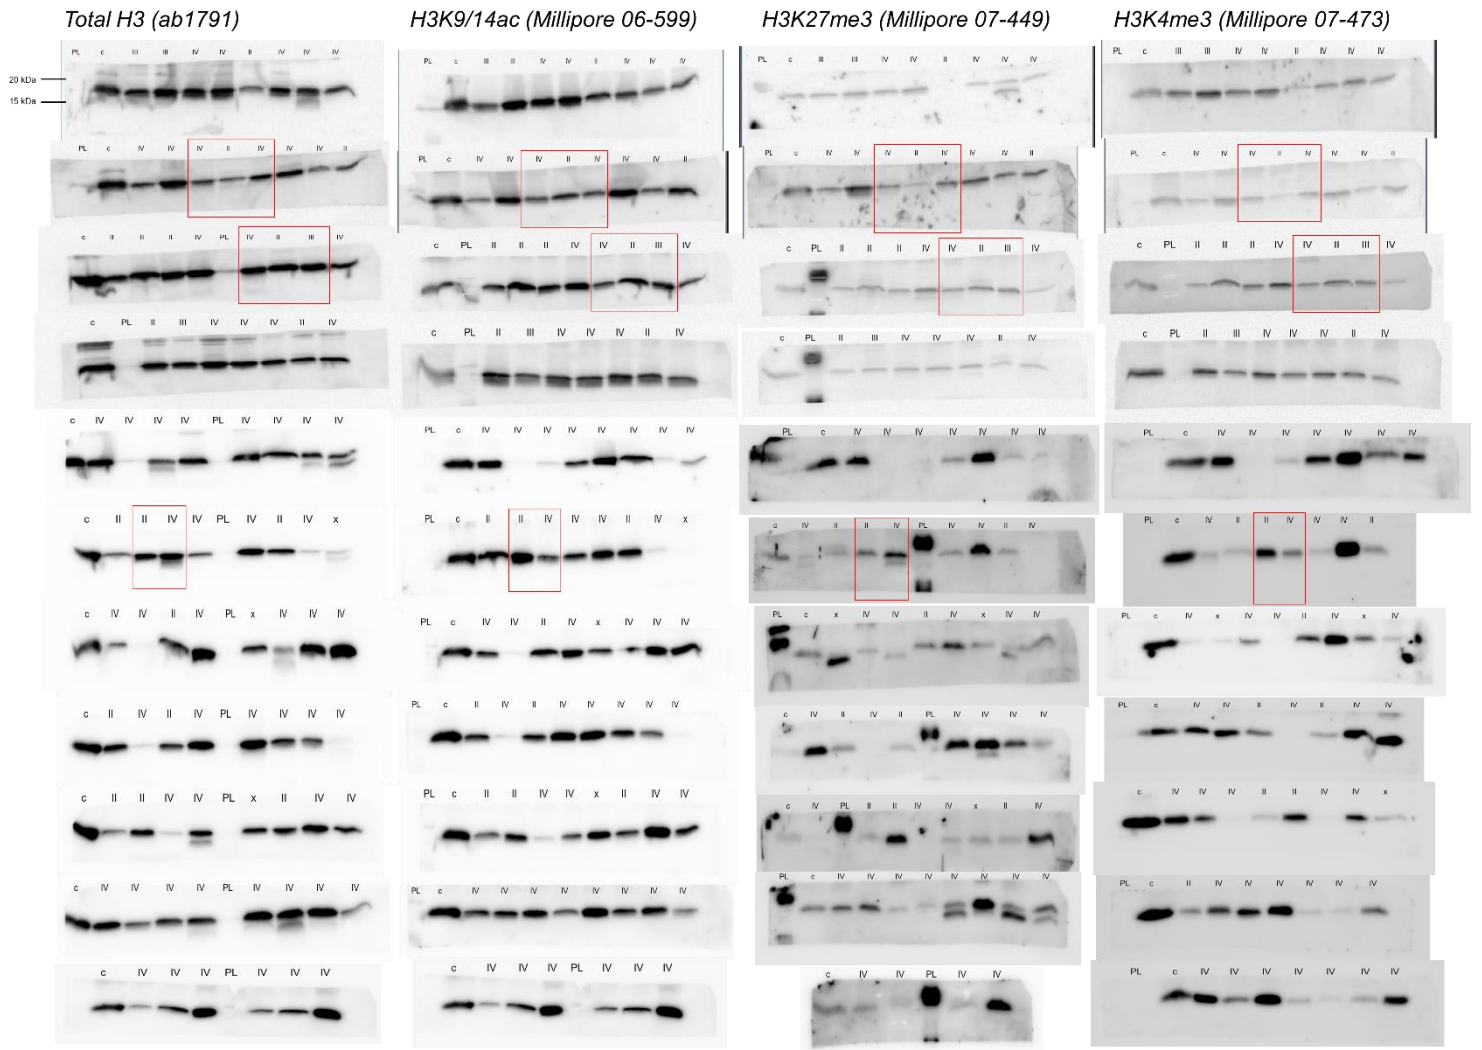

**Figure S2.** Raw western blots of histone H3 modifications in glioma resections: PL, protein ladder; x, discarded sample (doubtful diagnosis). c, the same non-related sample (mouse cerebellum) used as a reference for interblots normalization (ref. 23 of main text). Red squares indicate the samples that were used for the image crops shown in Figure 1C.

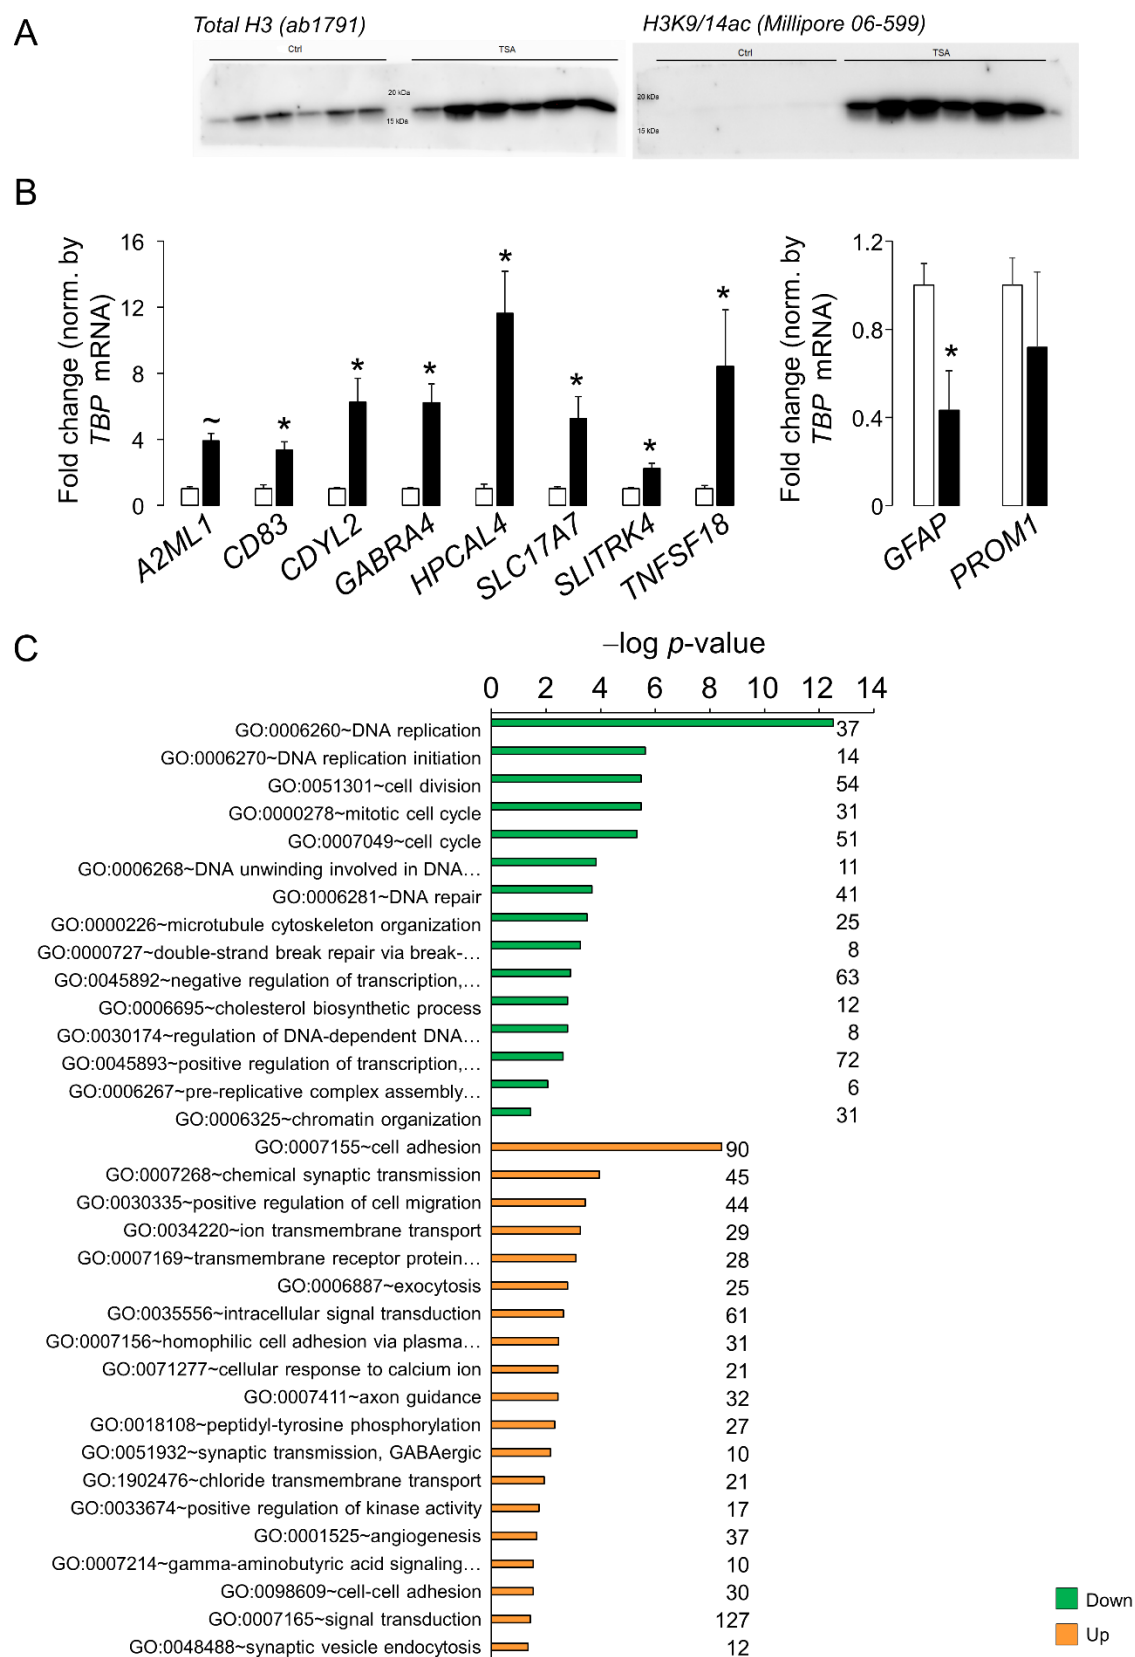

**Figure S3.** Histone H3 acetylation in TSA-treated glioma culture: (a) Raw western blots of histone H3 acetylation in glioma cultures treated with trichostatin A (TSA). (b) Validation of the RNA-seq by RT-qPCR assays in independent cultures. Data are expressed as the mean  $\pm$  SEM. n = 4 for each condition. Left panel, upregulated genes in the RNA-seq analysis; right panel, downregulated (GFAP)

---

and nonchanging genes (PROM1/CD133). ~, p-value < 0.1; \*, p-value < 0.05, Mann-Whitney U-test between both groups. (c) Significantly enriched Gene Ontology (GO) terms (FDR or false Discovery rate < 0.05, DAVID) in the differentially expressed genes between TSA and control cultures, represented as -log adjusted p-value (bars) and number of genes (besides the bars).
