# Supplementary material for: Defining a Correlative Transcriptional Signature Associated with Bulk Histone H3 Acetylation Levels in Adult Glioblastomas
Source: Cells. 2023 Jan 19;12(3):374. doi: 10.3390/cells12030374 (PMC9913072; doi:10.3390/cells12030374)
Supplement: Supplementary file 1 [file cells-12-00374-s001.zip › cells-2153571-Supplementary Tables.xlsx]

## Sheet: Table S1
Supplementary Table 1. Complete RNA-seq results: differential expression analysis between H3aclow / H3achigh glioblastomas
In blue, enriched genes in H3achigh (in red, also induced in TSA-treated cultures); in pink, enriched genes in H3low
gene_id	baseMean	log2FoldChange	lfcSE	stat	pvalue	padj	gene_name
ENSG00000133067.17	185.382	-4.75075	0.758502	-6.26333	3.77e-10	7.26e-06	LGR6
ENSG00000170549.4	111.361	-4.578	0.762744	-6.00201	1.95e-09	1.88e-05	IRX1
ENSG00000163285.8	46.5782	-4.23316	0.714518	-5.9245	3.13e-09	2.01e-05	GABRG1
ENSG00000105366.15	186.972	-3.51541	0.601401	-5.84536	5.05e-09	2.44e-05	SIGLEC8
ENSG00000067798.16	401.723	-2.97721	0.530186	-5.6154	1.96e-08	7.56e-05	NAV3
ENSG00000155008.14	201.598	-3.35163	0.616319	-5.43814	5.38e-08	0.000172984	APOOL
ENSG00000152760.10	177.6	-6.31475	1.16864	-5.4035	6.54e-08	0.000179987	TCTEX1D1
ENSG00000118308.15	39.3416	-3.95383	0.74538	-5.30445	1.13e-07	0.000272336	LRMP
ENSG00000128610.12	50.9348	-8.24254	1.56758	-5.25812	1.46e-07	0.000311745	FEZF1
ENSG00000154975.14	86.6167	-3.53309	0.681968	-5.18073	2.21e-07	0.000408171	CA10
ENSG00000275302.2	278.053	-3.66605	0.711806	-5.15036	2.6e-07	0.000408171	CCL4
ENSG00000186710.11	57.1283	-7.45417	1.44872	-5.14534	2.67e-07	0.000408171	CFAP73
ENSG00000172578.12	130.812	-3.34027	0.65167	-5.12571	2.96e-07	0.000408171	KLHL6
ENSG00000133640.20	60.5145	-6.4929	1.2661	-5.12826	2.92e-07	0.000408171	LRRIQ1
ENSG00000143476.18	114.194	3.07764	0.60926	5.05145	4.38e-07	0.000563521	DTL
ENSG00000134343.14	38.8283	-3.41125	0.680458	-5.01316	5.35e-07	0.000645124	ANO3
ENSG00000110318.15	239.801	-4.24627	0.85306	-4.97769	6.43e-07	0.000729685	CEP126
ENSG00000173391.9	386.825	-3.02446	0.610304	-4.95565	7.21e-07	0.000772062	OLR1
ENSG00000074706.13	175.739	-3.57836	0.728663	-4.91087	9.07e-07	0.000920022	IPCEF1
ENSG00000100884.9	92.5747	-3.28366	0.675273	-4.86272	1.16e-06	0.000975676	CPNE6
ENSG00000131951.11	43.8488	-6.10984	1.25022	-4.88701	1.02e-06	0.000975676	LRRC9
ENSG00000184005.11	94.2629	-3.59876	0.7376	-4.87901	1.07e-06	0.000975676	ST6GALNAC3
ENSG00000203685.10	440.387	-2.36809	0.487095	-4.86166	1.16e-06	0.000975676	STUM
ENSG00000073282.13	25.6312	-4.257	0.886752	-4.80066	1.58e-06	0.00127029	TP63
ENSG00000107159.13	121.315	3.3521	0.701106	4.78117	1.74e-06	0.00134392	CA9
ENSG00000188738.15	56.6838	-6.52235	1.37467	-4.74466	2.09e-06	0.00154397	FSIP2
ENSG00000226791.7	32.0017	-4.01969	0.848853	-4.73544	2.19e-06	0.00154397	LINC02611
ENSG00000106484.16	1261.98	1.90618	0.402977	4.73024	2.24e-06	0.00154397	MEST
ENSG00000257178.5	17.5672	-7.68232	1.6339	-4.70182	2.58e-06	0.00165699	AC103702.1
ENSG00000236438.7	104.649	-2.21543	0.470738	-4.70629	2.52e-06	0.00165699	FAM157A
ENSG00000018625.15	5198.89	-2.36267	0.50367	-4.69092	2.72e-06	0.00169137	ATP1A2
ENSG00000186417.14	358.29	-2.09225	0.447396	-4.67651	2.92e-06	0.00175792	GLDN
ENSG00000077279.18	1682.29	4.46216	0.962848	4.63433	3.58e-06	0.00209192	DCX
ENSG00000027075.15	138.219	-2.40434	0.521389	-4.61141	4e-06	0.00223959	PRKCH
ENSG00000120337.8	21.692	-4.30038	0.933246	-4.60798	4.07e-06	0.00223959	TNFSF18
ENSG00000182050.13	137.749	-4.81803	1.05139	-4.58254	4.59e-06	0.00239341	MGAT4C
ENSG00000163406.11	414.841	-2.49255	0.543729	-4.58419	4.56e-06	0.00239341	SLC15A2
ENSG00000112149.10	219.215	-2.06957	0.454127	-4.55726	5.18e-06	0.00249777	CD83
ENSG00000008226.20	207.966	-4.1711	0.914367	-4.56173	5.07e-06	0.00249777	DLEC1
ENSG00000172568.5	64.451	-3.95824	0.866878	-4.56609	4.97e-06	0.00249777	FNDC9
ENSG00000250125.4	33.7255	-3.89628	0.861516	-4.52259	6.11e-06	0.0028723	LINC02232
ENSG00000214688.6	94.2235	-4.68052	1.04084	-4.49687	6.9e-06	0.00295434	C10orf105
ENSG00000153283.13	13.372	-4.67957	1.03936	-4.50237	6.72e-06	0.00295434	CD96
ENSG00000163827.13	94.1639	-3.54302	0.787295	-4.50025	6.79e-06	0.00295434	LRRC2
ENSG00000167771.6	234.896	2.89559	0.641998	4.51028	6.47e-06	0.00295434	RCOR2
ENSG00000066294.14	437.52	-2.50975	0.562958	-4.45815	8.27e-06	0.00330297	CD84
ENSG00000188931.3	54.017	-5.2731	1.18226	-4.46018	8.19e-06	0.00330297	CFAP126
ENSG00000196167.10	69.4082	-3.07284	0.687906	-4.46695	7.93e-06	0.00330297	COLCA1
ENSG00000182742.6	30.7953	-4.61781	1.03658	-4.45485	8.4e-06	0.00330297	HOXB4
ENSG00000127329.15	293.093	-1.97292	0.444123	-4.44229	8.9e-06	0.00343175	PTPRB
ENSG00000160862.13	118.632	2.3996	0.543443	4.41555	1.01e-05	0.00379581	AZGP1
ENSG00000271605.6	50.9566	-2.84498	0.644817	-4.41207	1.02e-05	0.00379581	MILR1
ENSG00000157330.10	51.5366	-5.19174	1.17981	-4.40049	1.08e-05	0.0039285	C1orf158
ENSG00000119125.16	177.593	-3.44559	0.788137	-4.37181	1.23e-05	0.00431893	GDA
ENSG00000172123.12	67.3789	-3.01406	0.688905	-4.37514	1.21e-05	0.00431893	SLFN12
ENSG00000172058.15	27.7111	3.51121	0.804795	4.36286	1.28e-05	0.00441916	SERF1A
ENSG00000286403.1	34.86	-3.37647	0.779902	-4.32935	1.5e-05	0.00501886	AC010378.2
ENSG00000168675.18	975.832	-1.72542	0.398735	-4.32723	1.51e-05	0.00501886	LDLRAD4
ENSG00000062096.15	43.4432	-3.18304	0.742613	-4.28627	1.82e-05	0.00593682	ARSF
ENSG00000225684.4	25.8869	-5.05248	1.18359	-4.26877	1.97e-05	0.00631531	FAM225B
ENSG00000163885.12	36.2182	-5.045	1.18305	-4.26441	2e-05	0.00633437	CFAP100
ENSG00000120262.10	39.2981	-4.12128	0.972246	-4.23892	2.25e-05	0.00692765	CCDC170
ENSG00000182256.13	46.5596	-4.27207	1.00825	-4.23713	2.26e-05	0.00692765	GABRG3
ENSG00000139714.12	63.3694	-3.13303	0.743519	-4.21379	2.51e-05	0.00756424	MORN3
ENSG00000047936.10	18.5833	-3.66998	0.873752	-4.20025	2.67e-05	0.00790758	ROS1
ENSG00000287684.1	15.3516	-4.53584	1.0835	-4.1863	2.84e-05	0.00815836	AL392172.2
ENSG00000137142.5	121.212	4.39893	1.04996	4.18963	2.79e-05	0.00815836	IGFBPL1
ENSG00000215397.4	39.1579	3.56469	0.852289	4.18249	2.88e-05	0.0081744	SCRT2
ENSG00000140678.16	566.18	-2.78797	0.66925	-4.16581	3.1e-05	0.00852194	ITGAX
ENSG00000123360.12	122.988	-2.66984	0.641791	-4.15998	3.18e-05	0.00852194	PDE1B
ENSG00000152582.14	94.5445	-3.52585	0.845959	-4.16787	3.07e-05	0.00852194	SPEF2
ENSG00000103460.17	314.386	3.72806	0.895916	4.16118	3.17e-05	0.00852194	TOX3
ENSG00000070159.14	41.2893	-3.79871	0.915987	-4.14712	3.37e-05	0.00889114	PTPN3
ENSG00000166535.20	87.3422	-2.83634	0.687848	-4.1235	3.73e-05	0.00953865	A2ML1
ENSG00000276386.1	52.7616	-3.08872	0.749923	-4.11871	3.81e-05	0.00953865	CNTNAP3P2
ENSG00000230316.7	114.289	-4.16185	1.00979	-4.12149	3.76e-05	0.00953865	FEZF1-AS1
ENSG00000277778.2	77.6546	-3.0326	0.735199	-4.12487	3.71e-05	0.00953865	PGM5P2
ENSG00000172771.12	120.509	-3.59681	0.87495	-4.11087	3.94e-05	0.00974189	EFCAB12
ENSG00000042980.13	247.377	-2.6068	0.63502	-4.10507	4.04e-05	0.00986335	ADAM28
ENSG00000132938.20	58.7265	-3.93886	0.960797	-4.09957	4.14e-05	0.00997419	MTUS2
ENSG00000073737.16	30.0533	-5.9376	1.45506	-4.08067	4.49e-05	0.0105575	DHRS9
ENSG00000133055.9	95.6112	-3.89114	0.953474	-4.08101	4.48e-05	0.0105575	MYBPH
ENSG00000105339.10	952.824	-2.20758	0.542081	-4.07241	4.65e-05	0.010807	DENND3
ENSG00000198223.16	160.649	-3.13554	0.770601	-4.06896	4.72e-05	0.0108378	CSF2RA
ENSG00000101605.12	58.0032	-2.38465	0.586733	-4.06429	4.82e-05	0.0109271	MYOM1
ENSG00000160183.16	12.689	-6.15477	1.52067	-4.04742	5.18e-05	0.0116084	TMPRSS3
ENSG00000129654.8	494.198	-3.4192	0.846319	-4.04009	5.34e-05	0.0117049	FOXJ1
ENSG00000169313.9	177.649	-3.18757	0.78847	-4.04273	5.28e-05	0.0117049	P2RY12
ENSG00000249738.10	19.8894	-7.16905	1.78247	-4.02199	5.77e-05	0.012229	AC008691.1
ENSG00000116194.13	43.5322	-3.02816	0.753284	-4.01995	5.82e-05	0.012229	ANGPTL1
ENSG00000205835.9	14.3975	-7.39557	1.83782	-4.02411	5.72e-05	0.012229	GMNC
ENSG00000166501.14	478.224	-2.96905	0.73869	-4.01935	5.84e-05	0.012229	PRKCB
ENSG00000184949.16	191.489	-2.05697	0.513714	-4.00412	6.22e-05	0.0127665	FAM227A
ENSG00000173404.5	361.735	3.43078	0.856714	4.00458	6.21e-05	0.0127665	INSM1
ENSG00000279020.1	62.7643	-2.14645	0.537925	-3.99025	6.6e-05	0.0129839	C18orf15
ENSG00000169607.13	70.1605	2.75034	0.688494	3.99471	6.48e-05	0.0129839	CKAP2L
ENSG00000257017.9	147.184	-4.64687	1.16417	-3.99157	6.56e-05	0.0129839	HP
ENSG00000154978.13	6880.1	-3.10813	0.778478	-3.99257	6.54e-05	0.0129839	VOPP1
ENSG00000189056.14	109.511	-3.34146	0.838422	-3.98542	6.74e-05	0.0131169	RELN
ENSG00000167011.9	132.643	3.36139	0.844009	3.98265	6.82e-05	0.0131383	NAT16
ENSG00000167646.13	35.2454	-3.64536	0.916833	-3.97604	7.01e-05	0.0131791	DNAAF3
ENSG00000125735.10	112.864	-4.34738	1.09371	-3.97488	7.04e-05	0.0131791	TNFSF14
ENSG00000170419.10	71.8859	-3.88701	0.976958	-3.97869	6.93e-05	0.0131791	VSTM2A
ENSG00000072182.12	729.329	3.14328	0.794646	3.95557	7.64e-05	0.0140997	ASIC4
ENSG00000157554.19	71.6945	-2.37273	0.600225	-3.95307	7.72e-05	0.0140997	ERG
ENSG00000146147.15	62.5945	-3.12293	0.790231	-3.95192	7.75e-05	0.0140997	MLIP
ENSG00000073331.18	240.215	-2.43001	0.6166	-3.94098	8.11e-05	0.0146204	ALPK1
ENSG00000177283.7	115.621	2.06153	0.524119	3.93332	8.38e-05	0.0149547	FZD8
ENSG00000284526.1	24.3558	-4.7508	1.20974	-3.92712	8.6e-05	0.0151185	AC015802.6
ENSG00000254726.3	493.444	2.53436	0.645485	3.92629	8.63e-05	0.0151185	MEX3A
ENSG00000179542.16	86.9437	-3.01348	0.769024	-3.91857	8.91e-05	0.0154702	SLITRK4
ENSG00000127954.12	21.7072	-4.14178	1.06009	-3.907	9.34e-05	0.0160849	STEAP4
ENSG00000003400.14	101.912	-2.36878	0.607369	-3.90007	9.62e-05	0.0163675	CASP10
ENSG00000197410.14	223.171	-3.01101	0.772366	-3.89842	9.68e-05	0.0163675	DCHS2
ENSG00000154451.14	53.109	-2.33591	0.599506	-3.89639	9.76e-05	0.0163675	GBP5
ENSG00000279814.1	33.0261	-3.23468	0.831117	-3.89196	9.94e-05	0.0165253	AC010997.6
ENSG00000182379.10	127.782	2.32741	0.59895	3.88582	0.000101987	0.0168043	NXPH4
ENSG00000132821.12	158.166	-1.84649	0.475897	-3.88001	0.000104452	0.0170647	VSTM2L
ENSG00000228793.2	26.7788	-3.35695	0.866523	-3.87404	0.000107045	0.0171968	AL033523.1
ENSG00000109158.11	147.181	-3.03295	0.782535	-3.8758	0.000106274	0.0171968	GABRA4
ENSG00000110934.12	87.722	-2.38366	0.617587	-3.85963	0.000113557	0.0180922	BIN2
ENSG00000132434.9	2607.02	-3.32049	0.862246	-3.85098	0.000117645	0.0185898	LANCL2
ENSG00000012779.11	177.409	-2.18404	0.569378	-3.83584	0.000125135	0.0192443	ALOX5
ENSG00000108684.14	30.0894	-2.68797	0.700825	-3.83543	0.000125345	0.0192443	ASIC2
ENSG00000166446.15	156.317	-2.11383	0.550658	-3.83874	0.000123666	0.0192443	CDYL2
ENSG00000244681.1	17.1286	-6.96539	1.81647	-3.83458	0.00012578	0.0192443	MTHFD2P1
ENSG00000172243.17	215.629	-2.43142	0.634778	-3.83035	0.000127963	0.0193875	CLEC7A
ENSG00000164794.9	42.2297	-3.96403	1.03535	-3.82868	0.000128832	0.0193875	KCNV1
ENSG00000176887.7	2425.34	3.20122	0.83649	3.82697	0.000129733	0.0193875	SOX11
ENSG00000276070.5	141.463	-3.63544	0.95289	-3.81517	0.00013609	0.0200679	CCL4L2
ENSG00000233705.7	34.7513	-4.73773	1.24259	-3.81279	0.000137409	0.0200679	SLC26A4-AS1
ENSG00000162367.11	111.346	-2.59402	0.680288	-3.81313	0.000137218	0.0200679	TAL1
ENSG00000259404.5	50.4311	-2.63636	0.693368	-3.80226	0.000143382	0.0206322	EFL1P1
ENSG00000204740.11	18.8638	-6.88628	1.81113	-3.80221	0.000143413	0.0206322	MALRD1
ENSG00000137959.16	1793.32	-3.40377	0.896648	-3.79611	0.000146987	0.0208353	IFI44L
ENSG00000196209.13	102.244	-2.54094	0.669241	-3.79675	0.000146605	0.0208353	SIRPB2
ENSG00000231609.7	41.6302	-3.52638	0.929587	-3.79349	0.000148543	0.0209023	AC007098.1
ENSG00000231131.8	22.1008	-2.7883	0.736153	-3.78766	0.000152072	0.0210673	LNCAROD
ENSG00000176601.13	50.4634	-4.96359	1.31051	-3.78752	0.000152159	0.0210673	MAP3K19
ENSG00000162753.13	26.7634	-4.10392	1.08443	-3.78439	0.000154087	0.0210673	SLC9C2
ENSG00000136535.15	85.2141	-3.48222	0.920026	-3.78492	0.000153759	0.0210673	TBR1
ENSG00000277632.2	271.101	-3.28917	0.869783	-3.7816	0.000155825	0.0211549	CCL3
ENSG00000165757.9	288.476	-1.69052	0.447841	-3.77482	0.00016012	0.021586	JCAD
ENSG00000186297.12	36.7615	-4.02758	1.06746	-3.77305	0.000161266	0.0215895	GABRA5
ENSG00000225968.7	143.112	2.55631	0.67787	3.77109	0.000162536	0.0216094	ELFN1
ENSG00000279159.1	29.9089	-3.70003	0.986693	-3.74993	0.000176885	0.0233561	AC003681.1
ENSG00000008513.16	309.15	-1.81132	0.483481	-3.74641	0.000179381	0.0235245	ST3GAL1
ENSG00000113319.13	180.445	-2.4297	0.64916	-3.74284	0.000181954	0.0237007	RASGRF2
ENSG00000225511.7	28.6683	-4.20995	1.12647	-3.73731	0.000186	0.0237464	LINC00475
ENSG00000131771.14	590.072	-2.99405	0.80054	-3.74004	0.00018399	0.0237464	PPP1R1B
ENSG00000129204.16	90.4779	-3.451	0.922982	-3.73897	0.000184775	0.0237464	USP6
ENSG00000148660.20	647.994	-1.64073	0.440198	-3.72727	0.000193569	0.0243897	CAMK2G
ENSG00000080573.7	1063.72	-2.04193	0.547808	-3.72745	0.000193427	0.0243897	COL5A3
ENSG00000007264.15	35.5817	-2.68239	0.720592	-3.72248	0.000197279	0.0246957	MATK
ENSG00000175287.19	146.076	-2.59502	0.697483	-3.72055	0.000198789	0.0247242	PHYHD1
ENSG00000114204.14	40.546	-3.02328	0.814061	-3.71383	0.000204148	0.025228	SERPINI2
ENSG00000163630.11	54.0024	-3.38116	0.911643	-3.70887	0.000208187	0.0255632	SYNPR
ENSG00000267702.1	229.726	-1.9091	0.515013	-3.70689	0.000209817	0.0256003	AP005131.6
ENSG00000236333.4	15.1467	-4.25879	1.15035	-3.70216	0.000213769	0.0259185	TRHDE-AS1
ENSG00000119535.17	305.735	-2.49633	0.677454	-3.68488	0.000228814	0.0271533	CSF3R
ENSG00000231528.3	55.3661	-3.25081	0.88241	-3.68402	0.000229588	0.0271533	FAM225A
ENSG00000135838.13	315.48	-1.79995	0.488158	-3.68723	0.000226704	0.0271533	NPL
ENSG00000106952.7	28.8366	-2.70171	0.733043	-3.6856	0.000228163	0.0271533	TNFSF8
ENSG00000223612.3	501.067	-3.0132	0.818433	-3.68167	0.000231714	0.0272377	AC241585.1
ENSG00000165105.10	46.0203	-3.0048	0.816814	-3.67868	0.000234441	0.0273912	RASEF
ENSG00000146122.17	2142.03	-2.98919	0.81335	-3.67516	0.0002377	0.0276047	DAAM2
ENSG00000158270.12	261.3	-2.92111	0.795394	-3.67253	0.000240162	0.0277236	COLEC12
ENSG00000280441.3	82.2514	-1.87456	0.511403	-3.66553	0.000246832	0.028245	FP236383.3
ENSG00000104888.10	511.602	-3.17142	0.865393	-3.66472	0.000247609	0.028245	SLC17A7
ENSG00000165164.14	45.3258	-3.99586	1.09156	-3.6607	0.000251529	0.0285233	CFAP47
ENSG00000168918.14	739.269	-2.50286	0.687236	-3.64193	0.000270603	0.0305069	INPP5D
ENSG00000157152.17	264.199	-3.20542	0.881405	-3.63672	0.000276137	0.0308394	SYN2
ENSG00000128564.7	1901.76	3.09043	0.849919	3.63614	0.000276751	0.0308394	VGF
ENSG00000106714.17	131.729	-2.74635	0.755642	-3.63445	0.00027857	0.0308637	CNTNAP3
ENSG00000154479.13	28.0004	-4.10561	1.13103	-3.62998	0.00028344	0.0309741	CCDC173
ENSG00000039139.9	425.853	-3.69961	1.01868	-3.63176	0.000281495	0.0309741	DNAH5
ENSG00000182601.7	28.6972	-3.53766	0.974798	-3.62912	0.000284387	0.0309741	HS3ST4
ENSG00000106689.11	165.925	1.61285	0.444846	3.62564	0.000288245	0.0312179	LHX2
ENSG00000172264.17	44.1601	-2.87642	0.793673	-3.62419	0.000289865	0.031218	MACROD2
ENSG00000163071.11	74.2993	-4.46007	1.23154	-3.62155	0.000292839	0.031363	SPATA18
ENSG00000185742.7	93.9667	-2.78896	0.770451	-3.61991	0.000294708	0.0313888	C11orf87
ENSG00000237438.7	21.5584	-3.2774	0.908135	-3.60893	0.000307463	0.0325674	CECR7
ENSG00000100228.12	199.092	-1.63662	0.454519	-3.60077	0.000317281	0.0334237	RAB36
ENSG00000130208.9	433.166	-2.1477	0.596862	-3.59832	0.000320274	0.0335557	APOC1
ENSG00000183831.7	129.044	-2.53267	0.705426	-3.59027	0.000330337	0.0342378	ANKRD45
ENSG00000185518.11	246.121	-2.96828	0.826491	-3.59143	0.000328868	0.0342378	SV2B
ENSG00000259583.3	27.1688	-4.04839	1.12817	-3.58847	0.000332623	0.0342905	AC015712.2
ENSG00000272884.1	24.5899	3.36443	0.938868	3.5835	0.000339025	0.0347645	AC113189.4
ENSG00000081189.15	931.576	-2.10125	0.586739	-3.58123	0.000341984	0.0348824	MEF2C
ENSG00000111837.11	21.6427	-4.35655	1.21747	-3.57835	0.00034577	0.0350829	MAK
ENSG00000254838.5	55.4999	-2.67772	0.750186	-3.56941	0.000357787	0.0354503	GVINP1
ENSG00000228223.3	53.3617	-2.24894	0.630398	-3.56748	0.000360424	0.0354503	HCG11
ENSG00000228221.6	20.7216	-4.11447	1.15322	-3.5678	0.000359991	0.0354503	LINC00578
ENSG00000215475.5	20.851	-2.92308	0.818541	-3.57108	0.000355509	0.0354503	SIAH3
ENSG00000174326.12	30.3935	-2.87551	0.805562	-3.56958	0.000357559	0.0354503	SLC16A11
ENSG00000173705.9	37.3707	-2.60338	0.729034	-3.571	0.000355618	0.0354503	SUSD5
ENSG00000265625.1	18.629	-2.81416	0.790451	-3.5602	0.000370577	0.0358994	AC104564.5
ENSG00000134516.17	384.24	-2.4376	0.684239	-3.56251	0.000367331	0.0358994	DOCK2
ENSG00000183850.14	51.0885	2.10774	0.591912	3.5609	0.000369584	0.0358994	ZNF730
ENSG00000205710.4	43.2114	-2.08218	0.585938	-3.55358	0.000380025	0.0359662	C17orf107
ENSG00000162817.7	101.735	-2.50856	0.706002	-3.55319	0.000380595	0.0359662	C1orf115
ENSG00000146192.15	248.125	-2.19018	0.61603	-3.55531	0.00037754	0.0359662	FGD2
ENSG00000171815.5	45.9528	-3.55962	1.00059	-3.55753	0.000374353	0.0359662	PCDHB1
ENSG00000124766.7	1930.09	2.67966	0.753472	3.55641	0.000375955	0.0359662	SOX4
ENSG00000273136.7	258.765	-1.47669	0.416056	-3.54925	0.000386329	0.0361604	NBPF26
ENSG00000183160.9	297.953	-2.75584	0.776469	-3.5492	0.000386401	0.0361604	TMEM119
ENSG00000008300.17	907.91	2.19764	0.619843	3.54548	0.000391895	0.0363119	CELSR3
ENSG00000107099.15	595.197	-2.2969	0.647735	-3.54605	0.000391055	0.0363119	DOCK8
ENSG00000068781.21	51.4559	-3.32134	0.937096	-3.54429	0.000393671	0.0363119	STON1-GTF2A1L
ENSG00000112539.15	90.434	-3.62398	1.02475	-3.53644	0.000405566	0.0372309	C6orf118
ENSG00000090376.11	178.421	-2.13894	0.60555	-3.53223	0.000412073	0.037649	IRAK3
ENSG00000063015.20	808.861	2.55662	0.725946	3.52178	0.000428653	0.0389791	SEZ6
ENSG00000166888.12	292.92	-1.83906	0.522386	-3.52051	0.000430725	0.0389837	STAT6
ENSG00000007516.13	1161.85	-2.20569	0.62754	-3.51482	0.000440049	0.0396414	BAIAP3
ENSG00000159713.11	1052.08	-2.71843	0.774293	-3.51085	0.000446678	0.0400515	TPPP3
ENSG00000072657.9	34.4733	-4.14626	1.18336	-3.50381	0.000458659	0.0409353	TRHDE
ENSG00000134709.11	28.3763	-3.37098	0.962506	-3.50229	0.000461274	0.040979	HOOK1
ENSG00000284862.3	17.8925	-5.65448	1.61597	-3.49913	0.000466777	0.0410892	CCDC39
ENSG00000227032.1	10.697	-4.14424	1.18434	-3.4992	0.000466663	0.0410892	RPS2P36
ENSG00000198624.13	88.7291	-2.4089	0.689242	-3.495	0.000474063	0.0415409	CCDC69
ENSG00000106123.12	204.383	-2.37494	0.679765	-3.49377	0.000476252	0.0415438	EPHB6
ENSG00000150782.12	70.1746	-2.56397	0.734905	-3.48885	0.000485102	0.0417491	IL18
ENSG00000196091.14	100.992	-3.17299	0.909031	-3.49052	0.00048208	0.0417491	MYBPC1
ENSG00000183578.8	92.9162	-2.52587	0.723917	-3.48917	0.000484519	0.0417491	TNFAIP8L3
ENSG00000167513.9	86.2247	2.55094	0.731724	3.4862	0.000489926	0.0419769	CDT1
ENSG00000128805.14	158.396	-2.08283	0.598612	-3.47943	0.000502485	0.042849	ARHGAP22
ENSG00000171811.14	110.904	-2.7502	0.790668	-3.47833	0.00050455	0.042849	CFAP46
ENSG00000125089.17	530.733	-2.24553	0.646699	-3.47229	0.000516037	0.0436323	SH3TC1
ENSG00000137857.17	17.1445	-3.11208	0.896913	-3.46977	0.000520906	0.0438516	DUOX1
ENSG00000116983.13	375.388	-1.93542	0.558458	-3.46565	0.000528958	0.0443359	HPCAL4
ENSG00000169245.6	42.2795	-2.8005	0.809426	-3.45986	0.000540461	0.0449095	CXCL10
ENSG00000067715.14	618.507	-2.93773	0.848918	-3.46056	0.000539055	0.0449095	SYT1
ENSG00000173482.16	270.998	-1.84626	0.534965	-3.45118	0.000558147	0.04618	PTPRM
ENSG00000276085.1	132.236	-3.23569	0.939072	-3.44562	0.000569741	0.0469379	CCL3L1
ENSG00000143107.10	27.4622	-3.58103	1.04145	-3.43851	0.000584921	0.0478312	FNDC7
ENSG00000148935.11	44.6907	2.4006	0.698209	3.43822	0.000585546	0.0478312	GAS2
ENSG00000213420.8	298.864	3.01425	0.876998	3.43701	0.000588167	0.0478426	GPC2
ENSG00000152822.14	45.3991	-2.82551	0.822791	-3.43406	0.000594619	0.0478999	GRM1
ENSG00000225127.3	32.0022	3.34279	0.9731	3.43519	0.000592131	0.0478999	LINC00237
ENSG00000188729.6	14.8149	-5.54037	1.61372	-3.43328	0.000596326	0.0478999	OSTN
ENSG00000124203.6	35.3305	-4.28133	1.24748	-3.43197	0.000599203	0.0479313	ZNF831
ENSG00000011083.9	37.5307	-3.17813	0.926678	-3.42959	0.00060449	0.0481544	SLC6A7
ENSG00000162654.9	251.044	-2.78748	0.813901	-3.42484	0.000615159	0.0486026	GBP4
ENSG00000170624.13	67.8936	-3.13995	0.916661	-3.42542	0.000613844	0.0486026	SGCD
ENSG00000147459.18	403.757	-2.36889	0.692658	-3.42	0.000626206	0.0492209	DOCK5
ENSG00000187140.6	57.1321	3.69254	1.07995	3.41918	0.000628091	0.0492209	FOXD3
ENSG00000033122.20	219.817	-2.9408	0.860684	-3.41682	0.000633579	0.0494499	LRRC7
ENSG00000206199.11	17.428	-6.33123	1.85427	-3.41441	0.000639206	0.049669	ANKUB1
ENSG00000161835.11	132.419	-1.94189	0.568899	-3.41342	0.000641538	0.049669	GRASP
ENSG00000009790.15	53.6095	-2.73588	0.802208	-3.41044	0.000648592	0.0500142	TRAF3IP3
ENSG00000113739.10	284.121	2.54146	0.748067	3.39737	0.000680373	0.0522559	STC2
ENSG00000261997.1	41.4627	-2.2178	0.653047	-3.39608	0.000683589	0.0522945	AC007336.1
ENSG00000188153.13	570.629	-2.70347	0.797755	-3.38884	0.000701883	0.0534818	COL4A5
ENSG00000266714.9	461.68	-1.5157	0.447459	-3.38735	0.000705714	0.053562	MYO15B
ENSG00000231713.2	14.829	-3.08239	0.911368	-3.38216	0.000719176	0.0539564	AF064860.2
ENSG00000183486.13	238.972	-2.66092	0.786761	-3.38211	0.000719306	0.0539564	MX2
ENSG00000237065.2	27.9283	-2.80424	0.828837	-3.38334	0.000716088	0.0539564	NANOGP4
ENSG00000165304.8	66.3065	2.39562	0.708968	3.37903	0.000727414	0.0543531	MELK
ENSG00000153898.13	20.489	-4.05107	1.20155	-3.37153	0.000747516	0.0556394	MCOLN2
ENSG00000287966.1	13.84	-4.15018	1.23262	-3.36696	0.00076002	0.0563525	AL590062.1
ENSG00000205795.4	17.6082	-2.77388	0.824643	-3.36373	0.000768958	0.0567968	CYS1
ENSG00000277075.2	275.385	2.34567	0.698006	3.36053	0.000777929	0.0572402	HIST1H2AE
ENSG00000227039.6	30.9729	-2.7929	0.831759	-3.35782	0.000785604	0.0573716	ITGB2-AS1
ENSG00000136869.16	645.544	-2.10507	0.626919	-3.3578	0.000785668	0.0573716	TLR4
ENSG00000176076.7	62.7369	-3.27784	0.976681	-3.3561	0.000790507	0.0575071	KCNE5
ENSG00000148735.15	28.0183	-3.40657	1.01556	-3.35437	0.000795452	0.0576494	PLEKHS1
ENSG00000135245.10	607.694	2.29784	0.686571	3.34684	0.000817389	0.0590173	HILPDA
ENSG00000166741.7	574.894	-2.9687	0.887334	-3.34564	0.000820941	0.0590526	NNMT
ENSG00000115523.16	20.341	-3.63462	1.08806	-3.34045	0.000836424	0.0598559	GNLY
ENSG00000154556.18	310.763	-1.61391	0.483232	-3.33982	0.000838318	0.0598559	SORBS2
ENSG00000006116.3	23.2756	-3.56297	1.06736	-3.33813	0.000843443	0.0599996	CACNG3
ENSG00000165092.13	114.163	-2.83796	0.852268	-3.32989	0.000868808	0.0610918	ALDH1A1
ENSG00000139132.14	546.894	-1.61511	0.485306	-3.32802	0.000874642	0.0610918	FGD4
ENSG00000182162.11	22.2759	-2.77325	0.832474	-3.33133	0.000864317	0.0610918	P2RY8
ENSG00000169071.15	25.5981	-3.4737	1.04282	-3.33106	0.000865148	0.0610918	ROR2
ENSG00000106327.13	57.4465	3.01717	0.906455	3.32854	0.000873035	0.0610918	TFR2
ENSG00000261701.7	33.0053	-3.35844	1.00979	-3.32588	0.000881391	0.061341	HPR
ENSG00000180353.11	359.501	-2.14952	0.647157	-3.32148	0.000895426	0.0620936	HCLS1
ENSG00000258483.4	14.9582	-3.92782	1.18577	-3.31246	0.000924787	0.0637593	LINC02251
ENSG00000133246.12	88.3181	-1.99412	0.602076	-3.31208	0.000926061	0.0637593	PRAM1
ENSG00000138964.17	336.567	-2.27933	0.688415	-3.31098	0.000929692	0.0637815	PARVG
ENSG00000227811.3	32.884	2.18604	0.661151	3.30641	0.000944981	0.0644366	INKA2-AS1
ENSG00000258867.6	21.0821	-2.8217	0.853576	-3.30574	0.000947267	0.0644366	LINC01146
ENSG00000065717.15	365.254	2.07838	0.628833	3.30515	0.000949268	0.0644366	TLE2
ENSG00000224383.7	101.177	-3.54823	1.07459	-3.30193	0.00096022	0.0647989	PRR29
ENSG00000188322.7	641.781	2.53066	0.766493	3.30161	0.000961328	0.0647989	SBK1
ENSG00000112796.10	196.108	-2.81757	0.8544	-3.29771	0.000974751	0.0650338	ENPP5
ENSG00000185760.15	98.2581	-2.35584	0.714396	-3.29766	0.000974933	0.0650338	KCNQ5
ENSG00000269235.2	48.7292	-2.70828	0.820813	-3.29951	0.000968533	0.0650338	ZNF350-AS1
ENSG00000176428.6	149.831	1.79714	0.545729	3.2931	0.000990885	0.06587	VPS37D
ENSG00000102924.12	11.4731	-5.30578	1.6129	-3.28959	0.00100335	0.0664632	CBLN1
ENSG00000277224.2	208.93	2.37094	0.721368	3.28672	0.0010136	0.0664632	HIST1H2BF
ENSG00000137261.14	101.157	-2.06708	0.628564	-3.28857	0.00100697	0.0664632	KIAA0319
ENSG00000145506.14	35.0523	-2.78444	0.847163	-3.28678	0.00101339	0.0664632	NKD2
ENSG00000163803.13	106.629	-1.90713	0.580477	-3.28545	0.00101819	0.0665378	PLB1
ENSG00000175063.17	85.5462	2.38301	0.725621	3.2841	0.0010231	0.0666327	UBE2C
ENSG00000135333.14	24.7926	-2.71576	0.828474	-3.27803	0.00104534	0.0678012	EPHA7
ENSG00000228340.6	176.214	-2.21347	0.675395	-3.27729	0.00104807	0.0678012	MIR646HG
ENSG00000255197.6	89.7152	-2.12958	0.650571	-3.27341	0.00106259	0.0685104	AC090559.1
ENSG00000114268.12	404.979	1.27817	0.392027	3.26041	0.0011125	0.0714894	PFKFB4
ENSG00000123095.6	1239.91	-1.85014	0.568859	-3.25238	0.00114444	0.0728136	BHLHE41
ENSG00000175471.19	95.4381	-2.09328	0.643245	-3.25425	0.00113694	0.0728136	MCTP1
ENSG00000174453.10	48.562	2.5285	0.777279	3.25302	0.00114187	0.0728136	VWC2L
ENSG00000105251.10	260.881	2.86124	0.880255	3.25047	0.00115214	0.0728227	SHD
ENSG00000163235.16	82.9818	-1.67051	0.513846	-3.251	0.00114999	0.0728227	TGFA
ENSG00000181418.8	159.137	-2.51389	0.77381	-3.24872	0.00115925	0.073033	DDN
ENSG00000135898.10	13.8407	-3.95154	1.21888	-3.24194	0.00118718	0.073827	GPR55
ENSG00000172348.14	273.71	-2.38399	0.734943	-3.24378	0.00117955	0.073827	RCAN2
ENSG00000084453.16	118.976	-2.67018	0.82352	-3.24239	0.0011853	0.073827	SLCO1A2
ENSG00000181234.9	75.4165	-1.65583	0.510607	-3.24287	0.00118333	0.073827	TMEM132C
ENSG00000176124.14	267.981	-1.60084	0.494062	-3.24016	0.00119464	0.0740522	DLEU1
ENSG00000099617.4	68.1274	1.87397	0.578621	3.23869	0.00120081	0.0740604	EFNA2
ENSG00000163082.10	55.0567	-1.9312	0.596362	-3.2383	0.00120246	0.0740604	SGPP2
ENSG00000154237.13	438.566	-2.55565	0.78986	-3.23557	0.00121399	0.0742959	LRRK1
ENSG00000145335.15	107.936	-2.3301	0.720072	-3.23592	0.00121251	0.0742959	SNCA
ENSG00000285777.1	12.2502	-3.97275	1.22844	-3.23399	0.00122074	0.074473	AL139142.2
ENSG00000104972.15	186.779	-2.31704	0.716898	-3.23204	0.00122911	0.0745117	LILRB1
ENSG00000004799.8	199.832	-2.21692	0.685787	-3.23267	0.0012264	0.0745117	PDK4
ENSG00000114315.4	250.799	-1.63546	0.506706	-3.22763	0.0012482	0.0754319	HES1
ENSG00000278891.1	21.4678	-2.97355	0.922243	-3.22426	0.00126301	0.0755743	AC105101.1
ENSG00000188596.11	381.817	-3.10243	0.96204	-3.22485	0.00126041	0.0755743	CFAP54
ENSG00000106852.15	19.3961	-2.63099	0.816153	-3.22364	0.0012657	0.0755743	LHX6
ENSG00000122584.13	228.73	1.98001	0.614238	3.22352	0.00126624	0.0755743	NXPH1
ENSG00000129465.16	31.6347	-2.59947	0.80683	-3.22184	0.00127372	0.0757864	RIPK3
ENSG00000175305.17	76.5515	2.26277	0.704091	3.21375	0.00131015	0.077476	CCNE2
ENSG00000241769.7	63.8532	-1.90389	0.592333	-3.21423	0.00130796	0.077476	LINC00893
ENSG00000251441.3	28.631	-2.81953	0.878549	-3.2093	0.00133057	0.0784424	RTEL1P1
ENSG00000157856.12	21.8521	-2.92241	0.911241	-3.20707	0.00134095	0.0788135	DRC1
ENSG00000221946.7	154.392	2.26285	0.707278	3.19938	0.00137723	0.08059	FXYD7
ENSG00000162408.11	452.032	1.26259	0.394695	3.1989	0.00137954	0.08059	NOL9
ENSG00000151838.12	13.9759	-3.71473	1.16161	-3.19793	0.0013842	0.0806183	CCDC175
ENSG00000178038.17	79.8242	-1.95505	0.612056	-3.19423	0.00140205	0.0814119	ALS2CL
ENSG00000158062.20	285.86	-1.48706	0.465736	-3.19292	0.00140841	0.0815355	UBXN11
ENSG00000280042.1	22.2385	-2.13477	0.669903	-3.18669	0.00143909	0.0828143	AC022336.3
ENSG00000176659.9	15.7844	-3.45164	1.08295	-3.18725	0.00143632	0.0828143	C20orf197
ENSG00000287778.1	46.9258	-1.86289	0.585511	-3.18165	0.0014644	0.0837704	AC006230.1
ENSG00000050767.17	68.0403	-3.02161	0.949627	-3.18189	0.0014632	0.0837704	COL23A1
ENSG00000170959.14	66.1478	-3.13427	0.98565	-3.17991	0.00147323	0.0840264	DCDC1
ENSG00000282826.2	33.3475	-2.12746	0.670784	-3.1716	0.00151601	0.0862115	FRG1CP
ENSG00000178999.13	42.9852	2.19072	0.692272	3.16453	0.00155331	0.0875798	AURKB
ENSG00000236963.7	52.5746	-2.2283	0.70422	-3.1642	0.00155508	0.0875798	LINC01141
ENSG00000072858.10	78.165	-2.10602	0.665701	-3.16361	0.00155825	0.0875798	SIDT1
ENSG00000101194.18	61.1602	-2.46141	0.777508	-3.16576	0.00154677	0.0875798	SLC17A9
ENSG00000137462.8	393.512	-2.1828	0.690303	-3.16208	0.00156644	0.0877844	TLR2
ENSG00000140853.15	674.356	-1.50135	0.475272	-3.15892	0.00158356	0.0882309	NLRC5
ENSG00000115507.10	79.5403	-2.91271	0.921981	-3.15919	0.00158208	0.0882309	OTX1
ENSG00000133433.10	74.7012	-1.78978	0.566762	-3.1579	0.00158911	0.0882848	GSTT2B
ENSG00000222009.8	241.312	-1.94018	0.61527	-3.15338	0.0016139	0.0888938	BTBD19
ENSG00000245067.7	29.1749	-2.76134	0.875522	-3.15394	0.00161084	0.0888938	IGFBP7-AS1
ENSG00000145794.17	637.734	-1.58939	0.504008	-3.1535	0.00161327	0.0888938	MEGF10
ENSG00000288002.1	27.2456	3.09779	0.982704	3.15231	0.00161985	0.088927	AC091912.3
ENSG00000132357.14	60.3263	-1.99494	0.632989	-3.15161	0.00162373	0.088927	CARD6
ENSG00000112742.10	53.4299	2.04841	0.650379	3.14957	0.00163511	0.0892967	TTK
ENSG00000185274.12	110.946	-2.57838	0.819688	-3.14556	0.0016577	0.0902747	GALNT17
ENSG00000267640.6	102.488	-3.15311	1.00392	-3.14081	0.00168479	0.0914913	AC016582.3
ENSG00000258081.4	16.9455	3.29599	1.05048	3.1376	0.00170338	0.0922407	AL110292.1
ENSG00000262481.5	13.0896	3.39231	1.08151	3.13665	0.00170892	0.0922817	TMEM256-PLSCR3
ENSG00000162989.5	67.4025	-3.70035	1.18049	-3.1346	0.00172091	0.0926693	KCNJ3
ENSG00000203804.4	116.121	-1.70544	0.544588	-3.13161	0.00173851	0.0932527	ADAMTSL4-AS1
ENSG00000276903.1	93.9846	2.47538	0.790574	3.13112	0.00174141	0.0932527	HIST1H2AL
ENSG00000189057.11	50.832	2.39333	0.76539	3.12694	0.00176635	0.0941825	FAM111B
ENSG00000131095.13	127195	-1.94297	0.621436	-3.12658	0.00176855	0.0941825	GFAP
ENSG00000066248.15	180.99	-2.13315	0.68305	-3.12298	0.00179029	0.0950779	NGEF
ENSG00000171951.5	1284.13	2.31209	0.740781	3.12115	0.00180148	0.095409	SCG2
ENSG00000184156.17	619.092	-1.72056	0.551648	-3.11895	0.00181494	0.0955967	KCNQ3
ENSG00000143416.21	82.8322	-2.13813	0.685421	-3.11944	0.00181193	0.0955967	SELENBP1
ENSG00000274307.1	13.9674	-2.96988	0.952524	-3.1179	0.00182142	0.0956769	AC023449.2
ENSG00000287299.1	15.965	-2.81734	0.904606	-3.11444	0.00184296	0.0963151	AC012459.1
ENSG00000243629.2	26.0896	-4.27868	1.37386	-3.11434	0.00184357	0.0963151	LINC00880
ENSG00000132932.17	152.72	-2.35425	0.756468	-3.11216	0.00185726	0.0965286	ATP8A2
ENSG00000244607.7	44.0967	-2.88878	0.928244	-3.11209	0.00185767	0.0965286	CCDC13
ENSG00000284977.2	66.4568	-2.52063	0.810691	-3.10923	0.00187573	0.0969446	AL160272.1
ENSG00000185774.16	59.9513	-2.4435	0.785785	-3.10962	0.00187326	0.0969446	KCNIP4
ENSG00000162643.13	33.7536	-3.34206	1.07579	-3.10661	0.00189245	0.0975472	WDR63
ENSG00000155966.14	36.7522	-2.33848	0.753408	-3.10387	0.00191005	0.0976707	AFF2
ENSG00000134042.13	336.333	-1.83119	0.589855	-3.10447	0.00190618	0.0976707	MRO
ENSG00000125851.10	86.4983	-2.68647	0.86551	-3.10392	0.00190976	0.0976707	PCSK2
ENSG00000285972.1	14.9721	-3.31907	1.06974	-3.1027	0.00191765	0.0978002	CERNA2
ENSG00000261795.1	29.0975	-2.42655	0.784445	-3.09333	0.00197927	0.100676	AC093627.7
ENSG00000143869.7	22.7386	-2.71574	0.87816	-3.09254	0.00198453	0.100678	GDF7
ENSG00000123496.8	40.7014	-4.60551	1.49028	-3.09035	0.00199918	0.101155	IL13RA2
ENSG00000141506.13	222.779	-2.38371	0.772352	-3.0863	0.00202665	0.102277	PIK3R5
ENSG00000235934.2	42.4481	2.43701	0.790829	3.08158	0.00205903	0.103525	AC007405.2
ENSG00000186471.13	11.4385	-6.36923	2.06785	-3.08013	0.00206912	0.103525	AKAP14
ENSG00000268388.6	13.0928	-3.41097	1.10836	-3.07749	0.00208751	0.103525	FENDRR
ENSG00000108231.13	187.493	-2.53855	0.824913	-3.07736	0.00208846	0.103525	LGI1
ENSG00000114805.17	95.2441	-2.24276	0.728813	-3.07728	0.00208897	0.103525	PLCH1
ENSG00000112343.11	225.877	-1.63385	0.53057	-3.07942	0.00207405	0.103525	TRIM38
ENSG00000126562.17	150.769	3.69003	1.19778	3.08073	0.00206495	0.103525	WNK4
ENSG00000118997.14	639.57	-2.76355	0.898351	-3.07624	0.00209627	0.10362	DNAH7
ENSG00000153234.14	168.606	-1.99914	0.65043	-3.07356	0.00211523	0.104024	NR4A2
ENSG00000164188.8	128.324	-2.43433	0.792012	-3.0736	0.00211489	0.104024	RANBP3L
ENSG00000169169.14	427.994	1.33607	0.434928	3.07194	0.00212672	0.104058	CPT1C
ENSG00000174776.11	206.258	-2.44846	0.79702	-3.07202	0.00212619	0.104058	WDR49
ENSG00000269155.2	34.3612	3.8464	1.25293	3.06992	0.00214113	0.104498	AL009178.2
ENSG00000188511.12	36.2785	-2.19863	0.717064	-3.06616	0.00216826	0.104761	C22orf34
ENSG00000105246.6	31.4497	-2.91204	0.949706	-3.06625	0.00216761	0.104761	EBI3
ENSG00000111704.11	13.6716	3.3414	1.08957	3.06672	0.0021642	0.104761	NANOG
ENSG00000046889.19	1036.35	-1.53459	0.500337	-3.06711	0.00216141	0.104761	PREX2
ENSG00000129810.15	40.6129	2.58896	0.844648	3.06513	0.00217575	0.10486	SGO1
ENSG00000285994.1	28.7379	-2.15188	0.702399	-3.06361	0.0021868	0.10513	AL731559.1
ENSG00000168490.14	503.192	-1.75193	0.57203	-3.06265	0.00219383	0.105206	PHYHIP
ENSG00000066382.16	163.801	1.54994	0.506819	3.05817	0.00222694	0.106242	MPPED2
ENSG00000157110.16	143.563	-2.22932	0.729134	-3.05749	0.00223198	0.106242	RBPMS
ENSG00000214338.10	253.461	1.64843	0.539021	3.05819	0.00222678	0.106242	SOGA3
ENSG00000180263.14	188.4	-1.49825	0.490145	-3.05675	0.00223753	0.106244	FGD6
ENSG00000006016.11	107.667	-2.33339	0.764489	-3.05222	0.00227154	0.107068	CRLF1
ENSG00000167619.13	218.75	1.39266	0.456228	3.05256	0.002269	0.107068	TMEM145
ENSG00000232810.4	23.635	-2.65457	0.869345	-3.05353	0.0022617	0.107068	TNF
ENSG00000176171.11	563.55	1.46278	0.479672	3.04955	0.00229187	0.107685	BNIP3
ENSG00000170743.17	47.1342	-2.86215	0.938708	-3.04903	0.00229581	0.107685	SYT9
ENSG00000054803.4	27.5556	-2.81369	0.923693	-3.04613	0.00231805	0.108465	CBLN4
ENSG00000212766.9	14.374	-4.1961	1.37876	-3.04339	0.00233928	0.109193	EWSAT1
ENSG00000228408.6	26.9339	-2.81666	0.926191	-3.04112	0.00235702	0.109755	AL031056.1
ENSG00000145020.15	80.8614	-1.85933	0.611902	-3.03861	0.00237676	0.110408	AMT
ENSG00000286715.1	17.0495	-2.70413	0.890719	-3.03589	0.00239825	0.111138	AL589863.2
ENSG00000168497.5	105.734	-1.86934	0.616829	-3.03056	0.00244099	0.112847	CAVIN2
ENSG00000145864.12	222.578	-2.80569	0.927037	-3.02651	0.00247393	0.114097	GABRB2
ENSG00000163918.10	67.6836	1.59035	0.525662	3.02543	0.00248276	0.114231	RFC4
ENSG00000279693.1	31.7179	3.39729	1.12424	3.02185	0.00251237	0.115318	AC099521.2
ENSG00000113327.16	178.689	-2.54814	0.843458	-3.02106	0.00251888	0.115342	GABRG2
ENSG00000104722.14	71.8848	-2.68038	0.888216	-3.01771	0.00254688	0.116348	NEFM
ENSG00000113749.7	99.3787	-1.6614	0.550982	-3.01534	0.0025669	0.116985	HRH2
ENSG00000272163.1	24.5746	-3.43456	1.13936	-3.01447	0.00257432	0.117047	AF106564.1
ENSG00000196159.11	139.34	-1.77863	0.59023	-3.01345	0.00258297	0.117164	FAT4
ENSG00000167434.10	16.4853	-2.67458	0.888511	-3.01018	0.00261096	0.118155	CA4
ENSG00000148408.13	136.948	-2.73762	0.910315	-3.00734	0.00263548	0.118327	CACNA1B
ENSG00000150893.11	1396.29	2.92957	0.973635	3.0089	0.00262199	0.118327	FREM2
ENSG00000152689.18	212.228	-1.81758	0.60447	-3.0069	0.0026393	0.118327	RASGRP3
ENSG00000164342.12	118.971	-1.78908	0.594894	-3.00739	0.00263504	0.118327	TLR3
ENSG00000183773.15	75.535	-2.78744	0.927513	-3.00529	0.00265331	0.118404	AIFM3
ENSG00000182836.10	46.2616	-2.62915	0.874762	-3.00556	0.0026509	0.118404	PLCXD3
ENSG00000228058.2	29.5422	-2.75295	0.916375	-3.00418	0.00266299	0.118562	LINC01736
ENSG00000103811.16	305.378	-2.22382	0.740554	-3.00291	0.0026741	0.118782	CTSH
ENSG00000228463.10	99.8308	1.8564	0.618664	3.00066	0.00269399	0.119116	AP006222.1
ENSG00000121895.8	26.8521	-2.97145	0.990257	-3.00068	0.00269377	0.119116	TMEM156
ENSG00000284762.1	15.3262	3.81439	1.27232	2.99798	0.00271778	0.119893	AC022414.1
ENSG00000186094.17	75.628	-2.30738	0.770994	-2.99273	0.00276497	0.121696	AGBL4
ENSG00000198626.17	263.314	-2.73214	0.913175	-2.99192	0.00277233	0.121743	RYR2
ENSG00000164109.14	88.0612	1.89049	0.632478	2.98902	0.00279874	0.122623	MAD2L1
ENSG00000145242.13	204.786	1.41014	0.471921	2.98808	0.00280739	0.122723	EPHA5
ENSG00000130035.8	592.892	-1.86151	0.623377	-2.98618	0.00282487	0.123159	GALNT8
ENSG00000185811.19	230.007	-2.10476	0.704969	-2.98561	0.00283013	0.123159	IKZF1
ENSG00000287372.1	10.1079	-3.92014	1.31498	-2.98115	0.00287168	0.124	AL627316.1
ENSG00000187912.11	22.6218	-2.54561	0.854206	-2.98009	0.00288163	0.124	CLEC17A
ENSG00000173557.15	14.6804	-2.812	0.94317	-2.98143	0.00286904	0.124	FAM166C
ENSG00000166928.11	43.1531	-2.28506	0.766613	-2.98072	0.0028757	0.124	MS4A14
ENSG00000070882.13	680.521	-1.90178	0.637901	-2.98131	0.00287015	0.124	OSBPL3
ENSG00000183798.5	400.536	-2.86592	0.962448	-2.97774	0.00290378	0.124675	EMILIN3
ENSG00000160188.10	76.6275	-2.87735	0.968562	-2.97075	0.00297075	0.127267	RSPH1
ENSG00000168661.14	51.3943	1.5667	0.52758	2.9696	0.0029819	0.127461	ZNF30
ENSG00000151952.16	39.141	-2.97191	1.00112	-2.96858	0.00299175	0.127599	TMEM132D
ENSG00000114529.12	19.81	-2.60621	0.878348	-2.96717	0.00300553	0.127904	C3orf52
ENSG00000171509.16	16.7795	-4.06307	1.37046	-2.96475	0.00302925	0.12863	RXFP1
ENSG00000177989.13	100.948	-2.51345	0.848498	-2.96224	0.00305414	0.129402	ODF3B
ENSG00000176463.14	282.501	-2.38573	0.805793	-2.96073	0.00306914	0.129468	SLCO3A1
ENSG00000136111.14	300.874	-1.5887	0.536581	-2.96079	0.0030685	0.129468	TBC1D4
ENSG00000288041.1	19.8136	4.12417	1.39491	2.95659	0.00311057	0.130754	AC092819.3
ENSG00000174938.14	1304.76	1.56029	0.527778	2.95633	0.0031132	0.130754	SEZ6L2
ENSG00000122756.15	263.147	1.54116	0.521661	2.95432	0.00313357	0.131039	CNTFR
ENSG00000248429.5	51.6775	-2.53717	0.858611	-2.95497	0.00312704	0.131039	FAM198B-AS1
ENSG00000242797.3	14.372	3.38761	1.14785	2.95127	0.00316473	0.131486	GLYCTK-AS1
ENSG00000138642.14	381.686	-2.03416	0.689168	-2.95161	0.00316121	0.131486	HERC6
ENSG00000183696.14	395.241	1.34481	0.455488	2.95246	0.00315255	0.131486	UPP1
ENSG00000150873.11	62.2953	-2.54505	0.86291	-2.94938	0.00318415	0.131725	C2orf50
ENSG00000134690.11	76.6676	2.10414	0.713311	2.94982	0.00317958	0.131725	CDCA8
ENSG00000148204.12	2249.91	-1.57262	0.533959	-2.94522	0.0032273	0.133165	CRB2
ENSG00000114812.13	38.5854	-2.45927	0.835154	-2.94469	0.00323275	0.133165	VIPR1
ENSG00000203799.13	76.5781	-3.63576	1.23536	-2.94308	0.00324969	0.133577	CCDC162P
ENSG00000166006.13	127.538	-2.26126	0.768555	-2.94223	0.00325862	0.133659	KCNC2
ENSG00000163395.16	65.2621	3.95569	1.34665	2.93744	0.00330936	0.135242	IGFN1
ENSG00000168743.12	269.538	-2.70985	0.922576	-2.93726	0.00331125	0.135242	NPNT
ENSG00000179348.11	24.1464	-2.086	0.711028	-2.93378	0.00334864	0.136192	GATA2
ENSG00000198883.12	12.2502	-3.02048	1.02942	-2.93417	0.00334443	0.136192	PNMA5
ENSG00000173208.4	148.966	-1.56044	0.53239	-2.93101	0.00337863	0.136517	ABCD2
ENSG00000232310.8	25.4667	-2.78824	0.95113	-2.93151	0.00337319	0.136517	AL078590.2
ENSG00000123989.14	1862.13	1.20895	0.412551	2.93043	0.00338496	0.136517	CHPF
ENSG00000173947.14	253.333	-2.38127	0.812543	-2.93065	0.00338258	0.136517	PIFO
ENSG00000144278.15	306.545	2.33165	0.797026	2.92544	0.00343969	0.138435	GALNT13
ENSG00000248712.7	11.1764	-4.08003	1.39541	-2.92389	0.00345692	0.138838	CCDC153
ENSG00000136108.15	296.075	1.61933	0.554079	2.92257	0.00347161	0.139139	CKAP2
ENSG00000170324.21	38.3803	-2.3903	0.818635	-2.91986	0.00350192	0.139257	FRMPD2
ENSG00000121905.10	123.469	-1.97199	0.675404	-2.91972	0.00350347	0.139257	HPCA
ENSG00000018280.17	1297.67	-1.98808	0.680612	-2.92102	0.00348893	0.139257	SLC11A1
ENSG00000134548.11	15.769	-2.65774	0.910216	-2.9199	0.00350149	0.139257	SPX
ENSG00000154645.14	13.1667	-3.24614	1.11208	-2.91898	0.00351178	0.139301	CHODL
ENSG00000146670.10	134.782	2.11334	0.724281	2.91784	0.00352462	0.139523	CDCA5
ENSG00000281100.1	21.2918	-2.51271	0.861505	-2.91665	0.00353813	0.139771	AC105749.1
ENSG00000265206.5	40.0538	-2.79632	0.959222	-2.9152	0.00355464	0.140136	AC004687.1
ENSG00000267121.6	33.2932	-2.09574	0.719421	-2.91309	0.00357871	0.140216	AC008105.3
ENSG00000177294.7	13.1508	-3.74578	1.28608	-2.91257	0.00358471	0.140216	FBXO39
ENSG00000247095.3	130.975	2.25216	0.773281	2.91248	0.00358576	0.140216	MIR210HG
ENSG00000182902.14	499.846	-1.69676	0.582517	-2.91281	0.00358189	0.140216	SLC25A18
ENSG00000260528.5	129.704	-1.66191	0.57113	-2.90986	0.00361592	0.14054	FAM157C
ENSG00000270765.5	24.8544	-3.90493	1.34142	-2.91105	0.00360214	0.14054	GAS2L2
ENSG00000084628.10	95.1101	2.44947	0.841643	2.91035	0.00361029	0.14054	NKAIN1
ENSG00000107249.23	1664.5	-1.65314	0.568377	-2.90853	0.00363131	0.140571	GLIS3
ENSG00000075043.18	1777.37	1.62624	0.559111	2.90861	0.00363034	0.140571	KCNQ2
ENSG00000286215.1	10.4213	-3.29393	1.1347	-2.90291	0.0036971	0.141868	AL356534.1
ENSG00000010671.15	70.5139	-2.09283	0.72119	-2.90191	0.00370898	0.141868	BTK
ENSG00000165985.10	43.7813	-2.66138	0.916449	-2.90402	0.00368409	0.141868	C1QL3
ENSG00000105699.16	37.6455	-1.68773	0.581505	-2.90236	0.00370368	0.141868	LSR
ENSG00000167207.13	73.1194	-1.96914	0.67814	-2.90373	0.00368742	0.141868	NOD2
ENSG00000112245.12	300.841	1.35581	0.466849	2.90418	0.00368215	0.141868	PTP4A1
ENSG00000142512.15	256.164	-1.97919	0.682757	-2.89882	0.00374569	0.142627	SIGLEC10
ENSG00000158816.15	32.2988	-4.15735	1.43437	-2.89838	0.00375101	0.142627	VWA5B1
ENSG00000273274.2	160.584	1.68946	0.58286	2.89856	0.00374876	0.142627	ZBTB8B
ENSG00000148482.12	74.0816	-2.72693	0.941196	-2.8973	0.00376386	0.142834	SLC39A12
ENSG00000104903.5	72.434	-2.416	0.834498	-2.89516	0.00378967	0.143531	LYL1
ENSG00000171903.16	128.731	-1.45453	0.502667	-2.89363	0.00380815	0.143948	CYP4F11
ENSG00000171791.13	615.941	-1.58398	0.547708	-2.89201	0.00382782	0.144126	BCL2
ENSG00000138670.17	178.493	-1.6035	0.554456	-2.89203	0.0038276	0.144126	RASGEF1B
ENSG00000101665.9	191.491	-1.46979	0.508554	-2.89014	0.00385066	0.144704	SMAD7
ENSG00000149926.13	260.379	2.15252	0.745252	2.88831	0.00387317	0.145266	TLCD3B
ENSG00000118777.12	213.794	-1.46764	0.508531	-2.88604	0.00390128	0.146037	ABCG2
ENSG00000188042.8	1625.18	1.19495	0.414226	2.88479	0.00391678	0.14605	ARL4C
ENSG00000111696.12	579.332	-1.18453	0.410572	-2.88508	0.00391316	0.14605	NT5DC3
ENSG00000115112.8	350.471	-2.67244	0.926597	-2.88414	0.0039248	0.146066	TFCP2L1
ENSG00000075884.14	56.7723	-2.26819	0.786867	-2.88256	0.00394454	0.146236	ARHGAP15
ENSG00000092850.12	55.0117	-2.6328	0.913318	-2.88268	0.00394312	0.146236	TEKT2
ENSG00000105967.16	134.995	-2.17154	0.753685	-2.88123	0.00396123	0.146573	TFEC
ENSG00000105519.17	586.516	-2.68183	0.931065	-2.88039	0.00397187	0.146685	CAPS
ENSG00000164100.9	21.7447	-2.97284	1.03242	-2.87949	0.00398318	0.146822	NDST3
ENSG00000178199.14	40.1379	-2.20168	0.764899	-2.8784	0.00399701	0.14705	ZC3H12D
ENSG00000234354.3	18.5664	2.74681	0.954679	2.87721	0.00401211	0.147325	RPS26P47
ENSG00000081923.14	41.502	-2.15782	0.750198	-2.87634	0.00402318	0.14745	ATP8B1
ENSG00000206190.11	156.304	-1.83345	0.63792	-2.87411	0.00405166	0.147973	ATP10A
ENSG00000179546.4	10.9016	-3.47827	1.21025	-2.87402	0.00405279	0.147973	HTR1D
ENSG00000163219.12	139.48	-2.09264	0.728351	-2.87312	0.00406437	0.148115	ARHGAP25
ENSG00000154263.17	44.9723	-2.78244	0.969881	-2.86885	0.00411972	0.148537	ABCA10
ENSG00000143153.13	1287.95	-1.5947	0.555827	-2.86905	0.00411705	0.148537	ATP1B1
ENSG00000156011.17	1854.24	-1.14705	0.399676	-2.86995	0.00410543	0.148537	PSD3
ENSG00000134419.15	795.651	1.18673	0.413688	2.86866	0.00412217	0.148537	RPS15A
ENSG00000103056.12	237.166	2.29406	0.798969	2.87128	0.00408818	0.148537	SMPD3
ENSG00000204278.12	22.0004	-3.61205	1.25877	-2.8695	0.0041112	0.148537	TMEM235
ENSG00000076826.9	135.018	1.82821	0.637545	2.86758	0.00413622	0.148765	CAMSAP3
ENSG00000184144.12	1079.46	-1.81196	0.632103	-2.86656	0.00414964	0.14897	CNTN2
ENSG00000114757.19	257.871	-2.50471	0.874179	-2.86521	0.00416731	0.149049	PEX5L
ENSG00000168495.13	492.483	1.33577	0.466128	2.86567	0.00416127	0.149049	POLR3D
ENSG00000117228.10	647.483	-1.61125	0.562583	-2.86402	0.00418303	0.149154	GBP1
ENSG00000122574.10	235.486	-1.55509	0.543013	-2.86382	0.00418571	0.149154	WIPF3
ENSG00000141294.10	53.3803	-2.76034	0.964409	-2.8622	0.00420707	0.149638	LRRC46
ENSG00000236279.7	17.9717	-2.20731	0.771808	-2.85992	0.00423753	0.150196	CLEC2L
ENSG00000185130.5	59.4759	2.25338	0.787935	2.85986	0.00423832	0.150196	HIST1H2BL
ENSG00000163531.15	3907.54	-1.16061	0.40597	-2.85886	0.00425162	0.15039	NFASC
ENSG00000138135.7	126.975	-2.50281	0.876008	-2.85707	0.00427572	0.150736	CH25H
ENSG00000125629.15	281.369	1.27846	0.447489	2.85697	0.00427702	0.150736	INSIG2
ENSG00000102043.16	10.7749	-3.03534	1.06347	-2.85418	0.00431484	0.151791	MTMR8
ENSG00000134321.12	197.79	-2.29701	0.805283	-2.85243	0.00433869	0.152167	RSAD2
ENSG00000123473.15	137.686	2.02591	0.710288	2.85223	0.00434132	0.152167	STIL
ENSG00000100181.22	37.3824	-3.04317	1.06732	-2.85124	0.00435494	0.152368	TPTEP1
ENSG00000035664.11	67.9217	-1.83192	0.642709	-2.85032	0.00436756	0.152532	DAPK2
ENSG00000221909.3	102.373	1.47046	0.516151	2.84889	0.00438717	0.15294	FAM200A
ENSG00000272514.6	48.4302	-3.08182	1.0821	-2.848	0.00439944	0.153091	CFAP206
ENSG00000223459.6	270.901	1.67994	0.590022	2.84725	0.00440992	0.153179	TCAF1P1
ENSG00000246203.2	11.3367	-3.16461	1.112	-2.84587	0.00442902	0.153566	AL353807.3
ENSG00000286376.1	12.4897	4.46217	1.56995	2.84224	0.00447979	0.154493	AC006041.2
ENSG00000105383.15	54.2163	-1.76937	0.622304	-2.84326	0.00446542	0.154493	CD33
ENSG00000173588.15	172.219	-1.47229	0.517932	-2.84263	0.00447424	0.154493	CEP83
ENSG00000147036.11	58.423	-2.82675	0.994864	-2.84134	0.00449241	0.154651	LANCL3
ENSG00000249307.7	297.018	-3.31094	1.16712	-2.83685	0.00455607	0.15573	LINC01088
ENSG00000188404.10	51.1137	-2.59243	0.913697	-2.8373	0.00454972	0.15573	SELL
ENSG00000235111.1	15.0056	-3.06495	1.08007	-2.83773	0.00454363	0.15573	Z97192.3
ENSG00000164185.6	43.3856	-2.8726	1.01249	-2.83716	0.00455167	0.15573	ZNF474
ENSG00000147676.14	27.1404	-3.33608	1.17631	-2.83606	0.00456738	0.155841	MAL2
ENSG00000230699.2	24.9894	3.36051	1.18623	2.83294	0.00461226	0.156966	AL645608.2
ENSG00000257842.6	108.27	2.09117	0.738241	2.83263	0.00461664	0.156966	LINC02588
ENSG00000197083.11	20.8811	3.0918	1.09181	2.83181	0.00462856	0.157094	ZNF300P1
ENSG00000048342.16	292.696	-1.40108	0.495066	-2.8301	0.00465339	0.157659	CC2D2A
ENSG00000188542.9	59.5709	1.56332	0.552903	2.82748	0.00469166	0.158498	DUSP28
ENSG00000138378.19	18.1188	-3.26976	1.1565	-2.82728	0.00469459	0.158498	STAT4
ENSG00000250771.2	61.2075	-2.52033	0.891837	-2.826	0.00471331	0.158852	AC106865.1
ENSG00000106034.18	94.9897	-2.40165	0.850378	-2.82421	0.00473966	0.159461	CPED1
ENSG00000167895.14	132.16	-2.31853	0.821298	-2.823	0.00475764	0.159787	TMC8
ENSG00000130413.15	257.536	-1.70977	0.606143	-2.82073	0.00479142	0.160642	STK33
ENSG00000198087.7	246.321	-1.25368	0.444784	-2.81863	0.00482287	0.161415	CD2AP
ENSG00000176619.13	709.29	1.30959	0.464726	2.81798	0.00483271	0.161464	LMNB2
ENSG00000114013.16	120.966	-2.28465	0.811377	-2.81577	0.00486604	0.162277	CD86
ENSG00000235531.10	42.2308	-2.74422	0.974768	-2.81525	0.00487387	0.162277	MSC-AS1
ENSG00000268659.2	13.0291	-3.02275	1.0748	-2.81238	0.00491757	0.162947	AL589863.1
ENSG00000151067.22	737.27	-1.71241	0.609077	-2.81148	0.00493146	0.162947	CACNA1C
ENSG00000083520.15	479.87	1.23304	0.438595	2.81134	0.00493356	0.162947	DIS3
ENSG00000274750.2	94.9604	1.82448	0.649012	2.81117	0.00493624	0.162947	HIST1H3E
ENSG00000153820.13	243.212	2.55223	0.907522	2.81231	0.00491873	0.162947	SPHKAP
ENSG00000142920.17	275.18	-1.49352	0.531403	-2.81053	0.00494607	0.162966	AZIN2
ENSG00000009950.16	90.6666	-1.98659	0.707298	-2.80871	0.00497403	0.162966	MLXIPL
ENSG00000011052.21	33.511	2.06202	0.734014	2.80924	0.00496586	0.162966	NME1-NME2
ENSG00000100599.16	362.171	-1.69565	0.603781	-2.80838	0.00497909	0.162966	RIN3
ENSG00000095970.16	320.875	-2.12633	0.75683	-2.80953	0.00496145	0.162966	TREM2
ENSG00000087116.16	112.77	-2.14246	0.763394	-2.8065	0.00500836	0.163314	ADAMTS2
ENSG00000151725.12	63.4122	1.84866	0.65881	2.80606	0.00501515	0.163314	CENPU
ENSG00000173083.15	62.7384	-1.77796	0.633489	-2.80661	0.00500651	0.163314	HPSE
ENSG00000237686.7	13.636	3.05096	1.08824	2.80358	0.00505389	0.1638	AL109615.3
ENSG00000151834.15	124.262	-2.11608	0.754952	-2.80293	0.00506404	0.1638	GABRA2
ENSG00000114656.12	63.2099	-2.85265	1.01773	-2.80294	0.00506385	0.1638	KIAA1257
ENSG00000164112.13	16.1625	-3.57111	1.27336	-2.80448	0.00503982	0.1638	TMEM155
ENSG00000286522.1	523.959	2.50594	0.894318	2.80206	0.00507769	0.163836	HIST1H3B
ENSG00000223756.6	35.7564	3.73595	1.33342	2.80178	0.00508216	0.163836	TSSC2
ENSG00000170214.5	37.2627	-2.05331	0.733448	-2.79953	0.00511765	0.164705	ADRA1B
ENSG00000169248.13	10.5607	-2.69549	0.963038	-2.79894	0.005127	0.164731	CXCL11
ENSG00000181585.6	72.3368	-2.11428	0.755747	-2.7976	0.00514833	0.165141	TMIE
ENSG00000167261.14	18.9315	-2.74544	0.981861	-2.79616	0.00517132	0.165602	DPEP2
ENSG00000087253.13	247.64	-1.86692	0.668208	-2.79392	0.0052074	0.166481	LPCAT2
ENSG00000134020.8	13.3449	-2.52909	0.906197	-2.79089	0.00525638	0.167769	PEBP4
ENSG00000262712.1	22.474	2.62469	0.941415	2.78803	0.00530295	0.168876	AC012676.1
ENSG00000177807.10	1700.25	-1.44032	0.516812	-2.78694	0.00532091	0.168876	KCNJ10
ENSG00000196562.14	1617.5	1.2702	0.455821	2.78662	0.00532611	0.168876	SULF2
ENSG00000147027.4	556.404	-2.04717	0.734537	-2.78702	0.00531959	0.168876	TMEM47
ENSG00000089558.9	17.3763	2.34763	0.842692	2.78586	0.00533854	0.168992	KCNH4
ENSG00000165572.8	356.086	1.37762	0.494961	2.7833	0.00538096	0.170056	KBTBD6
ENSG00000186231.17	107.405	-2.44542	0.878931	-2.78227	0.00539807	0.170318	KLHL32
ENSG00000171812.13	341.185	-2.25586	0.811077	-2.78131	0.00541405	0.170543	COL8A2
ENSG00000180638.17	264.414	-2.75458	0.991483	-2.77824	0.00546543	0.1716	SLC47A2
ENSG00000132274.16	766.099	-1.66648	0.599757	-2.77859	0.0054596	0.1716	TRIM22
ENSG00000108786.10	58.1818	1.6902	0.609332	2.77386	0.00553952	0.172801	HSD17B1
ENSG00000124507.11	277.216	-2.34638	0.84583	-2.77406	0.00553611	0.172801	PACSIN1
ENSG00000014138.9	153.679	1.48544	0.535648	2.77317	0.00555139	0.172801	POLA2
ENSG00000105894.12	2115.56	1.36775	0.493364	2.7723	0.00556623	0.172801	PTN
ENSG00000173267.14	34.77	-2.64096	0.952333	-2.77315	0.00555166	0.172801	SNCG
ENSG00000173452.13	99.9509	2.90123	1.0462	2.77311	0.00555234	0.172801	TMEM196
ENSG00000168016.14	563.768	-1.46735	0.529291	-2.77228	0.00556643	0.172801	TRANK1
ENSG00000238266.2	66.4275	3.93799	1.42088	2.77151	0.00557976	0.172937	LINC00707
ENSG00000163624.6	55.6095	-1.77612	0.641465	-2.76885	0.00562549	0.173332	CDS1
ENSG00000129295.9	95.4017	-2.02646	0.731812	-2.7691	0.00562106	0.173332	LRRC6
ENSG00000175785.13	402.412	2.23458	0.807095	2.76868	0.00562847	0.173332	PRIMA1
ENSG00000182183.15	15.6868	-2.2856	0.8255	-2.76875	0.00562722	0.173332	SHISAL2A
ENSG00000271503.6	23.8879	-2.06512	0.74717	-2.76392	0.00571118	0.173734	CCL5
ENSG00000008086.12	451.585	-1.39617	0.504518	-2.76734	0.00565154	0.173734	CDKL5
ENSG00000172824.16	87.3889	-2.11507	0.7649	-2.76516	0.00568947	0.173734	CES4A
ENSG00000239961.3	15.5181	-3.25515	1.17784	-2.76366	0.00571567	0.173734	LILRA4
ENSG00000168078.10	66.485	2.01772	0.729704	2.76512	0.00569013	0.173734	PBK
ENSG00000118557.16	28.6313	3.22656	1.16788	2.76275	0.00573164	0.173734	PMFBP1
ENSG00000152784.15	61.962	-2.38701	0.863979	-2.76281	0.0057306	0.173734	PRDM8
ENSG00000171848.15	288.654	2.37541	0.859783	2.7628	0.00573072	0.173734	RRM2
ENSG00000183780.13	25.1895	-2.73041	0.988167	-2.76311	0.00572537	0.173734	SLC35F3
ENSG00000187554.14	73.4028	-2.08698	0.75499	-2.76424	0.0057055	0.173734	TLR5
ENSG00000134323.12	94.4259	1.91796	0.694479	2.76172	0.00574977	0.17401	MYCN
ENSG00000245848.3	322.063	-2.46404	0.892619	-2.76046	0.00577193	0.174134	CEBPA
ENSG00000175874.10	218.297	-2.35574	0.853284	-2.76079	0.00576623	0.174134	CREG2
ENSG00000152137.6	968.599	-1.82643	0.662242	-2.75796	0.00581641	0.175201	HSPB8
ENSG00000095585.16	83.9912	-2.66936	0.968237	-2.75693	0.00583466	0.175203	BLNK
ENSG00000007968.7	81.1149	2.74578	0.995916	2.75703	0.00583282	0.175203	E2F2
ENSG00000250120.8	190.057	-2.46533	0.894798	-2.75518	0.005866	0.175505	PCDHA10
ENSG00000101445.10	367.745	-1.86784	0.678022	-2.75484	0.00587203	0.175505	PPP1R16B
ENSG00000169750.9	86.674	1.56926	0.569448	2.75576	0.00585568	0.175505	RAC3
ENSG00000130830.15	207.663	-1.12085	0.406996	-2.75395	0.00588807	0.175712	MPP1
ENSG00000118307.19	29.6227	-2.40952	0.87554	-2.75204	0.00592257	0.175925	CASC1
ENSG00000081237.20	352.516	-2.14486	0.7792	-2.75264	0.00591162	0.175925	PTPRC
ENSG00000196074.13	56.2313	-1.74063	0.632441	-2.75225	0.00591877	0.175925	SYCP2
ENSG00000197358.9	29.178	2.06285	0.749853	2.751	0.00594135	0.176211	BNIP3P1
ENSG00000250320.6	11.8307	-3.25493	1.18402	-2.74905	0.00597686	0.176992	AC113383.1
ENSG00000112419.14	217.252	-1.35666	0.494053	-2.74598	0.00603303	0.178382	PHACTR2
ENSG00000174125.8	167.34	-1.83499	0.668409	-2.74531	0.00604531	0.178471	TLR1
ENSG00000035499.13	30.1624	2.11903	0.772093	2.74452	0.0060599	0.178628	DEPDC1B
ENSG00000174130.12	111.803	-2.09	0.761882	-2.74321	0.00608426	0.179072	TLR6
ENSG00000161911.11	31.6782	-2.29403	0.838107	-2.73716	0.00619721	0.182119	TREML1
ENSG00000166508.17	714.835	1.3723	0.501545	2.73614	0.00621642	0.182405	MCM7
ENSG00000279041.1	18.3748	-2.77916	1.01604	-2.73527	0.00623283	0.182547	AC102945.2
ENSG00000234104.1	16.6622	4.819	1.76356	2.73254	0.00628478	0.182547	AL133465.1
ENSG00000197766.8	30.2438	-2.2211	0.812876	-2.7324	0.00628753	0.182547	CFD
ENSG00000183690.13	54.3167	-2.3648	0.865346	-2.73279	0.00628013	0.182547	EFHC2
ENSG00000134333.14	2493.03	1.11257	0.407049	2.73326	0.00627099	0.182547	LDHA
ENSG00000152931.8	42.3647	-2.496	0.912992	-2.73386	0.00625957	0.182547	PART1
ENSG00000272391.6	1539.17	1.19381	0.43679	2.73315	0.0062732	0.182547	POM121C
ENSG00000286710.1	61.2072	-1.44118	0.527606	-2.73155	0.00630378	0.182653	AC188617.1
ENSG00000123364.5	10.6897	-4.19726	1.53705	-2.73072	0.00631962	0.182653	HOXC13
ENSG00000068976.14	71.6803	-1.89619	0.694281	-2.73115	0.00631132	0.182653	PYGM
ENSG00000145819.18	881.676	-1.26288	0.462723	-2.72923	0.00634826	0.183206	ARHGAP26
ENSG00000136750.13	144.248	-2.92543	1.07263	-2.72734	0.00638466	0.183981	GAD2
ENSG00000188674.11	72.5497	2.47234	0.906735	2.72664	0.00639837	0.184101	C2orf80
ENSG00000119900.9	2276.14	-1.40819	0.516581	-2.72598	0.00641118	0.184195	OGFRL1
ENSG00000017427.16	68.8469	-2.32881	0.854556	-2.72517	0.00642688	0.184371	IGF1
ENSG00000250011.1	10.7559	-3.76388	1.38299	-2.72155	0.00649771	0.186126	HMGB1P3
ENSG00000094804.12	72.7288	2.02915	0.745998	2.72005	0.00652724	0.186694	CDC6
ENSG00000164199.18	1349.99	-1.91873	0.705637	-2.71915	0.00654504	0.186845	ADGRV1
ENSG00000163393.13	85.6102	-1.52558	0.561122	-2.7188	0.0065519	0.186845	SLC22A15
ENSG00000261616.1	70.2175	-2.66886	0.982115	-2.71747	0.00657838	0.187047	AC036108.3
ENSG00000182179.13	549.114	-1.48935	0.547991	-2.71783	0.00657116	0.187047	UBA7
ENSG00000128512.22	1766.17	-1.07997	0.397533	-2.71667	0.0065942	0.187221	DOCK4
ENSG00000166578.10	27.3864	-2.60171	0.957912	-2.71602	0.00660718	0.187313	IQCD
ENSG00000150773.10	54.6105	-1.97378	0.726948	-2.71516	0.00662446	0.187528	PIH1D2
ENSG00000168843.14	20.4859	-3.35937	1.23765	-2.71431	0.00664136	0.18773	FSTL5
ENSG00000108375.12	18.7294	-3.87045	1.4265	-2.71326	0.00666256	0.188054	RNF43
ENSG00000072832.15	1384.2	1.53191	0.564786	2.71236	0.00668054	0.188286	CRMP1
ENSG00000168528.12	88.6535	2.16257	0.797559	2.71148	0.00669831	0.188511	SERINC2
ENSG00000240498.9	25.6265	-1.98739	0.733143	-2.71079	0.00671237	0.188631	CDKN2B-AS1
ENSG00000267296.2	14.6768	-2.32385	0.857812	-2.70904	0.00674779	0.188957	CEBPA-DT
ENSG00000197769.6	11.6049	-3.30372	1.21951	-2.70906	0.00674748	0.188957	MAP1LC3C
ENSG00000218336.9	189.251	-3.03898	1.12191	-2.70877	0.00675338	0.188957	TENM3
ENSG00000112981.5	49.2867	-1.74231	0.643498	-2.70756	0.00677798	0.189371	NME5
ENSG00000162437.14	273.592	-1.13625	0.419898	-2.70601	0.00680974	0.189983	RAVER2
ENSG00000204899.6	90.0029	1.58163	0.584685	2.70509	0.00682852	0.190231	MZT1
ENSG00000267745.1	13.9592	-2.52858	0.934947	-2.70452	0.00684028	0.190284	AC060766.7
ENSG00000225689.2	16.4309	-2.3307	0.862821	-2.70125	0.00690784	0.190806	AL008633.1
ENSG00000185745.10	373.683	-2.18153	0.80761	-2.70122	0.00690851	0.190806	IFIT1
ENSG00000112038.18	29.6281	-2.60017	0.962463	-2.70158	0.00690104	0.190806	OPRM1
ENSG00000188672.18	15.2182	2.90491	1.07524	2.70164	0.00689979	0.190806	RHCE
ENSG00000186854.11	19.6323	-2.31418	0.856256	-2.70268	0.00687832	0.190806	TRABD2A
ENSG00000005471.17	26.3251	-1.79884	0.666152	-2.70034	0.00692689	0.191039	ABCB4
ENSG00000169933.15	73.2731	-2.59788	0.962639	-2.69871	0.00696083	0.191701	FRMPD4
ENSG00000100342.20	158.815	-2.17444	0.806133	-2.69737	0.006989	0.191929	APOL1
ENSG00000269416.6	17.7743	2.70136	1.00146	2.69742	0.00698796	0.191929	LINC01224
ENSG00000171094.18	350.809	-2.01209	0.746459	-2.69552	0.00702796	0.19199	ALK
ENSG00000164746.14	51.5571	-2.96622	1.10062	-2.69504	0.00703805	0.19199	C7orf57
ENSG00000121310.17	529.971	-1.7132	0.635719	-2.6949	0.00704104	0.19199	ECHDC2
ENSG00000127084.19	105.94	-1.78318	0.66162	-2.69517	0.00703531	0.19199	FGD3
ENSG00000117115.13	1318.46	-1.4468	0.53674	-2.69554	0.00702756	0.19199	PADI2
ENSG00000015592.16	518.615	1.76297	0.654349	2.69424	0.00705495	0.192098	STMN4
ENSG00000182632.15	11.7387	-2.75215	1.02184	-2.69331	0.0070746	0.192105	CCNYL2
ENSG00000272636.4	102.526	-1.79624	0.66705	-2.69282	0.00708512	0.192105	DOC2B
ENSG00000237649.8	111.043	1.94208	0.721176	2.69293	0.00708264	0.192105	KIFC1
ENSG00000197921.6	105.976	2.96188	1.10072	2.69087	0.00712665	0.19296	HES5
ENSG00000226321.5	15.1735	-4.45934	1.65903	-2.68792	0.00718996	0.193857	CROCC2
ENSG00000120549.18	349.154	-1.90563	0.708949	-2.68796	0.00718902	0.193857	KIAA1217
ENSG00000185924.7	35.9735	-2.223	0.826949	-2.68819	0.00718408	0.193857	RTN4RL1
ENSG00000110848.8	45.2016	-2.14495	0.798225	-2.68715	0.00720647	0.194031	CD69
ENSG00000256029.6	75.4173	-1.58003	0.588116	-2.68659	0.00721856	0.194086	AL590560.2
ENSG00000139970.17	1111.09	-1.92562	0.717419	-2.6841	0.00727255	0.194993	RTN1
ENSG00000165480.16	40.992	2.26921	0.845382	2.68425	0.00726933	0.194993	SKA3
ENSG00000183549.10	64.7911	-1.69753	0.63326	-2.68061	0.00734873	0.19625	ACSM5
ENSG00000187840.5	205.965	1.33224	0.496871	2.68126	0.00733464	0.19625	EIF4EBP1
ENSG00000111344.11	34.9396	-1.93794	0.722963	-2.68056	0.00734996	0.19625	RASAL1
ENSG00000156234.7	15.8259	-4.64302	1.73292	-2.67929	0.00737775	0.19672	CXCL13
ENSG00000273797.1	12.438	-2.59312	0.968602	-2.67718	0.00742447	0.197419	AL133445.2
ENSG00000154162.15	13.0292	-3.40433	1.27144	-2.67755	0.00741637	0.197419	CDH12
ENSG00000259234.6	14.3801	-4.15948	1.55448	-2.6758	0.00745518	0.197796	ANKRD34C-AS1
ENSG00000186185.14	164.606	1.91677	0.716385	2.67562	0.00745917	0.197796	KIF18B
ENSG00000078295.17	693.487	-2.10385	0.78695	-2.67342	0.00750812	0.198116	ADCY2
ENSG00000101412.13	143.481	1.46728	0.548863	2.67331	0.00751076	0.198116	E2F1
ENSG00000154478.4	44.6284	-2.97679	1.11318	-2.67414	0.00749216	0.198116	GPR26
ENSG00000147481.17	623.599	1.9373	0.724702	2.67324	0.00751234	0.198116	SNTG1
ENSG00000185974.7	10.7059	3.38561	1.26681	2.67254	0.0075279	0.198255	GRK1
ENSG00000281969.1	55.781	-2.2954	0.859616	-2.67027	0.00757907	0.199331	AL592158.1
ENSG00000182230.12	11.1302	-3.20458	1.20035	-2.66971	0.00759161	0.199388	FAM153B
ENSG00000078053.17	183.269	-1.68764	0.632668	-2.66749	0.00764195	0.199451	AMPH
ENSG00000172244.9	29.9956	1.72012	0.645323	2.66551	0.00768709	0.199451	C5orf34
ENSG00000126787.13	53.5896	2.05875	0.771383	2.6689	0.00760999	0.199451	DLGAP5
ENSG00000115423.18	250.42	-2.88985	1.08287	-2.66869	0.00761475	0.199451	DNAH6
ENSG00000111206.12	264.516	1.84407	0.691368	2.66727	0.00764702	0.199451	FOXM1
ENSG00000102468.10	38.0517	-1.87412	0.702854	-2.66644	0.00766601	0.199451	HTR2A
ENSG00000216866.5	38.0342	1.59417	0.597837	2.66656	0.00766318	0.199451	RPS2P55
ENSG00000137491.15	2131.75	-1.85446	0.695701	-2.6656	0.00768517	0.199451	SLCO2B1
ENSG00000132530.17	641.044	-1.83123	0.686948	-2.66575	0.00768171	0.199451	XAF1
ENSG00000274641.1	149.22	2.26544	0.850212	2.66455	0.00770903	0.199603	HIST1H2BO
ENSG00000119508.18	302.988	-1.93119	0.724826	-2.66435	0.00771366	0.199603	NR4A3
ENSG00000231652.2	18.2815	-2.41229	0.905657	-2.66358	0.0077315	0.199796	AL590428.1
ENSG00000155816.20	1657.1	-1.19817	0.450137	-2.6618	0.00777249	0.200586	FMN2
ENSG00000123836.15	698.224	-1.55875	0.585998	-2.65998	0.00781442	0.201399	PFKFB2
ENSG00000142549.9	230.818	2.2943	0.863233	2.6578	0.00786521	0.201562	IGLON5
ENSG00000140044.13	204.592	-1.51108	0.568492	-2.65805	0.00785942	0.201562	JDP2
ENSG00000130764.10	504.501	1.11386	0.419142	2.65747	0.00787303	0.201562	LRRC47
ENSG00000103710.11	399.696	-2.03434	0.765183	-2.65863	0.00784598	0.201562	RASL12
ENSG00000075035.10	55.4733	-2.58978	0.974419	-2.65777	0.00786596	0.201562	WSCD2
ENSG00000113805.8	36.1637	-2.84179	1.07066	-2.65425	0.00794845	0.203079	CNTN3
ENSG00000120457.12	71.9159	-2.11456	0.796731	-2.65404	0.00795336	0.203079	KCNJ5
ENSG00000018236.15	1099.91	-1.75188	0.660291	-2.65319	0.00797353	0.203325	CNTN1
ENSG00000280614.1	49.275	-8.20766	3.09468	-2.65218	0.00799733	0.203663	FP236383.4
ENSG00000270149.5	38.0458	3.45002	1.30232	2.64912	0.00807007	0.203903	AL591806.4
ENSG00000137628.17	375.013	-1.68198	0.634922	-2.64912	0.00807025	0.203903	DDX60
ENSG00000257185.2	51.2213	2.40491	0.907378	2.65039	0.00803979	0.203903	LINC02293
ENSG00000178460.18	11.1372	-3.04836	1.14977	-2.65129	0.00801855	0.203903	MCMDC2
ENSG00000130876.11	13.2987	-3.72786	1.40711	-2.6493	0.00806587	0.203903	SLC7A10
ENSG00000073849.15	1129.47	-1.8458	0.696407	-2.65047	0.00803806	0.203903	ST6GAL1
ENSG00000107562.16	164.86	-2.27087	0.857864	-2.64712	0.00811796	0.204069	CXCL12
ENSG00000105464.3	104.107	1.56062	0.589288	2.64831	0.00808956	0.204069	GRIN2D
ENSG00000176658.17	168.641	-1.46158	0.552149	-2.64707	0.00811915	0.204069	MYO1D
ENSG00000109501.13	623.9	-1.05871	0.399833	-2.64788	0.00809983	0.204069	WFS1
ENSG00000213088.12	107.809	-2.60406	0.984704	-2.64451	0.00818099	0.204309	ACKR1
ENSG00000158373.8	258.517	1.65608	0.62655	2.64317	0.00821349	0.204309	HIST1H2BD
ENSG00000232629.9	74.9943	-2.7259	1.03126	-2.64327	0.0082109	0.204309	HLA-DQB2
ENSG00000267586.7	25.6399	-2.94081	1.11251	-2.64341	0.00820758	0.204309	LINC00907
ENSG00000153208.17	320.225	-1.29523	0.489808	-2.64437	0.00818431	0.204309	MERTK
ENSG00000116649.10	309.028	1.30634	0.493956	2.64465	0.00817759	0.204309	SRM
ENSG00000164674.15	52.3263	-1.6209	0.612631	-2.6458	0.00814989	0.204309	SYTL3
ENSG00000165633.13	214.397	-1.21516	0.459385	-2.64519	0.00816441	0.204309	VSTM4
ENSG00000173193.15	1937.62	-1.49187	0.564593	-2.64238	0.00823245	0.204517	PARP14
ENSG00000171490.13	735.287	1.27524	0.483569	2.63715	0.00836065	0.207434	RSL1D1
ENSG00000197261.11	63.0999	-2.40434	0.912125	-2.63598	0.00838953	0.207617	C6orf141
ENSG00000169385.3	17.4983	-2.2123	0.839137	-2.6364	0.00837915	0.207617	RNASE2
ENSG00000089685.15	141.918	2.20966	0.83847	2.63535	0.00840498	0.207633	BIRC5
ENSG00000134326.11	183.889	-2.10613	0.799362	-2.63476	0.00841963	0.207633	CMPK2
ENSG00000106615.10	503.392	1.26857	0.481512	2.63455	0.00842492	0.207633	RHEB
ENSG00000161888.11	77.144	1.78843	0.678925	2.63421	0.00843329	0.207633	SPC24
ENSG00000112782.18	23.0899	-2.20891	0.839225	-2.63208	0.00848637	0.208674	CLIC5
ENSG00000081803.16	190.441	-2.00371	0.761842	-2.63008	0.00853638	0.209369	CADPS2
ENSG00000106125.14	196.533	-1.52484	0.579753	-2.63015	0.00853469	0.209369	MINDY4
ENSG00000140968.11	135.921	-2.01158	0.765	-2.62952	0.00855061	0.209452	IRF8
ENSG00000079819.19	1426.86	-1.28843	0.490267	-2.62801	0.00858856	0.210056	EPB41L2
ENSG00000174740.8	15.675	-3.66946	1.39647	-2.62767	0.00859707	0.210056	PABPC5
ENSG00000105877.18	153.795	-2.7019	1.02871	-2.62649	0.00862704	0.210522	DNAH11
ENSG00000125966.10	276.128	2.04366	0.778561	2.62492	0.00866692	0.211227	MMP24
ENSG00000172296.13	52.6563	-2.28581	0.871511	-2.62281	0.00872081	0.212272	SPTLC3
ENSG00000264635.1	11.6772	-2.76366	1.05419	-2.62161	0.00875166	0.212713	AP001020.2
ENSG00000164303.11	57.8386	-2.42534	0.925262	-2.62124	0.00876099	0.212713	ENPP6
ENSG00000135905.19	788.828	-1.56374	0.596959	-2.61952	0.00880537	0.213522	DOCK10
ENSG00000165474.8	142.322	2.85194	1.08938	2.61794	0.00884622	0.213706	GJB2
ENSG00000197442.10	420.351	-1.27633	0.487511	-2.61806	0.00884323	0.213706	MAP3K5
ENSG00000255717.7	294.189	1.34465	0.513473	2.61874	0.00882561	0.213706	SNHG1
ENSG00000185736.16	91.8432	-3.07227	1.17437	-2.61611	0.00889375	0.213848	ADARB2
ENSG00000184349.13	65.1524	-2.41376	0.922696	-2.61599	0.00889695	0.213848	EFNA5
ENSG00000147874.11	277.072	1.24479	0.4758	2.6162	0.00889154	0.213848	HAUS6
ENSG00000198910.14	982.513	2.42303	0.926382	2.61558	0.00890756	0.213848	L1CAM
ENSG00000242265.5	2319.39	1.91061	0.730431	2.61573	0.00890375	0.213848	PEG10
ENSG00000128285.4	190.975	1.81771	0.695289	2.61433	0.00894031	0.214367	MCHR1
ENSG00000183914.14	102.134	-3.059	1.1706	-2.6132	0.00896999	0.214812	DNAH2
ENSG00000047597.7	26.1372	-2.62995	1.00684	-2.61207	0.00899949	0.215251	XK
ENSG00000015133.19	110.291	-1.84663	0.708146	-2.6077	0.00911536	0.216145	CCDC88C
ENSG00000111665.11	62.1637	1.70108	0.651905	2.60939	0.00907027	0.216145	CDCA3
ENSG00000197930.13	657.867	1.35391	0.519136	2.60801	0.00910707	0.216145	ERO1A
ENSG00000225964.6	37.4851	-3.54597	1.35933	-2.60861	0.00909106	0.216145	NRIR
ENSG00000187953.10	256.717	1.52509	0.584827	2.60776	0.00911363	0.216145	PMS2CL
ENSG00000224940.8	113.422	2.54455	0.975175	2.60933	0.00907198	0.216145	PRRT4
ENSG00000101255.11	272.648	1.90013	0.728287	2.60904	0.00907977	0.216145	TRIB3
ENSG00000270661.1	11.9528	-2.49499	0.957149	-2.60669	0.00914217	0.216514	Z99289.2
ENSG00000101438.4	37.7414	-2.25852	0.866762	-2.60569	0.00916885	0.21688	SLC32A1
ENSG00000169744.13	118.086	-1.57316	0.604124	-2.60404	0.00921317	0.217129	LDB2
ENSG00000102996.5	444.315	2.03371	0.780876	2.60439	0.00920384	0.217129	MMP15
ENSG00000121152.10	81.0671	2.12279	0.81497	2.60475	0.00919415	0.217129	NCAPH
ENSG00000197153.4	76.439	2.46846	0.948106	2.60357	0.00922581	0.217161	HIST1H3J
ENSG00000247735.2	26.4559	2.33457	0.898234	2.59906	0.00934785	0.217704	AC120114.1
ENSG00000067842.17	77.8386	-2.17645	0.837561	-2.59855	0.00936177	0.217704	ATP2B3
ENSG00000134830.6	74.0863	-2.43756	0.937513	-2.60002	0.00932176	0.217704	C5AR2
ENSG00000013725.14	18.7336	-3.22374	1.24057	-2.5986	0.00936059	0.217704	CD6
ENSG00000082074.18	461.807	-2.14704	0.826209	-2.59867	0.00935863	0.217704	FYB1
ENSG00000113368.12	277.441	1.831	0.704364	2.59951	0.00933578	0.217704	LMNB1
ENSG00000089127.13	355.959	-2.03153	0.781482	-2.59959	0.00933358	0.217704	OAS1
ENSG00000101222.12	77.5698	-2.56009	0.983972	-2.60179	0.00927386	0.217704	SPEF1
ENSG00000166046.11	289.131	-1.47434	0.566708	-2.60159	0.00927923	0.217704	TCP11L2
ENSG00000164761.9	37.0224	-2.01754	0.77562	-2.6012	0.00928987	0.217704	TNFRSF11B
ENSG00000112936.19	72.0594	-3.02172	1.1633	-2.59754	0.00938946	0.217822	C7
ENSG00000141404.16	61.8946	-2.3179	0.892313	-2.59764	0.00938678	0.217822	GNAL
ENSG00000004468.13	170.372	-1.16075	0.446961	-2.59699	0.00940446	0.217908	CD38
ENSG00000279176.1	32.5013	-1.92339	0.74106	-2.59545	0.00944664	0.218622	AC079316.2
ENSG00000148655.15	61.3756	-2.33273	0.899177	-2.59429	0.00947866	0.2191	LRMDA
ENSG00000140955.10	12.9623	-2.52591	0.973964	-2.59343	0.00950227	0.219294	ADAD2
ENSG00000206337.11	198.286	-1.79203	0.69106	-2.59316	0.00950978	0.219294	HCP5
ENSG00000150594.7	23.2812	-1.87909	0.725395	-2.59043	0.0095855	0.220776	ADRA2A
ENSG00000154856.13	459.449	-1.36393	0.526764	-2.58926	0.00961812	0.221263	APCDD1
ENSG00000117650.13	29.1245	2.05194	0.79269	2.58858	0.00963716	0.221436	NEK2
ENSG00000206052.11	79.9916	-1.98328	0.767374	-2.5845	0.00975203	0.22178	DOK6
ENSG00000157851.17	1498.22	1.38995	0.537317	2.58684	0.00968608	0.22178	DPYSL5
ENSG00000187942.12	30.2012	-3.65873	1.41638	-2.58315	0.00979015	0.22178	LDLRAD2
ENSG00000250490.1	16.979	-2.31579	0.896397	-2.58344	0.00978206	0.22178	LINC02145
ENSG00000182175.14	3175.34	-1.15463	0.446729	-2.58462	0.00974856	0.22178	RGMA
ENSG00000129667.12	485.62	-1.57879	0.611036	-2.5838	0.00977189	0.22178	RHBDF2
ENSG00000140988.16	2841.08	1.03399	0.40002	2.58484	0.00974233	0.22178	RPS2
ENSG00000182199.11	617.851	1.24965	0.48298	2.58737	0.0096713	0.22178	SHMT2
ENSG00000146950.13	535.206	1.74058	0.673378	2.58484	0.00974229	0.22178	SHROOM2
ENSG00000146409.12	201.906	-1.21958	0.471684	-2.58558	0.00972149	0.22178	SLC18B1
ENSG00000119283.15	178.917	2.76709	1.06996	2.58615	0.00970543	0.22178	TRIM67
ENSG00000136247.14	386.125	1.15163	0.44565	2.58416	0.00976176	0.22178	ZDHHC4
ENSG00000167723.14	84.0922	-1.67238	0.647578	-2.58251	0.00980846	0.221934	TRPV3
ENSG00000142149.9	79.9941	1.76358	0.683076	2.58182	0.00982817	0.222119	HUNK
ENSG00000282572.2	22.8157	-2.56824	0.99547	-2.57993	0.00988207	0.222167	AC215522.2
ENSG00000080166.16	80.9136	2.03759	0.789534	2.58075	0.00985858	0.222167	DCT
ENSG00000145721.12	400.019	-1.83815	0.712129	-2.58121	0.00984555	0.222167	LIX1
ENSG00000145569.6	147.019	-2.05856	0.797856	-2.58011	0.00987691	0.222167	OTULINL
ENSG00000091844.8	205.637	1.455	0.564015	2.57972	0.00988791	0.222167	RGS17
ENSG00000157368.10	57.5298	-1.911	0.741079	-2.57868	0.00991794	0.222323	IL34
ENSG00000281327.2	19.7395	-2.26317	0.877594	-2.57883	0.0099135	0.222323	LINC01338
ENSG00000285051.2	15.6941	-2.69567	1.04568	-2.5779	0.00994018	0.222563	SLC7A14-AS1
ENSG00000277954.1	34.4237	-1.80694	0.701822	-2.57464	0.0100346	0.223962	AC092376.2
ENSG00000174469.23	193.143	-1.90532	0.740409	-2.57334	0.0100724	0.223962	CNTNAP2
ENSG00000185352.8	161.421	-1.87156	0.726741	-2.57528	0.0100158	0.223962	HS6ST3
ENSG00000112232.9	22.2516	-2.88674	1.12161	-2.57375	0.0100603	0.223962	KHDRBS2
ENSG00000255622.3	84.1375	-1.70376	0.662015	-2.57359	0.0100649	0.223962	PCDHB17P
ENSG00000185634.12	215.871	1.41993	0.551527	2.57453	0.0100375	0.223962	SHC4
ENSG00000130222.11	77.2693	1.90606	0.741414	2.57085	0.0101449	0.224802	GADD45G
ENSG00000143228.13	32.1117	1.71802	0.668085	2.57155	0.0101243	0.224802	NUF2
ENSG00000167202.11	662.267	-1.30885	0.509114	-2.57084	0.0101451	0.224802	TBC1D2B
ENSG00000168959.14	179.889	-2.09089	0.813604	-2.56991	0.0101725	0.224987	GRM5
ENSG00000134955.11	224.098	-1.62289	0.631534	-2.56976	0.0101768	0.224987	SLC37A2
ENSG00000259462.3	17.6115	-2.37875	0.926041	-2.56873	0.0102071	0.225399	CPEB1-AS1
ENSG00000172817.4	81.8057	-1.70556	0.664708	-2.56588	0.0102915	0.225711	CYP7B1
ENSG00000117226.12	197.943	-1.48273	0.577595	-2.56708	0.0102558	0.225711	GBP3
ENSG00000279082.4	49.595	-2.42181	0.943783	-2.56607	0.0102858	0.225711	LINC01727
ENSG00000137642.13	4920.6	-1.38753	0.540756	-2.56591	0.0102907	0.225711	SORL1
ENSG00000277734.8	13.8102	-2.65247	1.03337	-2.56681	0.0102639	0.225711	TRAC
ENSG00000213967.11	58.5714	1.54829	0.603142	2.56705	0.0102569	0.225711	ZNF726
ENSG00000121281.12	575.488	-1.41263	0.55076	-2.56487	0.0103216	0.22579	ADCY7
ENSG00000255236.3	10.8007	3.4228	1.33435	2.56514	0.0103133	0.22579	AP002992.1
ENSG00000114654.7	20.2372	-3.03856	1.185	-2.56418	0.010342	0.22579	EFCC1
ENSG00000230269.7	19.2936	2.80863	1.09528	2.5643	0.0103384	0.22579	LINC02525
ENSG00000168685.15	60.8905	-2.50521	0.97763	-2.56253	0.0103912	0.226609	IL7R
ENSG00000140873.16	37.2297	-2.60197	1.01627	-2.56032	0.0104575	0.227797	ADAMTS18
ENSG00000104894.12	176.47	-2.18971	0.855917	-2.55832	0.0105179	0.22806	CD37
ENSG00000158292.7	246.67	2.49542	0.975075	2.55921	0.010491	0.22806	GPR153
ENSG00000115919.15	56.2485	-2.01165	0.786238	-2.55858	0.0105101	0.22806	KYNU
ENSG00000101057.16	133.092	2.13534	0.834782	2.55796	0.0105288	0.22806	MYBL2
ENSG00000124212.6	143.661	2.28002	0.891337	2.55798	0.0105283	0.22806	PTGIS
ENSG00000129910.8	14.0197	3.14546	1.23092	2.55538	0.0106073	0.228127	CDH15
ENSG00000156206.14	15.8745	-3.13899	1.22833	-2.55549	0.0106038	0.228127	CFAP161
ENSG00000170370.12	29.2437	-2.32776	0.910871	-2.55553	0.0106025	0.228127	EMX2
ENSG00000278677.1	146.844	1.84455	0.722049	2.5546	0.0106309	0.228127	HIST1H2AM
ENSG00000101096.20	380.318	-1.79631	0.702813	-2.55588	0.0105918	0.228127	NFATC2
ENSG00000116251.11	657.506	0.989155	0.387242	2.55436	0.0106383	0.228127	RPL22
ENSG00000130540.14	111.219	-1.96444	0.768638	-2.55574	0.0105963	0.228127	SULT4A1
ENSG00000101463.6	221.888	-1.37345	0.537473	-2.55538	0.0106073	0.228127	SYNDIG1
ENSG00000095587.9	19.7717	-2.18843	0.856619	-2.55473	0.010627	0.228127	TLL2
ENSG00000198042.11	246.191	1.14896	0.449953	2.55351	0.0106644	0.228431	MAK16
ENSG00000126583.11	54.5519	-2.35782	0.923649	-2.55272	0.0106884	0.228691	PRKCG
ENSG00000272610.1	26.4968	-2.02388	0.793143	-2.55172	0.0107192	0.229097	MAGI1-IT1
ENSG00000197756.10	1389.56	1.00087	0.392366	2.55086	0.0107458	0.229207	RPL37A
ENSG00000005020.13	421.837	-1.82602	0.715866	-2.55078	0.0107482	0.229207	SKAP2
ENSG00000163431.13	85.7414	-2.04704	0.803043	-2.5491	0.0108	0.230057	LMOD1
ENSG00000125845.7	133.693	1.49825	0.587938	2.54832	0.0108243	0.230068	BMP2
ENSG00000135426.16	24.0699	-2.83059	1.11076	-2.54833	0.0108241	0.230068	TESPA1
ENSG00000188760.10	188.257	1.393	0.547025	2.5465	0.0108809	0.231016	TMEM198
ENSG00000286423.1	10.6826	-3.53619	1.38895	-2.54594	0.0108985	0.231128	AC004817.5
ENSG00000112837.17	41.9973	-2.51819	0.989249	-2.54556	0.0109102	0.231128	TBX18
ENSG00000279674.1	12.9299	-3.1126	1.22413	-2.54271	0.0109996	0.231582	AC123769.1
ENSG00000142609.18	60.0481	-2.90291	1.14151	-2.54303	0.0109895	0.231582	CFAP74
ENSG00000171962.18	159.355	-2.1341	0.839117	-2.54326	0.0109822	0.231582	DRC3
ENSG00000116670.15	250.09	1.65487	0.650401	2.54439	0.010947	0.231582	MAD2L2
ENSG00000137804.14	129.382	1.69701	0.667465	2.54248	0.011007	0.231582	NUSAP1
ENSG00000120594.17	1531.77	-1.94845	0.766567	-2.54179	0.0110287	0.231582	PLXDC2
ENSG00000163536.12	91.7244	-1.99228	0.784022	-2.5411	0.0110503	0.231582	SERPINI1
ENSG00000067066.17	442.124	-1.58538	0.623819	-2.5414	0.0110409	0.231582	SP100
ENSG00000196715.7	593.007	1.07266	0.422095	2.54127	0.011045	0.231582	VKORC1L1
ENSG00000158023.10	202.793	-1.99788	0.786238	-2.54106	0.0110517	0.231582	WDR66
ENSG00000235597.2	98.154	1.9061	0.750512	2.53974	0.0110936	0.231955	LINC01102
ENSG00000049541.11	194.126	1.23669	0.486867	2.5401	0.011082	0.231955	RFC2
ENSG00000198824.7	358.152	1.25092	0.492916	2.53779	0.0111554	0.232995	CHAMP1
ENSG00000164691.17	137.784	-2.425	0.956262	-2.53592	0.0112153	0.233992	TAGAP
ENSG00000205885.7	112.974	-1.49974	0.591542	-2.53531	0.0112347	0.234016	C1RL-AS1
ENSG00000159259.8	66.4024	1.54759	0.610458	2.53512	0.0112407	0.234016	CHAF1B
ENSG00000146233.8	11.3474	-3.37159	1.33096	-2.53321	0.0113025	0.234794	CYP39A1
ENSG00000172349.17	143.839	-1.73965	0.686657	-2.5335	0.0112929	0.234794	IL16
ENSG00000234775.2	17.3885	-2.65827	1.04972	-2.53235	0.01133	0.235114	AC105940.2
ENSG00000064300.9	392.079	1.63804	0.64697	2.53186	0.011346	0.235191	NGFR
ENSG00000254087.8	281.274	-1.64596	0.650673	-2.52964	0.0114181	0.236432	LYN
ENSG00000247081.8	356.195	-2.0451	0.808726	-2.52879	0.0114455	0.236746	BAALC-AS1
ENSG00000101447.15	47.5249	1.98937	0.787328	2.52674	0.0115126	0.237519	FAM83D
ENSG00000267278.6	22.5233	2.52328	0.99872	2.52652	0.0115199	0.237519	MAP3K14-AS1
ENSG00000154548.9	71.4757	1.48655	0.588359	2.5266	0.0115174	0.237519	SRSF12
ENSG00000241563.3	12.8614	-3.17875	1.25995	-2.52291	0.0116389	0.239205	CORT
ENSG00000133106.14	133.48	-2.39759	0.950291	-2.52301	0.0116355	0.239205	EPSTI1
ENSG00000118495.19	74.7607	-1.77078	0.701822	-2.52311	0.0116321	0.239205	PLAGL1
ENSG00000239969.5	19.778	2.33115	0.925061	2.52	0.0117355	0.240022	AC091390.4
ENSG00000141480.18	463.666	-1.20313	0.477465	-2.51984	0.0117409	0.240022	ARRB2
ENSG00000119938.9	371.342	2.11486	0.838916	2.52094	0.0117041	0.240022	PPP1R3C
ENSG00000204387.14	322.405	1.05414	0.41828	2.52017	0.01173	0.240022	SNHG32
ENSG00000088325.16	273.72	1.60772	0.637809	2.52068	0.0117127	0.240022	TPX2
ENSG00000104081.14	180.31	-2.09023	0.829849	-2.51881	0.0117751	0.240059	BMF
ENSG00000150995.19	844.456	-1.32156	0.524708	-2.51867	0.0117801	0.240059	ITPR1
ENSG00000117394.23	1408.11	1.01104	0.401326	2.51925	0.0117606	0.240059	SLC2A1
ENSG00000185862.7	62.0772	-1.73294	0.68841	-2.51731	0.0118254	0.240306	EVI2B
ENSG00000106462.10	183.132	1.631	0.647946	2.51719	0.0118296	0.240306	EZH2
ENSG00000077152.11	25.6055	1.96118	0.779079	2.51731	0.0118254	0.240306	UBE2T
ENSG00000109321.11	15.5228	-4.03646	1.60446	-2.51578	0.0118768	0.241012	AREG
ENSG00000149554.13	101.955	1.43282	0.570207	2.51281	0.0119773	0.242796	CHEK1
ENSG00000135750.15	63.527	-1.82969	0.728441	-2.51179	0.0120122	0.243246	KCNK1
ENSG00000104518.11	296.129	-1.45899	0.581198	-2.51032	0.0120621	0.244001	GSDMD
ENSG00000130643.9	68.0929	-1.90662	0.759897	-2.50905	0.0121056	0.244625	CALY
ENSG00000186815.12	968.985	-1.22079	0.486698	-2.50831	0.0121311	0.244883	TPCN1
ENSG00000107968.10	136.91	-1.80834	0.721695	-2.50568	0.0122215	0.24645	MAP3K8
ENSG00000140057.9	18.7235	-2.88985	1.15385	-2.50453	0.0122615	0.246999	AK7
ENSG00000173894.11	85.6458	1.55492	0.621603	2.50148	0.0123677	0.248358	CBX2
ENSG00000248485.2	41.0929	-1.96345	0.784807	-2.50182	0.0123557	0.248358	PCP4L1
ENSG00000140090.17	297.292	-2.38956	0.955053	-2.50202	0.0123489	0.248358	SLC24A4
ENSG00000177173.5	16.6159	-1.96597	0.786901	-2.49837	0.0124766	0.249773	NAP1L4P1
ENSG00000137841.12	471.705	-2.05942	0.824309	-2.49836	0.012477	0.249773	PLCB2
ENSG00000197471.12	111.595	-1.89253	0.75732	-2.49898	0.0124552	0.249773	SPN
ENSG00000255439.6	25.5817	-3.51009	1.40609	-2.49634	0.0125483	0.250161	AC135050.2
ENSG00000115163.15	24.4681	2.16188	0.865956	2.49652	0.0125418	0.250161	CENPA
ENSG00000134533.6	18.1583	-2.95422	1.1833	-2.49659	0.0125394	0.250161	RERG
ENSG00000178381.11	137.407	1.26189	0.505339	2.49711	0.0125209	0.250161	ZFAND2A
ENSG00000137819.14	24.2616	-2.37008	0.950065	-2.49465	0.0126083	0.251098	PAQR5
ENSG00000070961.15	839.021	-1.40622	0.563805	-2.49416	0.0126257	0.251186	ATP2B1
ENSG00000175352.11	90.3475	-1.58703	0.636857	-2.49197	0.0127037	0.252477	NRIP3
ENSG00000238230.2	93.0619	-1.89789	0.762342	-2.48956	0.0127903	0.253413	LINC00391
ENSG00000159899.14	223.864	1.17811	0.473166	2.48985	0.0127796	0.253413	NPR2
ENSG00000185551.15	366.711	-1.82457	0.73278	-2.48993	0.0127767	0.253413	NR2F2
ENSG00000169252.5	46.5559	-2.05149	0.824225	-2.489	0.0128104	0.253552	ADRB2
ENSG00000169064.12	74.6163	-5.4455	2.18854	-2.48818	0.0128397	0.253871	ZBBX
ENSG00000104043.14	203.741	-2.02608	0.814711	-2.48687	0.0128871	0.25433	ATP8B4
ENSG00000101203.16	852.111	2.55368	1.02689	2.48681	0.0128893	0.25433	COL20A1
ENSG00000162670.11	174.899	-1.57988	0.635408	-2.48641	0.012904	0.25436	BRINP3
ENSG00000107719.9	779.144	-1.63952	0.659495	-2.48602	0.012918	0.254375	PALD1
ENSG00000140368.13	44.2407	-1.52449	0.613337	-2.48557	0.0129345	0.25444	PSTPIP1
ENSG00000257524.6	91.2815	-1.58422	0.637725	-2.48418	0.012985	0.255173	AL157935.2
ENSG00000205181.7	319.297	1.61579	0.650629	2.48344	0.0130122	0.255187	LINC00654
ENSG00000156299.13	826.885	-1.09445	0.440672	-2.48359	0.0130066	0.255187	TIAM1
ENSG00000231890.8	18.3796	2.33876	0.942196	2.48224	0.013056	0.255429	DARS-AS1
ENSG00000149503.13	337.903	1.17543	0.473481	2.48253	0.0130455	0.255429	INCENP
ENSG00000139220.16	315.034	-1.88536	0.759609	-2.48201	0.0130643	0.255429	PPFIA2
ENSG00000126016.15	567.332	-1.25708	0.506884	-2.48002	0.0131376	0.256405	AMOT
ENSG00000256043.3	365.709	-1.36509	0.550454	-2.47993	0.0131408	0.256405	CTSO
ENSG00000170915.9	912.766	-1.62994	0.657405	-2.47936	0.0131619	0.256558	PAQR8
ENSG00000154027.19	282.608	-2.06545	0.83399	-2.47658	0.0132647	0.256771	AK5
ENSG00000228477.1	20.2236	-1.88754	0.762089	-2.4768	0.0132568	0.256771	AL663070.1
ENSG00000261801.6	20.1719	-2.55259	1.0308	-2.47631	0.013275	0.256771	LOXL1-AS1
ENSG00000128833.13	136.847	-1.47196	0.594118	-2.47756	0.0132283	0.256771	MYO5C
ENSG00000249437.7	496.443	-1.35	0.545149	-2.47638	0.0132721	0.256771	NAIP
ENSG00000185737.13	64.8471	-2.08572	0.841972	-2.47718	0.0132423	0.256771	NRG3
ENSG00000153404.14	19.4878	-2.3406	0.944514	-2.4781	0.0132085	0.256771	PLEKHG4B
ENSG00000162924.14	519.822	-0.996507	0.402494	-2.47583	0.0132927	0.256771	REL
ENSG00000161016.17	2081.26	0.989443	0.399601	2.47608	0.0132834	0.256771	RPL8
ENSG00000151474.23	667.3	-1.4066	0.568401	-2.47466	0.0133363	0.257097	FRMD4A
ENSG00000145491.12	19.6726	-3.26001	1.31732	-2.47474	0.0133335	0.257097	ROPN1L
ENSG00000219481.10	1103.95	1.26729	0.512338	2.47354	0.0133784	0.257651	NBPF1
ENSG00000006128.12	39.7649	-2.73091	1.10459	-2.47233	0.0134235	0.258261	TAC1
ENSG00000283041.1	388.937	1.0361	0.419261	2.47125	0.013464	0.258536	AC008038.1
ENSG00000160957.13	125.964	1.47066	0.59511	2.47124	0.0134646	0.258536	RECQL4
ENSG00000123485.12	80.186	1.75937	0.712309	2.46996	0.0135129	0.258949	HJURP
ENSG00000213801.4	19.2942	-1.87658	0.759712	-2.47012	0.0135068	0.258949	ZNF321P
ENSG00000230587.2	35.5585	-1.95547	0.791949	-2.46919	0.0135418	0.259245	LINC02580
ENSG00000149548.15	73.195	1.57909	0.639966	2.46746	0.0136077	0.260247	CCDC15
ENSG00000281501.1	56.7575	-1.65836	0.672313	-2.46665	0.0136382	0.260572	SEPSECS-AS1
ENSG00000262484.1	27.2352	2.34945	0.953007	2.4653	0.0136898	0.260943	CCER2
ENSG00000254772.10	2313.09	1.02945	0.417612	2.46508	0.0136982	0.260943	EEF1G
ENSG00000099994.11	142.331	1.87198	0.759359	2.46521	0.0136934	0.260943	SUSD2
ENSG00000156140.10	57.8816	-1.83283	0.74407	-2.46325	0.0137685	0.261574	ADAMTS3
ENSG00000105122.13	83.3064	-2.04007	0.828322	-2.46289	0.0137822	0.261574	RASAL3
ENSG00000106399.11	86.4671	1.47514	0.598968	2.4628	0.0137856	0.261574	RPA3
ENSG00000059377.17	185.524	-1.48082	0.601026	-2.46382	0.0137465	0.261574	TBXAS1
ENSG00000121931.16	229.491	1.25301	0.509019	2.46162	0.013831	0.262176	LRIF1
ENSG00000203852.3	350.171	1.91345	0.778273	2.45858	0.0139487	0.26315	HIST2H3A
ENSG00000152936.10	23.6311	-2.45854	1	-2.45853	0.0139506	0.26315	LMNTD1
ENSG00000012223.13	3039.05	-5.80837	2.36182	-2.45928	0.0139216	0.26315	LTF
ENSG00000165055.15	540.122	1.11074	0.45171	2.45897	0.0139335	0.26315	METTL2B
ENSG00000163072.15	33.9058	-1.57614	0.640909	-2.45922	0.0139238	0.26315	NOSTRIN
ENSG00000159409.15	331.438	1.98998	0.809723	2.45761	0.0139866	0.263388	CELF3
ENSG00000122952.17	52.2322	1.72667	0.70261	2.45751	0.0139905	0.263388	ZWINT
ENSG00000237248.5	18.5566	-1.84123	0.749424	-2.45686	0.0140158	0.263606	LINC00987
ENSG00000080503.24	1211.6	-1.22231	0.497835	-2.45525	0.0140787	0.264531	SMARCA2
ENSG00000198221.10	22.7433	2.53147	1.03179	2.45348	0.0141481	0.265576	AFDN-DT
ENSG00000198879.11	583.74	-1.59644	0.650966	-2.45241	0.0141901	0.266106	SFMBT2
ENSG00000197728.11	128.548	1.26374	0.51538	2.45206	0.014204	0.266108	RPS26
ENSG00000175906.5	71.8086	1.61746	0.659876	2.45115	0.01424	0.266523	ARL4D
ENSG00000225331.1	10.2478	-2.48143	1.01271	-2.45029	0.0142741	0.266643	LINC01678
ENSG00000146842.17	445.562	1.05177	0.429238	2.45032	0.0142729	0.266643	TMEM209
ENSG00000172336.5	173.208	1.25958	0.514146	2.44985	0.0142915	0.26671	POP7
ENSG00000188315.8	98.6351	-1.27822	0.521994	-2.44872	0.0143363	0.267288	C3orf62
ENSG00000029559.7	83.187	-2.46243	1.0063	-2.44702	0.0144042	0.268295	IBSP
ENSG00000104147.9	11.9025	2.84324	1.16222	2.44639	0.0144296	0.268507	OIP5
ENSG00000175344.18	44.656	-1.98252	0.810883	-2.44489	0.0144897	0.268564	CHRNA7
ENSG00000188243.12	124.491	1.08336	0.443001	2.44549	0.0144655	0.268564	COMMD6
ENSG00000177602.5	27.222	1.95186	0.798447	2.44457	0.0145023	0.268564	HASPIN
ENSG00000231473.3	10.5538	2.79632	1.14357	2.44527	0.0144745	0.268564	RB1-DT
ENSG00000172687.13	66.0571	1.20167	0.491335	2.44572	0.0144564	0.268564	ZNF738
ENSG00000197748.12	119.583	-2.53803	1.03857	-2.44378	0.0145341	0.268895	CFAP43
ENSG00000163491.16	63.1926	-1.64894	0.674883	-2.4433	0.0145537	0.269	NEK10
ENSG00000125534.10	672.484	1.03557	0.423993	2.44241	0.0145895	0.269402	PPDPF
ENSG00000068724.17	508.725	-0.989539	0.405263	-2.44172	0.0146174	0.269659	TTC7A
ENSG00000229109.2	35.5243	-2.01765	0.826895	-2.44003	0.0146862	0.270153	AL137847.1
ENSG00000103342.13	1321.49	0.960267	0.393539	2.44008	0.0146839	0.270153	GSPT1
ENSG00000238103.4	60.4122	1.66353	0.681629	2.44052	0.0146662	0.270153	RPL9P7
ENSG00000276980.1	24.2038	-1.95669	0.802283	-2.43891	0.0147317	0.2707	AC008760.2
ENSG00000106588.11	283.845	1.10793	0.454331	2.43861	0.014744	0.2707	PSMA2
ENSG00000286318.1	27.8938	-2.10518	0.86508	-2.4335	0.0149535	0.272062	AC096576.6
ENSG00000261200.1	25.3761	-2.87522	1.18082	-2.43493	0.0148948	0.272062	AC136944.2
ENSG00000162390.17	501.819	-1.63336	0.67142	-2.4327	0.0149867	0.272062	ACOT11
ENSG00000204347.4	64.8199	1.62872	0.669476	2.43282	0.0149816	0.272062	BTBD17
ENSG00000162063.13	158.712	1.64402	0.675099	2.43523	0.0148822	0.272062	CCNF
ENSG00000142621.19	52.4705	-1.56677	0.643665	-2.43413	0.0149275	0.272062	FHAD1
ENSG00000150667.8	34.1048	-2.07997	0.853695	-2.43644	0.0148327	0.272062	FSIP1
ENSG00000183454.17	295.608	-2.28978	0.94124	-2.43272	0.0149858	0.272062	GRIN2A
ENSG00000188580.15	35.5617	-2.78609	1.14518	-2.43288	0.0149794	0.272062	NKAIN2
ENSG00000183036.11	18.0033	-2.75826	1.13319	-2.43406	0.0149306	0.272062	PCP4
ENSG00000109819.9	346.562	-2.00778	0.825335	-2.43268	0.0149875	0.272062	PPARGC1A
ENSG00000204323.5	100.903	-2.25428	0.925803	-2.43494	0.0148941	0.272062	SMIM5
ENSG00000077420.16	314.634	-2.00866	0.826521	-2.43027	0.0150878	0.273624	APBB1IP
ENSG00000249669.10	149.591	-1.58108	0.6508	-2.42944	0.015122	0.273987	CARMN
ENSG00000144331.20	14.9363	-2.78782	1.14787	-2.42868	0.0151538	0.274306	ZNF385B
ENSG00000156535.15	274.197	-1.60685	0.662064	-2.42702	0.0152233	0.275304	CD109
ENSG00000257060.7	73.613	-1.61735	0.667086	-2.4245	0.0153293	0.276523	AC091078.1
ENSG00000168539.4	69.7158	-1.95941	0.808316	-2.42406	0.0153481	0.276523	CHRM1
ENSG00000163563.8	64.085	-1.97742	0.815694	-2.42422	0.0153415	0.276523	MNDA
ENSG00000092068.20	288.956	-1.52545	0.629132	-2.42468	0.0153218	0.276523	SLC7A8
ENSG00000196664.5	165.701	-2.31479	0.955246	-2.42324	0.0153826	0.276888	TLR7
ENSG00000170734.11	236.063	1.06104	0.438245	2.42112	0.0154729	0.278252	POLH
ENSG00000224186.8	18.9859	-2.09483	0.865773	-2.4196	0.0155375	0.279153	C5orf66
ENSG00000136122.17	44.6852	1.63509	0.675949	2.41895	0.0155653	0.279394	BORA
ENSG00000186897.5	42.2499	3.07819	1.27272	2.41859	0.0155808	0.27941	C1QL4
ENSG00000162591.16	106.915	-1.93984	0.802197	-2.41816	0.0155992	0.27948	MEGF6
ENSG00000163046.15	12.822	-2.87797	1.19182	-2.41477	0.0157451	0.281833	ANKRD30BL
ENSG00000086159.13	39.7274	-1.51405	0.627318	-2.41353	0.0157988	0.282531	AQP6
ENSG00000274997.1	115.15	2.17366	0.900999	2.4125	0.0158434	0.282851	HIST1H2AH
ENSG00000197168.13	38.9368	-2.60441	1.07957	-2.41244	0.015846	0.282851	NEK5
ENSG00000150054.18	13.9884	-3.02795	1.2556	-2.41155	0.0158849	0.283282	MPP7
ENSG00000135472.9	1921.3	-1.19604	0.496085	-2.41096	0.0159105	0.283477	FAIM2
ENSG00000100336.17	151.113	-2.52246	1.04673	-2.40985	0.015959	0.283656	APOL4
ENSG00000237928.6	120.117	-1.60491	0.666016	-2.40972	0.0159647	0.283656	NFIA-AS2
ENSG00000151650.8	32.1036	-2.20311	0.914204	-2.40986	0.0159585	0.283656	VENTX
ENSG00000214018.3	11.1612	-3.18468	1.3218	-2.40935	0.0159811	0.283686	RRM2P3
ENSG00000105879.12	335.338	0.984056	0.408732	2.40758	0.0160585	0.28434	CBLL1
ENSG00000066735.14	150.16	2.28647	0.949465	2.40817	0.0160329	0.28434	KIF26A
ENSG00000250312.8	183.86	1.03959	0.431813	2.4075	0.0160621	0.28434	ZNF718
ENSG00000268758.7	29.8943	-2.09307	0.869659	-2.40677	0.0160945	0.284389	ADGRE4P
ENSG00000167130.18	184.811	1.30973	0.544118	2.40706	0.0160813	0.284389	DOLPP1
ENSG00000172409.6	65.167	1.28521	0.534099	2.40631	0.0161146	0.284484	CLP1
ENSG00000264456.1	47.9096	-1.6059	0.667582	-2.40555	0.016148	0.284813	AC138207.4
ENSG00000260850.2	39.9535	-2.11887	0.881599	-2.40344	0.0162416	0.285941	AC007344.1
ENSG00000183876.9	116.437	2.46384	1.02508	2.40356	0.0162362	0.285941	ARSI
ENSG00000117598.13	108.994	1.37258	0.57122	2.4029	0.0162657	0.286104	PLPPR5
ENSG00000117399.14	101.879	1.79112	0.746237	2.4002	0.0163862	0.286991	CDC20
ENSG00000128683.14	657.172	1.89495	0.789104	2.40139	0.016333	0.286991	GAD1
ENSG00000101003.10	108.144	1.26269	0.526082	2.40018	0.0163868	0.286991	GINS1
ENSG00000106483.12	158.047	-1.60095	0.667036	-2.4001	0.0163906	0.286991	SFRP4
ENSG00000157150.5	420.236	-1.78632	0.743992	-2.401	0.0163504	0.286991	TIMP4
ENSG00000184845.4	15.8118	-2.49744	1.04111	-2.39883	0.0164476	0.287487	DRD1
ENSG00000275379.1	245.937	1.91725	0.799336	2.39855	0.01646	0.287487	HIST1H3I
ENSG00000169507.9	52.7472	-1.79836	0.749795	-2.39847	0.0164636	0.287487	SLC38A11
ENSG00000196421.8	91.3026	2.10874	0.879395	2.39794	0.0164874	0.287642	C20orf204
ENSG00000198554.12	85.7852	1.25832	0.524954	2.39701	0.0165294	0.288114	WDHD1
ENSG00000075702.18	95.93	1.45826	0.608605	2.39607	0.016572	0.288595	WDR62
ENSG00000188064.10	69.1242	1.7884	0.747225	2.39339	0.0166935	0.290448	WNT7B
ENSG00000137460.8	122.362	1.6426	0.686972	2.39108	0.0167991	0.29176	FHDC1
ENSG00000102290.22	53.4468	-2.50302	1.04668	-2.39139	0.0167847	0.29176	PCDH11X
ENSG00000240758.2	21.1185	2.31519	0.968894	2.38952	0.0168703	0.292093	AC010655.2
ENSG00000198885.9	97.4387	1.2799	0.535475	2.39021	0.0168388	0.292093	ITPRIPL1
ENSG00000141524.15	334.861	-1.28338	0.53713	-2.38934	0.0168789	0.292093	TMC6
ENSG00000104689.10	19.5394	-2.26282	0.947022	-2.38941	0.0168755	0.292093	TNFRSF10A
ENSG00000250863.2	41.0051	-1.75276	0.733699	-2.38893	0.0168974	0.292152	AC114757.1
ENSG00000126733.21	17.44	-2.49951	1.04671	-2.38798	0.0169413	0.292234	DACH2
ENSG00000261824.7	669.043	1.18898	0.497917	2.3879	0.0169448	0.292234	LINC00662
ENSG00000204634.12	181.873	-1.12203	0.469894	-2.38784	0.0169477	0.292234	TBC1D8
ENSG00000136250.12	140.438	-2.10939	0.884352	-2.38524	0.017068	0.293896	AOAH
ENSG00000176928.6	31.9847	-2.24603	0.941692	-2.3851	0.0170746	0.293896	GCNT4
ENSG00000119917.14	359.78	-1.83497	0.769685	-2.38405	0.0171231	0.294206	IFIT3
ENSG00000232044.7	836.831	1.68321	0.705993	2.38418	0.0171173	0.294206	SILC1
ENSG00000243620.2	72.1211	-3.04299	1.2769	-2.38312	0.0171667	0.294277	AC092957.1
ENSG00000163734.4	37.0733	2.28695	0.959665	2.38307	0.0171688	0.294277	CXCL3
ENSG00000079462.7	205.537	1.23363	0.517685	2.38298	0.017173	0.294277	PAFAH1B3
ENSG00000188488.14	45.6741	-2.18365	0.91678	-2.38187	0.0172252	0.294909	SERPINA5
ENSG00000181656.7	19.3786	-2.28746	0.960985	-2.38033	0.0172973	0.295619	GPR88
ENSG00000253877.6	17.8722	-3.18311	1.33725	-2.38035	0.0172964	0.295619	LINC01608
ENSG00000146540.15	718.766	1.14601	0.481696	2.37913	0.0173538	0.296321	C7orf50
ENSG00000204161.14	33.4245	-1.82347	0.76667	-2.37843	0.0173866	0.296618	TMEM273
ENSG00000227157.2	31.4704	2.7523	1.15882	2.3751	0.0175442	0.296682	AC068535.1
ENSG00000042493.16	472.708	-1.43559	0.60384	-2.37743	0.0174336	0.296682	CAPG
ENSG00000278463.1	93.8372	2.13064	0.896831	2.37575	0.0175135	0.296682	HIST1H2AB
ENSG00000196787.3	340.874	2.16147	0.909939	2.37539	0.0175302	0.296682	HIST1H2AG
ENSG00000274618.1	55.138	1.97203	0.829483	2.37742	0.0174343	0.296682	HIST1H4F
ENSG00000108924.14	233.914	-1.86811	0.7861	-2.37643	0.0174812	0.296682	HLF
ENSG00000072571.20	27.3887	2.02213	0.851353	2.37519	0.0175397	0.296682	HMMR
ENSG00000203499.11	10.0208	-2.68984	1.13208	-2.37602	0.0175007	0.296682	IQANK1
ENSG00000198300.14	1243.25	-2.02164	0.850553	-2.37685	0.0174611	0.296682	PEG3
ENSG00000188171.16	285.439	0.997106	0.419751	2.37547	0.0175265	0.296682	ZNF626
ENSG00000162711.17	132.657	-1.61669	0.680795	-2.37471	0.0175627	0.296735	NLRP3
ENSG00000104897.10	581.619	1.10968	0.467401	2.37414	0.0175898	0.296932	SF3A2
ENSG00000061656.10	36.0067	1.50489	0.634299	2.37253	0.0176669	0.297729	SPAG4
ENSG00000204396.11	32.2967	-1.56653	0.660283	-2.37251	0.0176679	0.297729	VWA7
ENSG00000142959.5	35.9452	-2.37264	1.00049	-2.37147	0.0177175	0.298303	BEST4
ENSG00000100285.10	39.8034	-1.89723	0.800197	-2.37095	0.0177425	0.298464	NEFH
ENSG00000115252.18	42.8577	-2.12868	0.898697	-2.36863	0.0178542	0.299819	PDE1A
ENSG00000229117.9	1042.89	1.16944	0.493717	2.36864	0.0178535	0.299819	RPL41
ENSG00000106245.11	215.886	1.16454	0.491891	2.36748	0.0179099	0.300267	BUD31
ENSG00000146918.20	275.374	1.33591	0.564312	2.36733	0.0179171	0.300267	NCAPG2
ENSG00000091664.9	78.992	2.3672	1.00004	2.36711	0.0179275	0.300267	SLC17A6
ENSG00000189367.15	302.322	1.31529	0.555754	2.36668	0.0179483	0.300354	KIAA0408
ENSG00000271614.1	44.7332	-1.56325	0.660852	-2.3655	0.0180058	0.300399	ATP2B1-AS1
ENSG00000019991.18	68.0966	-1.83829	0.777167	-2.36537	0.018012	0.300399	HGF
ENSG00000079277.21	380.774	-1.15337	0.487677	-2.36502	0.0180289	0.300399	MKNK1
ENSG00000100100.13	364.31	-1.42433	0.601926	-2.36628	0.0179678	0.300399	PIK3IP1
ENSG00000064419.13	829.704	0.945338	0.39969	2.36518	0.0180215	0.300399	TNPO3
ENSG00000186193.9	303.083	1.73455	0.733689	2.36415	0.0180717	0.300726	SAPCD2
ENSG00000110876.9	299.618	-1.91065	0.808236	-2.36398	0.0180798	0.300726	SELPLG
ENSG00000187017.17	18.3609	2.17636	0.921641	2.3614	0.0182063	0.302309	ESPN
ENSG00000161405.17	28.6609	-2.33584	0.989116	-2.36154	0.0181991	0.302309	IKZF3
ENSG00000104974.12	45.5155	-2.43003	1.02961	-2.36015	0.0182677	0.302548	LILRA1
ENSG00000140563.15	64.4793	-2.95023	1.24989	-2.36039	0.0182559	0.302548	MCTP2
ENSG00000212864.3	124.547	1.31562	0.557422	2.36019	0.0182653	0.302548	RNF208
ENSG00000091732.16	180.909	1.28882	0.546191	2.35965	0.0182923	0.302694	ZC3HC1
ENSG00000163346.17	2318.16	-1.70266	0.721831	-2.3588	0.018334	0.303124	PBXIP1
ENSG00000269053.1	53.9614	6.15972	2.61187	2.35836	0.0183559	0.303227	AC010319.3
ENSG00000249362.2	16.5093	3.09589	1.31315	2.35761	0.0183928	0.303576	LINC02488
ENSG00000175130.7	2986.25	1.53925	0.653216	2.35643	0.0184517	0.304288	MARCKSL1
ENSG00000124549.14	66.9474	-1.32824	0.563796	-2.35588	0.0184789	0.304476	BTN2A3P
ENSG00000119138.4	999.095	-1.49987	0.636825	-2.35522	0.0185115	0.304752	KLF9
ENSG00000144061.12	160.997	-1.16415	0.494602	-2.35371	0.0185872	0.305738	NPHP1
ENSG00000135476.11	110.389	1.68108	0.714434	2.35302	0.0186216	0.306042	ESPL1
ENSG00000110324.10	454.893	-1.8359	0.780635	-2.35181	0.0186825	0.306781	IL10RA
ENSG00000224950.2	13.8658	-2.11793	0.900758	-2.35128	0.0187092	0.306958	AL390066.1
ENSG00000151466.12	156.11	-1.23492	0.525349	-2.35066	0.01874	0.307202	SCLT1
ENSG00000141519.15	247.951	-1.86698	0.794844	-2.34887	0.0188306	0.308425	CCDC40
ENSG00000148700.15	1179.25	-1.50496	0.641182	-2.34716	0.0189172	0.308534	ADD3
ENSG00000204338.8	16.4687	-2.22326	0.947184	-2.34724	0.0189132	0.308534	CYP21A1P
ENSG00000187164.20	454.899	-1.46292	0.623255	-2.34723	0.0189134	0.308534	SHTN1
ENSG00000110660.15	153.189	1.42251	0.605899	2.34776	0.0188867	0.308534	SLC35F2
ENSG00000138741.11	15.4509	-2.24997	0.958177	-2.34818	0.0188653	0.308534	TRPC3
ENSG00000259275.4	19.7357	-1.96807	0.83919	-2.3452	0.0190168	0.309746	AC087477.2
ENSG00000005844.18	142.707	-1.92063	0.81901	-2.34507	0.0190237	0.309746	ITGAL
ENSG00000258811.1	16.1165	2.59296	1.10652	2.34335	0.0191114	0.310648	AL583810.2
ENSG00000109917.11	545.144	1.24885	0.532862	2.34366	0.0190955	0.310648	ZPR1
ENSG00000169083.17	452.998	-1.72459	0.736072	-2.34297	0.0191311	0.310708	AR
ENSG00000231533.2	31.5413	-1.61218	0.688728	-2.3408	0.0192424	0.312037	AL391840.1
ENSG00000185614.6	32.1175	-1.82621	0.780255	-2.34053	0.0192562	0.312037	INKA1
ENSG00000160999.10	122.52	1.40473	0.600204	2.34043	0.0192616	0.312037	SH2B2
ENSG00000173727.12	39.7558	1.77414	0.758185	2.33998	0.0192849	0.312154	AP000769.1
ENSG00000085872.15	782.519	0.892809	0.381716	2.33893	0.0193389	0.312765	CHERP
ENSG00000139173.10	57.6481	-1.22111	0.52222	-2.3383	0.0193717	0.313033	TMEM117
ENSG00000155660.11	1450.19	1.27541	0.545567	2.33777	0.0193993	0.313215	PDIA4
ENSG00000139211.6	75.8824	-1.68857	0.722672	-2.33656	0.0194618	0.313963	AMIGO2
ENSG00000173114.13	457.248	1.45628	0.623394	2.33605	0.0194887	0.314134	LRRN3
ENSG00000163032.12	185.427	-2.23836	0.958403	-2.33551	0.0195167	0.314322	VSNL1
ENSG00000213073.4	42.7565	-1.30677	0.559673	-2.33487	0.01955	0.314345	AL353625.1
ENSG00000182255.7	22.8434	-2.1746	0.931364	-2.33486	0.0195507	0.314345	KCNA4
ENSG00000022355.18	88.2133	-1.91214	0.819263	-2.33398	0.0195969	0.314607	GABRA1
ENSG00000215845.11	81.5555	1.45823	0.624799	2.33392	0.0195997	0.314607	TSTD1
ENSG00000178342.4	29.0224	-2.67463	1.14615	-2.33358	0.019618	0.314638	KCNG2
ENSG00000171885.16	10800.1	-1.52898	0.655548	-2.33236	0.0196817	0.314875	AQP4
ENSG00000102302.8	303.276	1.26704	0.543241	2.33238	0.0196809	0.314875	FGD1
ENSG00000145632.15	201.474	-1.43307	0.614386	-2.33252	0.0196733	0.314875	PLK2
ENSG00000105810.9	2829.58	1.8243	0.782568	2.33117	0.0197441	0.315612	CDK6
ENSG00000155307.18	120.859	-1.81299	0.777944	-2.33049	0.0197801	0.315924	SAMSN1
ENSG00000183684.8	203.76	1.11654	0.479314	2.32946	0.0198347	0.315967	ALYREF
ENSG00000123500.10	14.9158	-3.60068	1.54574	-2.32942	0.019837	0.315967	COL10A1
ENSG00000168676.11	13.7852	2.52932	1.08608	2.32886	0.0198663	0.315967	KCTD19
ENSG00000163808.17	79.238	1.61074	0.691817	2.32828	0.0198975	0.315967	KIF15
ENSG00000146006.8	438.729	1.453	0.623701	2.32964	0.0198252	0.315967	LRRTM2
ENSG00000129195.16	85.1609	2.02675	0.870353	2.32865	0.0198775	0.315967	PIMREG
ENSG00000141497.14	51.4306	-1.66175	0.713725	-2.32828	0.0198973	0.315967	ZMYND15
ENSG00000115085.13	20.0732	-1.97317	0.848131	-2.32649	0.0199924	0.31717	ZAP70
ENSG00000196081.9	57.5181	1.47227	0.632901	2.32623	0.0200061	0.31717	ZNF724
ENSG00000264853.1	63.1708	-1.25415	0.539394	-2.3251	0.0200664	0.317603	AC011933.2
ENSG00000181215.15	103.15	-2.02889	0.872531	-2.32529	0.0200565	0.317603	C4orf50
ENSG00000275713.2	123.994	1.95012	0.838952	2.32447	0.0201004	0.31788	HIST1H2BH
ENSG00000145526.12	43.0358	-2.65924	1.14441	-2.32367	0.0201431	0.318262	CDH18
ENSG00000174136.13	916.583	1.25344	0.539486	2.3234	0.0201576	0.318262	RGMB
ENSG00000274536.7	72.7591	-1.79942	0.775362	-2.32075	0.0203004	0.319992	AL034397.3
ENSG00000102172.16	393.558	1.08369	0.466949	2.32079	0.0202981	0.319992	SMS
ENSG00000224959.1	40.888	-1.95041	0.841555	-2.31762	0.0204698	0.320527	AC017002.1
ENSG00000188070.9	512.676	1.19642	0.516707	2.31547	0.020587	0.320527	C11orf95
ENSG00000253549.6	23.2425	-1.7553	0.757546	-2.31709	0.020499	0.320527	CA3-AS1
ENSG00000198286.9	70.2084	-1.75347	0.756248	-2.31864	0.0204146	0.320527	CARD11
ENSG00000183230.17	134.506	-2.01869	0.87187	-2.31535	0.0205935	0.320527	CTNNA3
ENSG00000196730.13	592.672	-1.24958	0.539535	-2.31603	0.0205564	0.320527	DAPK1
ENSG00000078401.7	88.7753	-1.34996	0.582379	-2.31801	0.0204489	0.320527	EDN1
ENSG00000178965.14	169.114	-1.98552	0.857238	-2.31618	0.0205484	0.320527	ERICH3
ENSG00000099260.11	126.716	-1.65317	0.714041	-2.31523	0.0206003	0.320527	PALMD
ENSG00000021300.14	2109.59	-1.11359	0.480609	-2.31703	0.0205021	0.320527	PLEKHB1
ENSG00000106246.17	191.04	1.04321	0.450079	2.31785	0.0204577	0.320527	PTCD1
ENSG00000144285.21	866.708	-1.73046	0.746293	-2.31874	0.0204089	0.320527	SCN1A
ENSG00000170379.20	211.161	1.34167	0.57867	2.31854	0.0204199	0.320527	TCAF2
ENSG00000102265.12	2945.66	2.46914	1.06444	2.31967	0.0203586	0.320527	TIMP1
ENSG00000128815.19	417.666	-1.91539	0.826431	-2.31766	0.0204677	0.320527	WDFY4
ENSG00000169884.14	15.7427	-2.23641	0.965678	-2.3159	0.0205638	0.320527	WNT10B
ENSG00000125931.11	74.1545	1.98798	0.858794	2.31485	0.0206213	0.320594	CITED1
ENSG00000066279.18	278.596	1.44352	0.623833	2.31395	0.0206704	0.32092	ASPM
ENSG00000183010.17	222.439	1.3509	0.583831	2.31386	0.0206755	0.32092	PYCR1
ENSG00000139910.20	2189.01	1.12052	0.484535	2.31256	0.0207466	0.321765	NOVA1
ENSG00000112715.22	11846.8	1.90005	0.821774	2.31214	0.0207701	0.32187	VEGFA
ENSG00000179603.17	35.3757	-1.80453	0.78069	-2.31146	0.0208075	0.321932	GRM8
ENSG00000205084.11	538.996	-1.39162	0.602046	-2.31149	0.020806	0.321932	TMEM231
ENSG00000116396.14	307.329	-1.42633	0.617569	-2.3096	0.0209106	0.323267	KCNC4
ENSG00000091651.9	55.1731	1.72736	0.748279	2.30844	0.0209748	0.32382	ORC6
ENSG00000197106.7	308.143	-1.65478	0.716869	-2.30835	0.0209799	0.32382	SLC6A17
ENSG00000106554.13	344.326	0.9098	0.394215	2.30787	0.0210061	0.323964	CHCHD3
ENSG00000069431.11	162.056	-1.61702	0.701488	-2.30513	0.0211591	0.32404	ABCC9
ENSG00000255491.3	16.1171	-2.32027	1.00668	-2.30487	0.0211738	0.32404	AC100858.3
ENSG00000223804.5	28.6016	-1.73942	0.754362	-2.30581	0.0211212	0.32404	AC244669.1
ENSG00000159708.18	12.5544	-2.00966	0.871717	-2.3054	0.0211442	0.32404	LRRC36
ENSG00000122585.8	35.44	-2.53798	1.10009	-2.30706	0.0210515	0.32404	NPY
ENSG00000182752.10	87.1862	-1.99856	0.866505	-2.30645	0.0210852	0.32404	PAPPA
ENSG00000273344.1	124.849	1.41943	0.615435	2.30638	0.0210896	0.32404	PAXIP1-AS1
ENSG00000185187.13	32.1403	-1.49918	0.650436	-2.30489	0.0211729	0.32404	SIGIRR
ENSG00000106290.15	538.405	1.03708	0.449969	2.30478	0.0211791	0.32404	TAF6
ENSG00000215218.4	104.032	-1.62464	0.704553	-2.30592	0.0211151	0.32404	UBE2QL1
ENSG00000104341.17	793.694	1.3338	0.578901	2.30402	0.0212213	0.324429	LAPTM4B
ENSG00000164588.7	62.5379	-2.48439	1.07885	-2.30282	0.021289	0.325206	HCN1
ENSG00000261270.1	17.8356	-2.07997	0.903672	-2.30169	0.0213529	0.325923	AC012181.2
ENSG00000081181.8	56.8199	1.39392	0.605756	2.30112	0.0213846	0.326149	ARG2
ENSG00000152213.4	31.0253	-1.89213	0.8226	-2.30018	0.0214382	0.326242	ARL11
ENSG00000196169.15	51.1663	-2.01758	0.87709	-2.30031	0.0214304	0.326242	KIF19
ENSG00000125637.16	258.906	-1.83266	0.796765	-2.30012	0.0214415	0.326242	PSD4
ENSG00000075618.18	2715.31	1.08796	0.473314	2.29861	0.0215273	0.326293	FSCN1
ENSG00000131149.19	1446.94	1.38035	0.60025	2.29962	0.0214696	0.326293	GSE1
ENSG00000107833.10	45.3258	1.33675	0.581558	2.29857	0.0215294	0.326293	NPM3
ENSG00000122733.12	228.429	-1.34868	0.586736	-2.29861	0.021527	0.326293	PHF24
ENSG00000157502.13	13.6766	-2.51957	1.09573	-2.29944	0.02148	0.326293	PWWP3B
ENSG00000175414.7	1003.68	1.20944	0.526346	2.2978	0.0215729	0.326695	ARL10
ENSG00000163888.4	112.331	1.52389	0.663324	2.29735	0.0215986	0.326827	CAMK2N2
ENSG00000139675.12	107.732	1.12455	0.489564	2.29704	0.0216165	0.326841	HNRNPA1L2
ENSG00000145708.11	16.8948	-3.11658	1.35753	-2.29577	0.0216891	0.327682	CRHBP
ENSG00000133835.16	593.202	-0.956025	0.416605	-2.2948	0.0217445	0.328261	HSD17B4
ENSG00000108846.16	1731.65	-1.78416	0.778042	-2.29313	0.0218403	0.32945	ABCC3
ENSG00000103241.7	40.6147	-1.60904	0.701865	-2.29252	0.0218756	0.329525	FOXF1
ENSG00000052126.14	354.877	-1.11196	0.485054	-2.29245	0.0218795	0.329525	PLEKHA5
ENSG00000258743.6	15.068	3.61967	1.5794	2.2918	0.021917	0.329832	LINC02301
ENSG00000141485.16	10.7338	-2.13946	0.934038	-2.29055	0.0219892	0.330661	SLC13A5
ENSG00000187091.13	486.916	-1.11719	0.487818	-2.29018	0.0220111	0.330732	PLCD1
ENSG00000182010.11	55.7514	1.51328	0.660949	2.28956	0.0220467	0.33101	RTKN2
ENSG00000232533.1	47.4764	1.27379	0.556516	2.28887	0.022087	0.331356	AC093673.1
ENSG00000089820.15	418.221	-1.34278	0.586752	-2.28849	0.0221091	0.331406	ARHGAP4
ENSG00000198075.10	199.59	-1.58603	0.693129	-2.28822	0.0221247	0.331406	SULT1C4
ENSG00000130766.5	344.943	1.13987	0.498306	2.28749	0.0221672	0.331786	SESN2
ENSG00000274265.5	422.855	-1.29645	0.56696	-2.28667	0.0222154	0.332248	AC245297.3
ENSG00000140749.9	104.966	-2.03012	0.888186	-2.28569	0.0222723	0.332326	IGSF6
ENSG00000123119.12	168.382	-1.96113	0.857985	-2.28574	0.0222697	0.332326	NECAB1
ENSG00000281103.2	10.8238	-2.81203	1.23022	-2.2858	0.022266	0.332326	TRG-AS1
ENSG00000187416.12	602.113	1.52714	0.668436	2.28465	0.0223334	0.33298	LHFPL3
ENSG00000183196.10	903.523	-1.1068	0.485017	-2.28198	0.0224908	0.332985	CHST6
ENSG00000184481.17	228.632	-1.47047	0.644594	-2.28123	0.022535	0.332985	FOXO4
ENSG00000115594.12	200.551	-1.9874	0.871071	-2.28156	0.0225156	0.332985	IL1R1
ENSG00000281852.1	10.4365	-2.56006	1.12228	-2.28113	0.022541	0.332985	LINC00891
ENSG00000165028.12	43.4711	-1.736	0.759995	-2.28422	0.0223587	0.332985	NIPSNAP3B
ENSG00000116273.6	285.641	1.11621	0.489319	2.28116	0.0225392	0.332985	PHF13
ENSG00000184347.14	77.4124	-1.3431	0.588432	-2.2825	0.0224596	0.332985	SLIT3
ENSG00000005513.10	1618.89	1.7206	0.75332	2.28402	0.0223705	0.332985	SOX8
ENSG00000152253.9	35.9707	1.84243	0.807579	2.28143	0.0225231	0.332985	SPC25
ENSG00000137699.17	19.5061	-2.86255	1.25375	-2.2832	0.0224189	0.332985	TRIM29
ENSG00000186806.5	50.7803	2.21234	0.969805	2.28123	0.022535	0.332985	VSIG10L
ENSG00000248208.1	16.9232	-1.86637	0.817738	-2.28236	0.0224683	0.332985	WDR45P1
ENSG00000255874.2	62.4214	-1.98767	0.871801	-2.27996	0.0226099	0.33304	LINC00346
ENSG00000139496.16	687.059	1.00567	0.441105	2.2799	0.0226139	0.33304	NUP58
ENSG00000149292.16	98.8919	-1.75302	0.768735	-2.28039	0.0225845	0.33304	TTC12
ENSG00000004838.14	38.8238	-1.44802	0.63505	-2.28017	0.0225979	0.33304	ZMYND10
ENSG00000164649.20	254.496	1.29411	0.567804	2.27915	0.0226583	0.333261	CDCA7L
ENSG00000109674.4	22.9924	2.17773	0.955539	2.27906	0.0226634	0.333261	NEIL3
ENSG00000036672.16	376.867	-1.19558	0.524666	-2.27873	0.0226829	0.333293	USP2
ENSG00000261654.1	33.5177	1.57165	0.690186	2.27714	0.0227779	0.333672	AL360270.2
ENSG00000265531.3	65.4786	-1.81179	0.795458	-2.27766	0.0227466	0.333672	FCGR1CP
ENSG00000265158.1	11.9108	-2.68029	1.1769	-2.27742	0.0227612	0.333672	LRRC37A7P
ENSG00000006747.15	511.019	-2.03662	0.89408	-2.27789	0.0227331	0.333672	SCIN
ENSG00000118690.13	113.04	-1.41463	0.621651	-2.2756	0.02287	0.334515	ARMC2
ENSG00000173068.18	136.677	-1.64875	0.724536	-2.2756	0.0228702	0.334515	BNC2
ENSG00000106144.20	615.818	1.18094	0.519106	2.27496	0.0229086	0.33457	CASP2
ENSG00000164638.10	670.991	1.58268	0.695635	2.27515	0.0228967	0.33457	SLC29A4
ENSG00000152256.13	491.208	1.20109	0.528275	2.27362	0.022989	0.33549	PDK1
ENSG00000230490.3	21.0866	-1.93529	0.8519	-2.27174	0.0231024	0.335621	AL139383.1
ENSG00000131480.9	39.0092	1.67743	0.738216	2.27227	0.0230701	0.335621	AOC2
ENSG00000203709.12	983.028	-1.41189	0.621227	-2.27274	0.0230418	0.335621	MIR29B2CHG
ENSG00000078114.18	1089.42	-1.5764	0.693878	-2.27187	0.0230944	0.335621	NEBL
ENSG00000166428.13	297.966	-2.52711	1.11216	-2.27224	0.0230719	0.335621	PLD4
ENSG00000261678.3	255.927	2.23294	0.982735	2.27217	0.0230762	0.335621	SCRT1
ENSG00000231881.2	42.7949	2.70742	1.19313	2.26917	0.0232581	0.33712	AL109615.2
ENSG00000239998.6	65.5455	-2.08435	0.918524	-2.26923	0.0232541	0.33712	LILRA2
ENSG00000101307.15	56.247	-1.52781	0.673206	-2.26946	0.0232404	0.33712	SIRPB1
ENSG00000151948.12	26.0678	-2.11972	0.934714	-2.26777	0.0233431	0.3374	GLT1D1
ENSG00000185164.14	1183.34	1.04098	0.459048	2.2677	0.0233474	0.3374	NOMO2
ENSG00000011638.10	65.9113	1.21951	0.537594	2.26846	0.0233014	0.3374	TMEM159
ENSG00000149050.10	46.8336	-1.26557	0.557988	-2.2681	0.0233232	0.3374	ZNF214
ENSG00000186479.5	138.037	-1.27251	0.561427	-2.26656	0.0234169	0.338151	RGS7BP
ENSG00000259426.6	29.3714	-1.9781	0.873988	-2.2633	0.0236171	0.340537	AC027237.3
ENSG00000170312.16	79.1814	1.54983	0.684768	2.2633	0.0236175	0.340537	CDK1
ENSG00000175591.11	13.3494	-2.11166	0.933424	-2.26227	0.0236806	0.340682	P2RY2
ENSG00000197943.10	191.532	-1.94242	0.858399	-2.26284	0.0236456	0.340682	PLCG2
ENSG00000173113.6	315.545	0.880892	0.389341	2.26252	0.0236651	0.340682	TRMT112
ENSG00000285492.1	26.3804	-2.83963	1.25539	-2.26194	0.023701	0.340721	AL356417.3
ENSG00000197565.15	88.9781	-2.38473	1.05497	-2.26048	0.0237916	0.341769	COL4A6
ENSG00000124224.17	102.614	-1.28415	0.568386	-2.25929	0.0238652	0.342571	PPP4R1L
ENSG00000091986.15	761.58	-1.1143	0.49335	-2.25864	0.0239055	0.34264	CCDC80
ENSG00000198019.13	115.967	-1.54571	0.684304	-2.25881	0.023895	0.34264	FCGR1B
ENSG00000248905.9	322.849	-1.68893	0.747988	-2.25796	0.0239483	0.342669	FMN1
ENSG00000125820.6	400.283	1.42548	0.631368	2.25776	0.0239609	0.342669	NKX2-2
ENSG00000122012.14	40.0978	-1.56997	0.695351	-2.25781	0.0239575	0.342669	SV2C
ENSG00000134917.10	49.7856	-1.43139	0.634107	-2.25733	0.0239872	0.342791	ADAMTS8
ENSG00000110723.12	212.272	-1.73617	0.769454	-2.25637	0.0240475	0.343399	EXPH5
ENSG00000259363.6	33.7496	-2.22666	0.988049	-2.2536	0.0242216	0.343741	AC090825.1
ENSG00000168010.11	347.32	-1.21016	0.537077	-2.25323	0.0242449	0.343741	ATG16L2
ENSG00000080224.17	31.3359	-2.52385	1.11909	-2.25528	0.024116	0.343741	EPHA6
ENSG00000251442.6	433.907	-1.40517	0.623435	-2.25392	0.0242015	0.343741	LINC01094
ENSG00000149273.15	1471.68	0.904791	0.4013	2.25465	0.0241554	0.343741	RPS3
ENSG00000104450.12	161.655	-1.54241	0.684559	-2.25315	0.0242498	0.343741	SPAG1
ENSG00000182253.15	2062.72	-1.97334	0.875775	-2.25325	0.0242431	0.343741	SYNM
ENSG00000258659.6	54.4466	-1.72709	0.766109	-2.25437	0.0241728	0.343741	TRIM34
ENSG00000142185.16	434.956	-1.85871	0.824753	-2.25366	0.0242178	0.343741	TRPM2
ENSG00000196632.10	511.334	0.975775	0.432664	2.25527	0.0241162	0.343741	WNK3
ENSG00000150637.9	81.0101	-1.40138	0.622221	-2.25223	0.0243078	0.343834	CD226
ENSG00000169291.10	35.6228	-1.51999	0.674891	-2.25221	0.0243092	0.343834	SHE
ENSG00000042088.14	198.207	1.59696	0.70907	2.2522	0.0243099	0.343834	TDP1
ENSG00000106638.17	375.552	0.878085	0.389939	2.25185	0.0243316	0.343889	TBL2
ENSG00000171488.15	233.208	-1.11195	0.493865	-2.25153	0.0243521	0.343927	LRRC8C
ENSG00000067113.17	315.408	-1.08306	0.481154	-2.25096	0.0243881	0.344166	PLPP1
ENSG00000153485.5	66.9705	1.26003	0.559839	2.2507	0.0244048	0.344166	TMEM251
ENSG00000114626.18	207.765	-1.10795	0.492575	-2.2493	0.0244935	0.344169	ABTB1
ENSG00000285772.1	10.6978	3.05719	1.35858	2.25029	0.0244307	0.344169	AC000120.2
ENSG00000165669.14	226.537	-1.06842	0.475002	-2.24929	0.0244942	0.344169	FAM204A
ENSG00000165661.16	353.639	1.0102	0.449032	2.24973	0.0244662	0.344169	QSOX2
ENSG00000154760.14	55.7196	-1.91577	0.851618	-2.24957	0.0244764	0.344169	SLFN13
ENSG00000237737.6	12.4142	-2.20902	0.982936	-2.24737	0.0246164	0.34463	DCTN1-AS1
ENSG00000162777.17	79.8488	-1.59602	0.710143	-2.24746	0.0246107	0.34463	DENND2D
ENSG00000102854.16	20.6831	-2.11913	0.942907	-2.24744	0.0246118	0.34463	MSLN
ENSG00000166473.17	84.9766	-2.11701	0.941804	-2.24782	0.0245877	0.34463	PKD1L2
ENSG00000170893.4	33.4902	2.61459	1.16311	2.24793	0.0245805	0.34463	TRH
ENSG00000072952.18	314.526	-1.10237	0.490633	-2.24682	0.0246513	0.344828	MRVI1
ENSG00000146530.14	16.11	-2.84376	1.26581	-2.24659	0.0246664	0.344828	VWDE
ENSG00000173706.14	1337.45	-0.954948	0.425138	-2.2462	0.0246909	0.344921	HEG1
ENSG00000275126.1	46.3807	2.24586	1.00015	2.24552	0.0247349	0.344994	HIST1H4L
ENSG00000155304.6	822.206	0.994517	0.443069	2.24461	0.0247932	0.344994	HSPA13
ENSG00000186818.12	339.13	-1.89892	0.845909	-2.24482	0.0247794	0.344994	LILRB4
ENSG00000177409.12	754.831	-1.45673	0.648893	-2.24494	0.024772	0.344994	SAMD9L
ENSG00000010270.13	461.467	1.03398	0.460685	2.24445	0.0248035	0.344994	STARD3NL
ENSG00000171530.14	218.082	1.0837	0.482749	2.24486	0.0247773	0.344994	TBCA
ENSG00000070808.16	1009.89	-1.66248	0.741097	-2.24327	0.0248791	0.345081	CAMK2A
ENSG00000188649.14	27.0513	-1.47577	0.657854	-2.24332	0.0248765	0.345081	CC2D2B
ENSG00000159374.17	11.352	-2.17371	0.969007	-2.24324	0.0248813	0.345081	M1AP
ENSG00000085721.12	489.088	1.08825	0.484972	2.24394	0.0248365	0.345081	RRN3
ENSG00000123901.9	18.6334	-2.02897	0.904737	-2.24261	0.0249219	0.345395	GPR83
ENSG00000106261.17	2160.15	0.950269	0.423903	2.24171	0.02498	0.345951	ZKSCAN1
ENSG00000131016.17	2986.26	1.76581	0.788592	2.2392	0.0251432	0.347062	AKAP12
ENSG00000179583.19	1573.94	-1.67798	0.749405	-2.23909	0.0251502	0.347062	CIITA
ENSG00000162894.12	12.7179	-2.0474	0.914217	-2.23952	0.0251223	0.347062	FCMR
ENSG00000115758.13	533.306	1.34521	0.600603	2.23977	0.0251056	0.347062	ODC1
ENSG00000078319.9	92.6498	1.2543	0.560015	2.23977	0.0251058	0.347062	PMS2P1
ENSG00000136541.14	311.43	-2.66234	1.18929	-2.23859	0.0251824	0.347258	ERMN
ENSG00000184730.11	64.3175	-1.46726	0.655558	-2.23819	0.0252089	0.347375	APOBR
ENSG00000138769.11	55.2655	-1.87523	0.837952	-2.23788	0.0252291	0.347405	CDKL2
ENSG00000234358.1	35.9459	-1.5813	0.707058	-2.23645	0.0253226	0.347699	AC003080.1
ENSG00000250138.4	119.263	-1.71637	0.767442	-2.23648	0.0253203	0.347699	AC139495.3
ENSG00000124635.8	92.6116	2.05215	0.917275	2.23723	0.0252715	0.347699	HIST1H2BJ
ENSG00000188039.14	430.137	-1.96332	0.877694	-2.23691	0.0252922	0.347699	NWD1
ENSG00000023171.18	822.881	-1.06447	0.47605	-2.23604	0.0253494	0.347818	GRAMD1B
ENSG00000270574.1	37.1651	1.95085	0.873368	2.23371	0.0255019	0.347824	AC010680.2
ENSG00000128284.19	79.6014	-1.43111	0.640616	-2.23396	0.0254856	0.347824	APOL3
ENSG00000106069.22	147.746	-1.71001	0.765381	-2.2342	0.0254701	0.347824	CHN2
ENSG00000168243.11	331.502	1.3782	0.616823	2.23434	0.0254604	0.347824	GNG4
ENSG00000280650.1	190.096	-1.95345	0.873934	-2.23524	0.0254018	0.347824	KCNIP4-IT1
ENSG00000185432.12	2070.52	-1.21258	0.542805	-2.23391	0.0254888	0.347824	METTL7A
ENSG00000136297.14	120.727	1.46438	0.655625	2.23356	0.0255122	0.347824	MMD2
ENSG00000140398.14	241.258	-1.25858	0.563173	-2.23479	0.0254309	0.347824	NEIL1
ENSG00000249242.8	152.613	-1.11041	0.49708	-2.23387	0.0254919	0.347824	TMEM150C
ENSG00000083635.8	97.859	1.22193	0.547295	2.23266	0.0255711	0.348381	NUFIP1
ENSG00000130038.10	62.2939	-1.66044	0.744073	-2.23156	0.0256443	0.349133	CRACR2A
ENSG00000167900.12	48.617	1.83615	0.823582	2.22946	0.0257831	0.350774	TK1
ENSG00000138944.8	138.22	-1.5885	0.712654	-2.229	0.0258142	0.350949	SHISAL1
ENSG00000077080.10	149.064	2.50242	1.12283	2.22868	0.0258351	0.350986	ACTL6B
ENSG00000187134.14	17.949	-2.63154	1.18107	-2.22809	0.0258744	0.351016	AKR1C1
ENSG00000275714.1	86.7066	2.02822	0.910402	2.22783	0.0258919	0.351016	HIST1H3A
ENSG00000163026.12	155.43	1.11666	0.501213	2.22792	0.0258857	0.351016	WDCP
ENSG00000273374.1	13.795	3.14365	1.4117	2.22686	0.0259564	0.351643	AC069222.1
ENSG00000262119.1	219.079	1.14224	0.513024	2.22648	0.0259823	0.351747	AL079343.1
ENSG00000070190.13	20.6288	-2.01749	0.906525	-2.22553	0.026046	0.351992	DAPP1
ENSG00000136689.18	35.8031	-1.83537	0.824782	-2.22528	0.0260626	0.351992	IL1RN
ENSG00000164087.8	52.3016	1.42847	0.641898	2.22539	0.0260549	0.351992	POC1A
ENSG00000051341.14	73.9135	1.61928	0.727726	2.22512	0.0260735	0.351992	POLQ
ENSG00000181790.11	1165.3	1.76106	0.791752	2.22426	0.0261309	0.352273	ADGRB1
ENSG00000273802.2	205.917	1.6372	0.735996	2.22447	0.0261166	0.352273	HIST1H2BG
ENSG00000138756.17	1155.12	-1.19223	0.536286	-2.22313	0.0262068	0.352961	BMP2K
ENSG00000179846.9	16.1282	1.90498	0.856957	2.22296	0.0262185	0.352961	NKPD1
ENSG00000196990.8	77.9064	-1.6872	0.759105	-2.22261	0.0262419	0.353029	FAM163B
ENSG00000277775.1	228.124	1.918	0.863186	2.222	0.0262835	0.353197	HIST1H3F
ENSG00000173535.14	18.7388	-1.68876	0.760059	-2.22189	0.026291	0.353197	TNFRSF10C
ENSG00000140463.14	195.575	-0.944194	0.425111	-2.22105	0.0263474	0.353709	BBS4
ENSG00000164089.9	70.4585	-2.08382	0.938333	-2.22077	0.0263666	0.35372	ETNPPL
ENSG00000164039.15	279.696	-1.23231	0.555181	-2.21966	0.0264419	0.354291	BDH2
ENSG00000270141.3	110.065	1.41526	0.63762	2.2196	0.0264459	0.354291	TERC
ENSG00000137310.12	143.049	1.39496	0.628662	2.21894	0.026491	0.354502	TCF19
ENSG00000172663.9	249.52	1.0195	0.459476	2.21883	0.0264985	0.354502	TMEM134
ENSG00000287277.1	35.697	-1.87782	0.846881	-2.21734	0.0266	0.354876	AL392086.3
ENSG00000112039.4	69.6398	1.29586	0.584292	2.21783	0.0265662	0.354876	FANCE
ENSG00000125869.10	79.1487	-1.36057	0.613554	-2.21753	0.0265869	0.354876	LAMP5
ENSG00000057294.14	17.2037	-2.76661	1.24766	-2.21744	0.0265928	0.354876	PKP2
ENSG00000184305.15	34.9381	-2.43441	1.09808	-2.21697	0.0266253	0.354967	CCSER1
ENSG00000106105.14	888.425	1.01227	0.456675	2.21661	0.0266495	0.355044	GARS
ENSG00000137094.14	534.267	1.39286	0.628455	2.21633	0.0266689	0.355058	DNAJB5
ENSG00000198034.11	982.926	1.10156	0.497146	2.21576	0.0267081	0.355334	RPS4X
ENSG00000203435.2	26.5031	-2.27561	1.02755	-2.2146	0.0267873	0.355802	E2F3P2
ENSG00000253741.2	59.6316	2.24208	1.0123	2.21483	0.0267715	0.355802	LNCOC1
ENSG00000133816.15	377.44	-1.09401	0.494035	-2.21444	0.0267987	0.355802	MICAL2
ENSG00000174145.8	18.3589	-2.88883	1.3047	-2.21417	0.0268174	0.355805	NWD2
ENSG00000197070.14	183.905	-0.95585	0.431823	-2.21352	0.0268616	0.355902	ARRDC1
ENSG00000177757.2	11.0814	-2.03985	0.921469	-2.21369	0.0268502	0.355902	FAM87B
ENSG00000106078.19	1266.39	-0.967862	0.437467	-2.21242	0.0269375	0.356455	COBL
ENSG00000169330.8	131.176	2.03874	0.921573	2.21224	0.02695	0.356455	MINAR1
ENSG00000165312.6	145.203	-1.19081	0.538315	-2.21211	0.0269588	0.356455	OTUD1
ENSG00000152910.19	154.901	-2.49979	1.13034	-2.21154	0.0269982	0.356616	CNTNAP4
ENSG00000154783.12	111.125	-1.43644	0.64964	-2.21114	0.0270265	0.356616	FGD5
ENSG00000131351.15	43.7788	1.39906	0.632712	2.21122	0.0270207	0.356616	HAUS8
ENSG00000122359.18	403.774	-1.12462	0.508693	-2.2108	0.0270499	0.356681	ANXA11
ENSG00000149679.11	194.302	1.15204	0.521396	2.20953	0.0271381	0.3576	CABLES2
ENSG00000157423.18	624.337	-1.9253	0.871471	-2.20925	0.027157	0.357604	HYDIN
ENSG00000023892.11	95.1602	-1.49859	0.678942	-2.20724	0.0272974	0.359208	DEF6
ENSG00000138190.17	129.323	-1.16551	0.528163	-2.20673	0.027333	0.359368	EXOC6
ENSG00000142599.19	1966.17	0.933881	0.423235	2.20653	0.0273469	0.359368	RERE
ENSG00000109625.19	22.3435	-2.71591	1.23179	-2.20485	0.0274647	0.36018	CPZ
ENSG00000141469.18	444.056	-4.11861	1.86781	-2.20505	0.0274508	0.36018	SLC14A1
ENSG00000167397.15	222.297	0.969069	0.439473	2.20507	0.0274491	0.36018	VKORC1
ENSG00000106268.15	47.9669	1.33413	0.605358	2.20386	0.027534	0.360843	NUDT1
ENSG00000109339.23	1537.17	-1.21267	0.550352	-2.20344	0.0275635	0.360985	MAPK10
ENSG00000141668.10	46.6944	-2.4662	1.11959	-2.20277	0.0276106	0.361356	CBLN2
ENSG00000165152.9	111.008	-1.75642	0.797635	-2.20203	0.0276632	0.361798	TMEM246
ENSG00000137309.19	733.984	1.3644	0.620249	2.19977	0.0278235	0.363402	HMGA1
ENSG00000197121.15	1599.36	1.0459	0.475413	2.19999	0.0278077	0.363402	PGAP1
ENSG00000033050.9	580.523	1.00458	0.457387	2.19635	0.0280669	0.363625	ABCF2
ENSG00000283312.1	15.3337	2.64897	1.20603	2.19645	0.02806	0.363625	AC017104.4
ENSG00000170209.5	14.1133	-2.62971	1.19722	-2.19651	0.0280557	0.363625	ANKK1
ENSG00000064012.21	84.1998	-1.22114	0.555289	-2.19911	0.0278703	0.363625	CASP8
ENSG00000138755.6	16.1383	-2.31424	1.05261	-2.19856	0.0279092	0.363625	CXCL9
ENSG00000172209.6	14.4555	-1.98042	0.901583	-2.1966	0.0280487	0.363625	GPR22
ENSG00000189159.16	552.24	1.51232	0.688425	2.19679	0.0280357	0.363625	JPT1
ENSG00000164344.16	33.3542	-2.43309	1.10712	-2.19769	0.0279715	0.363625	KLKB1
ENSG00000179630.11	53.395	-1.41244	0.642458	-2.19849	0.0279141	0.363625	LACC1
ENSG00000180543.5	88.2238	-1.52208	0.692402	-2.19826	0.0279306	0.363625	TSPYL5
ENSG00000176890.16	149.203	1.66372	0.757096	2.1975	0.0279844	0.363625	TYMS
ENSG00000243660.10	94.814	-1.51	0.687244	-2.19718	0.0280074	0.363625	ZNF487
ENSG00000179455.9	201.464	1.40736	0.641059	2.19537	0.0281369	0.364286	MKRN3
ENSG00000167306.20	265.272	2.36717	1.07878	2.19429	0.0282146	0.365047	MYO5B
ENSG00000227827.3	293.58	-0.955154	0.435443	-2.19352	0.0282696	0.365485	AC138969.2
ENSG00000196132.14	357.841	1.90727	0.869837	2.19268	0.0283308	0.365485	MYT1
ENSG00000213281.5	547.867	0.909666	0.414805	2.193	0.0283076	0.365485	NRAS
ENSG00000161970.15	666.793	0.927138	0.422751	2.19311	0.0282996	0.365485	RPL26
ENSG00000145040.4	17.8461	2.59016	1.18151	2.19224	0.0283621	0.365485	UCN2
ENSG00000267500.1	11.8579	2.31185	1.05444	2.19249	0.0283444	0.365485	ZNF887P
ENSG00000175445.17	1361.72	1.87311	0.854888	2.19106	0.0284475	0.36623	LPL
ENSG00000113407.13	443.433	0.854984	0.390241	2.19092	0.0284579	0.36623	TARS
ENSG00000057704.13	308.178	-1.29111	0.589475	-2.19027	0.0285046	0.366341	TMCC3
ENSG00000258405.11	80.4021	2.05691	0.939104	2.19029	0.028503	0.366341	ZNF578
ENSG00000280381.1	67.4388	-1.41771	0.647631	-2.18907	0.028592	0.366518	AC026362.2
ENSG00000151892.14	190.344	1.80386	0.82398	2.18921	0.0285817	0.366518	GFRA1
ENSG00000043462.12	294.533	-1.51419	0.691717	-2.18903	0.0285944	0.366518	LCP2
ENSG00000162062.15	49.7435	1.80034	0.822401	2.18913	0.0285876	0.366518	TEDC2
ENSG00000179454.13	307.442	0.946728	0.432567	2.18863	0.0286239	0.366652	KLHL28
ENSG00000162374.17	386.344	1.87502	0.856911	2.18811	0.0286613	0.366887	ELAVL4
ENSG00000167858.13	83.8421	-5.32338	2.43355	-2.1875	0.0287062	0.366975	TEKT1
ENSG00000269699.6	16.8782	-2.36124	1.07942	-2.1875	0.0287059	0.366975	ZIM2
ENSG00000236501.6	29.4618	3.11465	1.42416	2.18701	0.0287416	0.366982	AC074286.1
ENSG00000070669.17	376.308	1.19576	0.546791	2.18686	0.0287525	0.366982	ASNS
ENSG00000064787.13	381.29	-1.6114	0.73702	-2.18637	0.0287883	0.366982	BCAS1
ENSG00000071462.11	424.882	0.94817	0.433615	2.18667	0.0287669	0.366982	BUD23
ENSG00000160712.13	276.095	-1.14389	0.523235	-2.18619	0.0288019	0.366982	IL6R
ENSG00000165084.16	76.4192	-2.22996	1.02117	-2.18373	0.0289824	0.367338	C8orf34
ENSG00000063180.9	162.754	-1.38235	0.63277	-2.1846	0.0289179	0.367338	CA11
ENSG00000225492.6	26.0721	-1.64304	0.752018	-2.18485	0.0289001	0.367338	GBP1P1
ENSG00000164107.8	21.4988	3.24117	1.48423	2.18373	0.0289819	0.367338	HAND2
ENSG00000122778.9	935.064	1.44947	0.663606	2.18423	0.0289453	0.367338	KIAA1549
ENSG00000170011.14	114.515	-1.55741	0.712778	-2.18499	0.0288898	0.367338	MYRIP
ENSG00000166387.13	156.776	-1.41418	0.647576	-2.1838	0.0289772	0.367338	PPFIBP2
ENSG00000162814.11	55.5694	-1.80447	0.826258	-2.18391	0.0289688	0.367338	SPATA17
ENSG00000287431.1	73.1471	1.58633	0.72708	2.18178	0.0291255	0.367442	AC027601.6
ENSG00000285130.2	32.3798	-1.58852	0.72782	-2.18257	0.0290674	0.367442	AL358113.1
ENSG00000159314.11	315.132	-1.15599	0.529933	-2.1814	0.0291541	0.367442	ARHGAP27
ENSG00000087586.17	65.7604	1.27026	0.581823	2.18324	0.0290181	0.367442	AURKA
ENSG00000146094.14	192.887	-1.16871	0.535494	-2.18249	0.0290736	0.367442	DOK3
ENSG00000186281.12	15.2932	-1.95522	0.89583	-2.18258	0.029067	0.367442	GPAT2
ENSG00000171121.16	81.1255	-1.65589	0.758952	-2.18181	0.0291237	0.367442	KCNMB3
ENSG00000249274.1	31.681	-1.49126	0.683658	-2.18129	0.0291621	0.367442	PDLIM1P4
ENSG00000189190.10	45.1053	-1.38923	0.636658	-2.18207	0.0291041	0.367442	ZNF600
ENSG00000164930.12	112.125	-1.90619	0.874089	-2.18077	0.0292005	0.367686	FZD6
ENSG00000175155.10	317.812	-1.02186	0.468685	-2.18026	0.029238	0.367918	YPEL2
ENSG00000135638.14	23.0236	-2.58179	1.18432	-2.17998	0.0292591	0.367944	EMX1
ENSG00000141744.4	25.3703	-2.70515	1.24148	-2.17897	0.0293338	0.368642	PNMT
ENSG00000184113.9	306.634	-1.19456	0.548301	-2.17866	0.0293568	0.368691	CLDN5
ENSG00000197550.3	18.7114	3.57463	1.64111	2.17818	0.0293926	0.3689	AL359955.1
ENSG00000082482.13	15.4391	-1.85422	0.851435	-2.17775	0.0294244	0.369059	KCNK2
ENSG00000237352.4	14.2911	-1.75414	0.805977	-2.17641	0.0295244	0.369832	LINC01358
ENSG00000054219.11	92.9633	-1.58735	0.729267	-2.17664	0.0295073	0.369832	LY75
ENSG00000135931.17	299.116	-1.01017	0.464394	-2.17524	0.0296119	0.370459	ARMC9
ENSG00000188523.8	31.193	-2.17914	1.0018	-2.17523	0.0296129	0.370459	CFAP77
ENSG00000158406.4	404.285	1.6046	0.737822	2.17478	0.0296463	0.370637	HIST1H4H
ENSG00000122692.9	591.458	0.906235	0.416844	2.17404	0.0297021	0.371093	SMU1
ENSG00000197579.8	237.757	0.908036	0.417742	2.17367	0.0297296	0.371196	TOPORS
ENSG00000132170.21	21.2613	-1.84144	0.847329	-2.17323	0.0297629	0.371372	PPARG
ENSG00000099866.15	33.7736	2.05941	0.947814	2.1728	0.0297954	0.371537	MADCAM1
ENSG00000115844.11	28.1416	2.35658	1.08488	2.1722	0.0298408	0.371863	DLX2
ENSG00000108239.9	298.862	-1.13711	0.524223	-2.16913	0.0300729	0.374512	TBC1D12
ENSG00000173200.13	18.5812	-2.29435	1.05801	-2.16856	0.030116	0.374565	PARP15
ENSG00000154839.10	29.8102	1.73798	0.801351	2.16881	0.030097	0.374565	SKA1
ENSG00000139874.6	22.1755	-1.87911	0.866816	-2.16783	0.0301716	0.375015	SSTR1
ENSG00000241484.9	18.8399	-2.43305	1.12251	-2.16752	0.0301956	0.375071	ARHGAP8
ENSG00000180332.6	11.7466	-2.55431	1.17899	-2.16652	0.0302718	0.375765	KCTD4
ENSG00000181019.13	199.824	-1.44111	0.665247	-2.16627	0.0302905	0.375765	NQO1
ENSG00000154655.15	164.089	-1.39363	0.643738	-2.16491	0.0303949	0.375852	L3MBTL4
ENSG00000104886.11	258.554	1.00793	0.465574	2.16491	0.0303948	0.375852	PLEKHJ1
ENSG00000243244.6	461.592	-1.31811	0.60882	-2.16503	0.0303857	0.375852	STON1
ENSG00000171368.12	1481.58	-1.51929	0.701693	-2.16518	0.0303737	0.375852	TPPP
ENSG00000196655.12	180.491	0.945866	0.436832	2.16529	0.0303657	0.375852	TRAPPC4
ENSG00000173442.13	491.044	-0.882963	0.408038	-2.16392	0.0304702	0.376087	EHBP1L1
ENSG00000073350.13	57.2998	-1.64174	0.758697	-2.16389	0.0304725	0.376087	LLGL2
ENSG00000243406.6	80.7428	1.28904	0.595699	2.16392	0.0304707	0.376087	MRPS31P5
ENSG00000109436.8	345.478	-1.20598	0.557713	-2.16236	0.0305905	0.377303	TBC1D9
ENSG00000167772.12	440.356	1.53712	0.711174	2.16138	0.0306661	0.377511	ANGPTL4
ENSG00000048162.20	45.9554	1.21657	0.562746	2.16185	0.0306294	0.377511	NOP16
ENSG00000180440.4	12.3695	-2.95035	1.36501	-2.16141	0.0306637	0.377511	SERTM1
ENSG00000260914.3	232.507	0.923485	0.428016	2.1576	0.0309593	0.377978	AC026464.4
ENSG00000270562.1	10.1468	-2.22066	1.02867	-2.15876	0.0308689	0.377978	AC097634.1
ENSG00000151726.14	513.123	-1.13679	0.526672	-2.15844	0.0308936	0.377978	ACSL1
ENSG00000282988.2	537.77	1.6799	0.778624	2.15753	0.0309647	0.377978	AL031777.3
ENSG00000186635.14	1224.91	-0.898767	0.416669	-2.15703	0.0310034	0.377978	ARAP1
ENSG00000166669.13	36.7975	-1.6147	0.748713	-2.15664	0.0310341	0.377978	ATF7IP2
ENSG00000003402.20	1560.48	-1.00746	0.466656	-2.15888	0.0308592	0.377978	CFLAR
ENSG00000122547.11	448.57	1.26978	0.588024	2.1594	0.0308193	0.377978	EEPD1
ENSG00000161791.14	1828.46	-1.29383	0.599943	-2.15659	0.0310374	0.377978	FMNL3
ENSG00000102531.16	1441.15	0.825561	0.382245	2.15977	0.0307905	0.377978	FNDC3A
ENSG00000053254.15	966.813	-0.988124	0.458164	-2.1567	0.0310288	0.377978	FOXN3
ENSG00000160360.13	852.882	1.15542	0.535589	2.15729	0.0309829	0.377978	GPSM1
ENSG00000143630.10	120.63	1.3193	0.611523	2.1574	0.0309746	0.377978	HCN3
ENSG00000184611.12	117.758	2.34486	1.0859	2.15937	0.0308218	0.377978	KCNH7
ENSG00000129951.18	68.8811	2.10601	0.975309	2.15933	0.0308246	0.377978	PLPPR3
ENSG00000104889.6	87.7152	1.57877	0.731215	2.15911	0.0308415	0.377978	RNASEH2A
ENSG00000170396.8	18.0664	-2.33841	1.08323	-2.15874	0.03087	0.377978	ZNF804A
ENSG00000277152.1	56.5572	-1.89863	0.880809	-2.15555	0.0311186	0.378012	AC110048.2
ENSG00000145088.9	44.5537	-1.21107	0.561741	-2.15593	0.0310892	0.378012	EAF2
ENSG00000257108.2	14.5668	-2.43454	1.1294	-2.1556	0.0311152	0.378012	NHLRC4
ENSG00000198743.7	1965.75	0.945621	0.438669	2.15566	0.0311104	0.378012	SLC5A3
ENSG00000240086.7	20.125	-2.91961	1.35497	-2.15475	0.0311817	0.378539	AC092969.1
ENSG00000172331.12	149.457	0.897847	0.416962	2.15331	0.0312945	0.379649	BPGM
ENSG00000179604.10	1880.71	-1.11987	0.520141	-2.15301	0.031318	0.379649	CDC42EP4
ENSG00000138411.13	401.001	-1.1287	0.524289	-2.15283	0.0313322	0.379649	HECW2
ENSG00000145936.9	81.6128	-1.49385	0.694436	-2.15116	0.0314632	0.380109	KCNMB1
ENSG00000213424.9	12.617	-2.70401	1.25718	-2.15085	0.0314884	0.380109	KRT222
ENSG00000197275.14	62.0735	1.11029	0.5162	2.15089	0.031485	0.380109	RAD54B
ENSG00000072315.3	15.3155	-2.66812	1.24007	-2.15159	0.0314299	0.380109	TRPC5
ENSG00000196584.3	94.9395	1.64262	0.76343	2.15163	0.0314262	0.380109	XRCC2
ENSG00000130844.18	369.111	-1.21216	0.563526	-2.15103	0.0314742	0.380109	ZNF331
ENSG00000137343.18	567.509	1.31051	0.609643	2.14964	0.0315837	0.380295	ATAT1
ENSG00000006634.8	120.86	1.34201	0.624255	2.14977	0.0315734	0.380295	DBF4
ENSG00000154582.16	174.501	0.924158	0.429815	2.15013	0.0315449	0.380295	ELOC
ENSG00000185477.5	385.49	-1.60167	0.745156	-2.14944	0.0315998	0.380295	GPRIN3
ENSG00000068489.12	109.102	1.33604	0.621588	2.1494	0.0316025	0.380295	PRR11
ENSG00000205581.11	902.756	1.15751	0.539043	2.14734	0.0317664	0.382029	HMGN1
ENSG00000204060.7	38.3875	1.38466	0.645016	2.14671	0.0318162	0.382389	FOXO6
ENSG00000179593.16	12.8722	-1.76584	0.822991	-2.14563	0.0319022	0.382873	ALOX15B
ENSG00000164045.12	73.0464	1.57624	0.734608	2.14569	0.0318975	0.382873	CDC25A
ENSG00000265107.3	24.8038	-2.56027	1.19376	-2.14472	0.0319756	0.382873	GJA5
ENSG00000106355.10	218.002	1.18775	0.553674	2.14521	0.031936	0.382873	LSM5
ENSG00000285230.2	56.7161	1.14156	0.532253	2.14477	0.0319711	0.382873	RALY-AS1
ENSG00000104447.12	1383.21	-1.10371	0.514476	-2.14531	0.0319282	0.382873	TRPS1
ENSG00000115008.5	11.4474	-2.41049	1.1241	-2.14436	0.0320039	0.382974	IL1A
ENSG00000137100.16	254.634	1.08239	0.505022	2.14326	0.0320921	0.383791	DCTN3
ENSG00000148926.10	910.47	1.48271	0.692114	2.14229	0.0321702	0.384011	ADM
ENSG00000196104.11	117.813	-2.56218	1.19572	-2.14278	0.0321306	0.384011	SPOCK3
ENSG00000187824.8	73.0096	-1.36498	0.637131	-2.14239	0.0321623	0.384011	TMEM220
ENSG00000127564.17	107.972	1.76636	0.824855	2.14142	0.0322405	0.384611	PKMYT1
ENSG00000104327.7	76.2325	-4.30211	2.00954	-2.14084	0.0322867	0.384686	CALB1
ENSG00000071564.16	723.806	0.891736	0.416512	2.14096	0.0322773	0.384686	TCF3
ENSG00000162706.13	1558.38	-1.56969	0.733624	-2.13964	0.032384	0.385131	CADM3
ENSG00000100473.18	14.8334	2.32541	1.08678	2.13972	0.0323776	0.385131	COCH
ENSG00000237484.6	19.2567	-2.21514	1.03522	-2.13979	0.0323721	0.385131	LINC01684
ENSG00000159131.17	690.93	1.01058	0.472394	2.13928	0.0324132	0.385241	GART
ENSG00000122729.19	407.953	0.893499	0.418224	2.13641	0.0326458	0.386082	ACO1
ENSG00000197536.11	350.469	-1.13933	0.532963	-2.13773	0.032539	0.386082	C5orf56
ENSG00000106477.19	468.279	1.00012	0.468286	2.1357	0.0327042	0.386082	CEP41
ENSG00000024526.17	65.0866	1.79552	0.840343	2.13665	0.0326266	0.386082	DEPDC1
ENSG00000174804.4	317.145	-1.02878	0.481265	-2.13767	0.0325436	0.386082	FZD4
ENSG00000274290.2	207.757	1.57251	0.736266	2.13579	0.0326965	0.386082	HIST1H2BE
ENSG00000186395.8	84.7318	1.16346	0.544621	2.13628	0.0326565	0.386082	KRT10
ENSG00000269313.5	23.3173	-1.55575	0.728344	-2.13601	0.0326788	0.386082	MAGIX
ENSG00000172403.11	160.513	-1.2808	0.599574	-2.13619	0.0326643	0.386082	SYNPO2
ENSG00000184988.8	162.069	-1.29982	0.608528	-2.13601	0.0326785	0.386082	TMEM106A
ENSG00000176040.13	11.17	-3.27451	1.53308	-2.1359	0.0326878	0.386082	TMPRSS7
ENSG00000106244.13	636.639	0.872229	0.408562	2.13488	0.0327712	0.386636	PDAP1
ENSG00000198937.9	58.3022	1.28222	0.600866	2.13396	0.0328464	0.387286	CCDC167
ENSG00000246465.1	13.6817	2.82951	1.3266	2.1329	0.0329331	0.388071	AC138904.1
ENSG00000138639.18	163.301	-1.61668	0.758253	-2.13211	0.0329976	0.388119	ARHGAP24
ENSG00000196361.10	1090.64	1.33901	0.628004	2.13218	0.0329924	0.388119	ELAVL3
ENSG00000103202.13	445.676	0.826055	0.387398	2.13232	0.0329808	0.388119	NME4
ENSG00000203930.12	4498.74	-2.27716	1.0682	-2.13177	0.0330256	0.388211	LINC00632
ENSG00000170632.14	275.896	0.884977	0.415239	2.13125	0.0330688	0.388483	ARMC10
ENSG00000112309.11	410.37	-2.05095	0.962898	-2.12998	0.0331733	0.389056	B3GAT2
ENSG00000169282.17	70.0333	-1.52028	0.713616	-2.13039	0.0331392	0.389056	KCNAB1
ENSG00000102524.11	171.627	-1.36238	0.639638	-2.12992	0.0331781	0.389056	TNFSF13B
ENSG00000155324.10	929.994	-1.47465	0.692731	-2.12874	0.0332756	0.389356	GRAMD2B
ENSG00000111110.12	188.703	-1.31551	0.617834	-2.12923	0.0332354	0.389356	PPM1H
ENSG00000075223.14	72.079	-1.11221	0.52255	-2.12842	0.033302	0.389356	SEMA3C
ENSG00000109689.16	596.826	-0.91488	0.429797	-2.12864	0.0332845	0.389356	STIM2
ENSG00000161642.17	607.861	-1.06381	0.49982	-2.12839	0.0333047	0.389356	ZNF385A
ENSG00000223953.6	263.375	-1.25928	0.59204	-2.12702	0.0334187	0.389388	C1QTNF5
ENSG00000161040.16	54.3832	-1.65541	0.778499	-2.12641	0.033469	0.389388	FBXL13
ENSG00000130520.10	295.536	0.885823	0.416329	2.1277	0.0333621	0.389388	LSM4
ENSG00000133606.11	735.164	0.842822	0.396185	2.12734	0.0333915	0.389388	MKRN1
ENSG00000090097.21	905.944	1.01829	0.478772	2.12688	0.0334299	0.389388	PCBP4
ENSG00000182378.14	242.657	1.06098	0.498594	2.12794	0.0333424	0.389388	PLCXD1
ENSG00000179967.11	29.3333	1.62539	0.764104	2.12718	0.0334047	0.389388	PPP1R14BP3
ENSG00000101695.9	39.2537	-1.72682	0.812074	-2.12643	0.0334674	0.389388	RNF125
ENSG00000170485.17	376.333	-1.36835	0.643688	-2.12579	0.0335206	0.389532	NPAS2
ENSG00000114115.10	240.712	1.36452	0.641892	2.12578	0.0335218	0.389532	RBP1
ENSG00000134014.17	327.076	0.889235	0.418425	2.12519	0.0335705	0.389757	ELP3
ENSG00000274020.4	217.209	-1.1362	0.53467	-2.12506	0.0335817	0.389757	LINC01138
ENSG00000007933.13	10.9191	-3.01896	1.42291	-2.12167	0.0338653	0.39187	FMO3
ENSG00000131196.17	182.968	-1.19445	0.562889	-2.12201	0.033837	0.39187	NFATC1
ENSG00000132554.20	85.5378	-1.54915	0.730151	-2.12169	0.0338641	0.39187	RGS22
ENSG00000180113.16	42.2284	-1.63646	0.771296	-2.1217	0.0338632	0.39187	TDRD6
ENSG00000138311.17	194.56	-1.34515	0.633775	-2.12245	0.0338002	0.39187	ZNF365
ENSG00000273295.1	70.035	2.31444	1.09114	2.12112	0.0339117	0.392171	AP000350.6
ENSG00000145246.14	397.298	-1.0405	0.490746	-2.12024	0.0339856	0.392555	ATP10D
ENSG00000164879.7	71.0609	-1.66358	0.784571	-2.12036	0.0339754	0.392555	CA3
ENSG00000260920.2	61.3097	1.22972	0.580088	2.11988	0.0340162	0.392673	AL031985.3
ENSG00000162747.11	55.2863	-1.60232	0.756075	-2.11926	0.0340685	0.392806	FCGR3B
ENSG00000216624.3	16.3337	1.7088	0.806315	2.11927	0.0340674	0.392806	GAPDHP72
ENSG00000065809.13	274.498	-1.07234	0.506121	-2.11874	0.0341128	0.393082	FAM107B
ENSG00000282608.1	147.997	-1.51211	0.713808	-2.11837	0.0341435	0.393201	ADORA3
ENSG00000166278.15	359.088	-1.65249	0.780497	-2.11723	0.0342407	0.393584	C2
ENSG00000106665.15	3369.78	0.972402	0.459189	2.11765	0.0342049	0.393584	CLIP2
ENSG00000106823.12	204.666	-1.40014	0.661523	-2.11654	0.0342993	0.393584	ECM2
ENSG00000165175.15	737.441	-0.877595	0.414457	-2.11746	0.0342212	0.393584	MID1IP1
ENSG00000013375.16	452.087	1.07786	0.509253	2.11656	0.0342975	0.393584	PGM3
ENSG00000211455.8	418.373	-1.00557	0.475006	-2.11696	0.0342629	0.393584	STK38L
ENSG00000185046.18	297.972	-1.25859	0.594912	-2.1156	0.0343791	0.394031	ANKS1B
ENSG00000211772.11	14.0151	-2.26409	1.07016	-2.11565	0.0343745	0.394031	TRBC2
ENSG00000123191.14	164.621	1.47519	0.697525	2.1149	0.0344389	0.394332	ATP7B
ENSG00000047056.16	321.695	-0.914407	0.432383	-2.11481	0.0344463	0.394332	WDR37
ENSG00000102053.12	22.9823	-2.28602	1.08113	-2.11447	0.0344749	0.394425	ZC3H12B
ENSG00000109805.10	103.874	1.47747	0.699043	2.11356	0.0345525	0.394676	NCAPG
ENSG00000171033.13	689.149	1.7324	0.819518	2.11393	0.0345213	0.394676	PKIA
ENSG00000227199.1	36.2998	1.5612	0.73868	2.1135	0.0345582	0.394676	ST7-AS1
ENSG00000283378.1	22.2026	-2.55605	1.21054	-2.1115	0.0347296	0.396399	CNTNAP3C
ENSG00000258926.2	30.4317	-2.16158	1.02471	-2.10945	0.0349058	0.398174	AL355916.2
ENSG00000109667.12	46.5743	-1.49969	0.711317	-2.10833	0.0350023	0.398803	SLC2A9
ENSG00000089060.11	347.404	-1.13581	0.538712	-2.10838	0.0349979	0.398803	SLC8B1
ENSG00000138185.20	616.447	-1.31722	0.625047	-2.10739	0.0350842	0.3995	ENTPD1
ENSG00000281404.2	101.548	-1.27868	0.607124	-2.10612	0.0351938	0.400511	LINC01176
ENSG00000166924.9	474.847	1.07151	0.508965	2.10527	0.0352677	0.401116	NYAP1
ENSG00000278231.1	14.9335	-1.93873	0.921075	-2.10485	0.0353041	0.401131	AL133342.1
ENSG00000103507.14	428.504	0.9201	0.437297	2.10406	0.0353731	0.401131	BCKDK
ENSG00000152076.18	95.7378	-1.23589	0.587261	-2.1045	0.0353345	0.401131	CCDC74B
ENSG00000178685.14	738.315	-1.19205	0.566532	-2.10412	0.0353679	0.401131	PARP10
ENSG00000278274.1	19.4125	-1.76911	0.840651	-2.10445	0.0353394	0.401131	SNORA61
ENSG00000156869.13	26.3625	-1.91384	0.909855	-2.10346	0.0354257	0.401366	FRRS1
ENSG00000091127.14	162.526	1.07685	0.511969	2.10335	0.0354355	0.401366	PUS7
ENSG00000224746.2	11.802	2.63973	1.25678	2.1004	0.0356939	0.401863	AC015987.1
ENSG00000115361.8	15.7127	-2.2748	1.08298	-2.10051	0.0356843	0.401863	ACADL
ENSG00000146731.11	889.362	0.970908	0.461977	2.10164	0.0355851	0.401863	CCT6A
ENSG00000165959.12	337.962	-1.1621	0.553177	-2.10078	0.0356603	0.401863	CLMN
ENSG00000163106.11	31.6446	-2.20751	1.05006	-2.10228	0.035529	0.401863	HPGDS
ENSG00000146674.15	2563.61	2.41635	1.14989	2.10138	0.0356077	0.401863	IGFBP3
ENSG00000167977.9	410.619	0.978263	0.465715	2.10056	0.0356795	0.401863	KCTD5
ENSG00000257135.7	32.63	1.69558	0.806845	2.10149	0.0355979	0.401863	ODC1-DT
ENSG00000170909.13	45.5951	-1.37943	0.65651	-2.10116	0.0356269	0.401863	OSCAR
ENSG00000188313.13	415.786	-1.1174	0.531488	-2.10239	0.035519	0.401863	PLSCR1
ENSG00000198901.14	151.433	1.34001	0.638031	2.10023	0.0357086	0.401863	PRC1
ENSG00000284685.1	35.5876	-1.65347	0.787963	-2.0984	0.0358694	0.402458	AC009093.10
ENSG00000163879.11	563.442	-1.44993	0.69106	-2.09813	0.0358938	0.402458	DNALI1
ENSG00000122550.18	485.736	0.928025	0.442344	2.09797	0.0359076	0.402458	KLHL7
ENSG00000138722.10	47.5295	-1.33395	0.635513	-2.09901	0.0358158	0.402458	MMRN1
ENSG00000168004.9	44.8275	-1.62441	0.773794	-2.09928	0.0357924	0.402458	PLAAT5
ENSG00000122779.18	1175.94	1.13243	0.53963	2.09854	0.0358579	0.402458	TRIM24
ENSG00000137766.17	66.3639	-2.09116	0.996368	-2.09879	0.0358356	0.402458	UNC13C
ENSG00000006740.17	84.8343	-1.57628	0.751755	-2.0968	0.0360113	0.402713	ARHGAP44
ENSG00000055813.6	35.5415	-1.73544	0.827767	-2.09653	0.0360349	0.402713	CCDC85A
ENSG00000213221.5	46.4216	1.30137	0.620692	2.09664	0.0360257	0.402713	DNLZ
ENSG00000189320.9	63.0466	2.78107	1.32614	2.09713	0.0359823	0.402713	FAM180A
ENSG00000163644.15	843.106	-1.17382	0.559869	-2.09659	0.0360295	0.402713	PPM1K
ENSG00000154640.14	177.955	0.893451	0.42627	2.09598	0.0360843	0.403032	BTG3
ENSG00000246985.8	23.5255	-1.90043	0.907022	-2.09525	0.036149	0.403521	SOCS2-AS1
ENSG00000102384.13	56.0143	1.32983	0.63493	2.09445	0.0362198	0.403689	CENPI
ENSG00000164530.15	131.508	-2.33988	1.11722	-2.09437	0.0362268	0.403689	PI16
ENSG00000186866.16	578.331	0.863917	0.412447	2.09461	0.0362055	0.403689	POFUT2
ENSG00000197580.12	108.925	-1.96559	0.938936	-2.09342	0.0363115	0.404398	BCO2
ENSG00000174004.6	84.7683	-1.44774	0.691953	-2.09226	0.0364155	0.405322	NRROS
ENSG00000134057.15	154.787	1.39865	0.668735	2.09149	0.0364843	0.405854	CCNB1
ENSG00000152380.10	31.1514	-1.45226	0.694615	-2.09074	0.0365512	0.405895	FAM151B
ENSG00000080709.15	137.823	-1.56633	0.749121	-2.09089	0.0365383	0.405895	KCNN2
ENSG00000077616.11	40.8213	-1.94097	0.928265	-2.09097	0.0365311	0.405895	NAALAD2
ENSG00000216775.3	112.413	1.24449	0.595595	2.08949	0.0366633	0.406393	AL109918.1
ENSG00000139880.19	235.099	1.51875	0.726681	2.08998	0.0366195	0.406393	CDH24
ENSG00000187957.8	2141.77	1.30387	0.624068	2.0893	0.0366803	0.406393	DNER
ENSG00000164136.17	26.8853	-1.80944	0.865874	-2.08973	0.0366418	0.406393	IL15
ENSG00000280079.1	22.5941	1.93535	0.926677	2.08849	0.036754	0.406668	AC011447.7
ENSG00000197587.10	16.9878	2.5004	1.1971	2.08871	0.0367338	0.406668	DMBX1
ENSG00000130590.14	108.444	1.17321	0.561797	2.08833	0.0367685	0.406668	SAMD10
ENSG00000118432.12	1168.82	1.20943	0.579591	2.0867	0.0369152	0.407937	CNR1
ENSG00000196109.9	21.6308	2.83425	1.35832	2.08659	0.0369255	0.407937	ZNF676
ENSG00000233264.2	71.6963	2.42504	1.16253	2.086	0.0369785	0.408054	AC006042.3
ENSG00000040933.15	1182.71	-0.885488	0.424445	-2.08623	0.0369581	0.408054	INPP4A
ENSG00000269091.6	13.3371	-2.42238	1.16156	-2.08546	0.0370278	0.408365	AC010624.3
ENSG00000277157.1	149.975	1.63964	0.786708	2.08419	0.0371433	0.409405	HIST1H4D
ENSG00000173762.8	12.2038	-2.13694	1.02581	-2.08318	0.0372351	0.410182	CD7
ENSG00000260949.1	23.1331	2.31557	1.11174	2.08283	0.0372668	0.410297	AP006545.1
ENSG00000154265.16	308.471	-1.48486	0.713009	-2.08252	0.037295	0.410373	ABCA5
ENSG00000115194.11	53.8427	-2.08809	1.00304	-2.08176	0.0373643	0.410901	SLC30A3
ENSG00000226053.1	15.8883	2.00269	0.962202	2.08136	0.0374009	0.411068	LINC01776
ENSG00000144583.5	109.146	1.83861	0.883648	2.0807	0.0374614	0.411499	MARCH4
ENSG00000160256.13	53.9327	1.04324	0.5015	2.08023	0.0375042	0.411734	FAM207A
ENSG00000116254.18	397.602	-1.68744	0.811334	-2.07983	0.037541	0.411783	CHD5
ENSG00000226067.7	99.0935	-1.10828	0.533077	-2.07902	0.0376154	0.411783	LINC00623
ENSG00000006576.16	363.684	1.13207	0.5445	2.0791	0.0376078	0.411783	PHTF2
ENSG00000164610.9	58.8411	1.2189	0.58617	2.07943	0.0375783	0.411783	RP9
ENSG00000108106.14	410.995	1.49033	0.716742	2.07931	0.0375888	0.411783	UBE2S
ENSG00000279175.1	36.2284	-1.60516	0.77312	-2.07621	0.0378749	0.41218	AL033543.1
ENSG00000152804.11	36.306	-1.76261	0.849012	-2.07608	0.0378869	0.41218	HHEX
ENSG00000150540.14	225.763	-0.906078	0.436163	-2.07738	0.0377663	0.41218	HNMT
ENSG00000135519.8	158.154	-1.40456	0.676274	-2.07692	0.0378094	0.41218	KCNH3
ENSG00000261455.1	81.0693	1.20764	0.581238	2.07771	0.0377363	0.41218	LINC01003
ENSG00000165072.10	25.9226	-1.84336	0.887699	-2.07656	0.0378421	0.41218	MAMDC2
ENSG00000141639.12	1065.35	-1.35797	0.653941	-2.07659	0.0378392	0.41218	MAPK4
ENSG00000257612.2	18.2043	2.1614	1.04104	2.07619	0.0378759	0.41218	MIR4307HG
ENSG00000160796.17	381.57	-1.02082	0.491327	-2.07769	0.0377381	0.41218	NBEAL2
ENSG00000256338.2	41.4261	1.62012	0.779616	2.0781	0.0377	0.41218	RPL41P2
ENSG00000188001.10	54.8745	-1.65113	0.795096	-2.07664	0.0378344	0.41218	TPRG1
ENSG00000271141.1	10.6103	2.38081	1.147	2.07567	0.0379243	0.412355	AC010680.4
ENSG00000089472.16	209.274	-1.35941	0.655199	-2.0748	0.0380052	0.413002	HEPH
ENSG00000280351.2	30.0829	1.26874	0.611994	2.07313	0.0381599	0.413548	AC127496.7
ENSG00000106305.10	159.349	1.07984	0.520998	2.07264	0.0382057	0.413548	AIMP2
ENSG00000154529.14	508.466	-1.52709	0.736388	-2.07376	0.038102	0.413548	CNTNAP3B
ENSG00000151883.18	335.099	-0.981213	0.473103	-2.074	0.0380796	0.413548	PARP8
ENSG00000187800.13	60.4772	-1.20563	0.581543	-2.07316	0.0381572	0.413548	PEAR1
ENSG00000114698.15	392.138	-1.25515	0.605484	-2.07296	0.0381757	0.413548	PLSCR4
ENSG00000225648.5	196.418	0.938248	0.452635	2.07286	0.0381854	0.413548	SBDSP1
ENSG00000241685.10	658.343	1.02061	0.492615	2.07181	0.0382827	0.413917	ARPC1A
ENSG00000126860.11	84.5819	-1.72017	0.8302	-2.07199	0.0382664	0.413917	EVI2A
ENSG00000273419.1	47.866	1.61579	0.780998	2.06887	0.038558	0.414874	AC004877.1
ENSG00000223559.1	10.2593	2.06237	0.997574	2.06739	0.0386973	0.414874	AC073136.1
ENSG00000259251.2	14.7002	-2.33669	1.12928	-2.06919	0.0385285	0.414874	AC104590.1
ENSG00000235875.3	11.5826	2.62033	1.26597	2.06982	0.0384688	0.414874	ARHGEF7-AS2
ENSG00000172346.15	157.291	1.34989	0.652862	2.06765	0.0386727	0.414874	CSDC2
ENSG00000155792.10	75.9008	-1.43906	0.695683	-2.06856	0.0385872	0.414874	DEPTOR
ENSG00000130244.12	166.622	0.960279	0.464583	2.06697	0.0387371	0.414874	FAM98C
ENSG00000183161.5	153.462	1.09302	0.528433	2.06841	0.0386015	0.414874	FANCF
ENSG00000110195.13	38.0906	-2.07085	1.00167	-2.0674	0.0386962	0.414874	FOLR1
ENSG00000156486.8	30.7134	-2.348	1.13596	-2.06698	0.0387359	0.414874	KCNS2
ENSG00000213160.10	280.983	1.12686	0.544446	2.06974	0.0384764	0.414874	KLHL23
ENSG00000249464.6	24.4988	-1.75128	0.846625	-2.06854	0.0385894	0.414874	LINC01091
ENSG00000176840.12	26.8227	2.14418	1.03672	2.06824	0.0386176	0.414874	MIR7-3HG
ENSG00000168256.18	382.983	1.08846	0.525823	2.07001	0.0384515	0.414874	NKIRAS2
ENSG00000186838.13	12.5982	2.2426	1.08392	2.06898	0.0385476	0.414874	SELENOV
ENSG00000161860.8	11.6607	2.48184	1.19982	2.06852	0.0385912	0.414874	SYCE2
ENSG00000260903.3	101.057	2.19424	1.06154	2.06703	0.0387317	0.414874	XKR7
ENSG00000115825.10	486.606	-0.834264	0.403859	-2.06573	0.038854	0.415895	PRKD3
ENSG00000148773.14	586.156	1.47604	0.714691	2.06528	0.0388961	0.416115	MKI67
ENSG00000146555.19	294.882	-1.65883	0.803515	-2.06447	0.038973	0.416706	SDK1
ENSG00000286965.1	32.2105	-2.26141	1.09563	-2.06402	0.0390162	0.41677	AC108066.2
ENSG00000128590.5	369.78	1.10065	0.533331	2.06372	0.0390438	0.41677	DNAJB9
ENSG00000129559.13	275.154	0.979514	0.474608	2.06384	0.0390331	0.41677	NEDD8
ENSG00000250687.6	21.0098	-3.15504	1.52918	-2.06322	0.0390918	0.416772	AC146944.2
ENSG00000147604.14	789.525	0.831056	0.40277	2.06335	0.039079	0.416772	RPL7
ENSG00000137571.11	95.8598	2.16468	1.04927	2.06304	0.0391088	0.416772	SLCO5A1
ENSG00000169255.15	365.5	0.958688	0.464885	2.06221	0.0391882	0.417371	B3GALNT1
ENSG00000075218.19	102.195	1.48634	0.720917	2.06173	0.0392335	0.417371	GTSE1
ENSG00000135378.4	29.4247	-1.79092	0.868558	-2.06194	0.0392134	0.417371	PRRG4
ENSG00000121900.19	157.768	0.99417	0.482247	2.06154	0.0392517	0.417371	TMEM54
ENSG00000120833.14	240.262	-1.91253	0.928142	-2.0606	0.0393409	0.418089	SOCS2
ENSG00000110436.13	9994.11	-1.22079	0.592571	-2.06015	0.0393841	0.418317	SLC1A2
ENSG00000121064.12	251.533	-1.02238	0.496332	-2.05986	0.0394117	0.41838	SCPEP1
ENSG00000011332.19	237.838	0.986487	0.479052	2.05925	0.0394706	0.418545	DPF1
ENSG00000176170.13	118.828	1.89929	0.922265	2.05937	0.0394586	0.418545	SPHK1
ENSG00000286835.1	12.3519	1.96496	0.954583	2.05844	0.0395475	0.41913	AL133477.2
ENSG00000095059.16	359.211	0.84685	0.411523	2.05784	0.039605	0.419509	DHPS
ENSG00000203747.11	941.369	-1.43604	0.698142	-2.05695	0.039691	0.420188	FCGR3A
ENSG00000183049.12	584.309	-1.08022	0.525222	-2.05669	0.0397165	0.420192	CAMK1D
ENSG00000196155.13	30.4391	-1.84594	0.897616	-2.05649	0.0397349	0.420192	PLEKHG4
ENSG00000106263.18	1242.7	0.916729	0.445892	2.05594	0.0397879	0.420257	EIF3B
ENSG00000181588.16	324.025	1.03792	0.504843	2.05592	0.0397905	0.420257	MEX3D
ENSG00000178814.17	136.132	-1.37593	0.669305	-2.05575	0.0398065	0.420257	OPLAH
ENSG00000131473.17	2114.22	1.15305	0.561051	2.05516	0.0398635	0.420629	ACLY
ENSG00000214485.6	89.6392	1.05188	0.511986	2.0545	0.0399269	0.421067	RPL7P1
ENSG00000182670.13	3783.15	1.11702	0.543805	2.05407	0.0399685	0.421275	TTC3
ENSG00000121797.10	16.5746	-1.71391	0.834825	-2.05301	0.0400714	0.421484	CCRL2
ENSG00000206530.11	258.147	-1.17448	0.57198	-2.05337	0.0400371	0.421484	CFAP44
ENSG00000107864.15	207.167	-1.15328	0.561783	-2.05289	0.0400833	0.421484	CPEB3
ENSG00000070731.11	73.5914	-2.20388	1.07361	-2.05277	0.0400945	0.421484	ST6GALNAC2
ENSG00000183066.14	16.7766	-2.3406	1.14023	-2.05274	0.0400976	0.421484	WBP2NL
ENSG00000245648.2	72.1238	2.5565	1.24569	2.05228	0.0401426	0.421497	AC022075.1
ENSG00000183662.11	11.5803	-2.8081	1.36814	-2.0525	0.0401214	0.421497	TAFA1
ENSG00000187676.8	223.105	-1.41357	0.689059	-2.05145	0.0402231	0.422112	B3GLCT
ENSG00000143147.14	397.938	1.09631	0.534693	2.05035	0.0403303	0.422554	GPR161
ENSG00000115457.10	2835.53	1.43503	0.699854	2.05047	0.040319	0.422554	IGFBP2
ENSG00000177425.11	102.129	-1.56524	0.763404	-2.05034	0.0403309	0.422554	PAWR
ENSG00000280087.1	35.4368	-1.46098	0.71269	-2.04996	0.0403685	0.422718	AC011481.3
ENSG00000173013.6	29.0184	-1.87628	0.915434	-2.04961	0.040403	0.42285	CCDC96
ENSG00000284624.1	36.9602	-2.09665	1.02391	-2.04769	0.04059	0.422947	AC092902.4
ENSG00000106992.19	372.859	-1.4046	0.686105	-2.04721	0.0406376	0.422947	AK1
ENSG00000169136.11	351.124	0.93225	0.455065	2.04861	0.0405005	0.422947	ATF5
ENSG00000198851.9	10.7237	-2.68013	1.30854	-2.04818	0.0405428	0.422947	CD3E
ENSG00000104885.18	899.527	0.931218	0.454986	2.0467	0.0406879	0.422947	DOT1L
ENSG00000175497.16	89.1896	-1.91989	0.937469	-2.04795	0.0405647	0.422947	DPP10
ENSG00000167779.9	113.137	2.17294	1.06169	2.04668	0.0406895	0.422947	IGFBP6
ENSG00000263528.8	118.322	-1.28645	0.627972	-2.04857	0.040504	0.422947	IKBKE
ENSG00000143473.13	140.453	-1.56342	0.763913	-2.0466	0.0406975	0.422947	KCNH1
ENSG00000227128.5	19.412	2.30126	1.12464	2.04621	0.0407357	0.422947	LBX1-AS1
ENSG00000188130.14	347.82	1.0528	0.514268	2.04718	0.0406407	0.422947	MAPK12
ENSG00000185818.7	1666.23	-1.00595	0.491459	-2.04686	0.0406721	0.422947	NAT8L
ENSG00000181322.14	32.2238	-1.8019	0.879799	-2.04808	0.0405517	0.422947	NME9
ENSG00000171858.18	461.385	1.02531	0.501093	2.04615	0.0407414	0.422947	RPS21
ENSG00000149131.15	1270.58	-1.60983	0.786374	-2.04716	0.0406428	0.422947	SERPING1
ENSG00000244198.7	37.2679	-1.41499	0.692457	-2.04343	0.0410097	0.423722	AC004889.1
ENSG00000261135.1	23.7944	2.09497	1.0253	2.04326	0.0410263	0.423722	AL137802.2
ENSG00000103599.20	70.0037	-1.60627	0.786148	-2.04321	0.0410316	0.423722	IQCH
ENSG00000187715.13	25.3684	-1.68456	0.824519	-2.04308	0.0410445	0.423722	KBTBD12
ENSG00000005302.19	234.721	-0.886095	0.433548	-2.04382	0.0409711	0.423722	MSL3
ENSG00000113231.13	352.562	-1.06857	0.522757	-2.0441	0.0409436	0.423722	PDE8B
ENSG00000026297.15	628.364	-1.24162	0.607418	-2.04409	0.0409442	0.423722	RNASET2
ENSG00000163535.18	131.644	1.00622	0.492345	2.04373	0.0409805	0.423722	SGO2
ENSG00000074317.11	302.694	-1.62024	0.79309	-2.04295	0.0410579	0.423722	SNCB
ENSG00000207008.1	144.018	-1.28851	0.630393	-2.04398	0.0409557	0.423722	SNORA54
ENSG00000177683.14	443.263	0.933334	0.456524	2.04444	0.0409104	0.423722	THAP5
ENSG00000166851.15	165.493	1.43986	0.704956	2.04248	0.0411043	0.423975	PLK1
ENSG00000196557.13	259.949	1.59963	0.783502	2.04165	0.0411866	0.424369	CACNA1H
ENSG00000188783.6	171.199	-1.45948	0.714825	-2.04173	0.0411779	0.424369	PRELP
ENSG00000165995.20	185.233	-1.31755	0.646047	-2.0394	0.0414104	0.426083	CACNB2
ENSG00000169122.11	450.628	1.04062	0.510228	2.03951	0.0413989	0.426083	FAM110B
ENSG00000175221.15	675.016	1.05259	0.51615	2.03931	0.0414192	0.426083	MED16
ENSG00000127957.18	128.852	1.30064	0.637995	2.03863	0.0414867	0.426549	PMS2P3
ENSG00000278705.1	197.116	1.47664	0.724445	2.0383	0.0415196	0.426661	HIST1H4B
ENSG00000126259.19	43.991	1.47164	0.722158	2.03783	0.0415669	0.426919	KIRREL2
ENSG00000151640.13	283.463	1.29301	0.634679	2.03727	0.0416231	0.427041	DPYSL4
ENSG00000144290.17	229.978	-1.66021	0.81488	-2.03737	0.0416134	0.427041	SLC4A10
ENSG00000163815.6	62.2429	-2.30332	1.13079	-2.03691	0.0416596	0.427158	CLEC3B
ENSG00000178104.19	4252.02	-1.05801	0.519468	-2.03671	0.0416789	0.427158	PDE4DIP
ENSG00000157514.16	639.968	-1.23574	0.606907	-2.03613	0.0417375	0.427532	TSC22D3
ENSG00000230798.5	19.6088	1.51944	0.746425	2.03562	0.0417888	0.42783	FOXD3-AS1
ENSG00000270953.1	120.074	1.67768	0.824439	2.03493	0.041858	0.427901	AC007938.3
ENSG00000144119.4	20.2774	-1.69591	0.833249	-2.0353	0.0418204	0.427901	C1QL2
ENSG00000167721.10	484.636	0.98324	0.483192	2.03489	0.0418622	0.427901	TSR1
ENSG00000106330.12	172.04	0.992969	0.488069	2.03448	0.0419029	0.427925	MOSPD3
ENSG00000108370.17	104.762	-1.5346	0.754319	-2.03442	0.041909	0.427925	RGS9
ENSG00000188921.14	74.855	-1.4606	0.718097	-2.03399	0.0419531	0.428148	HACD4
ENSG00000180354.16	2631.33	-1.1302	0.555794	-2.03348	0.0420037	0.428438	MTURN
ENSG00000134184.13	42.3886	1.90709	0.938051	2.03303	0.0420491	0.428674	GSTM1
ENSG00000158164.7	17.0585	3.02445	1.48795	2.03263	0.0420902	0.428866	TMSB15A
ENSG00000117411.16	465.409	0.912953	0.449261	2.03212	0.0421416	0.429163	B4GALT2
ENSG00000169679.15	113.595	1.40609	0.692108	2.0316	0.0421938	0.429241	BUB1
ENSG00000118193.12	85.0325	1.33793	0.658495	2.0318	0.0421739	0.429241	KIF14
ENSG00000283128.2	53.4611	2.22995	1.09787	2.03117	0.0422374	0.429459	AC009403.2
ENSG00000004660.15	205.321	-1.44024	0.709181	-2.03084	0.0422708	0.429572	CAMKK1
ENSG00000021826.16	105.171	-1.68063	0.827903	-2.02999	0.0423576	0.430226	CPS1
ENSG00000100526.20	17.2673	1.77375	0.87411	2.02921	0.0424369	0.430804	CDKN3
ENSG00000263069.6	135.099	-1.43966	0.709546	-2.02899	0.0424597	0.430809	RNF213-AS1
ENSG00000249141.1	15.4099	-1.8819	0.927871	-2.02819	0.0425407	0.431198	AL159163.1
ENSG00000157916.20	818.451	0.895952	0.441753	2.02817	0.0425427	0.431198	RER1
ENSG00000128510.12	29.1182	1.48564	0.732584	2.02795	0.0425653	0.431201	CPA4
ENSG00000133103.17	271.236	1.18771	0.585957	2.02695	0.0426673	0.43125	COG6
ENSG00000179958.9	162.153	1.07122	0.528398	2.0273	0.0426315	0.43125	DCTPP1
ENSG00000226604.2	31.6049	-2.23246	1.10137	-2.02698	0.0426644	0.43125	PAPPA-AS2
ENSG00000137834.15	119.286	-1.1866	0.585454	-2.02681	0.042682	0.43125	SMAD6
ENSG00000185669.6	15.2891	-2.0016	0.987519	-2.0269	0.0426726	0.43125	SNAI3
ENSG00000260244.1	40.9334	-1.53781	0.759316	-2.02526	0.0428411	0.43263	AC104083.1
ENSG00000110455.14	251.021	-1.30924	0.646792	-2.0242	0.0429494	0.432857	ACCS
ENSG00000183723.12	957.298	-0.97432	0.481315	-2.02429	0.0429405	0.432857	CMTM4
ENSG00000196872.12	161.003	-1.45784	0.720295	-2.02394	0.0429759	0.432857	KIAA1211L
ENSG00000157404.15	125.475	-1.81964	0.899039	-2.02398	0.0429719	0.432857	KIT
ENSG00000181631.7	84.779	-1.85139	0.914375	-2.02477	0.0428914	0.432857	P2RY13
ENSG00000161958.11	400.804	1.2103	0.598223	2.02315	0.0430574	0.433226	FGF11
ENSG00000108387.15	493.957	-1.35573	0.670056	-2.02331	0.0430414	0.433226	SEPTIN4
ENSG00000287080.1	260.341	1.79141	0.885903	2.02213	0.0431624	0.433981	HIST1H3C
ENSG00000235109.7	58.259	-1.298	0.64194	-2.02199	0.0431775	0.433981	ZSCAN31
ENSG00000110148.10	12.0333	-2.02136	1.00049	-2.02038	0.0433442	0.434372	CCKBR
ENSG00000156261.13	479.255	0.810979	0.401333	2.02071	0.0433093	0.434372	CCT8
ENSG00000120280.6	19.164	-1.76272	0.872226	-2.02095	0.0432851	0.434372	CXorf21
ENSG00000118407.15	57.184	-1.49289	0.738985	-2.02019	0.0433641	0.434372	FILIP1
ENSG00000163362.11	101.337	1.27277	0.630058	2.02009	0.0433741	0.434372	INAVA
ENSG00000204950.4	24.2318	-1.87328	0.92684	-2.02114	0.043265	0.434372	LRRC10B
ENSG00000100883.12	307.204	0.816028	0.403883	2.02045	0.0433363	0.434372	SRP54
ENSG00000123609.11	58.0221	-1.17998	0.584319	-2.01941	0.0434443	0.434849	NMI
ENSG00000153044.10	39.6542	1.24884	0.618588	2.01886	0.0435016	0.435196	CENPH
ENSG00000138400.13	54.0132	-1.34303	0.665376	-2.01846	0.0435437	0.435392	MDH1B
ENSG00000285108.1	14.4146	-2.60923	1.29308	-2.01784	0.0436084	0.435813	AC103718.1
ENSG00000157212.19	209.247	0.935098	0.463872	2.01585	0.0438156	0.437656	PAXIP1
ENSG00000277399.4	135.364	2.01582	1.00023	2.01535	0.0438679	0.437952	GPR179
ENSG00000168874.13	193.453	-1.29318	0.642023	-2.01423	0.043985	0.438667	ATOH8
ENSG00000163872.16	991.697	0.814938	0.404559	2.01439	0.043969	0.438667	YEATS2
ENSG00000280344.1	99.5679	-1.09883	0.545621	-2.01391	0.0440194	0.438783	AC009166.2
ENSG00000149657.20	565.668	0.87229	0.433193	2.01363	0.0440484	0.438845	LSM14B
ENSG00000279668.3	10.5323	-2.28328	1.13451	-2.01257	0.0441604	0.439455	AC024610.2
ENSG00000167604.14	126.062	-1.35604	0.673841	-2.0124	0.044178	0.439455	NFKBID
ENSG00000115268.9	1201.95	0.897521	0.445946	2.01262	0.0441545	0.439455	RPS15
ENSG00000047617.15	32.725	-1.40409	0.698038	-2.01148	0.0442746	0.439962	ANO2
ENSG00000176749.9	767.336	1.48875	0.740077	2.01161	0.0442613	0.439962	CDK5R1
ENSG00000078725.13	89.8353	-1.61572	0.803455	-2.01097	0.044329	0.440048	BRINP1
ENSG00000113389.16	27.1695	1.82419	0.907116	2.01097	0.0443283	0.440048	NPR3
ENSG00000273489.1	24.7623	-2.00423	0.997144	-2.00997	0.0444348	0.440315	AC008264.2
ENSG00000250461.1	35.9518	-1.38673	0.689965	-2.00985	0.0444472	0.440315	AC122718.1
ENSG00000149972.11	24.9961	-1.73731	0.864218	-2.01026	0.0444032	0.440315	CNTN5
ENSG00000150593.18	206.141	-1.22398	0.608849	-2.01032	0.0443968	0.440315	PDCD4
ENSG00000255639.3	42.7911	1.4389	0.716232	2.00898	0.0445387	0.440416	AC005833.1
ENSG00000213203.3	33.8478	-1.2987	0.646444	-2.00899	0.0445387	0.440416	GIMAP1
ENSG00000136240.10	1354.2	1.07883	0.536991	2.00902	0.0445349	0.440416	KDELR2
ENSG00000169247.12	129.21	-1.33384	0.663971	-2.00889	0.0445488	0.440416	SH3TC2
ENSG00000134508.12	81.628	-1.21551	0.605394	-2.00781	0.0446637	0.440498	CABLES1
ENSG00000125170.11	119.241	1.27751	0.636284	2.00777	0.0446682	0.440498	DOK4
ENSG00000184185.10	12.5494	-1.85432	0.923231	-2.00851	0.0445889	0.440498	KCNJ12
ENSG00000253368.4	112.1	1.05957	0.527742	2.00774	0.0446713	0.440498	TRNP1
ENSG00000164631.19	614.699	0.948225	0.47217	2.00823	0.0446192	0.440498	ZNF12
ENSG00000277215.2	19.393	-2.05278	1.02259	-2.00742	0.0447046	0.440601	SPANXA2-OT1
ENSG00000279819.1	18.8688	-1.79367	0.893693	-2.00703	0.0447468	0.440616	AL390318.1
ENSG00000165816.13	17.0873	-1.90952	0.951439	-2.00698	0.0447519	0.440616	VWA2
ENSG00000108602.18	10.1633	-1.85065	0.922252	-2.00667	0.0447848	0.440716	ALDH3A1
ENSG00000183171.5	26.872	-1.87339	0.934333	-2.00505	0.0449572	0.442071	BX322650.1
ENSG00000126882.13	167.098	-1.44408	0.720257	-2.00495	0.0449684	0.442071	FAM78A
ENSG00000079335.20	93.8879	-1.19333	0.595639	-2.00345	0.0451289	0.442971	CDC14A
ENSG00000164176.13	412.435	-1.73306	0.864974	-2.0036	0.0451128	0.442971	EDIL3
ENSG00000173457.11	415.059	1.0547	0.526394	2.00363	0.0451099	0.442971	PPP1R14B
ENSG00000203739.4	114.585	-1.18561	0.592127	-2.00228	0.0452544	0.443976	AL645568.1
ENSG00000151327.12	259.053	0.897247	0.44819	2.00194	0.0452917	0.444117	FAM177A1
ENSG00000225092.2	16.7889	-1.84681	0.922736	-2.00145	0.0453435	0.444399	AL355336.1
ENSG00000113569.16	532.104	0.779946	0.389745	2.00117	0.0453738	0.44447	NUP155
ENSG00000106538.10	199.785	1.12574	0.562706	2.00058	0.0454379	0.444871	RARRES2
ENSG00000181007.9	227.29	0.806992	0.403513	1.99992	0.0455092	0.445343	ZFP82
ENSG00000007923.16	327.817	0.843164	0.421839	1.99878	0.0456321	0.445641	DNAJC11
ENSG00000184731.6	100.092	-1.86759	0.934283	-1.99895	0.0456135	0.445641	FAM110C
ENSG00000204314.12	100.357	-0.923024	0.461686	-1.99924	0.0455819	0.445641	PRRT1
ENSG00000124571.18	708.38	0.985157	0.492822	1.99901	0.0456071	0.445641	XPO5
ENSG00000227210.2	20.6928	2.01774	1.01004	1.99769	0.0457504	0.446119	AC079145.1
ENSG00000030419.16	351.552	-1.09049	0.545843	-1.99782	0.0457366	0.446119	IKZF2
ENSG00000110811.20	182.401	0.935666	0.468328	1.99789	0.0457289	0.446119	P3H3
ENSG00000181481.14	135.127	-1.01703	0.509203	-1.99729	0.0457934	0.446312	RNF135
ENSG00000242593.7	22.0155	-2.26933	1.13683	-1.99619	0.0459133	0.446355	AC006148.1
ENSG00000076242.14	266.966	0.886595	0.444063	1.99655	0.045874	0.446355	MLH1
ENSG00000188338.15	389.75	-1.02903	0.515496	-1.99619	0.0459136	0.446355	SLC38A3
ENSG00000186340.15	1246.37	-1.07829	0.540102	-1.99645	0.0458845	0.446355	THBS2
ENSG00000204977.10	304.872	0.933125	0.467339	1.99668	0.0458604	0.446355	TRIM13
ENSG00000117724.13	510.292	1.07115	0.536895	1.99508	0.0460347	0.446407	CENPF
ENSG00000167670.16	145.93	0.975101	0.488698	1.9953	0.0460098	0.446407	CHAF1A
ENSG00000086065.14	258.068	0.933787	0.467906	1.99567	0.0459695	0.446407	CHMP5
ENSG00000169840.5	37.7026	2.46022	1.23307	1.99521	0.0460202	0.446407	GSX1
ENSG00000189343.7	154.209	1.09471	0.548473	1.99592	0.0459422	0.446407	RPS2P46
ENSG00000158258.16	835.124	-1.33481	0.669254	-1.99447	0.0461008	0.446599	CLSTN2
ENSG00000119946.11	43.4674	-1.94575	0.975524	-1.99457	0.0460894	0.446599	CNNM1
ENSG00000137285.10	4240.64	1.03305	0.518055	1.99409	0.0461423	0.446776	TUBB2B
ENSG00000236255.2	63.9705	1.43233	0.718501	1.9935	0.0462066	0.446949	AC009404.1
ENSG00000232884.8	10.5829	-2.03262	1.01961	-1.99352	0.0462042	0.446949	AF127936.2
ENSG00000196549.10	13.0162	-2.55221	1.28046	-1.99319	0.0462409	0.447057	MME
ENSG00000249661.1	28.0297	-1.66594	0.835955	-1.99285	0.0462775	0.447186	TNRC18P1
ENSG00000148680.16	14.3355	-2.47795	1.2439	-1.99209	0.0463613	0.447772	HTR7
ENSG00000214787.10	22.699	-1.8073	0.907864	-1.99071	0.0465125	0.448785	MS4A4E
[truncated: 58,612 more rows]

## Sheet: Table S2
Supplementary Table 2. Complete RNA-seq results: differential expression analysis between TSA / untreated cultures
In pale orange, TSA upregulated genes (in red, also enriched in H3achigh tumours); in green, TSA downregulated genes
gene_id	baseMean	log2FoldChange	lfcSE	stat	pvalue	padj	gene_name
ENSG00000163536.12	512.423	5.55305	0.363457	15.2784	1.07e-52	1.74e-48	SERPINI1
ENSG00000128564.7	343.186	4.69555	0.366306	12.8186	1.29e-37	1.05e-33	VGF
ENSG00000143162.9	671.397	3.5121	0.280635	12.5148	6.2e-36	3.37e-32	CREG1
ENSG00000125144.13	264.89	3.95653	0.323355	12.2359	2e-34	8.16e-31	MT1G
ENSG00000174469.23	257.037	5.53184	0.479843	11.5284	9.49e-31	3.1e-27	CNTNAP2
ENSG00000235092.6	1305.18	4.09101	0.358106	11.424	3.17e-30	8.63e-27	ID2-AS1
ENSG00000176840.12	216.22	4.8551	0.427774	11.3497	7.44e-30	1.74e-26	MIR7-3HG
ENSG00000188825.14	402.758	3.31777	0.2962	11.2011	4.03e-29	8.22e-26	LINC00910
ENSG00000179388.9	277.02	2.97175	0.267415	11.1129	1.09e-28	1.97e-25	EGR3
ENSG00000064300.9	355.504	2.65981	0.250678	10.6105	2.66e-26	4.35e-23	NGFR
ENSG00000116983.13	206.047	3.24987	0.307632	10.5641	4.37e-26	6.49e-23	HPCAL4
ENSG00000136960.12	154.887	4.82534	0.459535	10.5005	8.59e-26	1.17e-22	ENPP2
ENSG00000176533.13	470.873	3.04724	0.291833	10.4417	1.6e-25	2.01e-22	GNG7
ENSG00000152527.14	130.315	5.42018	0.52571	10.3102	6.34e-25	7.39e-22	PLEKHH2
ENSG00000007516.13	356.262	4.62527	0.449813	10.2826	8.44e-25	9.19e-22	BAIAP3
ENSG00000133863.8	247.901	2.99601	0.292513	10.2423	1.28e-24	1.31e-21	TEX15
ENSG00000278709.2	114.617	4.18778	0.419154	9.99103	1.67e-23	1.6e-20	NKILA
ENSG00000100867.14	211.977	4.40842	0.448994	9.81845	9.38e-23	8.51e-20	DHRS2
ENSG00000143028.9	102.302	5.16193	0.527541	9.78489	1.31e-22	1.12e-19	SYPL2
ENSG00000287064.1	329.008	3.59715	0.369282	9.74093	2.02e-22	1.65e-19	AL606500.1
ENSG00000162551.14	268.26	2.91338	0.299249	9.73563	2.12e-22	1.65e-19	ALPL
ENSG00000245532.9	8444.36	2.0185	0.209996	9.6121	7.11e-22	5.28e-19	NEAT1
ENSG00000120756.13	208.904	4.35462	0.456901	9.53077	1.56e-21	1.11e-18	PLS1
ENSG00000248485.2	105.746	5.17044	0.552994	9.34989	8.77e-21	5.97e-18	PCP4L1
ENSG00000223839.8	87.9683	4.148	0.445891	9.30272	1.37e-20	8.94e-18	FAM95B1
ENSG00000123416.15	16837.4	-2.06594	0.227681	-9.0738	1.15e-19	7.22e-17	TUBA1B
ENSG00000176244.7	655.523	2.21248	0.247145	8.95216	3.49e-19	2.11e-16	ACBD7
ENSG00000169213.7	330.032	2.29263	0.257253	8.91195	5.01e-19	2.92e-16	RAB3B
ENSG00000100297.16	512.392	-2.27363	0.256106	-8.87769	6.83e-19	3.84e-16	MCM5
ENSG00000160867.15	145.971	4.08561	0.461324	8.85628	8.27e-19	4.5e-16	FGFR4
ENSG00000197943.10	62.6295	6.63452	0.753937	8.79983	1.37e-18	7.22e-16	PLCG2
ENSG00000248323.7	338.47	4.21492	0.479726	8.78609	1.55e-18	7.9e-16	LUCAT1
ENSG00000155367.15	168.235	3.15527	0.360631	8.74931	2.15e-18	1.06e-15	PPM1J
ENSG00000156687.11	254.891	3.02303	0.346035	8.73617	2.41e-18	1.16e-15	UNC5D
ENSG00000274956.2	561.314	-2.53636	0.290737	-8.7239	2.69e-18	1.25e-15	NKAIN3-IT1
ENSG00000137801.11	669.427	2.72357	0.313321	8.69259	3.54e-18	1.61e-15	THBS1
ENSG00000140092.14	142.389	3.34234	0.384962	8.68225	3.88e-18	1.71e-15	FBLN5
ENSG00000148484.18	1628.67	1.73534	0.200334	8.66227	4.62e-18	1.99e-15	RSU1
ENSG00000120437.9	1072.02	-2.32171	0.270716	-8.57618	9.81e-18	4.11e-15	ACAT2
ENSG00000166206.15	107.572	3.3453	0.391295	8.54929	1.24e-17	5.06e-15	GABRB3
ENSG00000111885.7	86.1093	4.2876	0.504073	8.50591	1.8e-17	7.18e-15	MAN1A1
ENSG00000149328.14	162.968	3.52417	0.414991	8.49216	2.03e-17	7.89e-15	GLB1L2
ENSG00000203930.12	163.4	3.88332	0.460525	8.43237	3.39e-17	1.29e-14	LINC00632
ENSG00000143320.9	170.059	2.99577	0.358006	8.36792	5.86e-17	2.18e-14	CRABP2
ENSG00000157404.15	94.2208	3.62992	0.434293	8.35823	6.37e-17	2.31e-14	KIT
ENSG00000036530.9	145.854	3.52382	0.424307	8.3049	9.99e-17	3.55e-14	CYP46A1
ENSG00000154265.16	83.46	4.16085	0.502006	8.28844	1.15e-16	3.99e-14	ABCA5
ENSG00000147257.14	248.855	2.84762	0.344803	8.2587	1.47e-16	5.01e-14	GPC3
ENSG00000164106.8	1473.52	-2.07764	0.253831	-8.18512	2.72e-16	9.07e-14	SCRG1
ENSG00000081052.12	61.3197	6.16624	0.755277	8.16422	3.24e-16	1.06e-13	COL4A4
ENSG00000197565.15	65.3967	4.76414	0.584586	8.14959	3.65e-16	1.17e-13	COL4A6
ENSG00000286427.1	72.935	4.5588	0.563146	8.09523	5.72e-16	1.79e-13	AC009486.2
ENSG00000172986.13	132.215	2.85172	0.352456	8.09098	5.92e-16	1.82e-13	GXYLT2
ENSG00000113070.8	290.09	2.04516	0.255028	8.01934	1.06e-15	3.16e-13	HBEGF
ENSG00000216490.4	195.549	2.74406	0.342184	8.01925	1.06e-15	3.16e-13	IFI30
ENSG00000145147.20	84.5623	3.51859	0.440695	7.98419	1.41e-15	4.12e-13	SLIT2
ENSG00000148180.19	574.661	2.48133	0.312014	7.95265	1.83e-15	5.23e-13	GSN
ENSG00000106565.18	129.778	2.6092	0.328428	7.9445	1.95e-15	5.49e-13	TMEM176B
ENSG00000174460.4	311.019	2.99403	0.377419	7.93291	2.14e-15	5.92e-13	ZCCHC12
ENSG00000137261.14	128.064	2.78177	0.351645	7.91073	2.56e-15	6.96e-13	KIAA0319
ENSG00000149485.19	2537.55	-1.52933	0.193375	-7.90865	2.6e-15	6.97e-13	FADS1
ENSG00000166508.17	1780.99	-1.57006	0.199335	-7.87651	3.37e-15	8.87e-13	MCM7
ENSG00000114279.13	259.046	2.45597	0.315875	7.77513	7.54e-15	1.92e-12	FGF12
ENSG00000250722.6	337.088	2.38161	0.306275	7.77605	7.48e-15	1.92e-12	SELENOP
ENSG00000111678.11	342.851	-1.98377	0.255635	-7.76016	8.48e-15	2.13e-12	C12orf57
ENSG00000271303.1	2502.86	2.53084	0.32859	7.70212	1.34e-14	3.31e-12	SRXN1
ENSG00000153162.9	59.306	4.42151	0.574942	7.69036	1.47e-14	3.58e-12	BMP6
ENSG00000118298.12	482.511	-1.82839	0.238087	-7.6795	1.6e-14	3.84e-12	CA14
ENSG00000134864.10	51.1006	3.86597	0.505313	7.65065	2e-14	4.73e-12	GGACT
ENSG00000171992.13	310.423	2.55256	0.33579	7.60165	2.92e-14	6.82e-12	SYNPO
ENSG00000151834.15	50.6178	4.88311	0.643464	7.58879	3.23e-14	7.43e-12	GABRA2
ENSG00000052802.13	1410.29	-1.95151	0.257361	-7.58277	3.38e-14	7.67e-12	MSMO1
ENSG00000122877.16	188.876	2.58965	0.342037	7.57128	3.7e-14	8.27e-12	EGR2
ENSG00000173227.14	81.3836	3.89837	0.516036	7.55447	4.21e-14	9.28e-12	SYT12
ENSG00000171864.5	71.4364	9.49302	1.25697	7.55229	4.28e-14	9.31e-12	PRND
ENSG00000178053.19	344.075	2.8841	0.385664	7.47826	7.53e-14	1.62e-11	MLF1
ENSG00000111077.17	283.594	-2.37051	0.317672	-7.46213	8.51e-14	1.81e-11	TNS2
ENSG00000111328.7	3319.1	-1.91003	0.256648	-7.44221	9.9e-14	2.07e-11	CDK2AP1
ENSG00000169894.18	53.8143	6.28259	0.849805	7.39298	1.44e-13	2.95e-11	MUC3A
ENSG00000165929.13	167.012	2.19844	0.297397	7.39229	1.44e-13	2.95e-11	TC2N
ENSG00000165959.12	112.316	2.64451	0.357985	7.3872	1.5e-13	2.97e-11	CLMN
ENSG00000120738.8	1406.36	1.57606	0.21342	7.38477	1.53e-13	2.97e-11	EGR1
ENSG00000087253.13	192.811	3.0412	0.411698	7.38697	1.5e-13	2.97e-11	LPCAT2
ENSG00000198959.12	75.9957	4.43045	0.599959	7.38458	1.53e-13	2.97e-11	TGM2
ENSG00000170962.13	207.93	2.16559	0.293954	7.3671	1.74e-13	3.35e-11	PDGFD
ENSG00000138759.19	242.005	2.92275	0.397185	7.35868	1.86e-13	3.53e-11	FRAS1
ENSG00000226200.7	82.0851	2.94393	0.401153	7.33866	2.16e-13	4.05e-11	SGMS1-AS1
ENSG00000204381.11	86.5274	4.31264	0.589933	7.31039	2.66e-13	4.94e-11	LAYN
ENSG00000196230.13	13090	-1.76342	0.241388	-7.30536	2.77e-13	5.07e-11	TUBB
ENSG00000135919.13	3393.39	1.52024	0.208319	7.29763	2.93e-13	5.31e-11	SERPINE2
ENSG00000106366.8	1417.17	3.08275	0.422836	7.29066	3.08e-13	5.54e-11	SERPINE1
ENSG00000162073.14	805.583	-1.49319	0.206833	-7.21929	5.23e-13	9.28e-11	PAQR4
ENSG00000267365.1	62.8997	4.89061	0.678034	7.21293	5.48e-13	9.62e-11	KCNJ2-AS1
ENSG00000118898.16	106.477	3.96719	0.551041	7.19945	6.05e-13	1.05e-10	PPL
ENSG00000123243.15	65.5265	9.36658	1.30167	7.19584	6.21e-13	1.07e-10	ITIH5
ENSG00000163331.11	57.7305	3.67517	0.514711	7.14026	9.32e-13	1.58e-10	DAPL1
ENSG00000142089.16	646.899	-1.69617	0.23897	-7.09783	1.27e-12	2.13e-10	IFITM3
ENSG00000184005.11	44.8931	5.92379	0.839664	7.05495	1.73e-12	2.88e-10	ST6GALNAC3
ENSG00000101098.12	274.124	2.07622	0.295415	7.02813	2.09e-12	3.45e-10	RIMS4
ENSG00000070961.15	914.656	1.83446	0.261346	7.01928	2.23e-12	3.64e-10	ATP2B1
ENSG00000126583.11	77.1919	3.61322	0.516236	6.99916	2.57e-12	4.16e-10	PRKCG
ENSG00000100311.17	48.002	5.81331	0.83374	6.97258	3.11e-12	4.98e-10	PDGFB
ENSG00000120915.14	72.9645	2.93656	0.422137	6.95642	3.49e-12	5.53e-10	EPHX2
ENSG00000162817.7	59.9652	3.65029	0.524956	6.95351	3.56e-12	5.59e-10	C1orf115
ENSG00000005020.13	445.39	1.72594	0.248769	6.93792	3.98e-12	6.13e-10	SKAP2
ENSG00000153291.16	57.6977	3.72122	0.536257	6.93923	3.94e-12	6.13e-10	SLC25A27
ENSG00000233058.2	119.687	2.49732	0.360198	6.93319	4.11e-12	6.28e-10	LINC00884
ENSG00000187554.14	53.6462	3.26032	0.470333	6.93193	4.15e-12	6.28e-10	TLR5
ENSG00000054356.14	382.769	2.10484	0.303831	6.92768	4.28e-12	6.41e-10	PTPRN
ENSG00000003989.17	55.094	5.20556	0.75245	6.91815	4.58e-12	6.79e-10	SLC7A2
ENSG00000151229.13	168.435	2.72066	0.393631	6.91171	4.79e-12	7.04e-10	SLC2A13
ENSG00000108387.15	215.251	2.02323	0.294496	6.87015	6.41e-12	9.35e-10	SEPTIN4
ENSG00000168952.15	45.0785	4.42775	0.647889	6.83412	8.25e-12	1.19e-09	STXBP6
ENSG00000130635.15	339.297	1.84049	0.270354	6.80771	9.92e-12	1.42e-09	COL5A1
ENSG00000050344.9	173.427	2.85569	0.419623	6.80537	1.01e-11	1.43e-09	NFE2L3
ENSG00000095303.17	80.0491	3.14417	0.465123	6.75987	1.38e-11	1.94e-09	PTGS1
ENSG00000160752.14	1941.01	-1.40946	0.208767	-6.75134	1.46e-11	2.03e-09	FDPS
ENSG00000073350.13	53.0762	5.7529	0.851974	6.75243	1.45e-11	2.03e-09	LLGL2
ENSG00000244342.5	46.9448	4.08729	0.607699	6.72584	1.75e-11	2.4e-09	LINC00698
ENSG00000167325.15	1665.2	-1.33295	0.198225	-6.72445	1.76e-11	2.4e-09	RRM1
ENSG00000233143.2	110.333	3.20849	0.478244	6.7089	1.96e-11	2.65e-09	DIRC3-AS1
ENSG00000169684.13	100.581	2.77853	0.414395	6.70504	2.01e-11	2.7e-09	CHRNA5
ENSG00000134873.10	38.5245	8.60523	1.28467	6.6984	2.11e-11	2.8e-09	CLDN10
ENSG00000173083.15	93.8457	3.13046	0.467859	6.69105	2.22e-11	2.92e-09	HPSE
ENSG00000203685.10	207.649	1.94698	0.291168	6.68678	2.28e-11	2.98e-09	STUM
ENSG00000203727.4	131.333	2.08586	0.312056	6.68426	2.32e-11	3.01e-09	SAMD5
ENSG00000132205.11	36.4293	4.5327	0.678372	6.68174	2.36e-11	3.04e-09	EMILIN2
ENSG00000096060.14	197.548	2.31558	0.347587	6.66186	2.7e-11	3.45e-09	FKBP5
ENSG00000274588.2	38.697	8.60892	1.29328	6.65665	2.8e-11	3.55e-09	DGKK
ENSG00000196951.11	33.0755	4.75637	0.715034	6.65194	2.89e-11	3.63e-09	SCOC-AS1
ENSG00000242574.9	87.7956	3.47925	0.524178	6.63753	3.19e-11	3.98e-09	HLA-DMB
ENSG00000114646.10	1146.1	-1.46369	0.221097	-6.62012	3.59e-11	4.44e-09	CSPG5
ENSG00000152056.17	103.602	2.45369	0.372317	6.59031	4.39e-11	5.35e-09	AP1S3
ENSG00000083123.15	311.905	1.64318	0.249316	6.59074	4.38e-11	5.35e-09	BCKDHB
ENSG00000197948.11	131.403	2.26441	0.344425	6.57445	4.88e-11	5.91e-09	FCHSD1
ENSG00000112297.15	33.7302	5.33737	0.81224	6.57117	4.99e-11	5.99e-09	CRYBG1
ENSG00000117114.19	33.9705	8.4178	1.28383	6.5568	5.5e-11	6.54e-09	ADGRL2
ENSG00000197594.13	39.1364	5.31543	0.810779	6.55596	5.53e-11	6.54e-09	ENPP1
ENSG00000236682.2	185.539	2.01227	0.307014	6.55432	5.59e-11	6.57e-09	MAP3K2-DT
ENSG00000116299.17	145.807	2.7538	0.421291	6.53657	6.29e-11	7.34e-09	KIAA1324
ENSG00000116191.17	265.76	2.30734	0.354225	6.51376	7.33e-11	8.49e-09	RALGPS2
ENSG00000170323.9	34.8023	8.45147	1.29976	6.50231	7.91e-11	9.1e-09	FABP4
ENSG00000101412.13	637.584	-1.45635	0.224129	-6.49782	8.15e-11	9.27e-09	E2F1
ENSG00000011347.9	174.174	2.00736	0.308987	6.49658	8.22e-11	9.27e-09	SYT7
ENSG00000258947.7	3091.13	-1.55086	0.23873	-6.4963	8.23e-11	9.27e-09	TUBB3
ENSG00000183684.8	345.461	-1.50962	0.232935	-6.48089	9.12e-11	1.02e-08	ALYREF
ENSG00000146670.10	491.266	-1.54917	0.239216	-6.47602	9.42e-11	1.04e-08	CDCA5
ENSG00000130164.13	465.634	-1.64041	0.253258	-6.47721	9.34e-11	1.04e-08	LDLR
ENSG00000079819.19	1304.4	1.36717	0.212061	6.44703	1.14e-10	1.25e-08	EPB41L2
ENSG00000101000.6	35.7946	4.13032	0.64179	6.43563	1.23e-10	1.34e-08	PROCR
ENSG00000182871.16	173.447	2.27247	0.353522	6.4281	1.29e-10	1.4e-08	COL18A1
ENSG00000240875.6	69.3075	3.55638	0.554226	6.41684	1.39e-10	1.49e-08	LINC00886
ENSG00000174099.11	35.1543	4.81576	0.75119	6.41084	1.45e-10	1.53e-08	MSRB3
ENSG00000008056.14	374.448	2.36473	0.368851	6.41107	1.45e-10	1.53e-08	SYN1
ENSG00000185352.8	38.3115	4.34509	0.677919	6.40944	1.46e-10	1.54e-08	HS6ST3
ENSG00000230359.5	122.331	2.13346	0.333187	6.40319	1.52e-10	1.59e-08	TPI1P2
ENSG00000198624.13	37.0812	5.55021	0.870434	6.37637	1.81e-10	1.89e-08	CCDC69
ENSG00000196083.10	501.63	1.87301	0.294	6.37079	1.88e-10	1.94e-08	IL1RAP
ENSG00000145819.18	654.981	2.21947	0.349143	6.35691	2.06e-10	2.11e-08	ARHGAP26
ENSG00000175785.13	91.5958	-2.27871	0.35859	-6.35464	2.09e-10	2.13e-08	PRIMA1
ENSG00000246982.7	56.5001	3.24031	0.512739	6.3196	2.62e-10	2.66e-08	Z84485.1
ENSG00000182459.5	38.7927	6.18367	0.979702	6.31179	2.76e-10	2.78e-08	TEX19
ENSG00000134824.14	6015.58	-2.01278	0.320183	-6.28634	3.25e-10	3.26e-08	FADS2
ENSG00000168938.6	185.412	1.94374	0.309304	6.28423	3.29e-10	3.28e-08	PPIC
ENSG00000112394.17	28.5369	5.05531	0.804792	6.28151	3.35e-10	3.32e-08	SLC16A10
ENSG00000211445.12	231.56	2.50994	0.400015	6.2746	3.51e-10	3.45e-08	GPX3
ENSG00000223802.7	743.914	-1.31084	0.209343	-6.26166	3.81e-10	3.72e-08	CERS1
ENSG00000105825.14	31.984	8.33515	1.33126	6.26111	3.82e-10	3.72e-08	TFPI2
ENSG00000242265.5	14722.3	1.39545	0.22311	6.25455	3.99e-10	3.85e-08	PEG10
ENSG00000221829.9	319.237	-2.04736	0.32798	-6.24234	4.31e-10	4.14e-08	FANCG
ENSG00000203668.2	805.008	1.32726	0.213082	6.22888	4.7e-10	4.47e-08	CHML
ENSG00000132026.13	43.6181	4.6325	0.74377	6.22841	4.71e-10	4.47e-08	RTBDN
ENSG00000118946.12	863.241	1.56684	0.251614	6.22717	4.75e-10	4.48e-08	PCDH17
ENSG00000101057.16	458.718	-1.79988	0.289141	-6.22493	4.82e-10	4.52e-08	MYBL2
ENSG00000149554.13	487.508	-1.51391	0.24367	-6.21297	5.2e-10	4.85e-08	CHEK1
ENSG00000146674.15	474.513	1.78646	0.28787	6.20579	5.44e-10	5.05e-08	IGFBP3
ENSG00000143882.12	49.1447	4.14068	0.668128	6.19744	5.74e-10	5.29e-08	ATP6V1C2
ENSG00000148357.16	26.8703	5.7272	0.924583	6.19436	5.85e-10	5.37e-08	HMCN2
ENSG00000128641.19	30.9931	5.37153	0.867464	6.19222	5.93e-10	5.41e-08	MYO1B
ENSG00000164045.12	214.858	-1.72412	0.278484	-6.19109	5.98e-10	5.42e-08	CDC25A
ENSG00000171724.3	153.116	2.20704	0.356546	6.19004	6.01e-10	5.43e-08	VAT1L
ENSG00000187416.12	294.234	-2.15778	0.348899	-6.18454	6.23e-10	5.59e-08	LHFPL3
ENSG00000189410.12	65.7224	2.77413	0.448679	6.18289	6.29e-10	5.62e-08	SH2D5
ENSG00000186472.20	75.344	3.58891	0.581226	6.17473	6.63e-10	5.88e-08	PCLO
ENSG00000154654.15	115.386	2.92076	0.47332	6.1708	6.79e-10	5.99e-08	NCAM2
ENSG00000224616.3	339.891	1.98278	0.321344	6.17026	6.82e-10	5.99e-08	RTCA-AS1
ENSG00000051180.17	128.132	-2.00306	0.324914	-6.1649	7.05e-10	6.16e-08	RAD51
ENSG00000138650.9	1033.42	1.37036	0.222366	6.16265	7.15e-10	6.21e-08	PCDH10
ENSG00000136068.14	1081.08	1.83993	0.298997	6.15365	7.57e-10	6.54e-08	FLNB
ENSG00000140465.14	46.9357	5.43057	0.883264	6.1483	7.83e-10	6.73e-08	CYP1A1
ENSG00000276564.1	128.659	2.55453	0.416306	6.13619	8.45e-10	7.23e-08	AC130650.2
ENSG00000160783.19	191.852	-2.29545	0.374593	-6.12787	8.91e-10	7.58e-08	PMF1
ENSG00000260604.2	218.165	3.39217	0.555598	6.10544	1.03e-09	8.64e-08	AL590004.3
ENSG00000095713.14	73.5982	2.84354	0.465808	6.10453	1.03e-09	8.64e-08	CRTAC1
ENSG00000108813.11	28.1797	8.13508	1.33266	6.10437	1.03e-09	8.64e-08	DLX4
ENSG00000188517.16	25.8573	8.02193	1.31503	6.1002	1.06e-09	8.83e-08	COL25A1
ENSG00000167549.18	61.1487	2.65789	0.437344	6.07735	1.22e-09	1.01e-07	CORO6
ENSG00000136943.11	116.085	3.10417	0.510752	6.07765	1.22e-09	1.01e-07	CTSV
ENSG00000006047.13	118.625	2.67312	0.441	6.0615	1.35e-09	1.11e-07	YBX2
ENSG00000108797.12	487.375	-1.49241	0.24634	-6.05834	1.38e-09	1.12e-07	CNTNAP1
ENSG00000213398.8	506.564	-1.60693	0.265249	-6.0582	1.38e-09	1.12e-07	LCAT
ENSG00000124374.9	109.595	3.49604	0.577217	6.05672	1.39e-09	1.12e-07	PAIP2B
ENSG00000168496.4	638.792	-1.33507	0.220749	-6.0479	1.47e-09	1.18e-07	FEN1
ENSG00000044524.11	215.826	1.61528	0.26761	6.03595	1.58e-09	1.26e-07	EPHA3
ENSG00000141750.7	185.952	2.90985	0.482437	6.03156	1.62e-09	1.29e-07	STAC2
ENSG00000187686.4	49.6202	3.06277	0.509203	6.01484	1.8e-09	1.43e-07	KRT18P59
ENSG00000026559.14	48.7453	3.25801	0.542979	6.00025	1.97e-09	1.55e-07	KCNG1
ENSG00000079950.14	766.898	1.52093	0.253485	6.00007	1.97e-09	1.55e-07	STX7
ENSG00000115255.11	89.7414	3.66411	0.611963	5.98746	2.13e-09	1.67e-07	REEP6
ENSG00000162706.13	785.396	1.27803	0.213541	5.98491	2.17e-09	1.68e-07	CADM3
ENSG00000285569.2	25.4761	8.00011	1.33732	5.9822	2.2e-09	1.7e-07	AC099344.3
ENSG00000268129.1	58.6198	2.53855	0.424825	5.97554	2.29e-09	1.75e-07	AC026304.1
ENSG00000183814.15	180.373	-1.72173	0.288147	-5.97518	2.3e-09	1.75e-07	LIN9
ENSG00000115896.16	136.699	2.07937	0.3479	5.97692	2.27e-09	1.75e-07	PLCL1
ENSG00000175352.11	213.062	2.29856	0.385047	5.96957	2.38e-09	1.81e-07	NRIP3
ENSG00000144406.18	117.926	2.18858	0.366786	5.96693	2.42e-09	1.83e-07	UNC80
ENSG00000167646.13	51.7761	4.62465	0.776165	5.95833	2.55e-09	1.92e-07	DNAAF3
ENSG00000174238.15	1879.18	1.53188	0.257427	5.95075	2.67e-09	2e-07	PITPNA
ENSG00000134215.16	331.712	1.60109	0.269303	5.94531	2.76e-09	2.06e-07	VAV3
ENSG00000245552.7	92.8081	2.66082	0.44779	5.94212	2.81e-09	2.08e-07	AP000787.1
ENSG00000145198.14	110.694	2.6729	0.449766	5.94288	2.8e-09	2.08e-07	VWA5B2
ENSG00000198431.16	3336.6	1.38488	0.233254	5.93722	2.9e-09	2.13e-07	TXNRD1
ENSG00000175161.13	88.4316	2.8638	0.482577	5.93439	2.95e-09	2.16e-07	CADM2
ENSG00000138769.11	30.3623	4.13179	0.696326	5.9337	2.96e-09	2.16e-07	CDKL2
ENSG00000169031.19	34.6052	6.38899	1.07706	5.93188	2.99e-09	2.17e-07	COL4A3
ENSG00000165272.16	44.3416	3.38024	0.571046	5.91939	3.23e-09	2.33e-07	AQP3
ENSG00000133138.20	36.5977	4.1529	0.701651	5.91875	3.24e-09	2.33e-07	TBC1D8B
ENSG00000117411.16	419.253	-1.37443	0.232694	-5.90659	3.49e-09	2.5e-07	B4GALT2
ENSG00000174607.11	35.63	5.04587	0.854703	5.90365	3.56e-09	2.54e-07	UGT8
ENSG00000184515.11	45.8593	3.18497	0.539778	5.90052	3.62e-09	2.55e-07	BEX5
ENSG00000114859.16	707.168	-1.25527	0.212746	-5.90033	3.63e-09	2.55e-07	CLCN2
ENSG00000164574.16	1637.64	1.81562	0.307642	5.90172	3.6e-09	2.55e-07	GALNT10
ENSG00000172318.5	282.11	1.49925	0.254454	5.89201	3.82e-09	2.67e-07	B3GALT1
ENSG00000107816.17	204.718	-1.862	0.316452	-5.88398	4.01e-09	2.79e-07	LZTS2
ENSG00000130876.11	22.8604	7.85118	1.3347	5.88237	4.04e-09	2.81e-07	SLC7A10
ENSG00000124225.16	714.079	1.33811	0.227536	5.88088	4.08e-09	2.82e-07	PMEPA1
ENSG00000168394.11	1048.45	-1.2379	0.210548	-5.87943	4.12e-09	2.84e-07	TAP1
ENSG00000135447.17	90.23	3.06831	0.522112	5.87673	4.18e-09	2.87e-07	PPP1R1A
ENSG00000170791.18	349.337	2.26927	0.386968	5.86422	4.51e-09	3.08e-07	CHCHD7
ENSG00000184216.14	671.065	-1.47272	0.251616	-5.85305	4.83e-09	3.28e-07	IRAK1
ENSG00000147082.17	30.4659	4.00818	0.685325	5.84858	4.96e-09	3.35e-07	CCNB3
ENSG00000185250.15	51.2779	3.04121	0.519936	5.84919	4.94e-09	3.35e-07	PPIL6
ENSG00000062716.13	1533.85	1.35098	0.231076	5.84649	5.02e-09	3.37e-07	VMP1
ENSG00000168843.14	21.5866	7.76458	1.33098	5.83372	5.42e-09	3.63e-07	FSTL5
ENSG00000205358.3	29.8492	4.71396	0.810148	5.81864	5.93e-09	3.95e-07	MT1H
ENSG00000062282.15	56.838	3.01245	0.518563	5.80923	6.28e-09	4.17e-07	DGAT2
ENSG00000128849.10	103.315	2.0594	0.355709	5.78955	7.06e-09	4.67e-07	CGNL1
ENSG00000248174.6	104.765	2.50954	0.434579	5.77464	7.71e-09	5.08e-07	LINC02268
ENSG00000117152.13	31.7144	5.1181	0.887312	5.76809	8.02e-09	5.26e-07	RGS4
ENSG00000111981.5	190.218	2.53903	0.440602	5.76264	8.28e-09	5.41e-07	ULBP1
ENSG00000276043.5	503.184	-1.31084	0.227826	-5.75369	8.73e-09	5.68e-07	UHRF1
ENSG00000227502.3	43.0732	3.27351	0.569494	5.74809	9.03e-09	5.85e-07	LINC01268
ENSG00000166123.14	1592.82	-1.31986	0.229921	-5.74048	9.44e-09	6.09e-07	GPT2
ENSG00000223675.1	80.2735	4.39373	0.766125	5.735	9.75e-09	6.27e-07	AC093117.1
ENSG00000135838.13	135.884	2.15528	0.376166	5.72959	1.01e-08	6.42e-07	NPL
ENSG00000165244.7	224.978	-1.56326	0.272807	-5.73029	1e-08	6.42e-07	ZNF367
ENSG00000166707.11	142.107	-1.81434	0.317136	-5.72103	1.06e-08	6.73e-07	ZCCHC18
ENSG00000103740.10	207.266	-1.76863	0.309209	-5.71987	1.07e-08	6.75e-07	ACSBG1
ENSG00000068078.18	304.615	-1.51667	0.265259	-5.71772	1.08e-08	6.81e-07	FGFR3
ENSG00000115271.11	131.51	2.62621	0.460177	5.70696	1.15e-08	7.22e-07	GCA
ENSG00000235750.10	230.387	2.32554	0.407712	5.70387	1.17e-08	7.33e-07	KIAA0040
ENSG00000197444.10	65.539	2.91004	0.510253	5.70314	1.18e-08	7.33e-07	OGDHL
ENSG00000135097.7	292.505	-1.67849	0.294947	-5.69082	1.26e-08	7.85e-07	MSI1
ENSG00000117266.15	495.083	1.27221	0.223693	5.68731	1.29e-08	7.98e-07	CDK18
ENSG00000164099.3	74.641	3.14958	0.554079	5.68435	1.31e-08	8.08e-07	PRSS12
ENSG00000112081.17	2327	-1.25358	0.220548	-5.68393	1.32e-08	8.08e-07	SRSF3
ENSG00000285859.1	44.498	4.03483	0.710392	5.67972	1.35e-08	8.25e-07	AL512598.2
ENSG00000139428.12	270.603	-1.67992	0.295865	-5.67801	1.36e-08	8.3e-07	MMAB
ENSG00000160161.9	90.0756	2.60968	0.459719	5.67669	1.37e-08	8.34e-07	CILP2
ENSG00000279965.1	75.1334	3.91828	0.691072	5.66985	1.43e-08	8.58e-07	AL390755.2
ENSG00000081479.15	95.3928	2.72728	0.480937	5.67076	1.42e-08	8.58e-07	LRP2
ENSG00000182247.10	117.144	2.38132	0.41996	5.67034	1.43e-08	8.58e-07	UBE2E2
ENSG00000286342.1	29.5162	5.90088	1.04106	5.66816	1.44e-08	8.63e-07	AC073210.3
ENSG00000278266.1	95.8894	2.25557	0.398615	5.65852	1.53e-08	9.1e-07	AC079949.2
ENSG00000128510.12	80.1571	2.5507	0.451008	5.65554	1.55e-08	9.22e-07	CPA4
ENSG00000056998.20	108.312	1.9372	0.342604	5.65434	1.56e-08	9.22e-07	GYG2
ENSG00000114698.15	38.6051	3.73465	0.66042	5.65497	1.56e-08	9.22e-07	PLSCR4
ENSG00000006016.11	54.9	3.7194	0.658464	5.6486	1.62e-08	9.47e-07	CRLF1
ENSG00000221955.10	87.5069	2.25165	0.398593	5.649	1.61e-08	9.47e-07	SLC12A8
ENSG00000137962.13	99.7508	2.51228	0.444901	5.64684	1.63e-08	9.53e-07	ARHGAP29
ENSG00000173786.17	1593.01	-1.17803	0.209061	-5.63487	1.75e-08	1.02e-06	CNP
ENSG00000162621.6	68.4499	4.89155	0.870149	5.6215	1.89e-08	1.1e-06	LRRC53
ENSG00000162409.11	81.5649	2.10413	0.374828	5.61359	1.98e-08	1.14e-06	PRKAA2
ENSG00000237943.7	35.1039	3.7575	0.66978	5.61006	2.02e-08	1.16e-06	PRKCQ-AS1
ENSG00000213551.6	307.553	-1.40902	0.25122	-5.60871	2.04e-08	1.17e-06	DNAJC9
ENSG00000144893.12	218.889	1.67302	0.298607	5.60275	2.11e-08	1.2e-06	MED12L
ENSG00000085552.17	126.224	3.24357	0.57924	5.5997	2.15e-08	1.22e-06	IGSF9
ENSG00000093010.13	445.777	-1.24334	0.222347	-5.59188	2.25e-08	1.27e-06	COMT
ENSG00000185989.11	273.991	-1.40445	0.251219	-5.59053	2.26e-08	1.28e-06	RASA3
ENSG00000179051.14	1236.41	-1.62647	0.29098	-5.58962	2.28e-08	1.28e-06	RCC2
ENSG00000089847.12	97.591	2.08543	0.374064	5.57506	2.47e-08	1.38e-06	ANKRD24
ENSG00000104044.16	27.1208	4.96409	0.890176	5.57653	2.45e-08	1.38e-06	OCA2
ENSG00000129595.13	59.8416	3.80325	0.68258	5.57186	2.52e-08	1.4e-06	EPB41L4A
ENSG00000213889.10	39.9063	3.88487	0.697428	5.57028	2.54e-08	1.41e-06	PPM1N
ENSG00000187957.8	1854.31	1.35179	0.242766	5.56828	2.57e-08	1.42e-06	DNER
ENSG00000272888.7	844.284	-1.53858	0.276346	-5.56758	2.58e-08	1.42e-06	LINC01578
ENSG00000148175.13	273.348	1.77767	0.319188	5.56934	2.56e-08	1.42e-06	STOM
ENSG00000182179.13	200.832	-1.72089	0.309373	-5.5625	2.66e-08	1.46e-06	UBA7
ENSG00000163513.18	50.0242	2.89954	0.523383	5.54	3.02e-08	1.65e-06	TGFBR2
ENSG00000272701.3	73.5762	2.79931	0.506202	5.53002	3.2e-08	1.74e-06	MESTIT1
ENSG00000089060.11	136.583	2.38955	0.432904	5.51982	3.39e-08	1.84e-06	SLC8B1
ENSG00000203666.12	94.208	-2.18382	0.395764	-5.51799	3.43e-08	1.85e-06	EFCAB2
ENSG00000180263.14	255.303	1.44424	0.262165	5.50891	3.61e-08	1.94e-06	FGD6
ENSG00000182054.9	1047.3	-1.16513	0.211503	-5.5088	3.61e-08	1.94e-06	IDH2
ENSG00000073331.18	35.5336	2.98567	0.543145	5.49701	3.86e-08	2.06e-06	ALPK1
ENSG00000121236.21	38.4333	4.09677	0.745311	5.49673	3.87e-08	2.06e-06	TRIM6
ENSG00000260691.6	24.76	5.76353	1.0496	5.49119	3.99e-08	2.12e-06	ANKRD20A1
ENSG00000102471.14	272.989	1.82174	0.331746	5.49138	3.99e-08	2.12e-06	NDFIP2
ENSG00000136944.17	20.8652	7.7206	1.40632	5.48992	4.02e-08	2.13e-06	LMX1B
ENSG00000236529.2	27.4509	7.14293	1.30196	5.48627	4.11e-08	2.16e-06	AC093582.1
ENSG00000148400.12	1370.83	-1.26736	0.23101	-5.4862	4.11e-08	2.16e-06	NOTCH1
ENSG00000103005.11	920.411	1.65763	0.302325	5.48294	4.18e-08	2.19e-06	USB1
ENSG00000127124.16	352.257	1.92075	0.350715	5.47668	4.33e-08	2.26e-06	HIVEP3
ENSG00000143321.19	2709.73	-1.38094	0.252237	-5.47478	4.38e-08	2.28e-06	HDGF
ENSG00000165501.17	185.133	-1.61939	0.296033	-5.47032	4.49e-08	2.33e-06	LRR1
ENSG00000132294.15	593.214	1.31181	0.240063	5.46445	4.64e-08	2.4e-06	EFR3A
ENSG00000129195.16	569.946	-1.21651	0.222753	-5.46127	4.73e-08	2.44e-06	PIMREG
ENSG00000176658.17	92.1175	2.87528	0.526636	5.45971	4.77e-08	2.45e-06	MYO1D
ENSG00000243978.8	30.9934	3.50629	0.642679	5.45574	4.88e-08	2.5e-06	RTL9
ENSG00000184349.13	20.1836	5.30675	0.973401	5.45176	4.99e-08	2.54e-06	EFNA5
ENSG00000110002.16	391.805	1.6333	0.299605	5.45154	4.99e-08	2.54e-06	VWA5A
ENSG00000100100.13	77.3334	-2.20158	0.404044	-5.44885	5.07e-08	2.57e-06	PIK3IP1
ENSG00000176046.8	70.2702	-2.76618	0.508186	-5.44324	5.23e-08	2.65e-06	NUPR1
ENSG00000154099.18	40.98	7.49386	1.37728	5.44105	5.3e-08	2.66e-06	DNAAF1
ENSG00000204950.4	30.0808	3.37451	0.620159	5.44137	5.29e-08	2.66e-06	LRRC10B
ENSG00000198088.10	22.6056	5.14064	0.944848	5.44071	5.31e-08	2.66e-06	NUP62CL
ENSG00000138646.9	71.9851	3.1795	0.584794	5.43696	5.42e-08	2.71e-06	HERC5
ENSG00000163624.6	94.5748	2.27802	0.419223	5.4339	5.51e-08	2.75e-06	CDS1
ENSG00000111145.8	208.398	1.83054	0.337221	5.4283	5.69e-08	2.82e-06	ELK3
ENSG00000175643.10	169.277	-1.88943	0.348418	-5.42288	5.86e-08	2.9e-06	RMI2
ENSG00000100234.11	1608.26	1.59248	0.294095	5.41487	6.13e-08	3.03e-06	TIMP3
ENSG00000178038.17	67.62	2.70307	0.499532	5.4112	6.26e-08	3.08e-06	ALS2CL
ENSG00000129484.13	443.672	-1.34943	0.250066	-5.39631	6.8e-08	3.33e-06	PARP2
ENSG00000184226.15	529.532	1.26252	0.233943	5.3967	6.79e-08	3.33e-06	PCDH9
ENSG00000167131.17	18.7273	7.58369	1.4064	5.39225	6.96e-08	3.37e-06	CCDC103
ENSG00000161202.20	2012.57	-1.04653	0.194064	-5.3927	6.94e-08	3.37e-06	DVL3
ENSG00000196937.11	1899.32	1.25502	0.232753	5.39205	6.97e-08	3.37e-06	FAM3C
ENSG00000112972.15	3732	-1.3282	0.246319	-5.39219	6.96e-08	3.37e-06	HMGCS1
ENSG00000140365.16	346.153	-1.26876	0.235455	-5.38852	7.1e-08	3.4e-06	COMMD4
ENSG00000125148.7	1042.74	1.62302	0.301179	5.38887	7.09e-08	3.4e-06	MT2A
ENSG00000181804.15	27.8088	3.94367	0.731715	5.38962	7.06e-08	3.4e-06	SLC9A9
ENSG00000068885.15	949.331	1.20909	0.224544	5.38466	7.26e-08	3.46e-06	IFT80
ENSG00000186815.12	184.846	1.86391	0.346167	5.38443	7.27e-08	3.46e-06	TPCN1
ENSG00000123136.15	853.032	-1.09613	0.203666	-5.38198	7.37e-08	3.5e-06	DDX39A
ENSG00000184983.11	722.906	-1.27783	0.237546	-5.37931	7.48e-08	3.54e-06	NDUFA6
ENSG00000164404.8	78.4942	2.20886	0.411301	5.37042	7.86e-08	3.71e-06	GDF9
ENSG00000073111.14	387.844	-1.44068	0.268435	-5.36696	8.01e-08	3.77e-06	MCM2
ENSG00000087085.15	151.855	1.95444	0.364274	5.36528	8.08e-08	3.79e-06	ACHE
ENSG00000160211.19	1093.35	1.34516	0.250726	5.36505	8.09e-08	3.79e-06	G6PD
ENSG00000125462.18	16034.8	-1.57106	0.293177	-5.35875	8.38e-08	3.91e-06	C1orf61
ENSG00000100626.17	83.379	1.91343	0.357116	5.35801	8.41e-08	3.91e-06	GALNT16
ENSG00000139880.19	343.989	-1.45997	0.272671	-5.3543	8.59e-08	3.97e-06	CDH24
ENSG00000132031.13	23.1436	5.02606	0.938709	5.35422	8.59e-08	3.97e-06	MATN3
ENSG00000170439.7	2324.36	2.01308	0.376061	5.35306	8.65e-08	3.99e-06	METTL7B
ENSG00000123700.4	84.4052	2.73066	0.510719	5.3467	8.96e-08	4.12e-06	KCNJ2
ENSG00000245498.7	132.934	1.68855	0.316379	5.3371	9.44e-08	4.33e-06	AP000866.1
ENSG00000249550.7	26.3586	5.66063	1.0613	5.33366	9.63e-08	4.4e-06	LINC01234
ENSG00000152580.8	22.2845	7.79547	1.46191	5.33239	9.69e-08	4.42e-06	IGSF10
ENSG00000100077.15	178.855	1.60273	0.300949	5.32558	1.01e-07	4.58e-06	GRK3
ENSG00000167995.16	265.874	1.86905	0.351059	5.32402	1.01e-07	4.6e-06	BEST1
ENSG00000006757.12	83.6021	2.53756	0.476694	5.32324	1.02e-07	4.6e-06	PNPLA4
ENSG00000172403.11	23.1218	5.93662	1.11525	5.32311	1.02e-07	4.6e-06	SYNPO2
ENSG00000030582.18	1045.7	1.19432	0.224575	5.31813	1.05e-07	4.72e-06	GRN
ENSG00000183688.4	219.904	1.84625	0.347431	5.31401	1.07e-07	4.81e-06	RFLNB
ENSG00000049089.15	89.1576	2.70887	0.510374	5.30762	1.11e-07	4.97e-06	COL9A2
ENSG00000163293.12	29.5406	5.87723	1.10763	5.30614	1.12e-07	4.99e-06	NIPAL1
ENSG00000151623.15	49.4907	2.92853	0.551929	5.306	1.12e-07	4.99e-06	NR3C2
ENSG00000105737.9	540.247	-1.55186	0.292837	-5.29939	1.16e-07	5.16e-06	GRIK5
ENSG00000137575.12	3827.12	1.15841	0.21862	5.29874	1.17e-07	5.16e-06	SDCBP
ENSG00000080031.10	31.714	4.42764	0.836152	5.29525	1.19e-07	5.25e-06	PTPRH
ENSG00000271614.1	55.2886	2.93015	0.55363	5.29262	1.21e-07	5.31e-06	ATP2B1-AS1
ENSG00000235162.8	251.565	1.46796	0.277545	5.28909	1.23e-07	5.4e-06	C12orf75
ENSG00000224189.8	91.2048	2.00534	0.379593	5.28288	1.27e-07	5.57e-06	HAGLR
ENSG00000163412.13	164.355	1.9073	0.361144	5.28126	1.28e-07	5.6e-06	EIF4E3
ENSG00000109689.16	1564.13	1.19542	0.226655	5.27419	1.33e-07	5.81e-06	STIM2
ENSG00000148204.12	366.395	-1.56036	0.296049	-5.27061	1.36e-07	5.91e-06	CRB2
ENSG00000259207.7	42.9648	2.55414	0.48498	5.26649	1.39e-07	6.02e-06	ITGB3
ENSG00000135446.17	1029.7	-1.09962	0.208882	-5.26429	1.41e-07	6.08e-06	CDK4
ENSG00000143341.12	20.6479	7.66156	1.45552	5.2638	1.41e-07	6.08e-06	HMCN1
ENSG00000143476.18	564.315	-1.18566	0.225302	-5.26253	1.42e-07	6.11e-06	DTL
ENSG00000287990.1	71.749	3.95976	0.753177	5.25741	1.46e-07	6.26e-06	AL358334.4
ENSG00000147255.19	71.2379	2.37934	0.45325	5.2495	1.53e-07	6.52e-06	IGSF1
ENSG00000065361.15	527.714	-1.18332	0.225482	-5.24795	1.54e-07	6.56e-06	ERBB3
ENSG00000223573.7	42.6643	2.68653	0.511984	5.24729	1.54e-07	6.56e-06	TINCR
ENSG00000110237.5	1169.82	-1.33586	0.254777	-5.24325	1.58e-07	6.67e-06	ARHGEF17
ENSG00000159176.14	1138.1	1.41477	0.269794	5.24389	1.57e-07	6.67e-06	CSRP1
ENSG00000085840.13	167.491	-1.49729	0.286544	-5.22532	1.74e-07	7.32e-06	ORC1
ENSG00000130768.15	24.7317	4.37888	0.837977	5.22554	1.74e-07	7.32e-06	SMPDL3B
ENSG00000174059.17	24.9343	4.48397	0.85826	5.22449	1.75e-07	7.33e-06	CD34
ENSG00000169432.16	16.1456	7.35347	1.40926	5.21798	1.81e-07	7.57e-06	SCN9A
ENSG00000165097.16	659.509	1.51443	0.290617	5.21107	1.88e-07	7.84e-06	KDM1B
ENSG00000089057.15	2793.31	1.26158	0.242123	5.21049	1.88e-07	7.85e-06	SLC23A2
ENSG00000144118.14	405.557	1.20794	0.23213	5.2037	1.95e-07	8.12e-06	RALB
ENSG00000127564.17	185.904	-1.58197	0.30437	-5.19753	2.02e-07	8.35e-06	PKMYT1
ENSG00000115875.19	844.317	-1.31431	0.252845	-5.19809	2.01e-07	8.35e-06	SRSF7
ENSG00000177706.9	430.58	-1.40867	0.271518	-5.18814	2.12e-07	8.76e-06	FAM20C
ENSG00000160360.13	461.785	-1.40285	0.270693	-5.18243	2.19e-07	8.97e-06	GPSM1
ENSG00000233791.5	19.8949	5.46095	1.05377	5.1823	2.19e-07	8.97e-06	LINC01136
ENSG00000087303.18	45.1141	3.07875	0.594038	5.18274	2.19e-07	8.97e-06	NID2
ENSG00000137767.14	65.4432	2.45446	0.473721	5.18122	2.2e-07	9e-06	SQOR
ENSG00000173868.11	17.5525	7.47053	1.44334	5.17587	2.27e-07	9.24e-06	PHOSPHO1
ENSG00000115758.13	3714.17	1.68088	0.324805	5.17505	2.28e-07	9.26e-06	ODC1
ENSG00000114251.14	140.919	2.00308	0.387772	5.16561	2.4e-07	9.71e-06	WNT5A
ENSG00000230805.8	28.4562	4.71702	0.913475	5.16381	2.42e-07	9.77e-06	AL132709.7
ENSG00000163249.12	283.999	1.80552	0.349666	5.16354	2.42e-07	9.77e-06	CCNYL1
ENSG00000131095.13	63942.4	-1.03706	0.200969	-5.1603	2.47e-07	9.92e-06	GFAP
ENSG00000171812.13	29.1112	6.72747	1.3046	5.15672	2.51e-07	9.99e-06	COL8A2
ENSG00000167244.21	14.8135	7.21861	1.39983	5.15678	2.51e-07	9.99e-06	IGF2
ENSG00000137463.5	37.0545	2.83579	0.549883	5.15707	2.51e-07	9.99e-06	MGARP
ENSG00000242294.6	618.95	1.26743	0.24573	5.15783	2.5e-07	9.99e-06	STAG3L5P
ENSG00000057704.13	81.444	2.21817	0.43007	5.15769	2.5e-07	9.99e-06	TMCC3
ENSG00000273702.1	69.0724	2.19048	0.425311	5.1503	2.6e-07	1.02e-05	AC091271.1
ENSG00000109158.11	48.1431	2.78047	0.539852	5.15044	2.6e-07	1.02e-05	GABRA4
ENSG00000281189.1	51.5831	3.14624	0.610611	5.15261	2.57e-07	1.02e-05	GHET1
ENSG00000214456.8	32.6603	4.66163	0.905124	5.15026	2.6e-07	1.02e-05	PLIN5
ENSG00000176124.14	235.305	1.40735	0.273393	5.14771	2.64e-07	1.03e-05	DLEU1
ENSG00000152413.15	345.467	1.51035	0.29332	5.14916	2.62e-07	1.03e-05	HOMER1
ENSG00000166535.20	22.0652	4.57905	0.890647	5.14127	2.73e-07	1.05e-05	A2ML1
ENSG00000054803.4	22.8841	4.18499	0.813656	5.14343	2.7e-07	1.05e-05	CBLN4
ENSG00000120217.14	23.9993	3.77791	0.734284	5.14502	2.67e-07	1.05e-05	CD274
ENSG00000196482.17	34.0343	3.19852	0.622031	5.14206	2.72e-07	1.05e-05	ESRRG
ENSG00000188536.13	14.72	7.213	1.40289	5.14154	2.72e-07	1.05e-05	HBA2
ENSG00000128040.11	15.0571	7.23712	1.40772	5.14102	2.73e-07	1.05e-05	SPINK2
ENSG00000112981.5	44.8909	2.74738	0.534671	5.13845	2.77e-07	1.06e-05	NME5
ENSG00000157654.18	336.33	1.33818	0.260353	5.13987	2.75e-07	1.06e-05	PALM2-AKAP2
ENSG00000135605.13	22.3972	6.83098	1.3289	5.14033	2.74e-07	1.06e-05	TEC
ENSG00000111424.11	35.5083	3.66502	0.713403	5.13738	2.79e-07	1.07e-05	VDR
ENSG00000136827.12	344.739	-1.2236	0.238299	-5.13474	2.83e-07	1.08e-05	TOR1A
ENSG00000089199.10	449.213	1.39692	0.272195	5.13205	2.87e-07	1.09e-05	CHGB
ENSG00000173890.17	23.1073	7.00262	1.36463	5.13151	2.87e-07	1.09e-05	GPR160
ENSG00000165194.15	309.079	1.91644	0.373538	5.13051	2.89e-07	1.09e-05	PCDH19
ENSG00000198753.12	643.873	-2.00813	0.392109	-5.12137	3.03e-07	1.15e-05	PLXNB3
ENSG00000177108.5	248.122	-1.4388	0.281038	-5.11957	3.06e-07	1.15e-05	ZDHHC22
ENSG00000164440.15	84.6109	2.12717	0.415566	5.11874	3.08e-07	1.16e-05	TXLNB
ENSG00000003249.13	753.484	-1.69852	0.33198	-5.11632	3.12e-07	1.17e-05	DBNDD1
ENSG00000130751.10	45.4261	2.6206	0.512329	5.11508	3.14e-07	1.17e-05	NPAS1
ENSG00000184009.12	23151.2	1.08859	0.212899	5.11317	3.17e-07	1.18e-05	ACTG1
ENSG00000066248.15	35.0405	3.55627	0.695499	5.11327	3.17e-07	1.18e-05	NGEF
ENSG00000155115.7	425.947	-1.78195	0.348767	-5.10929	3.23e-07	1.2e-05	GTF3C6
ENSG00000164692.17	454.463	1.63223	0.319516	5.10845	3.25e-07	1.21e-05	COL1A2
ENSG00000137819.14	29.2532	4.55793	0.893096	5.10352	3.33e-07	1.23e-05	PAQR5
ENSG00000078114.18	203.413	1.48435	0.290962	5.10151	3.37e-07	1.24e-05	NEBL
ENSG00000277159.1	64.4909	2.17145	0.426172	5.09525	3.48e-07	1.28e-05	AL139384.2
ENSG00000095587.9	26.3182	3.8006	0.745953	5.09496	3.49e-07	1.28e-05	TLL2
ENSG00000102007.11	307.348	-1.26521	0.248404	-5.09336	3.52e-07	1.29e-05	PLP2
ENSG00000001461.17	376.629	1.47489	0.289737	5.09046	3.57e-07	1.31e-05	NIPAL3
ENSG00000184497.13	13.863	6.8275	1.34291	5.08412	3.69e-07	1.35e-05	TMEM255B
ENSG00000141510.17	379.098	-1.25942	0.248039	-5.07748	3.82e-07	1.39e-05	TP53
ENSG00000284862.3	17.7737	7.49297	1.47632	5.07544	3.87e-07	1.41e-05	CCDC39
ENSG00000174600.14	45.8685	3.38053	0.666288	5.07367	3.9e-07	1.42e-05	CMKLR1
ENSG00000164032.12	1937.46	-1.05666	0.20841	-5.0701	3.98e-07	1.44e-05	H2AFZ
ENSG00000058866.15	302.431	1.28322	0.253224	5.06753	4.03e-07	1.46e-05	DGKG
ENSG00000100387.9	384.221	-1.35533	0.267528	-5.06613	4.06e-07	1.46e-05	RBX1
ENSG00000080573.7	266.07	1.76687	0.348873	5.06452	4.09e-07	1.47e-05	COL5A3
ENSG00000169855.20	2163.32	1.05794	0.208992	5.06212	4.15e-07	1.49e-05	ROBO1
ENSG00000178719.17	957.925	-1.06513	0.210566	-5.05842	4.23e-07	1.51e-05	GRINA
ENSG00000076344.16	138.776	-1.50723	0.297921	-5.05916	4.21e-07	1.51e-05	RGS11
ENSG00000103196.12	312.456	2.01606	0.398801	5.05531	4.3e-07	1.53e-05	CRISPLD2
ENSG00000231925.11	626.548	-1.23079	0.243963	-5.04499	4.54e-07	1.61e-05	TAPBP
ENSG00000163347.6	24.9994	6.12321	1.21442	5.04207	4.61e-07	1.63e-05	CLDN1
ENSG00000106537.8	1063.89	1.35791	0.269256	5.04319	4.58e-07	1.63e-05	TSPAN13
ENSG00000182463.16	252.692	1.89679	0.376625	5.03628	4.75e-07	1.68e-05	TSHZ2
ENSG00000135414.10	2752.28	1.20489	0.239339	5.03422	4.8e-07	1.69e-05	GDF11
ENSG00000234028.3	75.3802	2.42281	0.482152	5.02499	5.03e-07	1.76e-05	EIF2AK3-DT
ENSG00000131979.19	97.4971	2.21803	0.441367	5.02537	5.02e-07	1.76e-05	GCH1
ENSG00000112699.11	164.154	1.51559	0.301603	5.02512	5.03e-07	1.76e-05	GMDS
ENSG00000260231.2	163.482	2.14044	0.426022	5.02426	5.05e-07	1.77e-05	KDM7A-DT
ENSG00000142327.13	143.553	-1.65407	0.329435	-5.02095	5.14e-07	1.79e-05	RNPEPL1
ENSG00000092445.12	966.821	-1.50267	0.299409	-5.01878	5.2e-07	1.81e-05	TYRO3
ENSG00000090339.9	104.153	2.67045	0.532216	5.0176	5.23e-07	1.82e-05	ICAM1
ENSG00000206053.13	652.11	-1.21911	0.243094	-5.01499	5.3e-07	1.84e-05	JPT2
ENSG00000130032.16	27.531	6.68124	1.33311	5.01176	5.39e-07	1.86e-05	PRRG3
ENSG00000186854.11	18.6439	6.75221	1.34708	5.01249	5.37e-07	1.86e-05	TRABD2A
ENSG00000213062.5	132.849	1.83036	0.365512	5.00766	5.51e-07	1.9e-05	Z99572.1
ENSG00000092470.12	385.293	-1.28573	0.256841	-5.00595	5.56e-07	1.91e-05	WDR76
ENSG00000170775.3	88.4271	2.0687	0.413428	5.00377	5.62e-07	1.92e-05	GPR37
ENSG00000185477.5	21.3435	4.65673	0.930581	5.00411	5.61e-07	1.92e-05	GPRIN3
ENSG00000251410.2	13.7288	7.11519	1.42278	5.00093	5.71e-07	1.93e-05	AC007106.1
ENSG00000224609.8	29.615	4.46022	0.891581	5.0026	5.66e-07	1.93e-05	AC093425.1
ENSG00000260804.3	311.196	-1.19491	0.238919	-5.00131	5.69e-07	1.93e-05	LINC01963
ENSG00000184788.13	34.9066	2.86682	0.573256	5.00094	5.71e-07	1.93e-05	SATL1
ENSG00000110660.15	113.657	1.82883	0.365636	5.00178	5.68e-07	1.93e-05	SLC35F2
ENSG00000145246.14	588.425	1.17274	0.234563	4.99968	5.74e-07	1.94e-05	ATP10D
ENSG00000100558.9	13.6473	7.10226	1.42037	5.00029	5.72e-07	1.94e-05	PLEK2
ENSG00000095932.7	22.69	4.49772	0.899936	4.99783	5.8e-07	1.95e-05	SMIM24
ENSG00000106868.16	191.828	-1.70849	0.342042	-4.99498	5.88e-07	1.98e-05	SUSD1
ENSG00000172824.16	13.1661	7.05282	1.41234	4.9937	5.92e-07	1.99e-05	CES4A
ENSG00000280278.1	22.0803	4.06065	0.813831	4.98955	6.05e-07	2.03e-05	AC009108.5
ENSG00000180815.14	20.6165	4.08377	0.819049	4.98598	6.16e-07	2.06e-05	MAP3K15
ENSG00000112118.20	974.585	-1.26913	0.254671	-4.98342	6.25e-07	2.08e-05	MCM3
ENSG00000008441.16	1947.18	-1.38663	0.278472	-4.97944	6.38e-07	2.12e-05	NFIX
ENSG00000139182.15	616.884	1.07289	0.215551	4.97745	6.44e-07	2.14e-05	CLSTN3
ENSG00000111057.11	13.3875	7.07809	1.42222	4.97678	6.47e-07	2.14e-05	KRT18
ENSG00000198589.13	653.71	1.19033	0.239165	4.97701	6.46e-07	2.14e-05	LRBA
ENSG00000268941.2	28.1152	4.60277	0.925546	4.97303	6.59e-07	2.17e-05	LINC01711
ENSG00000279024.1	52.9812	4.15775	0.836235	4.97198	6.63e-07	2.18e-05	AC112255.1
ENSG00000023191.17	452.496	-1.12044	0.225369	-4.97157	6.64e-07	2.18e-05	RNH1
ENSG00000070601.10	33.602	2.8549	0.574664	4.96795	6.77e-07	2.22e-05	FRMPD1
ENSG00000164181.14	20.0844	5.28918	1.06532	4.96488	6.87e-07	2.24e-05	ELOVL7
ENSG00000153558.16	144.392	1.49686	0.301454	4.96546	6.85e-07	2.24e-05	FBXL2
ENSG00000172296.13	16.8147	5.45678	1.09911	4.96473	6.88e-07	2.24e-05	SPTLC3
ENSG00000105607.13	269.102	1.74669	0.352142	4.96018	7.04e-07	2.29e-05	GCDH
ENSG00000164879.7	141.797	1.75797	0.354604	4.95756	7.14e-07	2.31e-05	CA3
ENSG00000065675.15	45.5044	2.52167	0.508665	4.95743	7.14e-07	2.31e-05	PRKCQ
ENSG00000071539.14	205.111	-1.45125	0.292818	-4.95616	7.19e-07	2.33e-05	TRIP13
ENSG00000240065.8	273.53	-1.28508	0.259355	-4.95491	7.24e-07	2.34e-05	PSMB9
ENSG00000163285.8	20.5871	5.93657	1.19878	4.9522	7.34e-07	2.36e-05	GABRG1
ENSG00000234571.2	27.6012	4.67369	0.944328	4.94922	7.45e-07	2.4e-05	AC239798.2
ENSG00000167670.16	319.185	-1.36183	0.275281	-4.94704	7.53e-07	2.42e-05	CHAF1A
ENSG00000015475.18	519.992	-1.82851	0.369809	-4.94447	7.64e-07	2.44e-05	BID
ENSG00000196338.12	853.91	-1.55741	0.315015	-4.9439	7.66e-07	2.45e-05	NLGN3
ENSG00000182551.14	668.605	-1.15572	0.23401	-4.93877	7.86e-07	2.51e-05	ADI1
ENSG00000066027.12	633.58	1.0515	0.21307	4.93499	8.02e-07	2.55e-05	PPP2R5A
ENSG00000063127.16	30.2696	-2.82449	0.573659	-4.92363	8.5e-07	2.7e-05	SLC6A16
ENSG00000180425.11	259.826	1.40826	0.286159	4.92125	8.6e-07	2.72e-05	C11orf71
ENSG00000196169.15	18.771	4.82471	0.980375	4.92129	8.6e-07	2.72e-05	KIF19
ENSG00000070182.21	129.765	1.69219	0.343807	4.92193	8.57e-07	2.72e-05	SPTB
ENSG00000174243.10	1225.77	-0.985289	0.200265	-4.91994	8.66e-07	2.73e-05	DDX23
ENSG00000184599.13	20.4728	4.74619	0.965722	4.91465	8.89e-07	2.8e-05	TAFA3
ENSG00000132561.14	952.666	-1.36538	0.277975	-4.91189	9.02e-07	2.82e-05	MATN2
ENSG00000101605.12	26.5019	3.81936	0.777586	4.91181	9.02e-07	2.82e-05	MYOM1
ENSG00000196636.7	235.08	1.35906	0.276652	4.91253	8.99e-07	2.82e-05	SDHAF3
ENSG00000175868.14	28.6891	4.04612	0.824089	4.90981	9.12e-07	2.85e-05	CALCB
ENSG00000170959.14	17.6068	5.38553	1.0976	4.90663	9.27e-07	2.88e-05	DCDC1
ENSG00000164251.5	153.604	1.59657	0.325347	4.90727	9.24e-07	2.88e-05	F2RL1
ENSG00000091651.9	290.651	-1.23722	0.252341	-4.90297	9.44e-07	2.93e-05	ORC6
ENSG00000184307.15	109.3	1.71573	0.350408	4.89637	9.76e-07	3.02e-05	ZDHHC23
ENSG00000139219.19	20.7778	4.87029	0.995434	4.89263	9.95e-07	3.08e-05	COL2A1
ENSG00000248383.4	61.1132	2.02439	0.413871	4.89137	1e-06	3.09e-05	PCDHAC1
ENSG00000271646.1	92.7896	1.96816	0.402558	4.88914	1.01e-06	3.11e-05	AC099343.3
ENSG00000244968.7	115.564	1.65407	0.338306	4.88929	1.01e-06	3.11e-05	LIFR-AS1
ENSG00000267470.6	37.3092	-2.44057	0.499162	-4.88933	1.01e-06	3.11e-05	ZNF571-AS1
ENSG00000187630.17	78.9658	-1.99292	0.407715	-4.88802	1.02e-06	3.12e-05	DHRS4L2
ENSG00000247796.3	53.6268	2.07597	0.424833	4.88656	1.03e-06	3.13e-05	AC008966.1
ENSG00000113621.14	404.426	-1.62226	0.331995	-4.88641	1.03e-06	3.13e-05	TXNDC15
ENSG00000104267.10	1563.08	1.22244	0.250292	4.88404	1.04e-06	3.15e-05	CA2
ENSG00000196968.11	156.047	-1.45111	0.297084	-4.88453	1.04e-06	3.15e-05	FUT11
ENSG00000100219.16	198.001	-1.38006	0.282499	-4.88519	1.03e-06	3.15e-05	XBP1
ENSG00000134490.14	65.5234	2.33913	0.479113	4.88222	1.05e-06	3.18e-05	TMEM241
ENSG00000137331.12	43.7092	4.23827	0.868256	4.88136	1.05e-06	3.19e-05	IER3
ENSG00000169418.10	31.512	3.13684	0.643156	4.87726	1.08e-06	3.25e-05	NPR1
ENSG00000203722.8	23.8428	5.38262	1.10409	4.87516	1.09e-06	3.28e-05	RAET1G
ENSG00000107295.10	260.723	1.50858	0.309731	4.87063	1.11e-06	3.35e-05	SH3GL2
ENSG00000168393.13	267.245	-1.34144	0.275604	-4.86728	1.13e-06	3.4e-05	DTYMK
ENSG00000088836.14	81.4152	2.25976	0.464318	4.86684	1.13e-06	3.4e-05	SLC4A11
ENSG00000143469.19	229.812	1.39841	0.287506	4.86393	1.15e-06	3.44e-05	SYT14
ENSG00000151718.16	264.234	1.60572	0.330115	4.86411	1.15e-06	3.44e-05	WWC2
ENSG00000213578.6	31.9043	3.41333	0.702111	4.86153	1.16e-06	3.47e-05	CPLX3
ENSG00000172061.8	33.0604	3.98352	0.819615	4.86023	1.17e-06	3.49e-05	LRRC15
ENSG00000171206.14	222.11	-1.65276	0.340202	-4.85816	1.18e-06	3.52e-05	TRIM8
ENSG00000037280.16	20.0978	6.59127	1.35718	4.85659	1.19e-06	3.54e-05	FLT4
ENSG00000283757.1	62.6963	2.4497	0.504662	4.85414	1.21e-06	3.57e-05	AL031686.1
ENSG00000179242.16	827.161	-1.02637	0.211442	-4.85414	1.21e-06	3.57e-05	CDH4
ENSG00000161547.16	1399.95	-1.17591	0.242274	-4.85362	1.21e-06	3.57e-05	SRSF2
ENSG00000124207.17	2010.97	-0.981218	0.202291	-4.85054	1.23e-06	3.62e-05	CSE1L
ENSG00000159023.21	227.272	1.30195	0.268458	4.84975	1.24e-06	3.62e-05	EPB41
ENSG00000184445.12	541.962	-1.11611	0.230112	-4.85029	1.23e-06	3.62e-05	KNTC1
ENSG00000162909.18	2229.82	-1.30383	0.268944	-4.84798	1.25e-06	3.65e-05	CAPN2
ENSG00000152642.10	342.189	1.40435	0.2897	4.84759	1.25e-06	3.65e-05	GPD1L
ENSG00000158813.18	47.4994	3.54814	0.733285	4.83869	1.31e-06	3.81e-05	EDA
ENSG00000198830.11	4719.16	-1.11988	0.231484	-4.83782	1.31e-06	3.82e-05	HMGN2
ENSG00000196642.19	617.618	-1.1007	0.227932	-4.82908	1.37e-06	3.99e-05	RABL6
ENSG00000101327.9	20.4746	5.27037	1.09168	4.82776	1.38e-06	4e-05	PDYN
ENSG00000250565.7	173.525	1.42422	0.29526	4.82361	1.41e-06	4.08e-05	ATP6V1E2
ENSG00000167632.16	462.034	1.23077	0.255346	4.82002	1.44e-06	4.15e-05	TRAPPC9
ENSG00000142798.20	404.36	1.49302	0.310081	4.81493	1.47e-06	4.25e-05	HSPG2
ENSG00000234156.3	15.1763	6.54224	1.35927	4.81304	1.49e-06	4.28e-05	AL359636.2
ENSG00000111348.9	19.6689	5.28569	1.09845	4.81197	1.49e-06	4.28e-05	ARHGDIB
ENSG00000266094.8	58.89	2.20093	0.457322	4.81265	1.49e-06	4.28e-05	RASSF5
ENSG00000105518.14	462.699	1.16604	0.242325	4.81189	1.5e-06	4.28e-05	TMEM205
ENSG00000101003.10	481.285	-1.21676	0.252965	-4.80999	1.51e-06	4.32e-05	GINS1
ENSG00000111602.12	1022.29	-1.0179	0.211646	-4.80945	1.51e-06	4.32e-05	TIMELESS
ENSG00000276462.2	26.2637	3.37557	0.702096	4.80784	1.53e-06	4.35e-05	BX255923.2
ENSG00000087884.14	185.082	1.5342	0.319348	4.80418	1.55e-06	4.41e-05	AAMDC
ENSG00000215452.5	44.0028	3.11704	0.648828	4.80412	1.55e-06	4.41e-05	ZNF663P
ENSG00000285825.2	95.6519	1.75737	0.365937	4.8024	1.57e-06	4.44e-05	CCDC15-DT
ENSG00000172889.16	48.2497	2.28627	0.476213	4.80095	1.58e-06	4.47e-05	EGFL7
ENSG00000137285.10	4927.69	-1.22647	0.255502	-4.80026	1.58e-06	4.48e-05	TUBB2B
ENSG00000154146.13	212.526	1.32863	0.276982	4.7968	1.61e-06	4.55e-05	NRGN
ENSG00000001084.13	332.662	1.70598	0.355785	4.79497	1.63e-06	4.58e-05	GCLC
ENSG00000278934.1	82.9184	1.93071	0.402785	4.79339	1.64e-06	4.61e-05	AC117489.1
ENSG00000076382.17	1065.16	-1.3823	0.288426	-4.79256	1.65e-06	4.62e-05	SPAG5
ENSG00000107551.21	1088.58	-1.09404	0.22832	-4.79169	1.65e-06	4.63e-05	RASSF4
ENSG00000104369.5	27.3575	3.72461	0.77799	4.78748	1.69e-06	4.72e-05	JPH1
ENSG00000188368.9	23.3296	-3.26947	0.6832	-4.78552	1.71e-06	4.76e-05	PRR19
ENSG00000144136.11	578.925	-1.10755	0.231672	-4.78071	1.75e-06	4.87e-05	SLC20A1
ENSG00000187094.12	46.1078	2.66038	0.556701	4.77883	1.76e-06	4.91e-05	CCK
ENSG00000176697.19	25.7554	3.73202	0.781249	4.77699	1.78e-06	4.94e-05	BDNF
ENSG00000205293.5	14.5319	7.18838	1.50588	4.77353	1.81e-06	5.02e-05	LINC01602
ENSG00000214548.18	4944.99	1.02589	0.215085	4.76969	1.85e-06	5.11e-05	MEG3
ENSG00000185664.14	19.7396	4.62977	0.970744	4.7693	1.85e-06	5.11e-05	PMEL
ENSG00000259781.1	279.93	-1.46175	0.306563	-4.7682	1.86e-06	5.13e-05	HMGB1P6
ENSG00000274615.1	21.8515	-4.66101	0.978032	-4.7657	1.88e-06	5.18e-05	AC233968.1
ENSG00000076003.5	1040.92	-0.996157	0.209087	-4.76431	1.9e-06	5.21e-05	MCM6
ENSG00000152082.14	121.098	-1.91507	0.402129	-4.76234	1.91e-06	5.25e-05	MZT2B
ENSG00000144354.14	989.426	-1.36898	0.287695	-4.75843	1.95e-06	5.33e-05	CDCA7
ENSG00000157470.12	34.5108	4.79133	1.00699	4.75808	1.95e-06	5.33e-05	FAM81A
ENSG00000177732.8	448.448	-1.17143	0.246147	-4.75906	1.94e-06	5.33e-05	SOX12
ENSG00000176890.16	540.342	-1.58945	0.334012	-4.75866	1.95e-06	5.33e-05	TYMS
ENSG00000167676.4	37.2575	3.4457	0.724431	4.75643	1.97e-06	5.36e-05	PLIN4
ENSG00000149564.12	46.012	2.36254	0.496764	4.75586	1.98e-06	5.37e-05	ESAM
ENSG00000101856.10	1638.62	-1.00738	0.211874	-4.75463	1.99e-06	5.39e-05	PGRMC1
ENSG00000139200.13	255.128	-1.3705	0.288284	-4.75399	1.99e-06	5.4e-05	PIANP
ENSG00000158473.6	20.8192	5.86847	1.23473	4.75286	2.01e-06	5.41e-05	CD1D
ENSG00000143436.11	399.957	-1.30999	0.275603	-4.75317	2e-06	5.41e-05	MRPL9
ENSG00000272686.1	158.423	1.41684	0.298245	4.7506	2.03e-06	5.47e-05	AC006333.2
ENSG00000166578.10	33.6347	2.91738	0.614968	4.74395	2.1e-06	5.64e-05	IQCD
ENSG00000152127.9	1589.55	1.08578	0.228925	4.74293	2.11e-06	5.66e-05	MGAT5
ENSG00000102362.15	59.7317	1.91992	0.40485	4.7423	2.11e-06	5.67e-05	SYTL4
ENSG00000172508.10	36.7116	2.79761	0.590083	4.74105	2.13e-06	5.69e-05	CARNS1
ENSG00000137699.17	22.2921	5.24501	1.10655	4.73995	2.14e-06	5.71e-05	TRIM29
ENSG00000278916.1	31.4269	2.91471	0.615133	4.73835	2.15e-06	5.74e-05	CEP83-DT
ENSG00000187243.16	1211.1	-1.19135	0.251423	-4.73842	2.15e-06	5.74e-05	MAGED4B
ENSG00000077514.9	306.155	-1.3497	0.285018	-4.73549	2.19e-06	5.81e-05	POLD3
ENSG00000172270.19	3466.28	0.938169	0.198342	4.73005	2.24e-06	5.96e-05	BSG
ENSG00000183935.5	59.799	2.6883	0.568834	4.72599	2.29e-06	6.07e-05	HTR7P1
ENSG00000139988.10	34.6241	3.09769	0.655613	4.72488	2.3e-06	6.09e-05	RDH12
ENSG00000002933.9	46.738	2.38701	0.505291	4.72403	2.31e-06	6.11e-05	TMEM176A
ENSG00000135049.15	408.477	1.36503	0.289138	4.72103	2.35e-06	6.19e-05	AGTPBP1
ENSG00000164746.14	21.6995	5.89918	1.24971	4.72042	2.35e-06	6.2e-05	C7orf57
ENSG00000273079.5	230.404	1.81414	0.384434	4.71898	2.37e-06	6.23e-05	GRIN2B
ENSG00000009950.16	34.2176	4.12363	0.874099	4.71758	2.39e-06	6.27e-05	MLXIPL
ENSG00000152936.10	14.6996	7.18911	1.52448	4.71579	2.41e-06	6.31e-05	LMNTD1
ENSG00000169918.9	98.9588	2.26559	0.480969	4.71048	2.47e-06	6.47e-05	OTUD7A
ENSG00000114861.20	78.4667	3.40839	0.724023	4.70758	2.51e-06	6.55e-05	FOXP1
ENSG00000155016.18	284.906	1.45091	0.308451	4.70386	2.55e-06	6.66e-05	CYP2U1
ENSG00000249115.9	236.201	-1.49141	0.317227	-4.70139	2.58e-06	6.73e-05	HAUS5
ENSG00000229140.10	20.74	5.79918	1.2344	4.69797	2.63e-06	6.83e-05	CCDC26
ENSG00000135114.12	57.8374	3.17549	0.676288	4.69546	2.66e-06	6.91e-05	OASL
ENSG00000156239.12	350.483	1.29738	0.276357	4.6946	2.67e-06	6.92e-05	N6AMT1
ENSG00000188505.5	18.9795	6.60567	1.40817	4.69095	2.72e-06	7.04e-05	NCCRP1
ENSG00000164929.17	1253.72	-1.22856	0.261929	-4.69041	2.73e-06	7.05e-05	BAALC
ENSG00000050628.20	16.5114	6.51402	1.38894	4.68991	2.73e-06	7.05e-05	PTGER3
ENSG00000074964.17	215.853	-1.39205	0.297042	-4.68638	2.78e-06	7.16e-05	ARHGEF10L
ENSG00000111261.14	68.5446	1.96419	0.419256	4.68493	2.8e-06	7.2e-05	MANSC1
ENSG00000198911.12	1782.59	-0.946656	0.202403	-4.67709	2.91e-06	7.47e-05	SREBF2
ENSG00000134256.12	284.209	-1.81887	0.388978	-4.67603	2.92e-06	7.5e-05	CD101
ENSG00000197558.12	41.0583	3.0905	0.661174	4.67426	2.95e-06	7.55e-05	SSPO
ENSG00000128591.15	1847.6	1.36685	0.292502	4.67295	2.97e-06	7.59e-05	FLNC
ENSG00000157502.13	19.5229	4.15978	0.890556	4.671	3e-06	7.65e-05	PWWP3B
ENSG00000185567.7	267.989	2.08939	0.448025	4.66356	3.11e-06	7.92e-05	AHNAK2
ENSG00000124006.15	588.025	-1.64415	0.352886	-4.65914	3.18e-06	8.08e-05	OBSL1
ENSG00000103326.12	125.415	-1.59993	0.343582	-4.65661	3.21e-06	8.16e-05	CAPN15
ENSG00000186480.13	1062.81	-1.66364	0.357326	-4.6558	3.23e-06	8.18e-05	INSIG1
ENSG00000155085.15	187.796	1.34635	0.289266	4.65436	3.25e-06	8.23e-05	AK9
ENSG00000273213.3	161.689	1.61306	0.346687	4.65278	3.27e-06	8.28e-05	HIST2H3PS2
ENSG00000122735.16	14.2945	7.17331	1.54347	4.64752	3.36e-06	8.48e-05	DNAI1
ENSG00000177030.16	328.629	-1.25256	0.269685	-4.64454	3.41e-06	8.59e-05	DEAF1
ENSG00000174428.18	248.056	-1.43837	0.309715	-4.64416	3.41e-06	8.59e-05	GTF2IRD2B
ENSG00000165478.7	1686.87	-1.85844	0.400514	-4.64013	3.48e-06	8.73e-05	HEPACAM
ENSG00000147592.9	198.676	1.24368	0.268002	4.64058	3.47e-06	8.73e-05	LACTB2
ENSG00000172716.16	23.6655	4.17282	0.899572	4.63868	3.51e-06	8.78e-05	SLFN11
ENSG00000103184.12	26.9066	3.46601	0.747394	4.63747	3.53e-06	8.82e-05	SEC14L5
ENSG00000103888.17	714.854	1.50645	0.324945	4.63602	3.55e-06	8.87e-05	CEMIP
ENSG00000080854.15	452.048	1.19737	0.258312	4.63537	3.56e-06	8.87e-05	IGSF9B
ENSG00000152192.8	26.2585	3.85598	0.831841	4.63547	3.56e-06	8.87e-05	POU4F1
ENSG00000133019.11	204.498	1.99585	0.430872	4.63213	3.62e-06	8.99e-05	CHRM3
ENSG00000142227.11	430.608	-1.29164	0.278891	-4.63134	3.63e-06	8.99e-05	EMP3
ENSG00000235374.2	40.6712	2.46315	0.531826	4.63149	3.63e-06	8.99e-05	SSR4P1
ENSG00000205084.11	218.176	-1.59025	0.34336	-4.63144	3.63e-06	8.99e-05	TMEM231
ENSG00000004468.13	219.547	-1.41337	0.305356	-4.62861	3.68e-06	9.05e-05	CD38
ENSG00000131398.14	179.946	2.28763	0.494216	4.6288	3.68e-06	9.05e-05	KCNC3
ENSG00000132780.17	2272.69	-1.00573	0.21728	-4.62872	3.68e-06	9.05e-05	NASP
ENSG00000128655.18	25.6075	4.87311	1.05273	4.62902	3.67e-06	9.05e-05	PDE11A
ENSG00000144649.9	210.659	-1.79339	0.388268	-4.61896	3.86e-06	9.47e-05	GASK1A
ENSG00000060656.20	64.5918	2.3894	0.517423	4.61788	3.88e-06	9.51e-05	PTPRU
ENSG00000272831.1	140.99	1.39747	0.302821	4.61486	3.93e-06	9.63e-05	AC027644.3
ENSG00000170891.11	22.5679	3.3504	0.726189	4.61368	3.96e-06	9.67e-05	CYTL1
ENSG00000188452.14	11.095	6.80127	1.47492	4.61128	4e-06	9.77e-05	CERKL
ENSG00000092068.20	181.476	1.82154	0.395106	4.61027	4.02e-06	9.8e-05	SLC7A8
ENSG00000102931.8	993.27	-0.971542	0.210797	-4.60889	4.05e-06	9.85e-05	ARL2BP
ENSG00000135677.11	2106.93	1.137	0.246723	4.60842	4.06e-06	9.86e-05	GNS
ENSG00000126522.17	348.65	1.68043	0.364944	4.60462	4.13e-06	0.000100267	ASL
ENSG00000105220.17	1889.51	-0.916234	0.199106	-4.60173	4.19e-06	0.000101517	GPI
ENSG00000177464.5	16.9862	6.49851	1.41301	4.59905	4.24e-06	0.000102515	GPR4
ENSG00000178922.16	51.1775	-1.98935	0.432583	-4.59877	4.25e-06	0.000102515	HYI
ENSG00000074527.12	53.2729	3.56855	0.775929	4.59907	4.24e-06	0.000102515	NTN4
ENSG00000151575.14	119.597	1.67745	0.36484	4.59778	4.27e-06	0.00010285	TEX9
ENSG00000157326.19	89.3759	-1.80283	0.392307	-4.59546	4.32e-06	0.000103846	DHRS4
ENSG00000221818.9	25.899	3.16944	0.690094	4.59277	4.37e-06	0.000105039	EBF2
ENSG00000173805.15	391.91	1.42738	0.31086	4.59172	4.4e-06	0.000105418	HAP1
ENSG00000170011.14	40.8884	2.27829	0.496462	4.58905	4.45e-06	0.000106616	MYRIP
ENSG00000103202.13	542.067	-1.22579	0.26724	-4.58686	4.5e-06	0.000107473	NME4
ENSG00000130590.14	55.2276	-2.08578	0.454739	-4.58677	4.5e-06	0.000107473	SAMD10
ENSG00000236088.10	378.288	1.11915	0.244156	4.58374	4.57e-06	0.000108725	COX10-AS1
ENSG00000181856.15	27.2071	6.17331	1.34678	4.58376	4.57e-06	0.000108725	SLC2A4
ENSG00000187730.9	10.4425	6.71859	1.46602	4.58289	4.59e-06	0.000109008	GABRD
ENSG00000204131.9	45.3159	2.47259	0.540067	4.5783	4.69e-06	0.000111263	NHSL2
ENSG00000197410.14	41.5088	2.47515	0.540704	4.57765	4.7e-06	0.000111449	DCHS2
ENSG00000171914.16	805.525	1.20452	0.263482	4.57156	4.84e-06	0.000114574	TLN2
ENSG00000135951.15	60.2326	2.79473	0.611574	4.56973	4.88e-06	0.000115409	TSGA10
ENSG00000213347.10	110.025	-1.6102	0.35241	-4.56912	4.9e-06	0.000115581	MXD3
ENSG00000102195.10	19.6625	5.72823	1.25395	4.56815	4.92e-06	0.000115948	GPR50
ENSG00000118307.19	24.3914	3.97294	0.869791	4.56769	4.93e-06	0.000116035	CASC1
ENSG00000184887.13	394.983	-1.14836	0.251477	-4.56646	4.96e-06	0.000116548	BTBD6
ENSG00000137726.17	3692.6	-1.03558	0.226814	-4.56577	4.98e-06	0.000116765	FXYD6
ENSG00000102178.13	276.309	-1.22259	0.267808	-4.56515	4.99e-06	0.000116941	UBL4A
ENSG00000146242.8	17.1231	5.05557	1.10788	4.56327	5.04e-06	0.000117826	TPBG
ENSG00000177700.6	616.882	1.22113	0.267755	4.56064	5.1e-06	0.000119141	POLR2L
ENSG00000028137.19	15.1118	6.27473	1.3769	4.55716	5.19e-06	0.00012096	TNFRSF1B
ENSG00000270021.1	50.9419	2.75136	0.604456	4.55179	5.32e-06	0.000123557	AC026691.1
ENSG00000151725.12	699.325	-0.989603	0.2174	-4.55198	5.31e-06	0.000123557	CENPU
ENSG00000171848.15	1206.78	-1.28874	0.283116	-4.552	5.31e-06	0.000123557	RRM2
ENSG00000182809.10	501.314	-1.13002	0.248311	-4.55081	5.34e-06	0.00012396	CRIP2
ENSG00000168397.17	723.89	1.14928	0.252833	4.54562	5.48e-06	0.000126764	ATG4B
ENSG00000134871.19	742.608	-1.00675	0.221483	-4.5455	5.48e-06	0.000126764	COL4A2
ENSG00000116852.14	1803.88	-1.14089	0.251012	-4.54517	5.49e-06	0.000126782	KIF21B
ENSG00000054392.13	59.9304	2.33871	0.514848	4.54252	5.56e-06	0.000128208	HHAT
ENSG00000161912.18	66.2902	1.97959	0.435887	4.54153	5.58e-06	0.000128628	ADCY10P1
ENSG00000121486.12	514.733	1.21843	0.268328	4.54082	5.6e-06	0.000128882	TRMT1L
ENSG00000171574.18	154.311	-1.28954	0.28404	-4.53997	5.63e-06	0.000129219	ZNF584
ENSG00000174028.6	969.425	1.13979	0.251089	4.53936	5.64e-06	0.000129412	FAM3C2
ENSG00000235904.3	17.5787	6.24194	1.37526	4.53874	5.66e-06	0.000129612	RBMS3-AS3
ENSG00000175175.6	747.587	1.15235	0.25393	4.53808	5.68e-06	0.000129838	PPM1E
ENSG00000163235.16	68.8336	1.98717	0.438065	4.53624	5.73e-06	0.000130789	TGFA
ENSG00000197959.14	1303.71	1.17472	0.259032	4.53503	5.76e-06	0.000131359	DNM3
ENSG00000007968.7	294.283	-1.16283	0.256467	-4.53403	5.79e-06	0.000131801	E2F2
ENSG00000197093.11	632.452	-1.20642	0.266443	-4.52788	5.96e-06	0.000135502	GAL3ST4
ENSG00000100823.12	1396.48	-0.897159	0.198185	-4.52687	5.99e-06	0.000135961	APEX1
ENSG00000001630.17	2095.57	-0.912968	0.201841	-4.52321	6.09e-06	0.000138143	CYP51A1
ENSG00000250510.8	458.263	-1.29163	0.285714	-4.52071	6.16e-06	0.00013942	GPR162
ENSG00000100600.15	997.789	1.12802	0.249524	4.52068	6.16e-06	0.00013942	LGMN
ENSG00000255145.3	29.3001	3.22138	0.712692	4.52001	6.18e-06	0.000139664	STX17-AS1
ENSG00000091409.15	1579.5	0.997399	0.220681	4.51964	6.19e-06	0.000139721	ITGA6
ENSG00000203999.9	56.9196	2.61181	0.57807	4.51816	6.24e-06	0.000140505	LINC01270
ENSG00000051108.15	434.72	-1.33509	0.295687	-4.51522	6.33e-06	0.000142271	HERPUD1
ENSG00000121073.15	497.625	-0.996783	0.220781	-4.51481	6.34e-06	0.000142352	SLC35B1
ENSG00000273382.1	92.4801	1.58391	0.351031	4.51215	6.42e-06	0.000143947	AL356488.3
ENSG00000104886.11	259.628	-1.4017	0.31097	-4.50752	6.56e-06	0.000146926	PLEKHJ1
ENSG00000176749.9	877.139	-1.51815	0.336975	-4.50523	6.63e-06	0.000148316	CDK5R1
ENSG00000163110.15	498.647	1.19694	0.265768	4.50372	6.68e-06	0.000149171	PDLIM5
ENSG00000196787.3	105.359	1.88072	0.418207	4.49711	6.89e-06	0.000153672	HIST1H2AG
ENSG00000089177.18	190.704	1.438	0.319917	4.49492	6.96e-06	0.000155045	KIF16B
ENSG00000145390.11	59.5862	2.88104	0.641078	4.49405	6.99e-06	0.000155473	USP53
ENSG00000240972.2	297.271	-1.34817	0.300097	-4.49246	7.04e-06	0.000156423	MIF
ENSG00000167371.21	326.643	-1.22488	0.272716	-4.49142	7.08e-06	0.000156977	PRRT2
ENSG00000104327.7	16.7884	5.48242	1.22074	4.49107	7.09e-06	0.000157017	CALB1
ENSG00000117748.10	602.27	-1.06961	0.238394	-4.48674	7.23e-06	0.000160029	RPA2
ENSG00000166881.10	768.516	-1.04787	0.233732	-4.48321	7.35e-06	0.000162478	NEMP1
ENSG00000093009.10	287.055	-1.2041	0.268736	-4.48059	7.44e-06	0.000164268	CDC45
ENSG00000268628.2	21.4591	4.07775	0.910396	4.47909	7.5e-06	0.000164757	AL121761.1
ENSG00000287725.1	76.3642	2.52513	0.563733	4.4793	7.49e-06	0.000164757	AP003071.5
ENSG00000159184.7	94.9992	1.87709	0.419041	4.47948	7.48e-06	0.000164757	HOXB13
ENSG00000170634.13	69.377	-1.69436	0.378376	-4.478	7.53e-06	0.000165378	ACYP2
ENSG00000186115.13	16.5579	5.56022	1.24259	4.47471	7.65e-06	0.000167582	CYP4F2
ENSG00000197563.11	347.269	1.32434	0.295968	4.4746	7.66e-06	0.000167582	PIGN
ENSG00000259033.2	15.8552	6.19303	1.38437	4.47353	7.69e-06	0.000168193	AL356804.1
ENSG00000134184.13	442.569	-1.16533	0.260609	-4.47155	7.77e-06	0.000169308	GSTM1
ENSG00000087077.14	365.883	-1.2615	0.282103	-4.47178	7.76e-06	0.000169308	TRIP6
ENSG00000196873.15	420.038	1.37926	0.308498	4.47088	7.79e-06	0.00016961	CBWD3
ENSG00000177103.15	306.435	-1.51892	0.3398	-4.47003	7.82e-06	0.000170058	DSCAML1
ENSG00000272405.1	51.0156	2.81828	0.630691	4.46855	7.88e-06	0.00017101	AL365181.3
ENSG00000204387.14	484.615	-1.20775	0.270527	-4.46444	8.03e-06	0.000174099	SNHG32
ENSG00000117280.13	814.197	0.982854	0.220205	4.46336	8.07e-06	0.000174746	RAB29
ENSG00000169567.12	1364.92	-0.931105	0.208802	-4.45928	8.22e-06	0.000177868	HINT1
ENSG00000103187.8	1465.1	1.15046	0.25811	4.45724	8.3e-06	0.000179329	COTL1
ENSG00000157214.14	17.3681	5.58252	1.25275	4.45621	8.34e-06	0.000179953	STEAP2
ENSG00000140057.9	17.8665	5.49244	1.23285	4.45506	8.39e-06	0.000180446	AK7
ENSG00000183508.5	56.2333	3.75936	0.84379	4.45533	8.38e-06	0.000180446	TENT5C
ENSG00000090097.21	1020.02	-1.23343	0.276886	-4.45465	8.4e-06	0.000180558	PCBP4
ENSG00000173295.7	50.6365	2.14113	0.48127	4.44892	8.63e-06	0.000184951	FAM86B3P
ENSG00000231312.7	118.447	1.50922	0.339212	4.44919	8.62e-06	0.000184951	MAP4K3-DT
ENSG00000126878.13	2509.86	-1.0442	0.234789	-4.4474	8.69e-06	0.000185775	AIF1L
ENSG00000121716.20	1414.79	1.07304	0.241264	4.44759	8.68e-06	0.000185775	PILRB
ENSG00000172671.20	80.7511	1.6628	0.373956	4.44651	8.73e-06	0.000186306	ZFAND4
ENSG00000173207.13	510.844	-1.19647	0.269111	-4.44602	8.75e-06	0.000186486	CKS1B
ENSG00000164647.9	20.5635	4.05499	0.912174	4.44541	8.77e-06	0.000186771	STEAP1
ENSG00000198932.13	254.909	1.55588	0.35006	4.44462	8.8e-06	0.000187021	GPRASP1
ENSG00000134245.18	105.663	1.61063	0.362381	4.44456	8.81e-06	0.000187021	WNT2B
ENSG00000100982.12	241.032	-1.17336	0.264027	-4.44409	8.83e-06	0.000187186	PCIF1
ENSG00000088832.17	2566.3	0.969239	0.218187	4.44223	8.9e-06	0.000188569	FKBP1A
ENSG00000181019.13	1082.16	-1.24089	0.279381	-4.44157	8.93e-06	0.000188661	NQO1
ENSG00000166228.9	104.843	-1.50428	0.33868	-4.4416	8.93e-06	0.000188661	PCBD1
ENSG00000186193.9	497.274	-1.05058	0.236693	-4.4386	9.05e-06	0.000191036	SAPCD2
ENSG00000115129.14	399.64	-1.314	0.296149	-4.43695	9.12e-06	0.000192252	TP53I3
ENSG00000188833.9	19.8875	4.28808	0.966542	4.43652	9.14e-06	0.000192397	ENTPD8
ENSG00000136938.9	575.952	-1.36318	0.307321	-4.43568	9.18e-06	0.000192895	ANP32B
ENSG00000135094.11	17.9153	5.569	1.25798	4.42692	9.56e-06	0.000200635	SDS
ENSG00000215492.6	697.529	-0.9997	0.225936	-4.4247	9.66e-06	0.00020245	HNRNPA1P7
ENSG00000104738.18	1426.6	-1.37904	0.31169	-4.42441	9.67e-06	0.000202464	MCM4
ENSG00000137364.5	497.645	1.3765	0.311203	4.42316	9.73e-06	0.000203376	TPMT
ENSG00000102316.17	1425.91	-0.992554	0.224423	-4.42269	9.75e-06	0.000203557	MAGED2
ENSG00000154175.17	18.892	4.64449	1.05045	4.42145	9.8e-06	0.000204474	ABI3BP
ENSG00000147403.16	3147.82	-1.03746	0.234657	-4.42117	9.82e-06	0.000204474	RPL10
ENSG00000111850.11	70.9922	1.87081	0.423258	4.42003	9.87e-06	0.000205294	SMIM8
ENSG00000134716.11	114.124	1.42398	0.322211	4.41938	9.9e-06	0.000205649	CYP2J2
ENSG00000246263.3	38.5784	2.35838	0.533703	4.4189	9.92e-06	0.000205845	UBR5-AS1
ENSG00000178522.14	36.657	2.91968	0.660812	4.41831	9.95e-06	0.000206143	AMBN
ENSG00000198734.11	14.0716	6.30508	1.42728	4.41757	9.98e-06	0.000206595	F5
ENSG00000129562.11	1201.84	0.940767	0.21303	4.41612	1e-05	0.000207719	DAD1
ENSG00000164128.7	34.2661	2.51576	0.569845	4.41482	1.01e-05	0.000208708	NPY1R
ENSG00000226476.5	39.9255	-2.40429	0.544707	-4.41391	1.02e-05	0.00020932	LINC01748
ENSG00000084234.17	9418.65	0.86996	0.197151	4.41266	1.02e-05	0.000210265	APLP2
ENSG00000105401.9	1524.21	1.11021	0.251852	4.40819	1.04e-05	0.000214172	CDC37
ENSG00000087510.7	108.762	1.62217	0.367995	4.40813	1.04e-05	0.000214172	TFAP2C
ENSG00000122870.12	17.922	4.24176	0.962546	4.40681	1.05e-05	0.000215207	BICC1
ENSG00000158555.15	62.2825	2.75329	0.625357	4.40274	1.07e-05	0.000219014	GDPD5
ENSG00000105926.15	917.162	1.08694	0.247049	4.39969	1.08e-05	0.000221836	MPP6
ENSG00000204282.4	17.8967	5.09194	1.15764	4.39857	1.09e-05	0.00022271	TNRC6C-AS1
ENSG00000175189.4	21.3153	3.1799	0.723041	4.39796	1.09e-05	0.000223056	INHBC
ENSG00000073464.12	709.146	1.22119	0.277908	4.39421	1.11e-05	0.000226372	CLCN4
ENSG00000145331.14	112.84	1.70527	0.388058	4.39435	1.11e-05	0.000226372	TRMT10A
ENSG00000168386.18	90.2511	1.74516	0.397188	4.39378	1.11e-05	0.000226541	FILIP1L
ENSG00000174206.12	117.393	1.46353	0.333219	4.39208	1.12e-05	0.000227746	C12orf66
ENSG00000102265.12	1143.7	1.19496	0.272066	4.39216	1.12e-05	0.000227746	TIMP1
ENSG00000068079.7	89.9682	-1.58954	0.362061	-4.39024	1.13e-05	0.000229406	IFI35
ENSG00000137267.6	1766.59	-1.17528	0.267908	-4.38687	1.15e-05	0.000232692	TUBB2A
ENSG00000185070.11	200.175	1.85637	0.423316	4.38531	1.16e-05	0.000233875	FLRT2
ENSG00000185189.18	529.599	-0.944085	0.215289	-4.3852	1.16e-05	0.000233875	NRBP2
ENSG00000197969.14	656.484	1.70857	0.389644	4.38496	1.16e-05	0.000233875	VPS13A
ENSG00000064651.14	546.12	1.05483	0.240644	4.38334	1.17e-05	0.00023533	SLC12A2
ENSG00000175130.7	4415.37	-1.10666	0.252539	-4.38215	1.18e-05	0.00023633	MARCKSL1
ENSG00000196277.16	28.4308	4.07402	0.92975	4.38184	1.18e-05	0.000236377	GRM7
ENSG00000146038.12	31.2144	3.07973	0.702923	4.38132	1.18e-05	0.000236645	DCDC2
ENSG00000272274.2	12.5084	6.96565	1.59036	4.37993	1.19e-05	0.000237877	LINC00551
ENSG00000114757.19	17.9565	4.59924	1.05024	4.37922	1.19e-05	0.000238351	PEX5L
ENSG00000187902.11	42.6481	2.4975	0.570509	4.37766	1.2e-05	0.000239772	SHISA7
ENSG00000115112.8	10.6813	6.75568	1.54353	4.37677	1.2e-05	0.000240462	TFCP2L1
ENSG00000189057.11	417.362	-1.00957	0.230737	-4.37539	1.21e-05	0.000241695	FAM111B
ENSG00000262155.2	57.8038	2.10686	0.481653	4.37422	1.22e-05	0.000242692	LINC02175
ENSG00000204044.6	14.6096	4.63298	1.05934	4.37345	1.22e-05	0.00024326	SLC12A5-AS1
ENSG00000137142.5	1598.04	-1.45241	0.332194	-4.37219	1.23e-05	0.000244371	IGFBPL1
ENSG00000247934.4	39.9228	2.26426	0.51793	4.37175	1.23e-05	0.000244561	AC022364.1
ENSG00000120279.6	11.0255	6.80484	1.55701	4.37045	1.24e-05	0.000245727	MYCT1
ENSG00000273456.1	36.0903	2.68694	0.615173	4.36779	1.26e-05	0.000248436	AC064836.3
ENSG00000161638.11	246.493	1.8826	0.431179	4.36618	1.26e-05	0.000249685	ITGA5
ENSG00000162521.19	2338.05	-0.947359	0.216977	-4.36616	1.26e-05	0.000249685	RBBP4
ENSG00000116675.16	257.169	1.102	0.252435	4.36549	1.27e-05	0.000250151	DNAJC6
ENSG00000105048.17	42.5721	3.04251	0.697001	4.36515	1.27e-05	0.000250241	TNNT1
ENSG00000182220.15	2255.18	0.969989	0.222409	4.36128	1.29e-05	0.000254402	ATP6AP2
ENSG00000257056.3	26.2978	3.5595	0.816467	4.35964	1.3e-05	0.000256002	LINC02282
ENSG00000128052.10	10.0458	6.66395	1.52897	4.35845	1.31e-05	0.000256782	KDR
ENSG00000177570.14	38.2697	2.87776	0.660259	4.35853	1.31e-05	0.000256782	SAMD12
ENSG00000136999.5	74.1495	1.70611	0.391909	4.35334	1.34e-05	0.00026253	CCN3
ENSG00000079101.16	12.2864	6.24175	1.43393	4.35291	1.34e-05	0.000262639	CLUL1
ENSG00000144959.10	275.233	2.00401	0.460405	4.35273	1.34e-05	0.000262639	NCEH1
ENSG00000125844.16	1165.46	0.999613	0.229671	4.35238	1.35e-05	0.000262744	RRBP1
ENSG00000115380.20	35.8892	2.79298	0.642028	4.35025	1.36e-05	0.000264673	EFEMP1
ENSG00000041353.10	87.3107	1.85624	0.426694	4.35028	1.36e-05	0.000264673	RAB27B
ENSG00000225790.2	13.186	7.04707	1.62055	4.34855	1.37e-05	0.000266408	AC007953.1
ENSG00000136699.19	536.872	-0.916114	0.210803	-4.34584	1.39e-05	0.000269405	SMPD4
ENSG00000198933.9	125.083	-1.66671	0.383792	-4.34275	1.41e-05	0.000272902	TBKBP1
ENSG00000089723.10	59.7812	2.001	0.460919	4.34133	1.42e-05	0.00027434	OTUB2
ENSG00000173376.14	18.328	3.55999	0.820509	4.33876	1.43e-05	0.000277243	NDNF
ENSG00000005249.13	428.079	1.19955	0.276705	4.33511	1.46e-05	0.000281548	PRKAR2B
ENSG00000100842.13	466.91	-1.87099	0.431899	-4.33201	1.48e-05	0.000285198	EFS
ENSG00000077274.9	82.0192	1.80417	0.416637	4.33032	1.49e-05	0.000287066	CAPN6
ENSG00000176170.13	140.215	-1.44455	0.333694	-4.32895	1.5e-05	0.000288517	SPHK1
ENSG00000198728.10	311.996	-1.22242	0.282486	-4.32737	1.51e-05	0.000290253	LDB1
ENSG00000133101.10	52.6112	2.17088	0.502322	4.32168	1.55e-05	0.000297481	CCNA1
ENSG00000276509.1	98.0938	2.17474	0.503326	4.32073	1.56e-05	0.000298071	AC239799.1
ENSG00000159593.15	744.276	-0.929948	0.215227	-4.32077	1.55e-05	0.000298071	NAE1
ENSG00000253669.4	52.6815	2.40457	0.556652	4.31971	1.56e-05	0.000299098	GASAL1
ENSG00000272752.6	763.729	1.26333	0.292611	4.31742	1.58e-05	0.000301868	STAG3L5P-PVRIG2P-PILRB
ENSG00000214391.3	31.5958	-2.48466	0.575562	-4.31693	1.58e-05	0.000302177	TUBAP2
ENSG00000196092.14	24.0149	3.70322	0.8584	4.3141	1.6e-05	0.000305721	PAX5
ENSG00000211448.12	280.283	2.30656	0.534841	4.31261	1.61e-05	0.000307071	DIO2
ENSG00000049540.17	340.977	-1.26772	0.29395	-4.31271	1.61e-05	0.000307071	ELN
ENSG00000125319.14	61.157	-2.33005	0.540386	-4.31183	1.62e-05	0.000307797	C17orf53
ENSG00000287097.1	15.3622	5.44237	1.26366	4.30684	1.66e-05	0.000314092	AL590550.1
ENSG00000129255.16	548.532	-1.54038	0.35765	-4.30695	1.66e-05	0.000314092	MPDU1
ENSG00000110811.20	128.76	-1.38069	0.32066	-4.30578	1.66e-05	0.000315224	P3H3
ENSG00000132793.11	16.3535	4.3776	1.01738	4.30281	1.69e-05	0.000319123	LPIN3
ENSG00000171303.7	157.976	1.44737	0.336535	4.30079	1.7e-05	0.000321495	KCNK3
ENSG00000170743.17	15.9052	4.28676	0.996769	4.30065	1.7e-05	0.000321495	SYT9
ENSG00000186174.12	511.326	-1.0445	0.242965	-4.29898	1.72e-05	0.000323187	BCL9L
ENSG00000178467.18	294.517	-1.08881	0.253265	-4.29911	1.71e-05	0.000323187	P4HTM
ENSG00000139971.15	518.116	1.17859	0.274263	4.29731	1.73e-05	0.000325246	ARMH4
ENSG00000143869.7	14.8294	4.7389	1.10286	4.29694	1.73e-05	0.000325425	GDF7
ENSG00000196361.10	824.059	-1.2205	0.284128	-4.29559	1.74e-05	0.000327035	ELAVL3
ENSG00000184900.15	664.317	-1.07678	0.250724	-4.29468	1.75e-05	0.000327993	SUMO3
ENSG00000171714.11	78.3452	1.83622	0.427676	4.29348	1.76e-05	0.000329403	ANO5
ENSG00000156136.10	333.725	-0.996221	0.232056	-4.29302	1.76e-05	0.000329707	DCK
ENSG00000135127.11	155.136	1.35368	0.315447	4.2913	1.78e-05	0.000331884	BICDL1
ENSG00000008300.17	735.941	-1.07204	0.250037	-4.28751	1.81e-05	0.000337035	CELSR3
ENSG00000246705.4	111.394	1.75343	0.408975	4.28737	1.81e-05	0.000337035	H2AFJ
ENSG00000269416.6	156.023	-1.81794	0.424072	-4.28686	1.81e-05	0.000337431	LINC01224
ENSG00000157227.13	949.249	-1.25448	0.292753	-4.28512	1.83e-05	0.000339691	MMP14
ENSG00000166900.17	191.817	1.57227	0.367653	4.2765	1.9e-05	0.000352704	STX3
ENSG00000130477.15	771.725	1.12767	0.263718	4.27603	1.9e-05	0.000353048	UNC13A
ENSG00000177731.16	794.188	-1.0359	0.242387	-4.27374	1.92e-05	0.000356298	FLII
ENSG00000100604.13	102.72	1.67278	0.391855	4.26887	1.96e-05	0.000363755	CHGA
ENSG00000272008.1	29.9003	3.00655	0.705032	4.26441	2e-05	0.000370665	AL139274.2
ENSG00000117450.14	3919.71	1.05396	0.247188	4.26382	2.01e-05	0.000371241	PRDX1
ENSG00000247137.9	55.2413	2.1218	0.49767	4.26347	2.01e-05	0.000371399	AP000873.2
ENSG00000105409.19	1052.11	1.21789	0.285725	4.26246	2.02e-05	0.000372235	ATP1A3
ENSG00000198162.12	1491.93	0.8431	0.197786	4.2627	2.02e-05	0.000372235	MAN1A2
ENSG00000186314.11	20.4834	3.79456	0.890704	4.26019	2.04e-05	0.000375622	PRELID2
ENSG00000288045.1	43.8284	2.84789	0.668609	4.25943	2.05e-05	0.000376477	AL352979.4
ENSG00000111206.12	1559.34	-1.30725	0.306961	-4.25868	2.06e-05	0.000377309	FOXM1
ENSG00000087266.17	510.416	-1.09174	0.256474	-4.25671	2.07e-05	0.000380215	SH3BP2
ENSG00000275198.1	55.0841	2.38119	0.559501	4.25591	2.08e-05	0.000381158	AL512791.2
ENSG00000232448.2	16.4538	4.87515	1.14656	4.25199	2.12e-05	0.000387462	AL354824.2
ENSG00000119013.9	553.997	0.951469	0.223796	4.2515	2.12e-05	0.000387864	NDUFB3
ENSG00000231233.1	12.8965	6.06692	1.42734	4.25051	2.13e-05	0.000388775	CFAP58-DT
ENSG00000162636.16	824.916	0.965536	0.227159	4.25048	2.13e-05	0.000388775	FAM102B
ENSG00000287576.1	38.5163	2.15003	0.505979	4.24925	2.14e-05	0.000390476	AC067930.8
ENSG00000105137.13	147.396	-1.54865	0.364482	-4.24891	2.15e-05	0.000390635	SYDE1
ENSG00000160471.13	22.1832	5.26179	1.23869	4.24786	2.16e-05	0.000392031	COX6B2
ENSG00000221990.4	97.5108	1.43676	0.338353	4.24633	2.17e-05	0.000393841	EXOC3-AS1
ENSG00000256073.3	125.04	1.39426	0.328331	4.2465	2.17e-05	0.000393841	URB1-AS1
ENSG00000140287.11	16.9911	3.97076	0.935982	4.24235	2.21e-05	0.000400451	HDC
ENSG00000230303.6	12.7555	4.8683	1.14773	4.24169	2.22e-05	0.000400743	AL353743.2
ENSG00000169231.13	439.446	-1.03749	0.244581	-4.24192	2.22e-05	0.000400743	THBS3
ENSG00000110057.8	44.766	2.26172	0.533291	4.24106	2.22e-05	0.000401419	UNC93B1
ENSG00000109854.13	17.6854	3.81949	0.901719	4.23579	2.28e-05	0.000410057	HTATIP2
ENSG00000126088.14	499.265	-0.980485	0.231469	-4.23592	2.28e-05	0.000410057	UROD
ENSG00000185236.12	269.935	-1.32105	0.312118	-4.23253	2.31e-05	0.000415588	RAB11B
ENSG00000085117.12	196.446	1.71545	0.405459	4.23089	2.33e-05	0.000418098	CD82
ENSG00000164733.21	2872.91	0.882438	0.208581	4.23068	2.33e-05	0.000418098	CTSB
ENSG00000176907.5	415.03	1.40692	0.33261	4.22995	2.34e-05	0.00041876	TCIM
ENSG00000197162.10	155.158	-1.5325	0.362309	-4.22983	2.34e-05	0.00041876	ZNF785
ENSG00000250634.6	36.5108	3.26	0.770895	4.22885	2.35e-05	0.000420122	LINC01182
ENSG00000229320.3	128.942	1.2747	0.301624	4.22614	2.38e-05	0.000424749	KRT8P12
ENSG00000146592.17	760.403	1.2644	0.299355	4.22374	2.4e-05	0.000428825	CREB5
ENSG00000170275.14	920.793	-0.94643	0.224114	-4.22298	2.41e-05	0.000429808	CRTAP
ENSG00000286535.1	33.0252	2.47992	0.587505	4.22111	2.43e-05	0.000432922	AC139019.1
ENSG00000147459.18	16.045	4.95325	1.17392	4.21943	2.45e-05	0.000435211	DOCK5
ENSG00000080824.18	24741.6	0.801577	0.189966	4.21958	2.45e-05	0.000435211	HSP90AA1
ENSG00000197872.11	754.909	1.19857	0.284207	4.21724	2.47e-05	0.000438983	FAM49A
ENSG00000198286.9	29.3919	4.99084	1.18369	4.21636	2.48e-05	0.000440221	CARD11
ENSG00000110455.14	50.257	2.11581	0.502535	4.21027	2.55e-05	0.000451754	ACCS
ENSG00000164690.8	13.4213	6.11187	1.45179	4.2099	2.55e-05	0.000452008	SHH
ENSG00000205791.3	59.0606	1.82072	0.432749	4.20734	2.58e-05	0.000456659	LOH12CR2
ENSG00000198695.2	941.144	1.42587	0.339061	4.20535	2.61e-05	0.000460196	MT-ND6
ENSG00000135116.9	82.6084	2.01327	0.479075	4.2024	2.64e-05	0.000465743	HRK
ENSG00000049323.16	343.404	1.33666	0.31838	4.19831	2.69e-05	0.000473723	LTBP1
ENSG00000198945.7	115.367	1.54402	0.367805	4.19792	2.69e-05	0.000474032	L3MBTL3
ENSG00000108389.9	752.571	-0.938149	0.223503	-4.19749	2.7e-05	0.000474419	MTMR4
ENSG00000064687.12	367.744	1.27574	0.304069	4.19557	2.72e-05	0.000477945	ABCA7
ENSG00000128274.17	15.1745	5.47422	1.30486	4.19525	2.73e-05	0.000478096	A4GALT
ENSG00000233922.3	18.7757	5.23402	1.24842	4.19251	2.76e-05	0.000483398	LINC01694
ENSG00000248905.9	19.896	4.21803	1.00693	4.189	2.8e-05	0.000489878	FMN1
ENSG00000152240.13	152.801	-1.2144	0.289885	-4.18924	2.8e-05	0.000489878	HAUS1
ENSG00000113790.11	210.228	1.32108	0.315483	4.18747	2.82e-05	0.000492665	EHHADH
ENSG00000078053.17	137.957	1.3231	0.316221	4.18409	2.86e-05	0.00049847	AMPH
ENSG00000164776.9	93.1875	-1.46624	0.350433	-4.18408	2.86e-05	0.00049847	PHKG1
ENSG00000196972.9	37.8725	3.08685	0.737755	4.18411	2.86e-05	0.00049847	SMIM10L2B
ENSG00000096433.11	120.032	1.51801	0.362906	4.18294	2.88e-05	0.000500448	ITPR3
ENSG00000233237.8	179.68	1.42545	0.340846	4.18209	2.89e-05	0.000501794	LINC00472
ENSG00000067141.17	1000.63	1.05978	0.253445	4.18147	2.9e-05	0.000502613	NEO1
ENSG00000068028.17	208.043	-1.28369	0.307144	-4.17945	2.92e-05	0.000506565	RASSF1
ENSG00000153208.17	119.409	1.67765	0.401501	4.17844	2.94e-05	0.000508274	MERTK
ENSG00000175426.11	30.6748	2.68295	0.64226	4.17736	2.95e-05	0.000510155	PCSK1
ENSG00000157680.15	745.365	1.06988	0.256188	4.17616	2.96e-05	0.000512309	DGKI
ENSG00000157625.15	478.215	0.956707	0.229133	4.17534	2.98e-05	0.000513612	TAB3
ENSG00000197451.12	1440.38	-0.917367	0.219766	-4.1743	2.99e-05	0.000515432	HNRNPAB
ENSG00000164308.16	466.183	-1.29722	0.310908	-4.17237	3.01e-05	0.00051927	ERAP2
ENSG00000169564.7	1247.18	-0.980413	0.234999	-4.17199	3.02e-05	0.000519589	PCBP1
ENSG00000100162.15	92.6774	-1.67069	0.400566	-4.17082	3.04e-05	0.00052172	CENPM
ENSG00000172572.6	41.3724	2.33359	0.55955	4.17048	3.04e-05	0.000521938	PDE3A
ENSG00000180537.13	189.442	1.24707	0.299049	4.17013	3.04e-05	0.000522199	RNF182
ENSG00000269954.2	12.1285	5.49765	1.31848	4.1697	3.05e-05	0.00052264	AC022239.1
ENSG00000268218.1	15.2757	4.01065	0.962026	4.16896	3.06e-05	0.000523774	AC137932.3
ENSG00000285600.1	16.4663	3.86414	0.927289	4.16714	3.08e-05	0.000527425	AC023593.1
ENSG00000188522.15	23.2256	3.35724	0.806378	4.16336	3.14e-05	0.000535681	FAM83G
ENSG00000171860.5	16.3163	3.80185	0.913548	4.16163	3.16e-05	0.000539189	C3AR1
ENSG00000133247.14	91.3772	-1.58042	0.379855	-4.16058	3.17e-05	0.000541101	KMT5C
ENSG00000104129.10	90.2973	-1.78141	0.428284	-4.1594	3.19e-05	0.000543336	DNAJC17
ENSG00000120885.22	35770.7	0.898939	0.216155	4.15877	3.2e-05	0.000544286	CLU
ENSG00000255521.2	41.1499	2.69385	0.647878	4.15797	3.21e-05	0.000545621	AL356215.1
ENSG00000111799.21	48.0907	3.51236	0.844902	4.15712	3.22e-05	0.000547073	COL12A1
ENSG00000166446.15	16.6818	3.89776	0.93806	4.15513	3.25e-05	0.000551287	CDYL2
ENSG00000196872.12	33.4473	2.59604	0.624848	4.15468	3.26e-05	0.000551814	KIAA1211L
ENSG00000135333.14	24.3082	2.94459	0.709251	4.15169	3.3e-05	0.000557909	EPHA7
ENSG00000014138.9	256.241	-1.14535	0.275873	-4.15174	3.3e-05	0.000557909	POLA2
ENSG00000205763.13	137.512	-1.43807	0.346404	-4.15144	3.3e-05	0.000557942	RP9P
ENSG00000161091.13	426.178	1.59868	0.385272	4.14949	3.33e-05	0.000562122	MFSD12
ENSG00000100427.15	3711.37	-1.06156	0.255903	-4.14828	3.35e-05	0.000563944	MLC1
ENSG00000127328.21	864.55	0.922113	0.222276	4.1485	3.35e-05	0.000563944	RAB3IP
ENSG00000066583.12	169.949	1.21713	0.293426	4.14799	3.35e-05	0.000564083	ISOC1
ENSG00000128294.16	117.17	1.61935	0.39056	4.14623	3.38e-05	0.000567852	TPST2
ENSG00000275023.5	696.016	-1.00412	0.242241	-4.14512	3.4e-05	0.000570017	MLLT6
ENSG00000130176.8	20.3012	3.74647	0.904218	4.14333	3.42e-05	0.000573902	CNN1
ENSG00000115266.11	1121.96	-0.887345	0.214231	-4.142	3.44e-05	0.000576642	APC2
ENSG00000189143.9	10.8911	6.76049	1.63248	4.14124	3.45e-05	0.00057796	CLDN4
ENSG00000235180.1	24.2786	3.75292	0.906746	4.13889	3.49e-05	0.000583321	LINC00601
ENSG00000164659.15	157.157	1.41282	0.34146	4.13758	3.51e-05	0.000586003	KIAA1324L
ENSG00000224596.8	15.6711	3.63214	0.877887	4.13737	3.51e-05	0.000586003	ZMIZ1-AS1
ENSG00000101384.12	1452.15	0.906216	0.219054	4.13696	3.52e-05	0.000586443	JAG1
ENSG00000112715.22	3287.62	-1.75227	0.423841	-4.13426	3.56e-05	0.00059277	VEGFA
ENSG00000183914.14	28.5481	2.69924	0.653253	4.132	3.6e-05	0.000598016	DNAH2
ENSG00000151615.3	12.5192	6.03477	1.46058	4.13176	3.6e-05	0.000598041	POU4F2
ENSG00000104213.12	42.5838	2.24066	0.542464	4.13051	3.62e-05	0.000600687	PDGFRL
ENSG00000227630.4	19.7581	5.18188	1.25511	4.12863	3.65e-05	0.000605002	LINC01132
ENSG00000157653.11	23.5327	3.21124	0.778086	4.1271	3.67e-05	0.000607808	C9orf43
ENSG00000100804.19	1049.89	-0.981198	0.237741	-4.12716	3.67e-05	0.000607808	PSMB5
ENSG00000255642.1	18.1962	3.35675	0.813464	4.12648	3.68e-05	0.000608823	PABPC1P4
ENSG00000231770.6	231.19	1.34597	0.326479	4.12268	3.74e-05	0.000618036	TMEM44-AS1
ENSG00000236609.4	459.363	-0.92975	0.225527	-4.12256	3.75e-05	0.000618036	ZNF853
ENSG00000150394.14	57.5455	3.018	0.73235	4.12098	3.77e-05	0.000621537	CDH8
ENSG00000084444.14	733.819	1.01023	0.245154	4.1208	3.78e-05	0.000621537	FAM234B
ENSG00000055147.19	399.422	1.01204	0.245724	4.11858	3.81e-05	0.000626899	FAM114A2
ENSG00000204580.13	4362.54	-0.998645	0.242534	-4.11755	3.83e-05	0.000629098	DDR1
ENSG00000089685.15	1221.67	-1.31007	0.318295	-4.1159	3.86e-05	0.000632978	BIRC5
ENSG00000170500.12	2959.5	1.73122	0.420683	4.11527	3.87e-05	0.000634069	LONRF2
ENSG00000139318.8	431.258	1.83308	0.445565	4.11406	3.89e-05	0.000636761	DUSP6
ENSG00000178033.6	16.2044	4.52639	1.10044	4.11325	3.9e-05	0.000638363	CALHM5
ENSG00000129667.12	20.5013	4.17142	1.01429	4.11264	3.91e-05	0.000639413	RHBDF2
ENSG00000135862.6	2863.18	1.12113	0.272846	4.10903	3.97e-05	0.000648827	LAMC1
ENSG00000205562.3	15.0345	4.85481	1.18235	4.10606	4.02e-05	0.000656576	AL049775.1
ENSG00000138028.16	56.3347	1.67586	0.40835	4.10399	4.06e-05	0.000661165	CGREF1
ENSG00000112378.12	36.8365	2.64366	0.644158	4.10406	4.06e-05	0.000661165	PERP
ENSG00000214194.9	610.318	0.97642	0.237963	4.10324	4.07e-05	0.000662646	SMIM30
ENSG00000118689.15	1270.72	-0.799799	0.194963	-4.1023	4.09e-05	0.000664667	FOXO3
ENSG00000103544.15	423.161	-1.05836	0.258033	-4.10167	4.1e-05	0.000665837	VPS35L
ENSG00000133169.6	368.558	1.44683	0.353078	4.09776	4.17e-05	0.000676501	BEX1
ENSG00000258311.5	234.873	1.95219	0.476646	4.09568	4.21e-05	0.000681919	AC009779.3
ENSG00000075399.14	210.854	-1.48212	0.361963	-4.09466	4.23e-05	0.000684253	VPS9D1
ENSG00000172164.15	201.549	-1.52618	0.372895	-4.09278	4.26e-05	0.000689147	SNTB1
ENSG00000156042.18	34.1415	2.64691	0.646822	4.09218	4.27e-05	0.000689686	CFAP70
ENSG00000104888.10	210.092	1.5908	0.388746	4.09214	4.27e-05	0.000689686	SLC17A7
ENSG00000196090.12	181.794	1.39121	0.340176	4.08967	4.32e-05	0.000696378	PTPRT
ENSG00000287439.1	19.1689	3.62304	0.885976	4.08932	4.33e-05	0.000696759	AC092078.3
ENSG00000277287.1	17.6482	3.30675	0.809008	4.08742	4.36e-05	0.000701787	AL109976.1
ENSG00000159147.18	301.067	-1.39215	0.340737	-4.0857	4.39e-05	0.000705851	DONSON
ENSG00000135750.15	16.7081	3.54774	0.868347	4.08562	4.4e-05	0.000705851	KCNK1
ENSG00000134817.10	36.3993	2.28373	0.559291	4.08326	4.44e-05	0.000712366	APLNR
ENSG00000109861.16	406.908	1.2672	0.31041	4.08233	4.46e-05	0.000712438	CTSC
ENSG00000177990.12	56.1766	1.86499	0.45679	4.08282	4.45e-05	0.000712438	DPY19L2
ENSG00000232160.7	61.6103	1.67914	0.411283	4.08268	4.45e-05	0.000712438	RAP2C-AS1
ENSG00000188064.10	18.1123	3.60693	0.883547	4.08233	4.46e-05	0.000712438	WNT7B
ENSG00000168481.9	124.882	1.87521	0.459445	4.08147	4.48e-05	0.000714357	LGI3
ENSG00000143473.13	29.1479	3.36281	0.824194	4.08012	4.5e-05	0.00071781	KCNH1
ENSG00000226237.2	20.8498	3.35696	0.822932	4.07927	4.52e-05	0.000719737	GAS1RR
ENSG00000103260.9	742.456	-1.25628	0.308057	-4.07807	4.54e-05	0.000722773	METRN
ENSG00000286619.1	122.81	1.4954	0.366878	4.07601	4.58e-05	0.000727286	AC119673.2
ENSG00000170776.21	852.088	1.19547	0.293273	4.0763	4.58e-05	0.000727286	AKAP13
ENSG00000120337.8	25.5493	3.35178	0.822332	4.07594	4.58e-05	0.000727286	TNFSF18
ENSG00000143891.17	94.8333	1.66976	0.409706	4.07551	4.59e-05	0.00072792	GALM
ENSG00000182872.16	527.677	-0.939301	0.230691	-4.07168	4.67e-05	0.000739291	RBM10
ENSG00000118402.6	41.0781	2.34987	0.577243	4.07085	4.68e-05	0.00074121	ELOVL4
ENSG00000040633.13	396.524	-0.941769	0.231361	-4.07056	4.69e-05	0.000741404	PHF23
ENSG00000142686.8	507.774	-0.933084	0.229339	-4.06858	4.73e-05	0.000747033	C1orf216
ENSG00000182979.18	477.552	-1.08347	0.266374	-4.06746	4.75e-05	0.000749906	MTA1
ENSG00000070756.16	2898.24	0.903628	0.222316	4.06461	4.81e-05	0.000758384	PABPC1
ENSG00000081721.12	390.57	-1.005	0.247523	-4.06024	4.9e-05	0.000771961	DUSP12
ENSG00000006283.18	223.853	1.20306	0.29633	4.05987	4.91e-05	0.000772452	CACNA1G
ENSG00000198954.8	318.496	-0.996222	0.24541	-4.05942	4.92e-05	0.000772976	KIF1BP
ENSG00000247556.6	963.207	-1.02639	0.252851	-4.05926	4.92e-05	0.000772976	OIP5-AS1
ENSG00000226445.2	23.4689	3.2055	0.790462	4.05522	5.01e-05	0.000785621	BX322234.1
ENSG00000186451.2	15.2148	5.32901	1.31418	4.05502	5.01e-05	0.000785621	SPATA12
ENSG00000148297.16	381.43	-1.10189	0.271749	-4.05479	5.02e-05	0.000785635	MED22
ENSG00000158769.18	215.022	1.27882	0.315548	4.05269	5.06e-05	0.000791224	F11R
ENSG00000158863.22	504.382	-1.24987	0.308396	-4.05281	5.06e-05	0.000791224	FAM160B2
ENSG00000147854.17	413.151	-1.00244	0.247417	-4.05162	5.09e-05	0.000794078	UHRF2
ENSG00000143614.10	995.383	-0.812861	0.200653	-4.05108	5.1e-05	0.000795147	GATAD2B
ENSG00000131019.11	182.648	1.74263	0.430428	4.0486	5.15e-05	0.000802849	ULBP3
ENSG00000197381.16	241.947	1.32476	0.32735	4.04694	5.19e-05	0.000807815	ADARB1
ENSG00000112149.10	204.891	1.68241	0.416001	4.04425	5.25e-05	0.000816374	CD83
ENSG00000261693.1	22.3126	3.03462	0.750726	4.04225	5.29e-05	0.000822565	AC134682.1
ENSG00000089006.16	1112.24	-0.834698	0.206773	-4.03678	5.42e-05	0.000841182	SNX5
ENSG00000011332.19	279.3	-1.19195	0.295596	-4.03236	5.52e-05	0.000856359	DPF1
ENSG00000145604.16	304.106	-0.965184	0.23939	-4.03185	5.53e-05	0.000857412	SKP2
ENSG00000198668.12	6486.13	0.813423	0.2018	4.03085	5.56e-05	0.000860249	CALM1
ENSG00000104964.14	1489.35	-1.25247	0.310768	-4.03024	5.57e-05	0.000861655	TLE5
ENSG00000103742.12	508.026	-1.35856	0.33712	-4.02991	5.58e-05	0.00086206	IGDCC4
ENSG00000136111.14	33.3036	2.93362	0.728035	4.0295	5.59e-05	0.000862728	TBC1D4
ENSG00000165349.12	14.1751	4.20815	1.04458	4.02857	5.61e-05	0.000865341	SLC7A3
ENSG00000197157.11	2175.81	1.13092	0.28086	4.02664	5.66e-05	0.000871664	SND1
ENSG00000215915.10	14.2353	3.87426	0.962465	4.02535	5.69e-05	0.000875607	ATAD3C
ENSG00000131171.13	1193.16	-0.923577	0.229483	-4.02461	5.71e-05	0.00087756	SH3BGRL
ENSG00000171885.16	4515.54	-1.65033	0.410183	-4.0234	5.74e-05	0.000880937	AQP4
ENSG00000117676.14	101.951	2.03969	0.506976	4.02324	5.74e-05	0.000880937	RPS6KA1
ENSG00000156931.15	1278.46	0.956187	0.237678	4.02304	5.75e-05	0.000880937	VPS8
ENSG00000127589.4	46.5228	-2.17122	0.539877	-4.02169	5.78e-05	0.000885145	TUBBP1
ENSG00000272121.1	38.0417	2.21849	0.551816	4.02035	5.81e-05	0.000887735	AC006058.3
ENSG00000188910.8	14.2578	6.1913	1.53999	4.02034	5.81e-05	0.000887735	GJB3
ENSG00000196569.12	49.4007	3.75876	0.93488	4.02058	5.81e-05	0.000887735	LAMA2
ENSG00000143036.17	99.2181	1.47198	0.366227	4.01932	5.84e-05	0.000890773	SLC44A3
ENSG00000279602.1	49.9466	2.10131	0.52295	4.01818	5.86e-05	0.000894251	AC109326.1
ENSG00000105427.10	13.1481	4.70982	1.17222	4.01786	5.87e-05	0.00089463	CNFN
ENSG00000183856.11	863.592	-1.22449	0.304805	-4.01729	5.89e-05	0.000895952	IQGAP3
ENSG00000272994.1	140.568	1.31479	0.327347	4.01652	5.91e-05	0.000897434	AC012360.3
ENSG00000164291.17	182.407	1.32516	0.329931	4.01646	5.91e-05	0.000897434	ARSK
ENSG00000229191.1	42.3108	2.56949	0.639831	4.01589	5.92e-05	0.00089878	AL358473.1
ENSG00000164663.14	409.008	-1.02391	0.255041	-4.01467	5.95e-05	0.000902589	USP49
ENSG00000162368.13	987.524	-1.03939	0.259109	-4.01141	6.04e-05	0.000914328	CMPK1
ENSG00000089094.19	438.808	-1.12909	0.281619	-4.00927	6.09e-05	0.000921789	KDM2B
ENSG00000151468.11	237.727	1.26795	0.31629	4.00881	6.1e-05	0.000922718	CCDC3
ENSG00000175305.17	252.061	-1.12584	0.280884	-4.00821	6.12e-05	0.000924216	CCNE2
ENSG00000113558.18	4040.65	0.869741	0.217046	4.00717	6.15e-05	0.000926587	SKP1
ENSG00000079215.14	3885.39	-1.47494	0.36806	-4.00732	6.14e-05	0.000926587	SLC1A3
ENSG00000187837.3	267.166	1.28685	0.321182	4.00661	6.16e-05	0.00092794	HIST1H1C
ENSG00000182492.16	273.319	-0.980383	0.24477	-4.00533	6.19e-05	0.000932106	BGN
ENSG00000075218.19	414.642	-1.15371	0.288094	-4.00464	6.21e-05	0.000933982	GTSE1
ENSG00000272556.2	99.5402	1.41252	0.352768	4.00412	6.22e-05	0.000934301	GTF2IP13
ENSG00000111540.16	1792.77	-0.761533	0.190178	-4.00431	6.22e-05	0.000934301	RAB5B
ENSG00000205363.5	560.563	-1.42837	0.356772	-4.0036	6.24e-05	0.000935511	INSYN1
ENSG00000143222.12	614.979	-1.33675	0.33393	-4.00308	6.25e-05	0.000936716	UFC1
ENSG00000196547.15	1526.01	-1.04835	0.261917	-4.00261	6.26e-05	0.000936832	MAN2A2
ENSG00000178460.18	19.0068	3.69641	0.923482	4.00269	6.26e-05	0.000936832	MCMDC2
ENSG00000198925.12	990.447	-0.904709	0.226065	-4.00199	6.28e-05	0.000938437	ATG9A
ENSG00000132623.16	38.4459	2.74597	0.686835	3.998	6.39e-05	0.000953508	ANKEF1
ENSG00000143183.16	1832.01	0.931926	0.23311	3.99779	6.39e-05	0.000953508	TMCO1
ENSG00000075429.8	35.9851	2.0703	0.517998	3.99673	6.42e-05	0.000956893	CACNG5
ENSG00000204209.13	571.651	-0.884982	0.221465	-3.99603	6.44e-05	0.00095887	DAXX
ENSG00000141337.12	26.5458	3.21042	0.803495	3.99557	6.45e-05	0.000958991	ARSG
ENSG00000179941.9	356.841	0.975402	0.244115	3.99567	6.45e-05	0.000958991	BBS10
ENSG00000163909.8	10.8301	5.78941	1.44958	3.99386	6.5e-05	0.000965046	HEYL
ENSG00000105723.12	656.42	-0.843935	0.211485	-3.99052	6.59e-05	0.000976982	GSK3A
ENSG00000147383.11	347.467	-1.16383	0.291636	-3.99069	6.59e-05	0.000976982	NSDHL
ENSG00000188483.8	61.6257	-1.80404	0.452167	-3.98977	6.61e-05	0.000979176	IER5L
ENSG00000142552.8	51.0787	1.90396	0.477401	3.98817	6.66e-05	0.000984895	RCN3
ENSG00000060140.9	10.9542	5.81006	1.45693	3.98787	6.67e-05	0.000985269	STYK1
ENSG00000232533.1	100.104	1.51735	0.380594	3.9868	6.7e-05	0.000988832	AC093673.1
ENSG00000162600.12	138.534	1.29	0.323628	3.98605	6.72e-05	0.000991041	OMA1
ENSG00000115762.16	3059.65	1.09719	0.275282	3.9857	6.73e-05	0.000991408	PLEKHB2
ENSG00000182257.8	31.5444	3.11072	0.780504	3.98553	6.73e-05	0.000991408	PRR34
ENSG00000173020.11	406.842	-1.01929	0.255791	-3.98487	6.75e-05	0.000993289	GRK2
ENSG00000175221.15	172.961	-1.36825	0.343558	-3.9826	6.82e-05	0.00100107	MED16
ENSG00000152954.12	172.05	1.12063	0.281396	3.98238	6.82e-05	0.00100107	NRSN1
ENSG00000173517.10	1271.07	1.00051	0.251225	3.98251	6.82e-05	0.00100107	PEAK1
ENSG00000101463.6	123.657	-1.38514	0.347937	-3.98101	6.86e-05	0.00100592	SYNDIG1
ENSG00000214435.8	161.811	-1.25652	0.315729	-3.97974	6.9e-05	0.00101042	AS3MT
ENSG00000088340.16	33.4131	2.65031	0.66625	3.97796	6.95e-05	0.00101711	FER1L4
ENSG00000169925.17	525.996	-0.925621	0.232757	-3.97678	6.99e-05	0.00102125	BRD3
ENSG00000181790.11	439.178	-1.2685	0.319013	-3.97633	7e-05	0.00102226	ADGRB1
ENSG00000182544.8	171.467	-1.11082	0.279429	-3.9753	7.03e-05	0.00102576	MFSD5
ENSG00000131943.17	269.705	-1.36153	0.342536	-3.97486	7.04e-05	0.00102678	C19orf12
ENSG00000162728.5	231.453	1.18793	0.299118	3.97144	7.14e-05	0.00103936	KCNJ9
ENSG00000100196.11	150.791	1.41332	0.355882	3.97132	7.15e-05	0.00103936	KDELR3
ENSG00000093000.19	900.525	-0.965075	0.242994	-3.9716	7.14e-05	0.00103936	NUP50
ENSG00000272341.1	91.7983	1.52372	0.383713	3.97098	7.16e-05	0.0010399	AL137003.2
ENSG00000233508.3	14.9112	4.12001	1.03771	3.97031	7.18e-05	0.00104192	AL021395.1
ENSG00000152455.16	222.665	-1.24564	0.31384	-3.96904	7.22e-05	0.00104654	SUV39H2
ENSG00000137075.18	820.508	-0.834274	0.210211	-3.96874	7.23e-05	0.00104695	RNF38
ENSG00000106733.21	77.3766	1.87824	0.47365	3.96546	7.33e-05	0.00105891	NMRK1
ENSG00000108830.10	1083.79	-0.851016	0.214611	-3.9654	7.33e-05	0.00105891	RND2
ENSG00000122012.14	39.1289	2.75939	0.695797	3.96579	7.32e-05	0.00105891	SV2C
ENSG00000270504.1	37.1775	2.0416	0.514946	3.96468	7.35e-05	0.00106115	AL391422.4
ENSG00000134247.10	6163.1	-1.23363	0.311185	-3.96429	7.36e-05	0.00106194	PTGFRN
ENSG00000145020.15	30.8648	2.30661	0.582144	3.96227	7.42e-05	0.00106922	AMT
ENSG00000169891.18	48.0021	2.69036	0.679	3.96224	7.42e-05	0.00106922	REPS2
ENSG00000113327.16	31.2589	2.45898	0.620841	3.96072	7.47e-05	0.00107511	GABRG2
ENSG00000266921.2	28.2886	2.66036	0.671843	3.95979	7.5e-05	0.00107739	AC006213.1
ENSG00000134602.16	33.1363	2.18943	0.552914	3.95981	7.5e-05	0.00107739	STK26
ENSG00000105329.10	344.846	1.07771	0.2722	3.95926	7.52e-05	0.00107887	TGFB1
ENSG00000157593.19	629.074	-0.853373	0.215685	-3.95658	7.6e-05	0.00109005	SLC35B2
ENSG00000064270.12	14.7508	3.5185	0.889619	3.95506	7.65e-05	0.00109603	ATP2C2
ENSG00000206172.8	10.6097	5.72559	1.44784	3.95456	7.67e-05	0.00109738	HBA1
ENSG00000133069.17	316.353	1.25839	0.318309	3.95336	7.71e-05	0.00110194	TMCC2
ENSG00000185565.12	1179.71	-0.944195	0.238871	-3.95274	7.73e-05	0.00110382	LSAMP
ENSG00000113083.14	56.5383	1.84274	0.466371	3.95124	7.77e-05	0.00110978	LOX
ENSG00000142606.16	24.4562	2.59752	0.657505	3.95057	7.8e-05	0.00111195	MMEL1
ENSG00000151729.11	1097.64	1.17122	0.296492	3.95027	7.81e-05	0.00111237	SLC25A4
ENSG00000276203.5	16.3303	3.93109	0.995292	3.94969	7.83e-05	0.00111411	ANKRD20A3
ENSG00000277739.1	35.8001	-8.71353	2.20709	-3.94797	7.88e-05	0.00112116	5_8S_rRNA
ENSG00000156171.14	284.823	-1.15227	0.291911	-3.94734	7.9e-05	0.00112312	DRAM2
ENSG00000187672.13	52.6146	1.93977	0.491555	3.94619	7.94e-05	0.00112754	ERC2
ENSG00000168824.14	360.947	-1.72763	0.438149	-3.94301	8.05e-05	0.0011416	NSG1
ENSG00000166432.15	399.699	1.21816	0.308964	3.94273	8.06e-05	0.00114194	ZMAT1
ENSG00000261884.2	98.1279	-1.84587	0.468259	-3.94198	8.08e-05	0.00114254	AC040162.1
ENSG00000287918.1	34.9821	2.91418	0.739267	3.94199	8.08e-05	0.00114254	AF274853.1
ENSG00000036448.10	55.4053	1.7134	0.434631	3.9422	8.07e-05	0.00114254	MYOM2
ENSG00000023902.14	533.442	-1.31911	0.334663	-3.9416	8.09e-05	0.0011434	PLEKHO1
ENSG00000109089.7	202.253	-1.10455	0.280434	-3.93873	8.19e-05	0.00115616	CDR2L
ENSG00000176871.8	1303.3	-1.02407	0.260137	-3.93665	8.26e-05	0.00116519	WSB2
ENSG00000173992.9	302.253	1.11704	0.28388	3.93492	8.32e-05	0.0011726	CCS
ENSG00000265808.4	2303.93	0.931805	0.236826	3.93455	8.34e-05	0.0011734	SEC22B
ENSG00000234664.1	199.885	-1.17666	0.299264	-3.93183	8.43e-05	0.00118572	HMGN2P5
ENSG00000169084.15	269.243	-1.47243	0.374728	-3.92931	8.52e-05	0.00119718	DHRSX
ENSG00000162522.11	135.569	1.57791	0.401609	3.92896	8.53e-05	0.00119791	KIAA1522
ENSG00000198865.10	98.0467	1.33249	0.339246	3.9278	8.57e-05	0.00120269	CCDC152
ENSG00000107745.19	579.848	1.08837	0.277133	3.92727	8.59e-05	0.0012043	MICU1
ENSG00000147655.12	10.7207	5.81664	1.48147	3.92627	8.63e-05	0.00120829	RSPO2
ENSG00000134222.16	1910.71	-1.1245	0.286507	-3.92485	8.68e-05	0.00121437	PSRC1
ENSG00000169169.14	499.997	-0.960614	0.244815	-3.92384	8.71e-05	0.00121845	CPT1C
ENSG00000186283.14	394.935	-1.03452	0.263704	-3.92304	8.74e-05	0.00122142	TOR3A
ENSG00000155846.17	35.1082	2.3085	0.588766	3.92092	8.82e-05	0.00123118	PPARGC1B
ENSG00000145721.12	59.0226	2.14669	0.547568	3.92042	8.84e-05	0.00123166	LIX1
ENSG00000103512.15	2673.85	0.995247	0.253856	3.92052	8.84e-05	0.00123166	NOMO1
ENSG00000138029.14	1709.57	0.834963	0.213019	3.91967	8.87e-05	0.00123444	HADHB
ENSG00000164172.19	702.339	0.829	0.211544	3.9188	8.9e-05	0.00123718	MOCS2
ENSG00000230844.3	99.6638	1.37454	0.350761	3.91872	8.9e-05	0.00123718	ZNF674-AS1
ENSG00000185386.15	157.914	-1.27499	0.325476	-3.91732	8.95e-05	0.00124335	MAPK11
ENSG00000121101.15	19.0824	2.96381	0.756809	3.91619	9e-05	0.00124814	TEX14
ENSG00000260285.1	52.1558	1.8945	0.483853	3.91545	9.02e-05	0.00125088	AL133367.1
ENSG00000146376.11	120.596	1.81408	0.463439	3.91437	9.06e-05	0.00125542	ARHGAP18
ENSG00000164627.18	17.1589	3.19259	0.815714	3.91386	9.08e-05	0.00125704	KIF6
ENSG00000085999.13	165.691	-1.51866	0.388219	-3.91186	9.16e-05	0.0012664	RAD54L
ENSG00000181215.15	31.4978	2.27002	0.580428	3.91093	9.19e-05	0.00127021	C4orf50
ENSG00000082684.16	174.25	-1.49471	0.382211	-3.91068	9.2e-05	0.00127044	SEMA5B
ENSG00000155313.15	329.095	0.938217	0.23995	3.91006	9.23e-05	0.00127267	USP25
ENSG00000160766.14	328.618	-0.904662	0.231509	-3.90767	9.32e-05	0.00128421	GBAP1
ENSG00000130270.16	24.4362	2.99962	0.767711	3.90722	9.34e-05	0.00128551	ATP8B3
ENSG00000012048.22	418.671	-1.00409	0.257101	-3.90542	9.41e-05	0.00129189	BRCA1
ENSG00000147400.9	887.984	0.877914	0.22478	3.90565	9.4e-05	0.00129189	CETN2
ENSG00000165061.15	133.458	1.28942	0.330147	3.90558	9.4e-05	0.00129189	ZMAT4
ENSG00000166797.11	166.038	-1.21075	0.310065	-3.90483	9.43e-05	0.00129392	CIAO2A
ENSG00000172785.18	333.152	1.04142	0.266715	3.90462	9.44e-05	0.00129397	CBWD1
ENSG00000157064.11	628.929	0.918215	0.235232	3.90344	9.48e-05	0.0012992	NMNAT2
ENSG00000249307.7	11.1192	4.70035	1.20431	3.90293	9.5e-05	0.00130087	LINC01088
ENSG00000164070.12	833.317	0.896369	0.22977	3.90115	9.57e-05	0.00130937	HSPA4L
ENSG00000105767.3	3168.99	-0.716901	0.18383	-3.8998	9.63e-05	0.00131557	CADM4
ENSG00000198796.7	1211.67	1.29633	0.332513	3.89859	9.68e-05	0.00132002	ALPK2
ENSG00000185305.11	264.087	1.04807	0.268834	3.89858	9.68e-05	0.00132002	ARL15
ENSG00000104059.4	28.9003	2.19727	0.564078	3.89534	9.81e-05	0.00133669	FAM189A1
ENSG00000186952.15	14.9043	3.70722	0.951768	3.89508	9.82e-05	0.00133697	TMEM232
ENSG00000198520.12	29.6729	2.42211	0.621958	3.89433	9.85e-05	0.00133876	ARMH1
ENSG00000168461.13	1731.92	0.75656	0.194281	3.89416	9.85e-05	0.00133876	RAB31
ENSG00000185875.13	497.754	0.871207	0.223705	3.89445	9.84e-05	0.00133876	THNSL1
ENSG00000106069.22	44.5976	2.69435	0.692205	3.89242	9.92e-05	0.00134724	CHN2
ENSG00000257839.1	11.8336	4.45566	1.14476	3.89221	9.93e-05	0.00134727	AC011611.4
ENSG00000250241.6	21.6735	2.81351	0.723255	3.89006	0.000100218	0.00135476	AC105383.1
ENSG00000223930.7	32.3459	3.16466	0.813499	3.89018	0.000100169	0.00135476	AC117453.1
ENSG00000112414.15	102.29	1.72641	0.44377	3.89033	0.000100109	0.00135476	ADGRG6
ENSG00000163618.18	508.966	-1.17662	0.302436	-3.89047	0.000100052	0.00135476	CADPS
ENSG00000248713.1	13.2982	5.16442	1.328	3.88886	0.000100717	0.00135926	C4orf54
ENSG00000168676.11	15.1908	4.98361	1.28149	3.88892	0.000100689	0.00135926	KCTD19
ENSG00000133401.16	30.3357	3.10366	0.798234	3.88815	0.000101011	0.00136211	PDZD2
ENSG00000272068.1	52.3466	2.24091	0.576631	3.88621	0.000101823	0.00137192	AL365181.2
ENSG00000080644.16	22.4903	2.8952	0.745847	3.88176	0.000103703	0.00139611	CHRNA3
ENSG00000174514.13	88.417	1.87656	0.483469	3.88144	0.000103838	0.00139677	MFSD4A
ENSG00000100416.15	453.974	-0.885852	0.228253	-3.881	0.000104027	0.00139815	TRMU
ENSG00000187193.9	392.961	1.73803	0.448208	3.87774	0.000105432	0.00141587	MT1X
ENSG00000101331.17	12.1346	5.11182	1.31854	3.87688	0.000105802	0.00141735	CCM2L
ENSG00000038532.16	516.37	1.07992	0.27855	3.87692	0.000105786	0.00141735	CLEC16A
ENSG00000184702.20	773.046	-0.969831	0.250142	-3.87712	0.000105699	0.00141735	SEPTIN5
ENSG00000185825.17	1269.87	1.02484	0.264396	3.87617	0.000106114	0.0014192	BCAP31
ENSG00000165175.15	287.328	-1.07489	0.277296	-3.87634	0.000106038	0.0014192	MID1IP1
ENSG00000124299.15	759.965	0.946851	0.244387	3.87439	0.00010689	0.00142841	PEPD
ENSG00000095752.7	46.2521	2.4329	0.628317	3.87209	0.000107905	0.00144079	IL11
ENSG00000272902.2	15.9489	3.14586	0.812767	3.87056	0.000108587	0.00144872	TBC1D8-AS1
ENSG00000143845.15	129.636	1.79821	0.464701	3.86961	0.000109011	0.00145319	ETNK2
ENSG00000163328.13	612.434	1.12624	0.291187	3.86775	0.000109843	0.00146308	GPR155
ENSG00000173621.9	219.38	-1.63118	0.421927	-3.86602	0.000110625	0.00146991	LRFN4
ENSG00000106772.18	1864.06	-0.858806	0.222125	-3.86633	0.000110487	0.00146991	PRUNE2
ENSG00000079689.14	38.0252	2.46442	0.637446	3.86609	0.000110593	0.00146991	SCGN
ENSG00000167363.14	78.7082	-1.48733	0.385034	-3.86284	0.000112074	0.00148795	FN3K
ENSG00000251136.9	333.711	1.13303	0.293371	3.86212	0.000112407	0.00149115	AF117829.1
ENSG00000122642.11	1679.29	-0.799883	0.207235	-3.85979	0.000113484	0.00150422	FKBP9
ENSG00000143198.13	667.134	0.874123	0.226503	3.85922	0.000113751	0.00150653	MGST3
ENSG00000124145.6	506.46	1.52251	0.394539	3.85896	0.000113868	0.00150686	SDC4
ENSG00000069667.16	80.4654	1.83987	0.476937	3.85767	0.000114475	0.00151366	RORA
ENSG00000128590.5	320.087	-1.35797	0.352069	-3.85712	0.000114732	0.00151572	DNAJB9
ENSG00000141540.11	417.189	-1.00881	0.261557	-3.85694	0.000114816	0.00151572	TTYH2
ENSG00000128191.16	490.528	-0.834265	0.216373	-3.85568	0.000115409	0.00152232	DGCR8
ENSG00000167513.9	94.6392	-1.52763	0.396343	-3.85431	0.000116057	0.00152963	CDT1
ENSG00000198842.10	65.4871	2.52571	0.655512	3.85303	0.000116667	0.00153642	DUSP27
ENSG00000168004.9	16.376	4.00857	1.04045	3.85272	0.000116811	0.00153709	PLAAT5
ENSG00000237172.4	160.212	-1.12534	0.292188	-3.85143	0.000117431	0.001544	B3GNT9
ENSG00000198258.10	971.366	0.871607	0.226473	3.84862	0.000118784	0.00156053	UBL5
ENSG00000135766.9	950.046	-0.973099	0.252979	-3.84656	0.000119785	0.00157242	EGLN1
ENSG00000232485.3	15.0461	3.66788	0.954002	3.84473	0.000120686	0.00158297	AC098820.1
ENSG00000132274.16	372.183	-1.55789	0.405267	-3.84411	0.000120989	0.00158567	TRIM22
ENSG00000149182.15	647.453	-0.836948	0.217815	-3.84247	0.000121804	0.00159388	ARFGAP2
ENSG00000255769.7	91.3181	1.40313	0.365166	3.84245	0.000121811	0.00159388	GOLGA2P10
ENSG00000253210.2	35.5155	1.98638	0.517079	3.84154	0.000122263	0.00159852	AC040970.1
ENSG00000214253.9	522.211	-0.99797	0.25998	-3.83865	0.000123714	0.0016162	FIS1
ENSG00000135905.19	31.2662	3.5296	0.920519	3.83436	0.00012589	0.00164239	DOCK10
ENSG00000072858.10	10.3348	6.58674	1.71784	3.8343	0.00012592	0.00164239	SIDT1
ENSG00000171161.13	367.506	-0.989305	0.258088	-3.83321	0.000126482	0.00164841	ZNF672
ENSG00000254615.3	347.858	1.35073	0.35245	3.83239	0.000126905	0.0016526	AC027031.2
ENSG00000204054.14	957.041	1.63588	0.426957	3.8315	0.000127364	0.00165726	LINC00963
ENSG00000166037.11	519.824	-0.938673	0.24505	-3.83053	0.000127866	0.00166246	CEP57
ENSG00000255920.3	15.9006	-3.20209	0.836169	-3.82948	0.000128415	0.00166827	CCND2-AS1
ENSG00000109452.12	76.1205	1.90402	0.498051	3.82294	0.000131871	0.00171045	INPP4B
ENSG00000249459.10	219.455	-1.27927	0.334626	-3.823	0.00013184	0.00171045	ZNF286B
ENSG00000103489.12	385.61	0.932429	0.244105	3.81979	0.000133567	0.00173107	XYLT1
ENSG00000137504.13	659.6	-1.03408	0.270796	-3.81867	0.000134174	0.00173756	CREBZF
ENSG00000101333.16	109.589	1.3512	0.353877	3.81828	0.000134388	0.00173895	PLCB4
ENSG00000150627.15	532.392	1.17713	0.308402	3.81686	0.000135162	0.00174758	WDR17
ENSG00000151208.17	941.862	-1.14897	0.301119	-3.81566	0.00013582	0.00175469	DLG5
ENSG00000163918.10	632.13	-0.924193	0.242252	-3.815	0.000136181	0.00175671	RFC4
ENSG00000115568.15	269.792	-0.938797	0.246081	-3.81499	0.000136191	0.00175671	ZNF142
ENSG00000257114.3	20.6425	2.76161	0.724142	3.81363	0.000136943	0.00176502	LINC02450
ENSG00000100813.14	1827.63	-0.778479	0.204233	-3.81172	0.000138004	0.00177692	ACIN1
ENSG00000118690.13	55.1577	2.03952	0.535087	3.81157	0.000138084	0.00177692	ARMC2
ENSG00000154920.14	222.256	-1.03983	0.273114	-3.80731	0.000140484	0.00180638	EME1
ENSG00000111247.14	190.424	-1.34788	0.354092	-3.80659	0.000140894	0.00181023	RAD51AP1
ENSG00000173457.11	728.198	-0.978081	0.257076	-3.80464	0.000142012	0.00182315	PPP1R14B
ENSG00000188266.14	20.6721	3.66044	0.962214	3.80419	0.000142269	0.00182503	HYKK
ENSG00000251350.2	44.3605	2.41643	0.635276	3.80374	0.000142528	0.00182658	LINC02475
ENSG00000105251.10	56.5193	-2.10442	0.553273	-3.80359	0.000142614	0.00182658	SHD
ENSG00000243742.5	18.4145	5.23939	1.37763	3.80319	0.000142843	0.00182807	RPLP0P2
ENSG00000104112.9	1424.98	0.844321	0.222105	3.80145	0.00014385	0.00183953	SCG3
ENSG00000167552.14	47359.8	-1.14964	0.302479	-3.80072	0.000144277	0.00184354	TUBA1A
ENSG00000245750.9	44.3559	2.41275	0.634938	3.79998	0.000144711	0.00184763	DRAIC
ENSG00000119969.15	204.87	-0.99285	0.261443	-3.79757	0.000146121	0.00186418	HELLS
ENSG00000120733.14	1015.88	-0.865581	0.228043	-3.7957	0.000147229	0.00187685	KDM3B
ENSG00000105576.15	1440.28	-0.813103	0.214253	-3.79506	0.000147608	0.00188022	TNPO2
ENSG00000164142.16	93.4853	2.21313	0.583591	3.79227	0.000149278	0.00190001	FAM160A1
ENSG00000172349.17	11.4608	-3.81251	1.0064	-3.78826	0.000151705	0.00192939	IL16
ENSG00000107897.19	704.321	-0.827333	0.218414	-3.78791	0.000151919	0.00192941	ACBD5
ENSG00000259343.7	12.2083	4.34271	1.14648	3.78787	0.000151942	0.00192941	TMC3-AS1
ENSG00000134072.11	221.199	-1.05508	0.2786	-3.78707	0.000152437	0.00193418	CAMK1
ENSG00000099960.13	12.3915	4.47669	1.18251	3.78575	0.000153243	0.0019429	SLC7A4
ENSG00000142621.19	13.0725	3.91699	1.03478	3.78534	0.000153496	0.0019446	FHAD1
ENSG00000261439.1	13.1886	3.85789	1.02005	3.78205	0.000155539	0.00196896	AC079411.1
ENSG00000174353.17	314.954	0.998919	0.264182	3.78118	0.00015609	0.0019744	STAG3L3
ENSG00000099715.14	11.9956	3.9641	1.04892	3.77923	0.000157313	0.00198833	PCDH11Y
ENSG00000177225.17	392.497	-0.875053	0.23157	-3.77879	0.000157594	0.0019888	GATD1
ENSG00000100403.12	979.467	-1.20947	0.320059	-3.77891	0.000157514	0.0019888	ZC3H7B
ENSG00000278970.2	154.419	-1.2301	0.325657	-3.77727	0.000158555	0.00199631	HEIH
ENSG00000114796.16	403.112	-1.03443	0.273832	-3.7776	0.000158349	0.00199631	KLHL24
ENSG00000141002.20	666.861	-0.913698	0.241883	-3.77744	0.000158449	0.00199631	TCF25
ENSG00000019505.8	212.759	1.14758	0.303871	3.77655	0.000159013	0.00200053	SYT13
ENSG00000052126.14	407.551	0.964105	0.255354	3.77556	0.000159651	0.00200701	PLEKHA5
ENSG00000272769.1	27.8676	2.19868	0.582466	3.77478	0.00016015	0.00201173	AC097532.2
ENSG00000030419.16	24.5128	2.81911	0.746931	3.77425	0.000160487	0.00201442	IKZF2
ENSG00000223812.8	18.692	4.17903	1.10745	3.77355	0.000160942	0.00201857	AC073365.1
ENSG00000130382.9	979.899	-0.84638	0.224388	-3.77195	0.000161979	0.00203002	MLLT1
ENSG00000156113.23	109.579	-1.6475	0.436961	-3.77036	0.000163011	0.00204139	KCNMA1
ENSG00000285043.1	44.5365	-1.87071	0.496241	-3.76976	0.000163407	0.00204478	AC093512.2
ENSG00000117154.12	129.51	-1.46482	0.388721	-3.7683	0.000164364	0.00205517	IGSF21
ENSG00000132676.16	1577.51	0.921453	0.244577	3.76754	0.000164865	0.00205987	DAP3
ENSG00000169710.9	1551.43	-0.878135	0.233273	-3.76441	0.000166942	0.00208423	FASN
ENSG00000150636.17	61.3737	1.75685	0.466807	3.76355	0.00016752	0.00208894	CCDC102B
ENSG00000164294.14	121.266	-1.42042	0.377423	-3.76346	0.000167575	0.00208894	GPX8
ENSG00000178498.16	730.221	-1.0125	0.269086	-3.76274	0.000168064	0.00209343	DTX3
ENSG00000196743.9	516.859	0.961176	0.255549	3.76122	0.000169085	0.00210455	GM2A
ENSG00000118292.9	71.7201	-1.43239	0.380916	-3.76039	0.000169651	0.00210947	C1orf54
ENSG00000107554.17	426.837	1.12603	0.299457	3.76026	0.000169739	0.00210947	DNMBP
ENSG00000152092.16	1775.1	-1.06843	0.284267	-3.75856	0.000170893	0.0021222	ASTN1
ENSG00000167747.14	175.518	-1.47382	0.392146	-3.75834	0.000171045	0.00212247	C19orf48
ENSG00000155254.13	137.307	-1.49325	0.397353	-3.75798	0.000171289	0.00212388	MARVELD1
ENSG00000250742.4	162.969	-1.06903	0.284578	-3.75654	0.00017228	0.00213455	LINC02381
ENSG00000132437.18	12.2765	3.94937	1.05162	3.75549	0.000173001	0.00214024	DDC
ENSG00000160803.8	1104.36	-0.785542	0.209166	-3.75558	0.000172938	0.00214024	UBQLN4
ENSG00000172379.21	1931.47	-1.30254	0.346978	-3.75396	0.000174065	0.00215176	ARNT2
ENSG00000061918.13	111.925	1.38251	0.368472	3.75202	0.000175417	0.00216683	GUCY1B1
ENSG00000120833.14	206.862	-1.18416	0.315825	-3.74941	0.000177248	0.0021878	SOCS2
ENSG00000092964.18	5011.32	-0.879136	0.234513	-3.74877	0.000177706	0.0021918	DPYSL2
ENSG00000162139.10	238.716	1.11928	0.298619	3.7482	0.00017811	0.00219513	NEU3
ENSG00000180758.12	27.633	2.67675	0.714261	3.74757	0.000178555	0.00219894	GPR157
ENSG00000147027.4	239.182	1.12346	0.299943	3.74556	0.00017999	0.00221494	TMEM47
ENSG00000198576.4	173.312	1.72774	0.461308	3.74531	0.00018017	0.00221549	ARC
ENSG00000111640.15	26895.1	-0.988685	0.264224	-3.74185	0.000182672	0.00224297	GAPDH
ENSG00000280989.2	10.966	-3.76134	1.00521	-3.74184	0.000182679	0.00224297	LINC00581
ENSG00000248098.12	198.601	-0.988904	0.264398	-3.74021	0.000183866	0.00225585	BCKDHA
ENSG00000151458.12	882.311	0.861798	0.230496	3.73889	0.000184833	0.002266	ANKRD50
ENSG00000109685.18	938.978	-0.934983	0.250114	-3.73822	0.000185327	0.00227036	NSD2
ENSG00000112139.16	663.497	-1.03386	0.276677	-3.7367	0.00018645	0.0022824	MDGA1
ENSG00000269858.6	367.636	-0.974534	0.260916	-3.73505	0.000187675	0.00229568	EGLN2
ENSG00000180198.16	364.91	-0.886756	0.237437	-3.7347	0.000187941	0.00229722	RCC1
ENSG00000125871.14	386.543	-1.06226	0.284497	-3.73382	0.000188594	0.00230175	MGME1
ENSG00000158079.16	27.799	2.73145	0.731527	3.73391	0.000188533	0.00230175	PTPDC1
ENSG00000150773.10	40.7209	2.20266	0.590258	3.73169	0.000190202	0.00231964	PIH1D2
ENSG00000127554.13	242.756	-1.11405	0.298694	-3.72973	0.000191686	0.00233454	GFER
ENSG00000267532.5	64.4177	-1.61475	0.432945	-3.7297	0.00019171	0.00233454	MIR497HG
ENSG00000237298.10	193.878	1.54802	0.415134	3.72897	0.000192262	0.00233952	TTN-AS1
ENSG00000079277.21	230.62	1.59371	0.428019	3.72345	0.000196515	0.00238771	MKNK1
ENSG00000121064.12	392.912	1.10909	0.297854	3.7236	0.000196405	0.00238771	SCPEP1
ENSG00000112379.9	299.113	0.910626	0.244586	3.72313	0.000196766	0.00238899	ARFGEF3
ENSG00000174370.10	18.0541	3.61237	0.970401	3.72255	0.000197218	0.00239221	C11orf45
ENSG00000111344.11	16.3508	3.87949	1.04221	3.72238	0.000197353	0.00239221	RASAL1
ENSG00000136631.15	1038.39	-0.846154	0.227325	-3.72223	0.000197471	0.00239221	VPS45
ENSG00000196159.11	209.502	1.24529	0.334656	3.72112	0.000198341	0.0023969	FAT4
ENSG00000027001.10	97.8428	1.5429	0.414648	3.72099	0.000198445	0.0023969	MIPEP
ENSG00000184162.14	228.189	-0.956657	0.257087	-3.72114	0.000198323	0.0023969	NR2C2AP
ENSG00000123610.5	336.998	1.20064	0.322653	3.72115	0.000198314	0.0023969	TNFAIP6
ENSG00000117632.23	6684.1	-1.22169	0.328474	-3.71928	0.000199794	0.00241141	STMN1
ENSG00000272944.1	31.1891	2.40098	0.645796	3.71786	0.000200914	0.00242312	AC079834.2
ENSG00000125450.11	352.525	-0.934643	0.251405	-3.71768	0.000201061	0.00242312	NUP85
ENSG00000277639.2	29.6303	2.4742	0.665678	3.71681	0.000201753	0.00242457	AC007906.2
ENSG00000276791.1	129.557	1.50935	0.40605	3.71715	0.000201484	0.00242457	AC092117.1
ENSG00000187244.11	110.394	1.356	0.364792	3.7172	0.000201444	0.00242457	BCAM
ENSG00000269226.7	142.571	-1.22694	0.330108	-3.71678	0.000201776	0.00242457	TMSB15B
ENSG00000224786.2	28.8713	2.1255	0.571918	3.71644	0.000202047	0.00242605	CETN4P
ENSG00000013583.10	210.563	1.16756	0.314201	3.71595	0.000202445	0.00242905	HEBP1
ENSG00000167614.14	1123.48	-0.86573	0.23314	-3.71335	0.000204533	0.0024523	TTYH1
ENSG00000135437.9	152.257	1.67174	0.450292	3.71256	0.000205176	0.0024582	RDH5
ENSG00000120820.12	21.4889	2.4882	0.670313	3.71199	0.000205635	0.00246189	GLT8D2
ENSG00000109738.11	147.217	1.19693	0.322503	3.71137	0.000206137	0.00246609	GLRB
ENSG00000254995.4	103.205	1.21017	0.326094	3.7111	0.000206362	0.00246698	STX16-NPEPL1
ENSG00000223745.8	47.5877	1.70856	0.460503	3.7102	0.000207098	0.00247397	CCDC18-AS1
ENSG00000122507.21	388.705	1.14729	0.309421	3.70787	0.000209007	0.00249494	BBS9
ENSG00000099308.10	250.119	1.68816	0.455336	3.7075	0.000209315	0.00249679	MAST3
ENSG00000077522.13	523.902	0.887657	0.239557	3.70541	0.000211049	0.00251564	ACTN2
ENSG00000107874.11	295.922	-0.973011	0.262722	-3.70357	0.000212585	0.00253211	CUEDC2
ENSG00000223396.4	17.9101	2.64996	0.715647	3.70289	0.00021316	0.0025371	RPS10P7
ENSG00000162976.13	154.588	1.43992	0.389144	3.70022	0.000215415	0.00256207	SLC66A3
ENSG00000126561.16	33.9002	2.49123	0.673381	3.69958	0.000215954	0.00256662	STAT5A
ENSG00000141569.12	205.559	-1.05947	0.286441	-3.69874	0.000216673	0.00257329	TRIM65
ENSG00000070808.16	226.719	1.50945	0.40825	3.69738	0.00021784	0.00258339	CAMK2A
ENSG00000131459.13	420.416	1.41732	0.383332	3.69738	0.000217837	0.00258339	GFPT2
ENSG00000102547.19	109.843	-1.36727	0.369993	-3.69539	0.00021955	0.00260178	CAB39L
ENSG00000186868.15	1299.34	-1.01573	0.274884	-3.69514	0.000219767	0.00260189	MAPT
ENSG00000112419.14	37.0102	2.32224	0.628481	3.69501	0.000219878	0.00260189	PHACTR2
ENSG00000151136.15	12.9192	3.79688	1.02773	3.69445	0.000220362	0.00260573	BTBD11
ENSG00000166716.10	699.592	-0.773326	0.20935	-3.69394	0.000220808	0.00260911	ZNF592
ENSG00000137831.15	210.226	1.33729	0.362157	3.69258	0.000221988	0.00262116	UACA
ENSG00000099194.6	9627.35	-1.05105	0.284737	-3.69131	0.000223102	0.00263238	SCD
ENSG00000143324.14	3577.89	0.750833	0.203415	3.69113	0.00022326	0.00263238	XPR1
ENSG00000170004.17	1684.46	-1.64872	0.446818	-3.68991	0.000224333	0.00264312	CHD3
ENSG00000138092.11	715.857	-1.1081	0.300422	-3.68846	0.000225612	0.00265627	CENPO
ENSG00000106078.19	599.256	0.870093	0.235909	3.68825	0.000225803	0.0026566	COBL
ENSG00000205930.10	35.6913	2.1124	0.572919	3.68709	0.000226832	0.00266486	C21orf62-AS1
ENSG00000135709.12	600.728	0.996632	0.270296	3.68719	0.000226742	0.00266486	KIAA0513
ENSG00000248508.8	135.192	1.4347	0.389244	3.68587	0.000227918	0.00267571	SRP14-AS1
ENSG00000008838.20	783.085	-0.840257	0.228025	-3.68494	0.000228759	0.00268364	MED24
ENSG00000111271.14	337.438	0.876323	0.237852	3.68432	0.000229313	0.00268821	ACAD10
ENSG00000287041.1	13.0647	4.17916	1.1347	3.68306	0.000230447	0.00269764	AC079354.3
ENSG00000204308.8	350.707	-1.00073	0.271701	-3.68319	0.000230333	0.00269764	RNF5
ENSG00000287769.1	49.6986	1.68254	0.456951	3.68211	0.000231316	0.00270586	AL353748.3
ENSG00000003137.8	81.6068	1.56857	0.426049	3.68166	0.000231722	0.00270868	CYP26B1
ENSG00000261268.1	22.7415	3.66405	0.995291	3.68139	0.000231965	0.00270958	AC112236.1
ENSG00000168005.9	163.611	-1.06205	0.28859	-3.68014	0.000233105	0.00272095	SPINDOC
ENSG00000204581.3	10.7135	4.94448	1.34407	3.67874	0.000234385	0.00273393	ACOXL-AS1
ENSG00000135519.8	81.9409	1.86464	0.507023	3.67762	0.000235423	0.00274408	KCNH3
ENSG00000049246.14	107.308	-1.18495	0.322282	-3.67674	0.000236237	0.00275161	PER3
ENSG00000205208.5	183.349	-1.01745	0.276755	-3.67635	0.000236596	0.00275187	C4orf46
ENSG00000167535.8	445.877	-0.995506	0.270776	-3.67649	0.000236464	0.00275187	CACNB3
ENSG00000076706.17	948.845	1.12758	0.307211	3.67038	0.000242192	0.00280895	MCAM
ENSG00000181588.16	113.407	-1.45803	0.397206	-3.67071	0.000241876	0.00280895	MEX3D
ENSG00000225683.6	115.239	2.46523	0.671588	3.67075	0.00024184	0.00280895	PACRG-AS3
ENSG00000059145.18	119.959	-1.11599	0.304041	-3.67053	0.000242046	0.00280895	UNKL
ENSG00000131773.14	275.534	0.917865	0.250164	3.66905	0.000243457	0.00282161	KHDRBS3
ENSG00000159167.12	3716.03	0.816177	0.222545	3.66747	0.000244964	0.00283707	STC1
ENSG00000168658.19	34.3711	2.54204	0.693353	3.66629	0.000246093	0.00284812	VWA3B
ENSG00000255389.1	73.2176	-1.73422	0.473292	-3.66418	0.000248136	0.00286973	Z97989.1
ENSG00000198483.13	16.8581	4.40604	1.2027	3.66346	0.000248832	0.00287025	ANKRD35
ENSG00000178538.10	166.922	1.35974	0.371169	3.66341	0.000248884	0.00287025	CA8
ENSG00000125656.11	204.161	-1.04926	0.286411	-3.66347	0.000248818	0.00287025	CLPP
ENSG00000159216.18	303.543	1.20602	0.329191	3.66358	0.00024871	0.00287025	RUNX1
ENSG00000282033.1	11.0561	4.85579	1.3262	3.66143	0.000250807	0.00289038	AC074387.1
ENSG00000188690.15	271.5	0.929315	0.253861	3.66072	0.000251503	0.00289637	UROS
ENSG00000237356.7	11.7667	3.89813	1.06538	3.65893	0.000253271	0.00291467	AL365295.1
ENSG00000167207.13	19.0072	2.75934	0.754317	3.65807	0.000254121	0.00292033	NOD2
ENSG00000196189.13	64.0723	1.72202	0.470726	3.65823	0.000253968	0.00292033	SEMA4A
ENSG00000213190.3	4656.95	-1.44005	0.393685	-3.65786	0.000254333	0.00292071	MLLT11
ENSG00000186185.14	486.257	-1.45472	0.39772	-3.65764	0.000254551	0.00292116	KIF18B
ENSG00000157985.19	675.269	0.940881	0.257283	3.65699	0.000255193	0.00292648	AGAP1
ENSG00000135828.11	191.076	1.10412	0.301938	3.65679	0.000255397	0.00292676	RNASEL
ENSG00000133466.14	207.85	-1.20791	0.330456	-3.65529	0.000256887	0.00294177	C1QTNF6
ENSG00000088992.18	18.082	3.15304	0.863192	3.65276	0.000259432	0.00296883	TESC
ENSG00000120725.13	357.079	1.06228	0.290833	3.65256	0.000259642	0.00296916	SIL1
ENSG00000257842.6	38.7718	2.03937	0.558414	3.65208	0.000260126	0.00297144	LINC02588
ENSG00000134253.10	229.219	1.18943	0.325693	3.652	0.000260206	0.00297144	TRIM45
ENSG00000165209.19	520.414	0.810427	0.221971	3.65105	0.000261174	0.00298042	STRBP
ENSG00000213999.17	19.571	3.06567	0.839869	3.65018	0.000262058	0.00298841	MEF2B
ENSG00000243710.7	10.9325	5.68851	1.55851	3.64998	0.000262262	0.00298865	CFAP57
ENSG00000011523.14	375.712	-0.878335	0.240662	-3.64966	0.000262584	0.00299023	CEP68
ENSG00000110324.10	28.0462	2.43135	0.666226	3.64944	0.000262816	0.00299079	IL10RA
ENSG00000104419.14	364.938	-1.60968	0.441225	-3.6482	0.000264089	0.00300318	NDRG1
ENSG00000153404.14	30.6107	2.39632	0.656975	3.64751	0.000264796	0.00300913	PLEKHG4B
ENSG00000257365.8	374.487	-1.18132	0.323939	-3.64673	0.000265598	0.00301615	FNTB
ENSG00000204371.11	807.265	-0.834003	0.228795	-3.64521	0.000267177	0.00303144	EHMT2
ENSG00000103485.19	257.961	-1.08294	0.297098	-3.64507	0.000267316	0.00303144	QPRT
ENSG00000103647.12	1330.62	-1.39927	0.38398	-3.64413	0.000268294	0.00304042	CORO2B
ENSG00000074219.13	377.824	-1.4717	0.403914	-3.6436	0.000268856	0.00304467	TEAD2
ENSG00000169093.16	263.304	1.44106	0.395613	3.6426	0.000269902	0.0030544	ASMTL
ENSG00000100605.17	755.898	-0.78398	0.215237	-3.64241	0.000270097	0.00305449	ITPK1
ENSG00000159720.12	1025.87	0.962574	0.264309	3.64185	0.000270688	0.00305694	ATP6V0D1
ENSG00000122952.17	359.123	-1.2249	0.336325	-3.642	0.000270531	0.00305694	ZWINT
ENSG00000106524.9	648.029	1.05495	0.289698	3.64156	0.000270988	0.00305821	ANKMY2
ENSG00000165516.11	354.372	-1.03076	0.283218	-3.63946	0.000273215	0.00308121	KLHDC2
ENSG00000221866.9	3036.25	-1.34365	0.369311	-3.63828	0.000274467	0.0030932	PLXNA4
ENSG00000108984.15	210.411	1.32468	0.364124	3.638	0.000274767	0.00309368	MAP2K6
ENSG00000198400.11	25.5443	3.23251	0.88857	3.63788	0.000274888	0.00309368	NTRK1
ENSG00000129991.13	17.4221	2.97033	0.816699	3.637	0.000275835	0.00310219	TNNI3
ENSG00000185842.15	11.4133	-5.96381	1.6405	-3.63535	0.000277606	0.00311781	DNAH14
ENSG00000188559.15	845.895	1.06807	0.29379	3.63551	0.000277432	0.00311781	RALGAPA2
ENSG00000173210.19	67.03	1.71382	0.471947	3.63138	0.000281908	0.00316178	ABLIM3
ENSG00000170876.7	682.358	-0.791318	0.217904	-3.63149	0.000281784	0.00316178	TMEM43
ENSG00000181220.17	317.761	-0.9809	0.27015	-3.63095	0.000282377	0.00316487	ZNF746
ENSG00000145864.12	88.163	1.96297	0.540797	3.62978	0.00028366	0.00317708	GABRB2
ENSG00000117115.13	307.381	1.94528	0.53631	3.62716	0.000286558	0.00320732	PADI2
ENSG00000122644.13	239.589	1.49619	0.412531	3.62685	0.000286903	0.003209	ARL4A
ENSG00000167508.12	291.691	-1.25877	0.347145	-3.62607	0.000287768	0.00321426	MVD
ENSG00000243819.4	26.0057	2.39477	0.660419	3.62614	0.000287694	0.00321426	RN7SL832P
ENSG00000184635.16	214.841	-1.05224	0.290247	-3.62533	0.000288596	0.00322131	ZNF93
ENSG00000155511.18	614.526	-1.1428	0.31547	-3.62252	0.00029175	0.00325429	GRIA1
ENSG00000197982.14	331.208	-0.978633	0.270194	-3.62197	0.00029237	0.00325897	C1orf122
ENSG00000126001.16	713.984	-0.956328	0.264072	-3.62147	0.000292932	0.00326141	CEP250
ENSG00000176728.9	78.5524	-1.31135	0.362109	-3.62142	0.000292988	0.00326141	TTTY14
ENSG00000145703.16	206.182	1.30988	0.361759	3.62087	0.000293608	0.00326609	IQGAP2
ENSG00000145777.15	11.2836	4.94286	1.36561	3.61954	0.000295132	0.00328081	TSLP
ENSG00000248027.1	11.1382	4.40133	1.21674	3.61733	0.000297661	0.00330258	AP001351.1
ENSG00000107262.23	292.645	-1.03502	0.286132	-3.6173	0.000297697	0.00330258	BAG1
ENSG00000118785.14	738.632	1.79778	0.496992	3.61732	0.000297668	0.00330258	SPP1
ENSG00000105792.19	22.4908	3.50677	0.969616	3.61666	0.000298429	0.00330845	CFAP69
ENSG00000275832.5	351.464	-0.985456	0.272589	-3.61517	0.000300145	0.00332522	ARHGAP23
ENSG00000227908.3	15.9697	3.25918	0.901917	3.61361	0.000301963	0.00333982	AC016596.1
ENSG00000287430.1	16.8717	3.08483	0.85362	3.61382	0.000301716	0.00333982	AL136090.2
ENSG00000181938.13	147.781	-1.2325	0.341113	-3.61316	0.000302486	0.00333982	GINS3
ENSG00000187678.9	221.126	1.24238	0.343844	3.61322	0.000302423	0.00333982	SPRY4
ENSG00000204186.10	263.32	1.05094	0.29084	3.61346	0.000302133	0.00333982	ZDBF2
ENSG00000067208.14	443.771	1.11919	0.309816	3.61242	0.000303355	0.00334715	EVI5
ENSG00000274414.1	14.4814	3.75177	1.03866	3.61214	0.000303681	0.00334849	AL121772.1
ENSG00000241163.8	45.4885	2.66884	0.738974	3.61155	0.000304378	0.00335391	LINC00877
ENSG00000143353.12	365.972	0.894788	0.247899	3.60948	0.000306811	0.00337617	LYPLAL1
ENSG00000182957.16	398.315	0.828832	0.229619	3.6096	0.00030667	0.00337617	SPATA13
ENSG00000232000.3	46.033	1.79324	0.497204	3.60665	0.00031017	0.00341083	CLCN3P1
ENSG00000156642.17	1396.31	0.944748	0.261976	3.60624	0.000310672	0.00341404	NPTN
ENSG00000124243.17	138.713	1.51686	0.421053	3.60253	0.000315132	0.00346073	BCAS4
ENSG00000230658.2	60.9594	2.19059	0.608214	3.60168	0.00031617	0.00346955	KLHL7-DT
ENSG00000158062.20	104.306	1.47016	0.408205	3.60152	0.00031636	0.00346955	UBXN11
ENSG00000183454.17	51.2063	2.60511	0.723521	3.6006	0.000317487	0.00347958	GRIN2A
ENSG00000162999.13	115.528	1.33974	0.372223	3.59929	0.00031909	0.0034948	DUSP19
ENSG00000081189.15	390.483	1.0003	0.277956	3.59879	0.000319706	0.0034992	MEF2C
ENSG00000105784.15	24.9227	2.73499	0.760298	3.59726	0.000321584	0.0035174	RUNDC3B
ENSG00000165169.11	411.289	0.862711	0.239928	3.5957	0.000323515	0.00353614	DYNLT3
ENSG00000166801.15	783.95	-1.00491	0.279511	-3.59525	0.000324077	0.00353992	FAM111A
ENSG00000179935.10	78.0188	1.5224	0.423509	3.59472	0.000324737	0.00354238	LINC00652
ENSG00000256751.6	51.6092	1.80069	0.500907	3.59485	0.000324573	0.00354238	PLBD1-AS1
ENSG00000146021.15	37.0691	2.66882	0.742695	3.59342	0.00032636	0.00355669	KLHL3
ENSG00000182836.10	15.6266	2.83209	0.788153	3.59333	0.000326484	0.00355669	PLCXD3
ENSG00000168491.10	23.8207	4.08838	1.13842	3.59127	0.000329068	0.00358246	CCDC110
ENSG00000177084.17	845.769	-0.913118	0.254414	-3.5891	0.000331817	0.00360997	POLE
ENSG00000126861.5	241.614	-1.85984	0.518226	-3.58886	0.00033213	0.00361098	OMG
ENSG00000064199.6	233.928	0.968374	0.269928	3.58752	0.000333837	0.00362712	SPA17
ENSG00000089091.16	84.7525	1.36269	0.379864	3.5873	0.000334126	0.00362784	DZANK1
ENSG00000108551.5	69.282	-1.50637	0.419985	-3.58673	0.000334851	0.0036333	RASD1
ENSG00000111961.18	385.694	0.886217	0.247125	3.58611	0.000335648	0.00363952	SASH1
ENSG00000106392.10	431.406	0.981687	0.273762	3.58592	0.000335892	0.00363976	C1GALT1
ENSG00000225518.3	14.1234	3.27568	0.913815	3.58462	0.000337568	0.00365549	LINC01703
ENSG00000138604.10	1151.29	0.715117	0.199621	3.58238	0.000340482	0.00368461	GLCE
ENSG00000128604.20	74.1648	1.53342	0.428078	3.5821	0.000340842	0.00368606	IRF5
ENSG00000130413.15	239.754	1.04612	0.292075	3.58168	0.000341389	0.00368954	STK33
ENSG00000119471.15	1056.18	0.744344	0.207874	3.58074	0.000342623	0.00370042	HSDL2
ENSG00000167770.11	605.04	-0.805158	0.224905	-3.57998	0.000343614	0.00370867	OTUB1
ENSG00000132510.10	454.877	-1.01714	0.284314	-3.57753	0.000346852	0.00374114	KDM6B
ENSG00000103037.11	174.968	-1.19178	0.333222	-3.57653	0.00034818	0.00375052	SETD6
ENSG00000106025.9	321.328	0.954088	0.266762	3.57656	0.00034815	0.00375052	TSPAN12
ENSG00000103876.12	173.257	1.14713	0.320781	3.57606	0.000348815	0.00375488	FAH
ENSG00000122574.10	66.5686	1.4966	0.418619	3.57509	0.000350111	0.00376634	WIPF3
ENSG00000197587.10	11.7131	4.33222	1.2123	3.57357	0.000352149	0.00378577	DMBX1
ENSG00000278948.1	117.609	-1.17154	0.327996	-3.57181	0.000354527	0.00380633	AL031587.5
ENSG00000104998.4	81.8997	1.53307	0.429196	3.57194	0.000354341	0.00380633	IL27RA
ENSG00000214022.11	710.224	-0.802943	0.224838	-3.5712	0.000355345	0.0038126	REPIN1
ENSG00000258655.2	90.8862	1.24034	0.347354	3.57083	0.000355853	0.00381555	ARHGAP5-AS1
ENSG00000081923.14	23.2435	2.82877	0.792267	3.57047	0.000356343	0.00381611	ATP8B1
ENSG00000112367.10	331.895	0.89464	0.25058	3.57027	0.000356607	0.00381611	FIG4
ENSG00000172260.15	188.305	-1.35418	0.379293	-3.57028	0.000356597	0.00381611	NEGR1
ENSG00000112977.15	1294.51	0.759397	0.212835	3.56801	0.000359707	0.00384677	DAP
ENSG00000187944.3	51.8537	-1.52784	0.428361	-3.56672	0.000361476	0.00386013	C2orf66
ENSG00000164114.19	322.382	1.10088	0.308664	3.56658	0.000361666	0.00386013	MAP9
ENSG00000204264.11	638.641	-1.25409	0.3516	-3.56681	0.00036135	0.00386013	PSMB8
ENSG00000128309.16	237.05	-1.22193	0.342729	-3.56529	0.000363457	0.00387671	MPST
ENSG00000204291.11	10.4819	4.00272	1.12316	3.56382	0.000365501	0.00389597	COL15A1
ENSG00000104490.18	959.504	0.81324	0.228336	3.5616	0.000368609	0.00392654	NCALD
ENSG00000136731.13	1953.54	1.01356	0.284751	3.55948	0.000371597	0.00395579	UGGT1
ENSG00000140961.14	84.7052	1.38538	0.389356	3.55814	0.000373493	0.00397338	OSGIN1
ENSG00000171388.12	133.169	-1.62853	0.457827	-3.55709	0.00037499	0.00398671	APLN
ENSG00000277142.1	37.3146	1.78278	0.501219	3.55689	0.000375274	0.00398713	LINC00235
ENSG00000174371.17	408.862	-0.8877	0.249678	-3.55538	0.000377438	0.00400752	EXO1
ENSG00000135378.4	25.1917	2.1276	0.598451	3.55517	0.000377728	0.00400799	PRRG4
ENSG00000130717.13	361.62	-0.980636	0.27589	-3.55445	0.000378774	0.00401648	UCK1
ENSG00000046647.13	118.953	1.19349	0.335894	3.55316	0.000380638	0.00403363	GEMIN8
ENSG00000274528.1	40.8565	2.01432	0.56708	3.55209	0.000382179	0.00404209	AC090970.2
ENSG00000107742.13	217.559	-1.02922	0.289729	-3.55235	0.0003818	0.00404209	SPOCK2
ENSG00000064419.13	2252.19	-0.811368	0.228416	-3.55215	0.000382093	0.00404209	TNPO3
ENSG00000027644.5	35.5895	2.10333	0.59232	3.55099	0.000383779	0.00405639	INSRR
ENSG00000172350.10	36.3596	1.93923	0.546137	3.55082	0.000384032	0.00405643	ABCG4
ENSG00000164062.13	877.779	0.971196	0.273574	3.55003	0.000385189	0.0040634	APEH
ENSG00000150867.14	911.926	0.938758	0.264433	3.55008	0.000385121	0.0040634	PIP4K2A
ENSG00000285205.2	69.3853	2.14382	0.604079	3.5489	0.000386846	0.00407561	AL121612.2
ENSG00000198892.6	550.75	-0.927189	0.261258	-3.54895	0.000386776	0.00407561	SHISA4
ENSG00000166478.10	269.356	0.910439	0.256576	3.54842	0.000387556	0.00408046	ZNF143
ENSG00000106789.13	35.5094	3.11026	0.877088	3.54612	0.000390953	0.00411357	CORO2A
ENSG00000198963.11	34.3092	2.18289	0.615622	3.54582	0.000391387	0.00411548	RORB
ENSG00000166803.13	359.101	-1.01779	0.287128	-3.54473	0.000393011	0.00412991	PCLAF
ENSG00000153363.13	123.165	1.31987	0.372463	3.54362	0.000394676	0.00414474	LINC00467
ENSG00000183578.8	38.3924	1.92597	0.543533	3.54343	0.000394963	0.00414508	TNFAIP8L3
ENSG00000153157.13	23.2393	2.38901	0.674268	3.54312	0.000395427	0.00414728	SYCP2L
ENSG00000112992.18	1048.97	-1.22401	0.345498	-3.54273	0.000396011	0.00415074	NNT
ENSG00000132329.11	113.117	-1.30583	0.368624	-3.54244	0.000396439	0.00415257	RAMP1
ENSG00000105642.15	42.1506	1.92433	0.543251	3.54225	0.000396736	0.00415301	KCNN1
ENSG00000156869.13	11.9023	4.47021	1.26217	3.54169	0.000397566	0.00415904	FRRS1
ENSG00000162804.14	34.9989	2.30764	0.651754	3.54065	0.000399137	0.00417279	SNED1
ENSG00000073711.11	126.253	1.18741	0.335463	3.53961	0.000400716	0.00418662	PPP2R3A
ENSG00000153237.18	14.079	4.29609	1.21379	3.53942	0.000401013	0.00418705	CCDC148
ENSG00000151067.22	93.3603	-1.30252	0.368087	-3.53863	0.000402216	0.00419693	CACNA1C
ENSG00000149657.20	693.914	-0.935067	0.264344	-3.53732	0.000404214	0.00421508	LSM14B
ENSG00000118308.15	10.2115	4.78445	1.35267	3.53704	0.000404639	0.00421681	LRMP
ENSG00000111664.10	118.58	-1.43629	0.406122	-3.5366	0.000405311	0.00421844	GNB3
ENSG00000104435.13	2833.44	-1.3061	0.369302	-3.53667	0.000405207	0.00421844	STMN2
ENSG00000133134.11	108.316	1.21445	0.343509	3.53544	0.000407102	0.00423169	BEX2
ENSG00000060688.13	402.595	-0.792722	0.224215	-3.53555	0.00040693	0.00423169	SNRNP40
ENSG00000274270.1	21.3388	2.51739	0.712136	3.53498	0.000407807	0.00423631	AL137060.3
ENSG00000115107.20	217.135	0.925482	0.261934	3.53326	0.000410465	0.00426121	STEAP3
ENSG00000280987.4	303.727	1.39327	0.394511	3.53163	0.000413006	0.00428487	MATR3
ENSG00000065268.10	121.307	-1.23185	0.348937	-3.53029	0.000415098	0.00430385	WDR18
ENSG00000258057.6	48.0149	1.75944	0.498437	3.52991	0.000415694	0.00430455	BCDIN3D-AS1
ENSG00000250337.7	71.9587	1.40512	0.398051	3.52999	0.00041557	0.00430455	PURPL
ENSG00000163808.17	542.326	-1.24661	0.353226	-3.5292	0.00041681	0.00431102	KIF15
ENSG00000047849.21	3450.76	-0.842912	0.23884	-3.52918	0.000416847	0.00431102	MAP4
ENSG00000136261.15	901.109	0.902878	0.255936	3.52775	0.000419104	0.00433162	BZW2
ENSG00000181007.9	264.796	-0.910074	0.258021	-3.52714	0.000420081	0.00433898	ZFP82
ENSG00000156968.9	68.7613	1.41624	0.40165	3.52605	0.000421806	0.00435404	MPV17L
ENSG00000204128.6	710.639	-1.12018	0.317726	-3.52563	0.000422481	0.00435825	C2orf72
ENSG00000064102.15	516.204	1.12903	0.320273	3.52521	0.000423147	0.00436236	INTS13
ENSG00000284713.1	12.8789	5.25206	1.49013	3.52456	0.000424187	0.00437033	SMIM38
ENSG00000132591.12	551.005	-0.793114	0.225079	-3.52372	0.000425534	0.00438145	ERAL1
ENSG00000265972.6	4186.7	1.30646	0.370863	3.52275	0.000427086	0.00439465	TXNIP
ENSG00000271122.1	510.107	1.11031	0.315261	3.52188	0.000428499	0.00439534	AC018647.2
ENSG00000135476.11	380.639	-1.10968	0.315079	-3.52191	0.000428457	0.00439534	ESPL1
ENSG00000171766.16	1108.81	-0.888316	0.252205	-3.52219	0.000427998	0.00439534	GATM
ENSG00000173826.14	12.4214	4.52444	1.28466	3.5219	0.000428472	0.00439534	KCNH6
ENSG00000130962.17	188.984	1.06998	0.303781	3.52223	0.000427936	0.00439534	PRRG1
ENSG00000172345.14	22.7086	3.61364	1.0268	3.51933	0.000432636	0.00443499	STARD5
ENSG00000223403.6	97.3636	1.49173	0.423953	3.51863	0.000433789	0.00444403	MEG9
ENSG00000187773.8	267.271	-1.29484	0.368087	-3.51776	0.000435202	0.00445291	DIPK1C
ENSG00000175206.10	16.7711	-2.84084	0.807546	-3.51787	0.000435029	0.00445291	NPPA
ENSG00000273888.1	32.9825	2.09778	0.596492	3.51687	0.000436676	0.00446519	FRMD6-AS1
ENSG00000228566.2	18.2492	3.33085	0.947362	3.51592	0.000438227	0.00447545	AC013287.1
ENSG00000089041.17	425.377	-0.978714	0.278362	-3.51597	0.000438149	0.00447545	P2RX7
ENSG00000247572.8	106.342	1.32274	0.376282	3.51528	0.000439294	0.00448355	CKMT2-AS1
ENSG00000185055.11	22.7225	3.12892	0.890211	3.51481	0.000440075	0.00448871	EFCAB10
ENSG00000285966.1	11.3594	4.37101	1.24383	3.51414	0.000441179	0.00449155	AC007686.4
ENSG00000106397.12	679.998	-0.827362	0.235427	-3.5143	0.000440919	0.00449155	PLOD3
ENSG00000237036.5	143.396	1.16085	0.33033	3.51422	0.000441055	0.00449155	ZEB1-AS1
ENSG00000104763.19	1607.81	0.675949	0.192439	3.51254	0.000443839	0.00451582	ASAH1
ENSG00000107099.15	13.4932	3.5882	1.02192	3.51125	0.000446009	0.00453508	DOCK8
ENSG00000172264.17	11.0128	4.36022	1.24196	3.51075	0.000446849	0.00454079	MACROD2
ENSG00000110900.15	1465.74	-1.10665	0.315251	-3.51039	0.000447452	0.00454408	TSPAN11
ENSG00000179604.10	1278.81	-1.08347	0.30867	-3.51014	0.000447874	0.00454555	CDC42EP4
ENSG00000141959.17	537.485	-0.960635	0.27374	-3.50929	0.000449303	0.00455722	PFKL
ENSG00000153113.23	631.062	0.850573	0.242419	3.5087	0.000450308	0.00456457	CAST
ENSG00000186204.15	81.7095	1.26973	0.362011	3.50744	0.000452433	0.00458327	CYP4F12
ENSG00000176953.12	522.952	-0.913855	0.260644	-3.50615	0.000454645	0.00460282	NFATC2IP
ENSG00000286616.1	16.529	4.55693	1.30002	3.50529	0.000456108	0.00461477	AL008730.1
ENSG00000280057.1	23.5402	2.54285	0.725521	3.50486	0.000456855	0.00461946	AL022069.2
ENSG00000104960.15	1011.36	-0.912263	0.260313	-3.50448	0.000457494	0.00462307	PTOV1
ENSG00000177879.16	685.61	0.758504	0.216494	3.50358	0.000459045	0.00463366	AP3S1
ENSG00000117399.14	814.084	-1.03484	0.295374	-3.5035	0.000459182	0.00463366	CDC20
ENSG00000158050.5	64.9128	4.9575	1.41506	3.50338	0.000459394	0.00463366	DUSP2
ENSG00000204442.4	20.705	2.63153	0.751323	3.50253	0.000460869	0.00464568	FAM155A
ENSG00000198612.11	1240.18	0.688797	0.196693	3.50189	0.000461965	0.00465385	COPS8
ENSG00000068305.17	711.997	0.8962	0.256023	3.50047	0.000464446	0.00467596	MEF2A
ENSG00000287539.1	26.6413	2.41356	0.689591	3.49998	0.000465286	0.00468153	AC022966.2
ENSG00000053501.13	82.3413	-1.23203	0.352053	-3.49955	0.000466051	0.00468634	USE1
ENSG00000155561.15	1439.24	-0.784194	0.224223	-3.49738	0.00046985	0.00472163	NUP205
ENSG00000104325.7	751.129	-0.874105	0.249946	-3.49717	0.000470215	0.00472239	DECR1
ENSG00000165304.8	591.543	-0.846175	0.241999	-3.49661	0.000471207	0.00472945	MELK
ENSG00000117859.19	556.905	0.838253	0.23985	3.4949	0.000474236	0.00475401	OSBPL9
ENSG00000161956.13	693.141	-0.87199	0.249501	-3.49494	0.000474167	0.00475401	SENP3
ENSG00000073060.16	912.709	-0.93938	0.268852	-3.49404	0.000475775	0.00476651	SCARB1
ENSG00000204348.10	159.935	-1.05979	0.303346	-3.49366	0.000476451	0.00477035	DXO
ENSG00000260714.1	13.0221	3.93619	1.12702	3.49257	0.000478396	0.00478689	AC133552.1
ENSG00000115194.11	47.5518	2.47161	0.707941	3.49127	0.000480729	0.00480729	SLC30A3
ENSG00000168216.13	418.781	0.892921	0.255907	3.48923	0.000484407	0.00484111	LMBRD1
ENSG00000141504.11	558.611	-0.954585	0.273638	-3.4885	0.000485734	0.0048514	SAT2
ENSG00000241472.7	62.3816	1.72626	0.495057	3.48699	0.000488491	0.00487595	PTPRG-AS1
ENSG00000123739.11	763.051	1.3045	0.374217	3.48596	0.000490372	0.00489174	PLA2G12A
ENSG00000172244.9	91.7107	-1.40462	0.40309	-3.48462	0.00049283	0.00491326	C5orf34
ENSG00000227885.3	12.6418	3.20922	0.921028	3.48439	0.000493263	0.00491458	AL590652.1
ENSG00000108176.15	40.7515	2.55735	0.733983	3.48421	0.000493594	0.00491487	DNAJC12
ENSG00000014216.15	583.995	-0.846847	0.243097	-3.48358	0.000494763	0.00492351	CAPN1
ENSG00000094804.12	341.884	-1.25702	0.36099	-3.48214	0.00049743	0.00494703	CDC6
ENSG00000126947.13	298.901	-1.06557	0.306058	-3.48159	0.000498451	0.00495418	ARMCX1
ENSG00000178761.15	716.967	-0.882006	0.253365	-3.48117	0.000499231	0.00495891	FAM219B
ENSG00000188282.12	10.3279	3.70192	1.06357	3.48064	0.000500214	0.00496565	RUFY4
ENSG00000233932.6	24.08	2.67009	0.767195	3.48033	0.000500796	0.0049684	CTXN2
ENSG00000164741.15	256.423	1.25896	0.361918	3.47858	0.000504076	0.00499488	DLC1
ENSG00000197296.6	356.994	0.960626	0.276147	3.47867	0.000503902	0.00499488	FITM2
ENSG00000237638.2	15.1967	3.09875	0.891261	3.47681	0.00050742	0.00502496	LINC02245
ENSG00000182134.16	519.984	1.14585	0.329636	3.47611	0.000508738	0.00503496	TDRKH
ENSG00000171604.12	929.986	-1.0985	0.316041	-3.4758	0.000509338	0.00503785	CXXC5
ENSG00000269955.2	277.027	-1.52446	0.438664	-3.47524	0.000510389	0.00504519	FMC1-LUC7L2
ENSG00000180806.5	101.248	-1.48858	0.42843	-3.47449	0.00051182	0.00505627	HOXC9
ENSG00000101474.12	2026.3	0.873379	0.251424	3.47372	0.000513289	0.00506747	APMAP
ENSG00000164896.20	586.466	-0.746932	0.215043	-3.47341	0.000513884	0.00506747	FASTK
ENSG00000169116.11	1079.1	0.976492	0.281131	3.47344	0.000513825	0.00506747	PARM1
ENSG00000096080.11	331.084	-0.8769	0.25249	-3.473	0.000514667	0.00507212	MRPS18A
ENSG00000137691.13	11.5348	4.21022	1.21233	3.47284	0.000514989	0.00507224	CFAP300
ENSG00000115649.16	523.222	-1.0034	0.288998	-3.472	0.000516596	0.005085	CNPPD1
ENSG00000137563.12	829.275	0.731633	0.210745	3.47165	0.00051727	0.00508856	GGH
ENSG00000132541.11	352.934	1.00653	0.290002	3.47078	0.000518954	0.00510206	RIDA
ENSG00000143375.15	191.35	1.55313	0.447541	3.47037	0.000519748	0.00510679	CGN
ENSG00000139629.16	16.0865	3.14234	0.905562	3.47005	0.000520365	0.00510978	GALNT6
ENSG00000240764.3	1049.51	1.06669	0.307413	3.46988	0.000520696	0.00510995	PCDHGC5
ENSG00000169715.15	45.7685	1.9485	0.561665	3.46914	0.000522124	0.0051209	MT1E
ENSG00000182952.5	672.619	-0.984087	0.283708	-3.46867	0.000523048	0.00512688	HMGN4
ENSG00000170540.15	10924.3	0.700341	0.201972	3.46752	0.000525291	0.00513788	ARL6IP1
ENSG00000146918.20	1058.45	-0.676682	0.195147	-3.46755	0.00052522	0.00513788	NCAPG2
ENSG00000100991.12	1030.63	-0.733847	0.211632	-3.46756	0.00052521	0.00513788	TRPC4AP
ENSG00000172687.13	177.02	-1.08502	0.312916	-3.46745	0.000525429	0.00513788	ZNF738
ENSG00000162302.13	85.9451	-1.4116	0.407147	-3.46705	0.000526212	0.00514246	RPS6KA4
ENSG00000112640.15	998.255	-0.742962	0.214326	-3.4665	0.000527286	0.00514987	PPP2R5D
ENSG00000137869.15	34.7	2.57944	0.744361	3.46531	0.000529627	0.00516964	CYP19A1
ENSG00000089639.11	168.219	-1.189	0.343353	-3.46291	0.000534364	0.00521276	GMIP
ENSG00000261360.1	12.8156	2.91875	0.843151	3.46172	0.000536736	0.0052229	AC010491.1
ENSG00000140470.14	51.7415	1.89757	0.548179	3.46159	0.000537002	0.0052229	ADAMTS17
ENSG00000118523.6	60.5598	1.54956	0.447563	3.46221	0.000535751	0.0052229	CCN2
ENSG00000154429.11	1544.82	-0.978591	0.282687	-3.46175	0.000536681	0.0052229	CCSAP
ENSG00000138867.16	542.955	-0.924577	0.267076	-3.46185	0.000536479	0.0052229	GUCD1
ENSG00000183111.12	81.683	1.80256	0.520867	3.4607	0.000538782	0.00523397	ARHGEF37
ENSG00000067992.15	559.595	0.952052	0.275094	3.46083	0.00053852	0.00523397	PDK3
ENSG00000085514.16	101.645	1.20199	0.347584	3.45813	0.000543934	0.00528088	PILRA
ENSG00000154914.17	14.31	3.35083	0.969307	3.45693	0.00054637	0.00530138	USP43
ENSG00000089351.14	411.117	-1.01639	0.294039	-3.45663	0.000546974	0.00530409	GRAMD1A
ENSG00000118655.7	303.378	-1.07755	0.311837	-3.45549	0.0005493	0.00532349	DCLRE1B
ENSG00000112812.16	14.0333	3.31436	0.959799	3.45318	0.00055401	0.00536594	PRSS16
ENSG00000196776.16	501.628	0.759958	0.220121	3.45245	0.000555513	0.00537681	CD47
ENSG00000243926.2	13.8032	3.23583	0.937291	3.45232	0.00055579	0.00537681	TIPARP-AS1
ENSG00000123643.13	686.691	0.711385	0.206125	3.45124	0.000558027	0.00539525	SLC36A1
ENSG00000276900.1	43.0272	2.30821	0.66887	3.45091	0.000558691	0.00539848	AC023157.3
ENSG00000288048.1	51.5772	2.30703	0.668762	3.44971	0.000561199	0.0054195	AC104088.3
ENSG00000168528.12	87.5612	1.34185	0.389073	3.44885	0.000562983	0.00543352	SERINC2
ENSG00000164008.16	210.727	-1.23206	0.357352	-3.44775	0.000565285	0.00545028	C1orf50
ENSG00000114853.14	735.665	-0.964476	0.279745	-3.4477	0.000565388	0.00545028	ZBTB47
ENSG00000117362.13	1422.93	-0.882554	0.256055	-3.44674	0.0005674	0.00546645	APH1A
ENSG00000050820.17	299.643	-0.915004	0.265561	-3.44555	0.000569889	0.0054872	BCAR1
ENSG00000135929.9	139.675	-1.34231	0.389679	-3.44465	0.000571802	0.00550238	CYP27A1
ENSG00000101220.17	233.668	1.37143	0.398315	3.44309	0.000575109	0.00552872	C20orf27
ENSG00000154370.16	194.494	-1.22184	0.354873	-3.44304	0.000575217	0.00552872	TRIM11
ENSG00000169071.15	10.4801	4.33266	1.25859	3.44247	0.000576421	0.00553518	ROR2
ENSG00000102870.6	472.721	-0.766839	0.222763	-3.4424	0.000576567	0.00553518	ZNF629
ENSG00000124067.17	1213.49	-0.820654	0.238612	-3.43928	0.00058327	0.00559624	SLC12A4
ENSG00000224944.2	15.0214	4.36604	1.26963	3.43882	0.000584247	0.00560232	CASC6
ENSG00000163531.15	539.755	1.0941	0.318324	3.43705	0.000588077	0.00563435	NFASC
ENSG00000265763.4	21.39	2.57731	0.749879	3.43696	0.000588278	0.00563435	ZNF488
ENSG00000129235.11	682.008	0.823895	0.239782	3.43601	0.000590343	0.00565082	TXNDC17
ENSG00000151611.16	140.067	1.19016	0.346421	3.4356	0.000591245	0.00565283	MMAA
ENSG00000043514.17	189.002	-0.991028	0.288453	-3.43566	0.000591103	0.00565283	TRIT1
ENSG00000126217.21	251.107	-0.951234	0.27689	-3.43542	0.000591636	0.00565326	MCF2L
ENSG00000136449.15	52.7189	1.74061	0.506911	3.43376	0.000595277	0.00568472	MYCBPAP
ENSG00000197106.7	13.5352	3.57586	1.0416	3.43303	0.000596871	0.00569661	SLC6A17
ENSG00000127616.18	1458.81	-0.760046	0.221414	-3.43268	0.000597641	0.00570063	SMARCA4
ENSG00000134265.13	298.88	0.987473	0.28797	3.42908	0.000605639	0.00577355	NAPG
ENSG00000267640.6	135.673	1.05525	0.307822	3.42813	0.000607758	0.00579037	AC016582.3
ENSG00000170290.4	98.1953	1.34937	0.393635	3.42797	0.000608118	0.00579041	SLN
ENSG00000060642.10	189.045	1.09693	0.320104	3.4268	0.00061073	0.0058097	PIGV
ENSG00000179542.16	98.3018	1.37266	0.400572	3.42675	0.000610855	0.0058097	SLITRK4
ENSG00000111653.20	225.305	-1.07827	0.314723	-3.42609	0.000612348	0.00582052	ING4
ENSG00000163781.14	362.907	-0.889339	0.25967	-3.42488	0.000615062	0.00584291	TOPBP1
ENSG00000101608.12	332.214	1.0921	0.318973	3.42381	0.0006175	0.00586266	MYL12A
ENSG00000204311.14	85.4421	1.32027	0.385719	3.42289	0.000619587	0.00587906	PJVK
ENSG00000166689.16	17.4396	3.10148	0.906171	3.42262	0.000620209	0.00588154	PLEKHA7
ENSG00000004777.18	390.013	-1.00153	0.292749	-3.42112	0.000623643	0.00591068	ARHGAP33
ENSG00000120899.18	429.867	0.939727	0.274738	3.42044	0.000625195	0.00592195	PTK2B
ENSG00000119333.11	332.446	-0.96147	0.281127	-3.42006	0.000626069	0.00592679	WDR34
ENSG00000133027.18	66.1036	-1.38261	0.404415	-3.4188	0.000628981	0.0059509	PEMT
ENSG00000162944.11	557.466	-1.5589	0.45605	-3.41827	0.000630203	0.00595901	RFTN2
ENSG00000161939.19	57.0118	-2.22931	0.652244	-3.4179	0.000631055	0.00596362	RNASEK-C17orf49
ENSG00000071282.12	61.8874	1.76517	0.516665	3.41646	0.000634406	0.0059896	LMCD1
ENSG00000183036.11	1136.96	-1.13428	0.33201	-3.41641	0.000634538	0.0059896	PCP4
ENSG00000288026.1	32.8612	3.17095	0.928595	3.41478	0.000638332	0.00601967	AC096996.3
ENSG00000259291.2	156.678	-1.07162	0.313822	-3.41473	0.000638461	0.00601967	ZNF710-AS1
ENSG00000110328.6	152.829	1.15509	0.338423	3.41316	0.000642143	0.0060474	GALNT18
ENSG00000159055.4	204.738	-0.905059	0.265156	-3.4133	0.000641803	0.0060474	MIS18A
ENSG00000081059.20	89.5549	1.3635	0.399732	3.41104	0.000647166	0.00609119	TCF7
ENSG00000265778.3	10.0665	4.39201	1.28779	3.4105	0.000648434	0.0060961	AC018413.1
ENSG00000250486.4	59.0699	1.59151	0.466633	3.41062	0.000648165	0.0060961	FAM218A
ENSG00000198455.4	229.939	-0.98054	0.287567	-3.40978	0.000650157	0.00610879	ZXDB
ENSG00000189308.11	218.174	-1.13263	0.332258	-3.40888	0.000652301	0.0061254	LIN54
ENSG00000111052.7	22.5439	2.74564	0.805556	3.40838	0.000653493	0.00613307	LIN7A
ENSG00000121774.18	1974.81	-0.735203	0.215744	-3.40775	0.00065501	0.00614377	KHDRBS1
ENSG00000223953.6	53.9492	-1.62487	0.477011	-3.40636	0.000658358	0.00616809	C1QTNF5
ENSG00000157483.9	299.116	0.932857	0.273846	3.4065	0.000658021	0.00616809	MYO1E
ENSG00000269378.1	155.784	1.31251	0.385504	3.40467	0.000662429	0.00619912	AC022149.1
ENSG00000106049.9	316.256	0.818787	0.240479	3.40481	0.000662089	0.00619912	HIBADH
ENSG00000117592.9	4449.42	-0.933251	0.274135	-3.40435	0.000663214	0.00620291	PRDX6
ENSG00000229847.9	12.5885	3.24605	0.953616	3.40394	0.000664225	0.00620881	EMX2OS
ENSG00000034152.19	354.445	1.49194	0.438368	3.40339	0.00066554	0.00621755	MAP2K3
ENSG00000143924.19	664.187	0.934145	0.274503	3.40304	0.000666404	0.00621878	EML4
ENSG00000197385.6	14.1755	3.13866	0.922314	3.40303	0.000666434	0.00621878	ZNF860
ENSG00000187240.16	343.571	1.53165	0.450147	3.40254	0.00066762	0.00622629	DYNC2H1
ENSG00000131828.14	998.583	0.715792	0.21039	3.40221	0.000668422	0.00623021	PDHA1
ENSG00000166313.19	731.376	-0.820873	0.241289	-3.40203	0.000668861	0.00623075	APBB1
ENSG00000196517.11	198.383	-1.3921	0.409248	-3.40162	0.000669885	0.00623673	SLC6A9
ENSG00000166816.14	19.0268	2.71854	0.799471	3.40043	0.000672809	0.00626039	LDHD
ENSG00000138180.16	217.632	-0.919318	0.270497	-3.39863	0.000677252	0.00629814	CEP55
ENSG00000164713.10	300.739	-0.977336	0.287641	-3.39776	0.000679404	0.00631096	BRI3
ENSG00000100302.7	118.565	1.07432	0.316184	3.39778	0.000679353	0.00631096	RASD2
ENSG00000172115.8	4029.5	0.773081	0.227551	3.3974	0.000680304	0.00631573	CYCS
ENSG00000162620.16	46.1249	1.96893	0.579738	3.39625	0.00068317	0.00633873	LRRIQ3
ENSG00000143125.6	10.222	4.87118	1.43465	3.39538	0.000685326	0.00635512	PROK1
ENSG00000275763.3	18.0404	2.85154	0.8399	3.39509	0.00068606	0.00635832	C18orf65
ENSG00000163322.14	155.012	1.08027	0.318247	3.39444	0.000687694	0.00636984	ABRAXAS1
ENSG00000113739.10	194.912	-1.98387	0.584497	-3.39416	0.000688403	0.0063728	STC2
ENSG00000215105.4	1044.44	0.921963	0.271758	3.39259	0.000692345	0.00640566	TTC3P1
ENSG00000073803.14	933.784	0.779076	0.229711	3.39155	0.000694993	0.00642652	MAP3K13
ENSG00000107738.20	31.9825	2.76407	0.815058	3.39126	0.000695719	0.00642959	VSIR
ENSG00000213073.4	35.2977	1.86668	0.55059	3.39032	0.000698102	0.00644797	AL353625.1
ENSG00000286389.1	11.0072	4.33635	1.27918	3.38993	0.000699105	0.00645358	AL731702.1
ENSG00000009954.11	2706.94	-0.818009	0.241389	-3.38876	0.000702099	0.00647756	BAZ1B
ENSG00000103021.9	329.555	1.11011	0.327695	3.38764	0.00070497	0.00649304	CCDC113
ENSG00000131351.15	120.337	-1.09334	0.322723	-3.38784	0.000704441	0.00649304	HAUS8
ENSG00000205220.12	66.4984	-1.3994	0.413089	-3.38765	0.000704933	0.00649304	PSMB10
ENSG00000168772.11	144.212	1.29319	0.381858	3.38658	0.000707699	0.00651451	CXXC4
ENSG00000113758.13	1786.8	-0.998565	0.294892	-3.3862	0.000708676	0.00651982	DBN1
ENSG00000139192.12	50.3546	-1.535	0.453496	-3.38481	0.000712264	0.00654914	TAPBPL
ENSG00000140876.11	36.8179	2.55578	0.755296	3.38381	0.000714872	0.00656942	NUDT7
ENSG00000126500.3	203.045	-1.55162	0.458661	-3.38294	0.000717144	0.00658659	FLRT1
ENSG00000065923.10	392.424	1.36307	0.40303	3.38206	0.000719446	0.00660402	SLC9A7
ENSG00000100027.16	232.218	-1.21363	0.359069	-3.37993	0.000725033	0.00665157	YPEL1
ENSG00000141905.19	752.075	-1.16132	0.343882	-3.3771	0.000732541	0.00671667	NFIC
ENSG00000132478.10	254.889	-1.2643	0.374417	-3.37673	0.000733539	0.00672205	UNK
ENSG00000157766.17	14.3768	3.10521	0.919668	3.37644	0.000734294	0.00672519	ACAN
ENSG00000100300.18	117.147	-1.15038	0.340779	-3.37574	0.000736164	0.00673854	TSPO
ENSG00000145506.14	18.7923	2.83811	0.841097	3.3743	0.000740037	0.0067702	NKD2
ENSG00000197081.14	1863.24	0.96881	0.287153	3.37385	0.000741258	0.00677757	IGF2R
ENSG00000279879.1	10.1847	3.74786	1.11097	3.37349	0.000742206	0.00678244	AC091152.4
ENSG00000197261.11	92.7733	2.33523	0.692295	3.37317	0.000743094	0.00678676	C6orf141
ENSG00000100938.17	360.052	-0.789735	0.23422	-3.37176	0.000746895	0.00681766	GMPR2
ENSG00000111674.9	3099.64	-1.09733	0.325488	-3.37133	0.000748074	0.0068208	ENO2
ENSG00000170345.10	474.21	1.15129	0.34149	3.37137	0.000747953	0.0068208	FOS
ENSG00000150054.18	14.4037	3.42462	1.01637	3.36946	0.000753149	0.00686324	MPP7
ENSG00000115548.17	1032.01	-0.996118	0.29567	-3.36902	0.000754362	0.00687046	KDM3A
ENSG00000274422.1	30.0072	1.95612	0.580762	3.36819	0.000756622	0.0068872	AC245060.5
ENSG00000164548.11	703.724	-0.760384	0.225795	-3.36759	0.000758294	0.00689857	TRA2A
ENSG00000198837.10	721.966	-0.880738	0.261662	-3.36594	0.00076284	0.00693607	DENND4B
ENSG00000137312.15	1403.38	-0.752305	0.223521	-3.3657	0.000763487	0.00693809	FLOT1
ENSG00000204634.12	86.9259	1.29809	0.385719	3.36539	0.000764366	0.00694221	TBC1D8
ENSG00000179750.16	125.242	-1.33692	0.397303	-3.36498	0.000765486	0.00694682	APOBEC3B
ENSG00000164543.7	1056.93	0.740179	0.219971	3.3649	0.000765724	0.00694682	STK17A
ENSG00000125901.6	217.016	-1.04316	0.310068	-3.3643	0.000767368	0.00695787	MRPS26
ENSG00000111144.10	680.56	0.814822	0.242227	3.36387	0.000768569	0.00696489	LTA4H
ENSG00000164694.17	13.708	3.25707	0.968706	3.36229	0.000772989	0.0069998	FNDC1
ENSG00000132613.15	1730.06	-0.959529	0.285388	-3.36219	0.000773278	0.0069998	MTSS2
ENSG00000168488.18	1090.6	-0.695789	0.206972	-3.36175	0.000774498	0.00700695	ATXN2L
ENSG00000134061.5	15.6119	3.4006	1.01164	3.36148	0.000775273	0.00701008	CD180
ENSG00000113361.13	394.479	1.44163	0.428968	3.3607	0.000777457	0.0070143	CDH6
ENSG00000100523.14	544.195	0.979565	0.291475	3.36072	0.000777405	0.0070143	DDHD1
ENSG00000162591.16	36.0997	1.80288	0.536421	3.36094	0.000776765	0.0070143	MEGF6
ENSG00000147231.14	403.064	1.04864	0.311993	3.3611	0.000776314	0.0070143	RADX
ENSG00000068366.20	441.108	0.746097	0.222043	3.36015	0.000779005	0.00702438	ACSL4
ENSG00000243244.6	86.0328	1.25207	0.372698	3.35948	0.000780898	0.00703756	STON1
ENSG00000198692.10	898.769	0.867345	0.258191	3.35931	0.000781362	0.00703786	EIF1AY
ENSG00000121310.17	50.6255	1.74522	0.519551	3.35909	0.000781996	0.00703969	ECHDC2
ENSG00000177045.10	66.2613	-1.50631	0.4486	-3.35779	0.000785679	0.00706894	SIX5
ENSG00000140848.17	629.534	-1.09166	0.32525	-3.35637	0.000789717	0.00710136	CPNE2
ENSG00000123612.16	31.7584	2.0028	0.596776	3.35603	0.000790706	0.00710634	ACVR1C
ENSG00000213906.10	46.7055	2.15889	0.643367	3.35561	0.000791907	0.00711322	LTB4R2
ENSG00000123560.14	1165.27	-1.31773	0.392774	-3.35493	0.000793856	0.00712681	PLP1
ENSG00000279191.1	13.7323	3.31502	0.988462	3.35371	0.000797349	0.00714638	AC068491.4
ENSG00000203797.10	132.031	1.20842	0.360318	3.35377	0.000797183	0.00714638	DDO
ENSG00000260930.2	12.6306	4.76157	1.41978	3.35374	0.000797287	0.00714638	LINC01416
ENSG00000236397.3	24.8952	2.04728	0.610532	3.35327	0.000798617	0.00715382	DDX11L2
ENSG00000091490.11	815.023	1.39171	0.415305	3.35105	0.000805047	0.00720746	SEL1L3
ENSG00000174807.4	13.839	3.58826	1.07086	3.35083	0.000805701	0.00720937	CD248
ENSG00000155957.17	278.146	-0.849714	0.2536	-3.3506	0.000806364	0.00721135	TMBIM4
ENSG00000076248.10	421.869	-0.938946	0.280295	-3.34985	0.000808547	0.00722691	UNG
ENSG00000188191.15	164.284	-1.42031	0.424097	-3.34902	0.000810971	0.00724462	PRKAR1B
ENSG00000188070.9	1017.86	-0.912297	0.272464	-3.34832	0.000813032	0.00725112	C11orf95
ENSG00000124440.15	12.5276	4.49065	1.34105	3.34862	0.000812149	0.00725112	HIF3A
ENSG00000224358.1	30.8506	1.98489	0.592799	3.34833	0.000813006	0.00725112	TMCO1-AS1
ENSG00000154217.15	351.072	-0.838583	0.250461	-3.34816	0.000813488	0.00725123	PITPNC1
ENSG00000141404.16	16.5154	3.93002	1.17409	3.34729	0.000816069	0.00727027	GNAL
ENSG00000114573.10	843.979	0.705248	0.210822	3.34523	0.000822148	0.00732044	ATP6V1A
ENSG00000166734.20	2027.08	0.691455	0.206723	3.34484	0.000823299	0.0073227	CASC4
ENSG00000233621.2	57.9731	1.56136	0.466789	3.3449	0.000823114	0.0073227	LINC01137
ENSG00000184470.21	118.297	-1.38707	0.414848	-3.34358	0.000827063	0.00735217	TXNRD2
ENSG00000174502.19	20.8613	3.47397	1.03932	3.34256	0.000830106	0.00737521	SLC26A9
ENSG00000124507.11	60.8093	1.39169	0.416395	3.34223	0.000831077	0.00737649	PACSIN1
ENSG00000113231.13	51.3286	2.47319	0.740021	3.34206	0.000831605	0.00737649	PDE8B
ENSG00000213742.7	74.9004	1.74998	0.523622	3.34207	0.000831564	0.00737649	ZNF337-AS1
ENSG00000160862.13	32.3771	2.3176	0.693586	3.34148	0.000833336	0.00737981	AZGP1
ENSG00000103811.16	566.42	-0.769144	0.230175	-3.34157	0.000833071	0.00737981	CTSH
ENSG00000112902.12	3726.13	-0.9173	0.2745	-3.34171	0.000832626	0.00737981	SEMA5A
ENSG00000187323.12	484.658	-1.05091	0.314714	-3.33925	0.000840054	0.00743528	DCC
ENSG00000233435.2	12.3784	3.24089	0.970996	3.3377	0.000844762	0.0074729	AGGF1P2
ENSG00000033627.16	1825.53	0.917928	0.275493	3.33195	0.000862411	0.00762076	ATP6V0A1
ENSG00000116717.13	310.361	1.01486	0.304581	3.33199	0.00086228	0.00762076	GADD45A
ENSG00000010361.14	122.551	-1.0441	0.313553	-3.32988	0.000868827	0.0076733	FUZ
ENSG00000160746.13	299.832	1.0204	0.306527	3.32893	0.000871816	0.00769555	ANO10
ENSG00000215252.11	681.709	0.867933	0.260791	3.32808	0.000874466	0.00771476	GOLGA8B
ENSG00000154639.19	1099.73	0.786721	0.23656	3.32567	0.000882067	0.00776923	CXADR
ENSG00000136770.11	290.666	1.20089	0.361091	3.32573	0.000881884	0.00776923	DNAJC1
ENSG00000146411.6	65.8245	1.90712	0.573406	3.32595	0.000881181	0.00776923	SLC2A12
ENSG00000142920.17	96.0584	1.84739	0.555569	3.32522	0.000883476	0.00777745	AZIN2
ENSG00000171824.14	393	-0.93691	0.281781	-3.32496	0.000884314	0.00778063	EXOSC10
ENSG00000149636.15	308.289	-1.01906	0.306506	-3.32477	0.000884909	0.00778167	DSN1
ENSG00000137216.19	814.453	0.718005	0.216045	3.32341	0.000889243	0.00781558	TMEM63B
ENSG00000148219.16	303.862	0.922236	0.277563	3.32261	0.000891781	0.00782945	ASTN2
ENSG00000075461.6	1027.77	-1.10462	0.332451	-3.32266	0.000891619	0.00782945	CACNG4
ENSG00000120784.16	270.97	-0.898272	0.270505	-3.32073	0.000897837	0.00787839	ZFP30
ENSG00000099219.14	217.099	0.951831	0.2868	3.3188	0.000904045	0.0079286	ERMP1
ENSG00000261210.8	31.4457	2.1481	0.647526	3.3174	0.000908598	0.00796426	CLEC19A
ENSG00000182379.10	79.4791	1.61313	0.486317	3.31705	0.000909747	0.00796917	NXPH4
ENSG00000175087.10	227.14	-0.963277	0.290412	-3.31693	0.000910135	0.00796917	PDIK1L
ENSG00000107485.18	16.9083	2.82352	0.851431	3.3162	0.000912495	0.00798556	GATA3
ENSG00000156587.16	695.773	-0.752871	0.227105	-3.31508	0.000916185	0.00801355	UBE2L6
ENSG00000261371.6	16.7379	3.88797	1.17383	3.31221	0.000925614	0.00809169	PECAM1
ENSG00000131236.17	2510.17	0.678632	0.204933	3.31147	0.00092806	0.00810566	CAP1
ENSG00000189108.13	13.9298	4.17141	1.25974	3.31133	0.000928546	0.00810566	IL1RAPL2
ENSG00000276234.5	277.587	-0.861188	0.260077	-3.31128	0.000928702	0.00810566	TADA2A
ENSG00000112218.9	17.3553	2.55346	0.771181	3.3111	0.000929308	0.00810663	GPR63
ENSG00000287574.1	31.2259	1.98265	0.598844	3.3108	0.000930312	0.00810672	AC004938.2
ENSG00000119699.7	273.875	-1.04409	0.315347	-3.31094	0.000929847	0.00810672	TGFB3
ENSG00000287783.1	27.1197	2.59714	0.784584	3.31021	0.000932249	0.00811062	AC020930.1
ENSG00000115211.15	484.253	-0.798742	0.241289	-3.31031	0.000931931	0.00811062	EIF2B4
ENSG00000063244.12	1009.69	-0.910335	0.274985	-3.31049	0.000931313	0.00811062	U2AF2
ENSG00000142676.14	3516.02	0.71392	0.215698	3.30981	0.000933604	0.00811808	RPL11
ENSG00000185988.14	18.2104	3.02178	0.91317	3.3091	0.000935952	0.00813416	PLK5
ENSG00000012171.20	212.352	-1.00249	0.302996	-3.30859	0.000937679	0.00814051	SEMA3B
ENSG00000166925.9	1113.87	-0.954995	0.28864	-3.3086	0.000937627	0.00814051	TSC22D4
ENSG00000253973.3	15.4196	3.4791	1.05173	3.30797	0.000939751	0.00815416	AC079296.1
ENSG00000179163.11	106.226	1.46499	0.443005	3.30694	0.0009432	0.00817598	FUCA1
ENSG00000185090.14	286.952	-0.938678	0.283852	-3.30692	0.000943267	0.00817598	MANEAL
ENSG00000196586.16	1669.33	0.692592	0.209453	3.30667	0.000944134	0.00817916	MYO6
ENSG00000173272.16	70.9076	-1.55324	0.469754	-3.3065	0.000944684	0.00817958	MZT2A
ENSG00000163932.15	55.0678	1.34307	0.406217	3.30628	0.000945439	0.00818178	PRKCD
ENSG00000147586.10	239.193	1.15856	0.350511	3.30535	0.000948588	0.00820469	MRPS28
ENSG00000125266.8	539.893	0.979088	0.296263	3.30479	0.000950478	0.00821668	EFNB2
ENSG00000073050.11	286.618	-0.898453	0.271909	-3.30424	0.00095235	0.0082285	XRCC1
ENSG00000169105.7	253.753	-0.906022	0.27422	-3.304	0.000953174	0.00823127	CHST14
ENSG00000069535.14	3919.16	-0.777728	0.235453	-3.30311	0.000956192	0.00825297	MAOB
ENSG00000173698.18	15.9033	2.94781	0.892663	3.30227	0.000959071	0.00827345	ADGRG2
ENSG00000136052.9	288.802	1.01182	0.30643	3.30195	0.000960139	0.00827829	SLC41A2
ENSG00000005238.19	449.448	-1.11387	0.337411	-3.30123	0.000962608	0.00829519	FAM214B
ENSG00000164674.15	17.6163	3.01899	0.914576	3.30097	0.000963495	0.00829846	SYTL3
ENSG00000177337.8	38.503	2.61373	0.791862	3.30074	0.000964313	0.00830113	DLGAP1-AS1
ENSG00000260101.1	41.2422	1.8542	0.561886	3.29996	0.000967	0.00831987	AC008074.2
ENSG00000145491.12	12.813	3.71378	1.12557	3.29947	0.000968665	0.0083298	ROPN1L
ENSG00000113448.19	253.826	1.05331	0.319301	3.29881	0.000970961	0.00834515	PDE4D
ENSG00000259553.6	12.0824	3.25444	0.98713	3.29687	0.000977676	0.00839845	AC140725.1
ENSG00000087074.8	278.206	-1.13379	0.344033	-3.2956	0.000982119	0.00843217	PPP1R15A
ENSG00000049860.14	1186.44	0.73343	0.222649	3.29411	0.000987349	0.00847263	HEXB
ENSG00000165309.14	17.178	2.90191	0.880993	3.29391	0.000988041	0.00847411	ARMC3
ENSG00000272668.2	21.8736	2.62538	0.797149	3.29346	0.000989628	0.00848326	AL590560.3
ENSG00000116106.12	1065.7	0.751381	0.228306	3.29111	0.000997929	0.00854994	EPHA4
ENSG00000179832.17	146.926	1.21661	0.369724	3.29059	0.000999761	0.00856114	MROH1
ENSG00000156875.14	480.232	-0.779854	0.237228	-3.28736	0.00101132	0.00865558	MFSD14A
ENSG00000280418.1	10.4676	4.92645	1.49977	3.28481	0.00102052	0.00872744	AC007326.2
ENSG00000140067.6	101.813	-1.48848	0.453172	-3.28459	0.00102132	0.00872744	FAM181A
ENSG00000134330.19	413.566	-0.85738	0.261025	-3.28467	0.00102102	0.00872744	IAH1
ENSG00000280287.1	40.7602	1.57911	0.480872	3.28384	0.00102405	0.00874618	AC131212.3
ENSG00000198417.7	173.515	0.993761	0.302743	3.28252	0.00102883	0.0087824	MT1F
ENSG00000277270.2	85.5656	1.90158	0.579387	3.28205	0.00103056	0.0087926	AL160412.1
ENSG00000123124.14	319.578	1.21669	0.370781	3.28143	0.00103282	0.00880726	WWP1
ENSG00000228716.7	1313.27	-0.813781	0.248028	-3.281	0.00103439	0.00881611	DHFR
ENSG00000160781.17	531.51	-0.754483	0.230007	-3.28027	0.00103709	0.00883449	PAQR6
ENSG00000138061.12	13.357	3.40975	1.03954	3.28005	0.00103788	0.00883661	CYP1B1
ENSG00000170946.15	338.396	0.886004	0.27017	3.27943	0.00104016	0.0088514	DNAJC24
ENSG00000155792.10	22.2959	2.86288	0.87305	3.27917	0.00104111	0.00885489	DEPTOR
ENSG00000105793.15	429.386	0.842828	0.257164	3.27739	0.0010477	0.00890165	GTPBP10
ENSG00000113161.16	3097.2	-0.698855	0.213227	-3.27752	0.00104725	0.00890165	HMGCR
ENSG00000138395.16	11.8216	4.00136	1.22124	3.27647	0.00105114	0.00892452	CDK15
ENSG00000183098.11	174.89	-0.912315	0.278478	-3.27608	0.00105258	0.00892452	GPC6
ENSG00000171951.5	10792.6	1.1747	0.358564	3.27612	0.00105244	0.00892452	SCG2
ENSG00000262655.4	729.607	-0.979402	0.298943	-3.27622	0.00105207	0.00892452	SPON1
ENSG00000172339.10	165.861	-1.538	0.46963	-3.27492	0.00105694	0.00895681	ALG14
ENSG00000228412.9	37.899	2.33684	0.713795	3.27382	0.00106105	0.00898697	AL022068.1
ENSG00000112029.10	317.577	-1.11165	0.339874	-3.27078	0.00107252	0.00907944	FBXO5
ENSG00000075702.18	329.064	-0.875052	0.267674	-3.2691	0.0010789	0.00912875	WDR62
ENSG00000274021.1	15.1867	3.3384	1.02159	3.26785	0.00108367	0.00916365	AC024909.1
ENSG00000144036.15	776.365	0.856592	0.262137	3.26773	0.00108415	0.00916365	EXOC6B
ENSG00000133103.17	257.369	0.889981	0.272455	3.26653	0.00108875	0.00919698	COG6
ENSG00000164087.8	189.82	-0.925209	0.28325	-3.26641	0.00108922	0.00919698	POC1A
ENSG00000102409.10	137.822	0.992289	0.303863	3.26559	0.00109238	0.00921879	BEX4
ENSG00000134986.13	3309.75	-1.24518	0.381338	-3.2653	0.0010935	0.00921879	NREP
ENSG00000253368.4	252.907	1.05627	0.323469	3.26544	0.00109296	0.00921879	TRNP1
ENSG00000138795.10	231.44	1.23761	0.379264	3.26319	0.00110165	0.00928273	LEF1
ENSG00000166548.16	376.715	-1.05147	0.322254	-3.26288	0.00110287	0.0092882	TK2
ENSG00000118965.14	453.124	0.900123	0.275988	3.26146	0.0011084	0.00932998	WDR35
ENSG00000163155.12	210.194	-0.852213	0.261387	-3.26035	0.00111276	0.00936009	LYSMD1
ENSG00000129167.9	37.9722	2.35615	0.722688	3.26025	0.00111312	0.00936009	TPH1
ENSG00000138162.19	202.05	-1.13503	0.348303	-3.25874	0.0011191	0.00940549	TACC2
ENSG00000198919.13	306.412	0.870394	0.267203	3.25743	0.00112427	0.00944408	DZIP3
ENSG00000100410.8	227.076	-0.927717	0.284898	-3.25632	0.00112868	0.00947628	PHF5A
ENSG00000115419.12	1005.09	1.0196	0.31316	3.25583	0.00113061	0.00948274	GLS
ENSG00000134594.5	53.6879	-1.59479	0.489808	-3.25595	0.00113014	0.00948274	RAB33A
ENSG00000197321.14	88.1757	1.89286	0.581662	3.25423	0.00113701	0.00952954	SVIL
ENSG00000187325.5	427.56	-1.04211	0.32024	-3.25414	0.00113736	0.00952954	TAF9B
ENSG00000145087.12	49.0847	1.87156	0.575302	3.25317	0.00114124	0.00955224	STXBP5L
ENSG00000152518.8	419.207	-0.794552	0.244233	-3.25325	0.00114093	0.00955224	ZFP36L2
ENSG00000187775.16	12.2853	3.83706	1.18004	3.25162	0.00114748	0.0095996	DNAH17
ENSG00000165810.17	23.0794	2.78102	0.855802	3.24961	0.00115565	0.00966292	BTNL9
ENSG00000121060.18	726.44	0.780738	0.240271	3.2494	0.00115648	0.00966492	TRIM25
ENSG00000166845.15	188.48	-1.11654	0.343748	-3.24815	0.00116159	0.00970271	C18orf54
ENSG00000138678.11	81.3141	2.08335	0.641447	3.24789	0.00116263	0.00970639	GPAT3
ENSG00000249853.7	26.0015	2.85218	0.878899	3.24517	0.00117381	0.00978971	HS3ST5
ENSG00000025770.19	471.363	-0.731735	0.225484	-3.24518	0.00117377	0.00978971	NCAPH2
ENSG00000108381.11	356.196	-1.38674	0.427673	-3.24253	0.00118472	0.00987568	ASPA
ENSG00000125355.15	873.22	-0.914892	0.282191	-3.24211	0.0011865	0.00988547	TMEM255A
ENSG00000185950.9	130.524	-0.954591	0.29445	-3.24194	0.00118719	0.00988617	IRS2
ENSG00000144580.13	666.776	-0.702366	0.216756	-3.24036	0.00119379	0.00992887	CNOT9
ENSG00000187498.16	883.413	-0.869607	0.268374	-3.24028	0.00119414	0.00992887	COL4A1
ENSG00000100429.18	89.1293	-1.18828	0.366702	-3.24045	0.00119342	0.00992887	HDAC10
ENSG00000171222.10	81.496	-1.1922	0.367955	-3.24006	0.00119504	0.00993128	SCAND1
ENSG00000136490.9	129.291	-1.1764	0.363146	-3.23947	0.00119753	0.00994691	LIMD2
ENSG00000135390.20	1089.4	-0.763084	0.235576	-3.23923	0.00119855	0.00995031	ATP5MC2
ENSG00000176978.14	210.476	-0.971074	0.299806	-3.23901	0.00119947	0.0099529	DPP7
ENSG00000133816.15	226.539	1.65332	0.510677	3.23752	0.00120575	0.00999998	MICAL2
ENSG00000198478.8	60.3494	1.43517	0.443465	3.23627	0.00121105	0.0100388	SH3BGRL2
ENSG00000198805.11	380.377	1.13962	0.352328	3.23455	0.00121833	0.010094	PNP
ENSG00000188542.9	64.1081	-1.34114	0.414685	-3.23413	0.00122016	0.010104	DUSP28
ENSG00000197372.10	182.314	-1.00405	0.310504	-3.2336	0.0012224	0.0101175	ZNF675
ENSG00000073792.15	254.795	1.02176	0.316	3.23343	0.00122313	0.0101184	IGF2BP2
ENSG00000168016.14	163.054	1.40114	0.433383	3.23303	0.00122483	0.0101273	TRANK1
ENSG00000153936.17	642.071	0.884143	0.273564	3.23194	0.00122953	0.0101609	HS2ST1
ENSG00000151665.13	383.606	0.874465	0.270581	3.2318	0.00123014	0.0101609	PIGF
ENSG00000109084.14	370.364	-1.13897	0.352456	-3.23154	0.00123127	0.0101651	TMEM97
ENSG00000131015.5	89.4948	2.01059	0.622221	3.23131	0.00123226	0.0101681	ULBP2
ENSG00000169592.15	303.129	-0.81921	0.253586	-3.2305	0.00123572	0.0101916	INO80E
ENSG00000204334.7	15.7176	2.67071	0.827273	3.22833	0.00124515	0.0102606	ERICH2
ENSG00000135423.13	20.3984	2.12511	0.658278	3.22828	0.00124535	0.0102606	GLS2
ENSG00000108439.10	405.098	0.753864	0.233727	3.2254	0.00125795	0.0103592	PNPO
ENSG00000144283.21	554.113	0.842515	0.26123	3.22519	0.00125889	0.0103617	PKP4
ENSG00000134996.12	65.6836	2.18405	0.67726	3.22484	0.00126044	0.0103693	OSTF1
ENSG00000185513.16	29.8649	2.35779	0.731247	3.22435	0.0012626	0.0103714	L3MBTL1
ENSG00000108179.14	324.108	-0.868449	0.269325	-3.22454	0.00126175	0.0103714	PPIF
ENSG00000148341.17	510.016	0.786797	0.244012	3.22442	0.00126227	0.0103714	SH3GLB2
ENSG00000116898.12	220.39	-0.821789	0.254937	-3.22349	0.00126638	0.0103972	MRPS15
ENSG00000076201.15	420.966	-0.782639	0.242879	-3.22234	0.00127148	0.0104286	PTPN23
ENSG00000140474.14	449.473	-0.89255	0.276983	-3.2224	0.0012712	0.0104286	ULK3
ENSG00000213339.9	172.684	-1.10084	0.341785	-3.22087	0.00127802	0.010476	QTRT1
ENSG00000108370.17	40.2321	2.08858	0.648505	3.22061	0.00127919	0.010476	RGS9
ENSG00000095383.20	55.9606	1.45516	0.451827	3.22061	0.00127917	0.010476	TBC1D2
ENSG00000011677.13	57.6126	1.44767	0.449532	3.22038	0.00128019	0.0104789	GABRA3
ENSG00000166997.8	255.648	-0.821378	0.255106	-3.21975	0.00128301	0.0104968	CNPY4
ENSG00000117620.15	446.74	0.998494	0.310155	3.21934	0.00128488	0.0105068	SLC35A3
[truncated: 58,612 more rows]
